# Supplementary material for: Nickel-catalyzed oxidative C–H/N–H annulation of N-heteroaromatic compounds with alkynes
Source: Royal Society of Chemistry journal article supplement (doi:10.1039/c8sc05063e), 2019-01-01
Supplement: c8sc05063e1.pdf [file c8sc05063e1.pdf]

## Supporting Information

### Nickel-Catalyzed Oxidative C-H/N-H Annulation of N-Heteroaromatic Compounds with Alkynes

Atsushi Obata, Akane Sasagawa, Ken Yamazaki, Yusuke Ano, and Naoto Chatani\*

*Department of Applied chemistry, Faculty of Engineering, Osaka University, Suita, Osaka 565-0871, Japan*

#### Contents

|                                                                               |      |
|-------------------------------------------------------------------------------|------|
| <b>1. General Information</b>                                                 | S2   |
| <b>2. Materials</b>                                                           | S2   |
| <b>3. General Procedure for the Preparation of Starting Materials</b>         | S3   |
| <b>4. General Procedure for the Ni-catalyzed Oxidative Annulation</b>         | S7   |
| <b>5. Copies of <sup>1</sup>H and <sup>13</sup>C NMR Spectra</b>              | S14  |
| <b>6. Gibbs Free Energy Profile of the Initial Path</b>                       | S60  |
| <b>7. Computational Details</b>                                               | S61  |
| <b>8. Energies for Calculated Structures</b>                                  | S61  |
| <b>9. B3LYP/6-31+G(d)-Lanl2dz-Optimized Structures of the Model Compounds</b> | S63  |
| <b>10. Cartesian Coordinates of the Optimized Geometries and Energies</b>     | S68  |
| <b>11. References</b>                                                         | S133 |

## 1. General Information

$^1\text{H}$  and  $^{13}\text{C}$  NMR spectra were recorded on a JEOL ECS-400 spectrometer (JEOL, Tokyo, Japan) in  $\text{CDCl}_3$  or acetone- $d_6$  with tetramethylsilane as the internal standard. Data are reported as follows: chemical shifts ( $\delta$ ) in ppm, multiplicity (s = singlet, d = doublet, t = triplet, q = quartet, br s = broad singlet, m = multiplet, c = complex), coupling constant ( $J$ ) in hertz (Hz), and integration. Infrared spectra (IR) were obtained using a JASCO FT/IR-4200 spectrometer; absorptions have been reported in reciprocal centimeters with the following relative intensities: vs (very strong), s (strong), m (medium), w (weak). Mass spectra were obtained on a Shimadzu GCMS-QP 2014 or Shimadzu GCMS-QP 5000 instruments using ionization voltages of 70 eV. High resolution mass spectra (HRMS) were obtained on a JEOL JMS-DX303 or MS-T100LP instrument. Melting points (Mp) were determined using a Yamato melting point apparatus. Column chromatography was performed with Silicycle Silia Flash F60 (230-400 mesh, Silicycle Inc.). Most of the compounds were purified by LC-908 HPLC (GPC).

## 2. Materials

All chemicals were used as received.

**Nickel sources:**  $\text{Ni}(\text{cod})_2$  (Strem Chemicals),  $\text{Ni}(\text{OAc})_2$ ,  $\text{Ni}(\text{OTf})_2$  (prepared according to the literature<sup>1</sup>).

**Ligand:** 4,4'-di-tert-butyl-2,2'-bipyridyl (Aldrich), Bathophenanthroline (Kanto Chemical Co., Inc), 2-(2-Pyridyl)benzoxazole (Tokyo Chemical Industry Co., Ltd), 3,4,7,8,-tetramethyl-1,10-phenanthroline (Tokyo Chemical Industry Co., Ltd), 6,6'-dimethyl-2,2'-bipyridyl (Tokyo Chemical Industry Co., Ltd),  $\text{PPh}_3$  (Wako Pure Chemicals Industries, Ltd).

**Indoles:** 2-phenyl-1H-indole-3-carbaldehyde (Aldrich), 2-phenyl-1H-indole (Tokyo Chemical Industry Co., Ltd), 2-(p-tolyl)-1H-indole (Tokyo Chemical Industry Co., Ltd), 2-(4-fluorophenyl)-1H-indole (Tokyo Chemical Industry Co., Ltd), 2-(4-methoxyphenyl)-1H-indole (Tokyo Chemical Industry Co., Ltd), 3,5-diphenyl-1H-pyrazole (Tokyo Chemical Industry Co., Ltd).

**Benzimidazoles:** 2-phenylbenzimidazole (Tokyo Chemical Industry Co., Ltd).

**Alkynes:** diphenylacetylene (Tokyo Chemical Industry Co., Ltd).

**Bases:** KOMe (Aldrich), NaHMDS (Aldrich), KO<sup>t</sup>Bu (Tokyo Chemical Industry Co., Ltd).

**Solvents:** DMSO, super dehydrated (Kanto Chemical Co., Inc), toluene, super dehydrated (Wako Pure Chemical Industries, Ltd).

---

<sup>1</sup> Y. Aihara, N. Chatani, *J. Am. Chem. Soc.* **2013**, *135*, 5308.

### 3. General Procedure for the Preparation of Starting Materials

#### (1) Synthesis of 2-Arylindoles.<sup>2</sup>

Acetophenone (10 mmol), phenylhydrazine (12 mmol), HOAc (2 mmol) and EtOH (10 mL) were charged in a round bottom flask and the resulting solution then refluxed at 100 °C. When the reaction reached completion (as detected by TLC), the mixture was cooled to room temperature. The solvent was removed by evaporation and the crude hydrozone was then dissolved in toluene (10 mL). Polyphosphoric acid (PPA, 15 mmol) was added to the solution, which was then refluxed at 120 °C overnight followed by cooling. The crude mixture was quenched by adding H<sub>2</sub>O (10 mL) and extracted with EtOAc (3 × 10 mL). The combined organic layers were dried over anhydrous Na<sub>2</sub>SO<sub>4</sub> and the solution evaporated to dryness. The resulting crude 2-phenylindole was purified by flash chromatography on silica gel (eluent: hexanes/EtOAc = 10/1) and recrystallized from EtOAc/hexane.

#### (2) Synthesis of 5-Methoxy-2-phenyl-1H-indole.<sup>3</sup>

A round bottom flask was charged with 5-methoxyindole (6 mmol), 2-norbornene (0.4 mmol), K<sub>2</sub>CO<sub>3</sub> (12 mmol) and PdCl<sub>2</sub>(MeCN)<sub>2</sub> (0.6 mmol, 10 mol%). A solution of H<sub>2</sub>O (15 mmol) in DMA (30 mL) was added, followed by iodobenzene (12 mmol). The solution was stirred overnight at 70 °C. When the reaction reached completion, the solution was cooled to room temperature, diluted with EtOAc (20 mL), and filtered. The filtrate was washed with H<sub>2</sub>O (3 × 10 mL) and brine and the organic phase was then concentrated by evaporation. The resulting crude indole preparation was purified by flash chromatography on silica gel (eluent: hexane/EtOAc = 10/1) and recrystallized from EtOAc/hexane to afford 5-methoxy-2-phenyl-1H-indole.

#### (3) Synthesis of 2-(4-(Trifluoromethyl)phenyl)-1H-benzo[d]imidazole and 2-(4-Methoxyphenyl)-1H-benzo[d]imidazole.<sup>4</sup>

Iodobenzene diacetate (6 mmol) was added to a mixture of o-phenylenediamine (3 mmol) and benzaldehyde (3 mmol) at room temperature and the resulting mixture was stirred for a few minutes. The crude mixture was washed with a saturated aqueous solution of Na<sub>2</sub>CO<sub>3</sub> and then extracted with EtOAc (3 × 10 mL). The combined organic layers were dried over anhydrous Na<sub>2</sub>SO<sub>4</sub> and the solution evaporated to dryness. The resulting crude benz[d]imidazole was purified by flash chromatography on silica gel (eluent: hexanes/EtOAc = 1/1) and recrystallized from EtOAc.

<sup>2</sup> Lian, X.-L.; Lei, H.; Quan, X.-J.; Ren, Z.-H.; Wang, Y.-Y.; Guan, Z.-H. *Chem. Commun.* **2013**, 49, 8196.

<sup>3</sup> Gao, Y.; Zhu, W.; Yin, L.; Dong, B.; Fu, J.; Ye, .; Xue, F.; Jiang, C. *Tetrahedron Lett.* **2017**, 58, 2213.

<sup>4</sup> L.-H. Du and X.-P. Luo, *Synth. Commun.* **2010**, 2880.

### (3) Synthesis of 2-Phenyl-1H-Pyrrole.<sup>5</sup>

A round bottom flask was charged with diphenyliodonium bromide (4.5 mmol), NaOH (6.75 mmol) and pyrrole (22.5 mL). The solution was stirred at 80 °C for 10 h, after which, it was cooled to room temperature. The pyrrole was removed in vacuo, the mixture was diluted with EtOAc (20 mL), and washed with H<sub>2</sub>O (3 × 10 mL) and brine. After concentrating the solution in vacuo, the resulting crude product was purified by flash chromatography on silica gel (eluent: hexans/EtOAc = 10/1) and Gel Permeation Chromatography (GPC).

### 4. General procedure for the Ni-catalyzed oxidative annulation

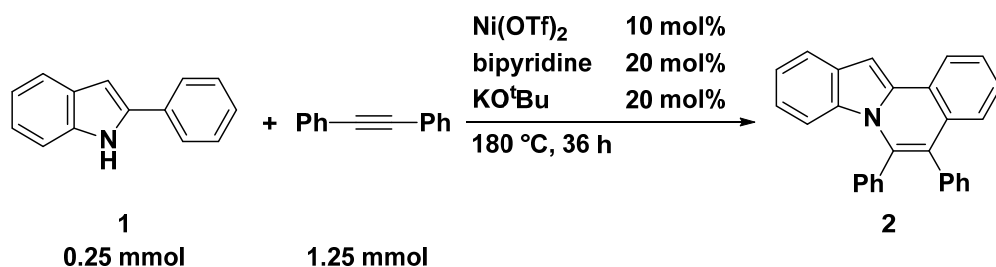

To an oven-dried 5 mL screw-capped vial in a glove box, 2-phenyl-1H-indole (**1a**, 48.3 mg, 0.25 mmol), diphenylacetylene (227 mg, 1.25 mmol), Ni(OTf)<sub>2</sub> (8.9 mg, 0.025 mmol), 4,4'-di-*tert*-butyl-2,2'-bipyridine (13.4 mg, 0.05 mmol), and KO<sup>t</sup>Bu (5.7 mg, 0.05 mmol) were added. The mixture was stirred for 36 h at 180 °C and then allowed to cool to room temperature. The resulting mixture was filtered through a celite pad and the filtrate was concentrated in vacuo. The residue was purified by column chromatography on silica gel (hexane/chloroform=3/1), followed by GPC to afford the desired product **2a** (48.1 mg, 52% yield) as a green solid. Both <sup>1</sup>H and <sup>13</sup>C NMR spectra showed that the product is apparently pure, as attached, but it was not possible to remove the color from the product, even after repeated recrystallization.

### 5,6-diphenylindolo[2,1-a]isoquinoline (**2a**)<sup>6</sup>

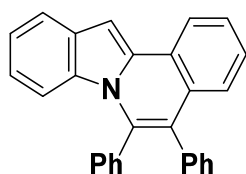

Green solid. R<sub>f</sub> = 0.26 (hexane/chloroform 3:1). Yield = 52 %, m = 48.1 mg. <sup>1</sup>H NMR (399.78 MHz, CDCl<sub>3</sub>): δ 5.98-6.01 (m, 1H), 6.80-6.84 (m, 1H), 7.15-7.40 (m, 14H), 7.48 (dd, *J* = 7.3, 7.3 Hz, 1H), 7.78 (d, *J* = 7.8 Hz, 1H), 8.28 (d, *J* = 7.8 Hz, 1H); <sup>13</sup>C NMR (100.53 MHz, CDCl<sub>3</sub>): δ 94.3, 114.7, 120.2, 120.3, 121.5, 121.7, 123.4, 125.5, 126.2, 126.8, 127.1, 127.4, 127.9, 128.7, 128.8, 129.7, 130.3, 130.9, 131.9, 132.8, 135.4, 136.0, 136.1, 136.8.; HRMS Calcd for C<sub>28</sub>H<sub>20</sub>N (M+H)<sup>+</sup>: 370.1590; Found: 370.1583.

### 3-methyl-5,6-diphenylindolo[2,1-a]isoquinoline (**2b**)

<sup>5</sup> Wen, J.; Zhang, R.-Y.; Chen, S.-Y.; Zhang, J.; Yu, X.-Q. *J. Org. Chem.* **2012**, *77*, 766.

<sup>6</sup> Ackermann, L.; Wang, L.; Lygin, A. V. *Chem. Sci.* **2012**, *3*, 177.

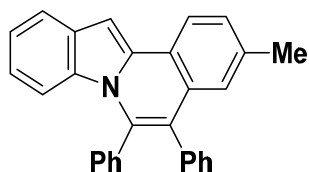

Green solid, Mp = 241-242 °C. R<sub>f</sub> = 0.23 (hexane/chloroform 3:1). Yield = 50 %, m = 48.2 mg. **<sup>1</sup>H NMR** (399.78 MHz, CDCl<sub>3</sub>): δ 2.34 (s, 3H), 5.96 (d, *J* = 8.7 Hz, 1H), 6.78 (dd, *J* = 7.8, 7.3 Hz, 1H), 6.93 (s, 1H), 7.16-7.34 (m, 13H), 7.77 (d, *J* = 7.8 Hz, 1H), 8.20 (d, *J* = 7.8 Hz, 1H); **<sup>13</sup>C NMR** (100.53 MHz, CDCl<sub>3</sub>): δ 21.9, 93.5, 114.6, 119.9, 120.2, 121.4, 121.7, 123.1, 123.5, 126.2, 126.8, 127.9, 128.6, 128.7, 128.8, 129.9, 130.3, 131.0, 132.0, 132.7, 135.5, 136.2, 136.3, 136.9, 137.5. **IR** (ATR): 3057 w, 1612 w, 1544 w, 1485 w, 1442 w, 1380 w, 1340 w, 1299 w, 1249 w, 1151 w, 1101 w, 1071 w, 1024 w, 843 w, 816 w, 759 w, 696 w. **MS** (EI<sup>+</sup>): 384 (32), 383 (M<sup>+</sup>, 100). **HRMS** (EI<sup>+</sup>) Calcd for C<sub>29</sub>H<sub>21</sub>N: 383.1674; Found: 383.1677.

### 3-(tert-butyl)-5,6-diphenylindolo[2,1-a]isoquinoline (2c)

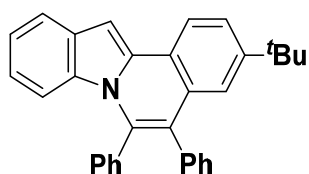

Green solid, Mp = 262 °C. R<sub>f</sub> = 0.31 (hexane/chloroform 3:1). Yield = 52 %, m = 54.9 mg. **<sup>1</sup>H NMR** (399.78 MHz, CDCl<sub>3</sub>): δ 1.24 (s, 9H), 5.97 (d, *J* = 8.3 Hz, 1H), 6.79 (dd, *J* = 7.3, 7.3 Hz, 1H), 7.15-7.26 (m, 7H), 7.30-7.36 (m, 6H), 7.58 (d, *J* = 8.3 Hz, 1H), 7.77 (d, *J* = 7.8 Hz, 1H), 8.24, (d, *J* = 8.3 Hz, 1H); **<sup>13</sup>C NMR** (100.53 MHz, CDCl<sub>3</sub>): δ 31.3, 35.0, 93.6, 114.7, 119.9, 120.2, 121.6, 121.9, 122.6, 123.1, 123.3, 125.0, 126.8, 127.9, 128.7, 128.8, 129.9, 130.1, 131.0, 131.9, 132.8, 135.6, 136.0, 136.2, 136.9, 150.6. **IR** (ATR): 2959 w, 1602 w, 1547 w, 1484 w, 1443 w, 1418 w, 1336 w, 1260 w, 1156 w, 1124 w, 1072 w, 1020 w, 894 w, 829 w, 788 w, 755 m, 696 w. **MS** (EI<sup>+</sup>): 426 (34), 425 (M<sup>+</sup>, 100), 410 (18), 395 (15). **HRMS** (EI<sup>+</sup>) Calcd for C<sub>32</sub>H<sub>27</sub>N: 425.2143; Found: 425.2136.

### 3-methoxy-5,6-diphenylindolo[2,1-a]isoquinoline (2d)

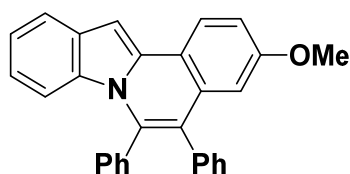

Green solid, Mp = 210-212 °C. R<sub>f</sub> = 0.11 (hexane/chloroform 3:1). Yield = 67 %, m = 66.7 mg. **<sup>1</sup>H NMR** (399.78 MHz, CDCl<sub>3</sub>): δ 3.71 (s, 3H), 5.95 (d, *J* = 8.7 Hz, 1H), 6.59 (s, 1H), 6.77 (dd, *J* = 7.8, 7.8 Hz, 1H), 7.10-7.36 (m, 13H), 7.75 (d, *J* = 8.3 Hz, 1H), 8.22, (d, *J* = 8.7 Hz, 1H); **<sup>13</sup>C NMR** (100.53 MHz, CDCl<sub>3</sub>): δ 55.4, 92.7, 109.3, 114.6, 115.2, 119.3, 119.7, 120.0, 121.3, 121.7, 125.1, 126.9, 128.0, 128.7, 128.8, 130.1, 130.9, 131.9, 132.0, 132.6, 135.5, 136.3, 136.6, 136.8, 159.1. ; **IR** (ATR): 1606 w, 1485 w, 1444 w, 1290 w,

1173 w, 1028 w, 824 w, 774 w, 726 w, 697 w. **MS** (EI+): 400 (31), 399 ( $M^+$ , 100). **HRMS** (EI+) Calcd for  $C_{29}H_{21}NO$ : 399.1632; Found: 399.1621.

### 3-fluoro-5,6-diphenylindolo[2,1-a]isoquinoline (2e)<sup>6</sup>

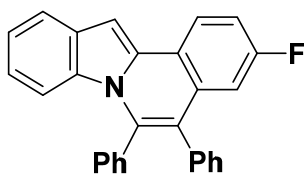

Green solid.  $R_f$  = 0.26 (hexane/chloroform 3:1). Yield = 62 %, m = 59.5 mg. **<sup>1</sup>H NMR** (399.78 MHz,  $CDCl_3$ ):  $\delta$  5.96 (d,  $J$  = 8.7 Hz, 1H), 6.78-6.83 (m, 2H), 7.14-7.36 (m, 13H), 7.77 (d,  $J$  = 7.8 Hz, 1H), 8.25 (dd,  $J$  = 8.7, 5.5 Hz, 1H); **<sup>13</sup>C NMR** (100.53 MHz,  $CDCl_3$ ):  $\delta$  94.0, 111.8 (d,  $J_{CF}$  = 23), 114.7, 115.3, (d,  $J_{CF}$  = 23), 120.3, 120.9, 122.0, 125.5 (d,  $J_{CF}$  = 9), 127.2, 128.2, 128.8, 129.0, 129.8, 130.8, 131.8, 132.4 (d,  $J_{CF}$  = 8), 132.7, 135.1, 135.5, 136.3, 137.2, 162.1 (d,  $J_{CF}$  = 244).; **HRMS** Calcd for  $C_{28}H_{19}FN$  ( $M+H$ )<sup>+</sup>: 388.1496; Found: 388.1487.

### 5,6-diphenyl-3-(trifluoromethyl)indolo[2,1-a]isoquinoline (2f)<sup>6</sup>

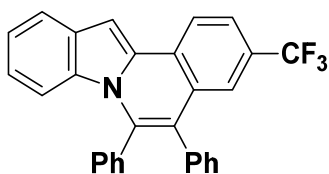

Green solid.  $R_f$  = 0.34 (hexane/chloroform 3:1). Yield = 41 %, m = 45.0 mg. **<sup>1</sup>H NMR** (399.78 MHz,  $CDCl_3$ ):  $\delta$  5.98 (d,  $J$  = 9.2 Hz, 1H), 6.86 (dd,  $J$  = 7.8, 7.8 Hz, 1H), 7.13-7.15 (m, 2H), 7.19-7.38 (m, 10H), 7.47 (s, 1H), 7.68 (d,  $J$  = 8.3 Hz, 1H), 7.79 (d,  $J$  = 7.8 Hz, 1H), 8.33 (d,  $J$  = 8.7 Hz, 1H); **<sup>13</sup>C NMR** (100.53 MHz,  $CDCl_3$ ):  $\delta$  96.2, 114.8, 120.7, 121.0, 121.2, 122.2, 123.3 (q,  $J_{CF}$  = 4), 123.4 (q,  $J_{CF}$  = 3), 123.9, 124.3 (q,  $J_{CF}$  = 270), 127.3, 128.0, 128.2, 128.9, 129.0 (q,  $J_{CF}$  = 32), 129.1, 129.6, 130.3, 130.7, 131.8, 133.0, 134.8, 135.0, 135.8, 137.5; **HRMS** Calcd for  $C_{19}H_{20}N_3O$  ( $M+H$ )<sup>+</sup>: 438.1464; Found: 438.1427.

### 5,6-diphenyl-2-(trifluoromethyl)indolo[2,1-a]isoquinoline (2g)

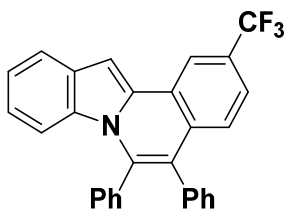

Yellow solid,  $M_p$  = 193-194 °C.  $R_f$  = 0.37 (hexane/chloroform 3:1). Yield = 73%, m = 79.5 mg. **<sup>1</sup>H NMR** (399.78 MHz,  $CDCl_3$ ):  $\delta$  5.99 (d,  $J$  = 9.0 Hz, 1H), 6.86 (dd,  $J$  = 7.9, 7.9 Hz, 1H), 7.15-7.39 (m, 12H), 7.50-7.52 (m, 2H), 7.82 (d,  $J$  = 7.8 Hz, 1H), 7.83 (s, 1H); **<sup>13</sup>C NMR** (100.53 MHz,  $CDCl_3$ ):  $\delta$  95.6, 114.8, 120.6

(d,  $J_{CF} = 4$ ), 120.7, 120.8, 121.0, 122.2, 123.5 (d,  $J_{CF} = 4$  Hz), 124.4 (q,  $J_{CF} = 271$  Hz), 125.5, 126.9, 127.2, 128.2, 128.8 (q,  $J_{CF} = 32$  Hz), 128.9, 129.2, 129.7, 130.6, 131.8, 132.8, 132.9, 134.9, 135.1, 136.2, 138.2. ;**IR** (ATR): 3058 w, 1620 w, 1549 w, 1493 w, 1445 w, 1429 m, 1384 w, 1335 m, 1313 m, 1284 w, 1243 w, 1171 w, 1146 m, 1121 m, 1072 m, 1053 w, 1023 w, 938 w, 894 w, 833 w, 789 w, 759 m, 699 m. ; **MS** (EI+): 438 (31), 437 ( $M^+$ , 100), 436 (11).; **HRMS** (EI+) Calcd for  $C_{29}H_{18}F_3N$ : 437.1391; Found: 437.1389.

### 10-methoxy-5,6-diphenylindolo[2,1-a]isoquinoline (2h) <sup>6</sup>

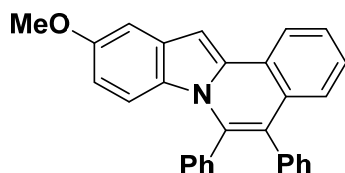

Green solid.  $R_f = 0.17$  (hexane/chloroform 3:1). Yield = 48 %, m = 47.6 mg. **<sup>1</sup>H NMR** (399.78 MHz,  $CDCl_3$ ):  $\delta$  3.85 (s, 3H), 5.85 (d,  $J = 9.2$  Hz, 1H), 6.46 (d,  $J = 9.4$  Hz, 1H), 7.14-7.38 (m, 14H), 7.50 (dd,  $J = 7.4, 7.4$  Hz, 1H), 8.28 (d,  $J = 8.2$  Hz, 1H); **<sup>13</sup>C NMR** (100.53 MHz,  $CDCl_3$ ):  $\delta$  55.6, 93.9, 100.9, 110.6, 115.5, 121.1, 123.3, 125.2, 126.2, 126.9, 127.0, 127.3, 127.9, 128.0, 128.8, 128.9, 130.2, 130.6, 130.9, 131.9, 135.3, 135.9, 136.6, 136.8, 155.2.; **HRMS**(EI+) Calcd for  $C_{29}H_{21}NO$ : 399.1623; Found: 399.1628.

### 10-fluoro-5,6-diphenylindolo[2,1-a]isoquinoline (2i) <sup>6</sup>

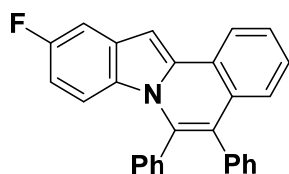

Green solid.  $R_f = 0.31$  (hexane/chloroform 3:1). Yield = 62 %, m = 60.3 mg. **<sup>1</sup>H NMR** (399.78 MHz,  $CDCl_3$ ):  $\delta$  5.88 (dd,  $J = 9.6, 4.6$  Hz, 1H), 6.51-6.58 (m, 1H), 7.15-7.39 (m, 14H), 7.49-7.53 (m, 1H), 8.28 (d,  $J = 7.8$  Hz, 1H); **<sup>13</sup>C NMR** (100.53 MHz,  $CDCl_3$ ):  $\delta$  94.1 (d,  $J_{CF} = 4$  Hz), 104.5 (d,  $J_{CF} = 23$  Hz), 108.7 (d,  $J_{CF} = 26$  Hz), 115.6 (d,  $J_{CF} = 9$  Hz), 121.7, 123.5, 125.0, 126.4, 127.0, 127.3, 127.8, 128.0, 128.9, 129.0, 129.5, 130.3, 130.4 (d,  $J_{CF} = 10$  Hz), 130.9, 131.9, 135.1, 135.8, 136.6, 137.5, 158.7 (d,  $J_{CF} = 237$  Hz). ; **HRMS** Calcd for  $C_{28}H_{19}FN$  ( $M+H$ )<sup>+</sup>: 388.1496; Found: 388.1474.

### 7,8-diphenylbenzo[h]indolo[2,1-a]isoquinoline (2j) <sup>6</sup>

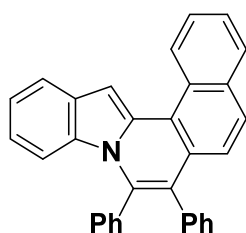

Green solid.  $R_f = 0.26$  (hexane/chloroform 3:1). Yield = 47 %,  $m = 48.8$  mg.  $^1\text{H NMR}$  (399.78 MHz,  $\text{CDCl}_3$ ):  $\delta$  6.10 (d,  $J = 8.7$  Hz, 1H), 6.86 (dd,  $J = 7.3, 7.3$  Hz, 1H), 7.19-7.36 (m, 12H), 7.63 (dd,  $J = 7.3, 7.3$  Hz, 1H), 7.73 (d,  $J = 8.7$  Hz, 1H), 7.80 (dd,  $J = 7.1, 7.1$  Hz, 1H), 7.89 (d,  $J = 7.8$  Hz, 1H), 7.95 (d,  $J = 7.8$  Hz, 1H), 8.01 (s, 1H), 9.35 (d,  $J = 8.7$  Hz, 1H);  $^{13}\text{C NMR}$  (100.53 MHz,  $\text{CDCl}_3$ ):  $\delta$  99.4, 115.0, 120.3, 120.4, 121.3, 122.1, 122.2, 124.3, 125.8, 126.1, 126.9, 127.4, 128.1, 128.8, 129.0, 129.6, 130.3, 130.8, 131.8, 132.1, 132.9, 135.0, 135.7, 136.7, 137.3.; HRMS(EI+) Calcd for  $\text{C}_{32}\text{H}_{21}\text{N}$ : 419.1674; Found: 419.1667.

#### 5,6-diphenylindolo[2,1-a]isoquinoline-12-carbaldehyde (2k) <sup>6</sup>

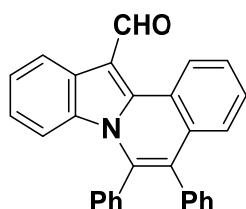

Green solid.  $R_f = 0.03$  (hexane/chloroform 3:1). Yield = 49 %,  $m = 48.2$  mg.  $^1\text{H NMR}$  (399.78 MHz,  $\text{CDCl}_3$ ):  $\delta$  6.02 (d,  $J = 8.7$  Hz, 1H), 6.89-6.93 (m, 1H), 7.15-7.42 (m, 12H), 7.56-7.60 (m, 1H), 7.67-7.72 (m, 1H), 8.65 (d,  $J = 8.2$  Hz, 1H), 9.15 (d,  $J = 8.2$  Hz, 1H), 10.99 (s, 1H);  $^{13}\text{C NMR}$  (100.53 MHz,  $\text{CDCl}_3$ ):  $\delta$  115.3, 121.0, 122.7, 124.6, 124.9, 125.7, 126.8, 127.4, 127.9, 128.2, 128.2, 129.0, 129.4, 130.1, 130.9, 131.5, 132.7, 133.2, 134.6, 135.9, 136.1, 141.3, 184.8.; HRMS(EI+) Calcd for  $\text{C}_{29}\text{H}_{19}\text{NO}$ : 397.1467; Found: 397.1472.

#### 5,6-diphenylbenzo[4,5]imidazo[2,1-a]isoquinoline (4a)

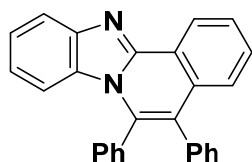

$R_f$  0.28 (Hexane/EtOAc = 150/50/3). Yield = 95%,  $m = 87.7$  mg. White Solid.  $^1\text{H NMR}$  ( $\text{CDCl}_3$ , 399.78 MHz)  $\delta$  6.01 (d,  $J = 8.5$  Hz, 1H), 6.94 (t,  $J = 7.9$  Hz, 1H), 7.20-7.31 (m, 5H), 7.32-7.45 (m, 7H), 7.59 (t,  $J = 7.6$  Hz, 1H), 7.70 (t,  $J = 7.6$  Hz, 1H), 8.00 (d,  $J = 8.3$  Hz, 1H), 9.01 (d,  $J = 8.0$  Hz, 1H);  $^{13}\text{C NMR}$  ( $\text{CDCl}_3$ , 100.53 MHz)  $\delta$  114.14, 119.40, 121.33, 122.66, 123.69, 124.23, 125.12, 126.37, 127.27, 127.83, 128.01, 128.74, 129.25, 130.00, 130.60, 131.07, 131.45, 132.65, 133.61, 135.06, 135.54, 143.81, 147.52; HRMS Calcd for  $\text{C}_{27}\text{H}_{19}\text{N}_2$  ( $\text{M}+\text{H}$ )<sup>+</sup>: 371.1543; Found: 371.1532.

#### 5,6-di-*p*-tolylbenzo[4,5]imidazo[2,1-a]isoquinoline (4b)



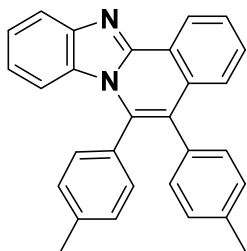

R<sub>f</sub> 0.13 (toluene /EtOAc/CHCl<sub>3</sub> = 100/5/2). Yield = 88%, m = 85.1 mg. White Solid. Mp = 265-266 °C. <sup>1</sup>H NMR (CDCl<sub>3</sub>, 399.78 MHz) δ 2.33 (s, 3H), 2.42 (s, 3H), 6.03 (d, *J* = 8.5 Hz, 1H), 6.91-6.97 (m, 1H), 7.06-7.12 (m, 4H), 7.20 (dd, *J* = 10.8, 8.5 Hz, 4H), 7.32-7.39 (m, 2H), 7.54-7.58 (m, 1H), 7.65-7.69 (m, 1H), 7.98 (d, *J* = 8.2 Hz, 1H), 8.99 (d, *J* = 7.8 Hz, 1H); <sup>13</sup>C NMR (CDCl<sub>3</sub>, 100.53 MHz) δ 21.3, 21.5, 114.3, 119.4, 121.2, 122.7, 123.6, 124.1, 125.0, 126.4, 127.6, 128.7, 129.5, 129.8, 130.4, 130.8, 131.2, 131.3, 132.6, 132.9, 135.2, 136.7, 139.0, 144.0, 147.7; IR (ATR) 3025 w, 2947 w, 1627 w, 1609 w, 1529 w, 1503 m, 1475 w, 1446 s, 1369 w, 1351 w, 1334 w, 1305 w, 1292 w, 1275 w, 1255 w, 1216 w, 1182 w, 1157 w, 1111 w, 1021 w, 828 w, 818 w, 757 s, 740 s, 700 w, 662 w ; MS(DI) *m/z* (relative intensity, %) 398 (M<sup>+</sup>, 100), 397 (23), 184 (11); HRMS Calcd for C<sub>29</sub>H<sub>22</sub>N<sub>2</sub>(M+H)<sup>+</sup>: 399.1856; Found: 399.1842.

#### 5,6-di-*p*-methoxyphenylbenzo[4,5]imidazo[2,1-*a*]isoquinoline (4c)

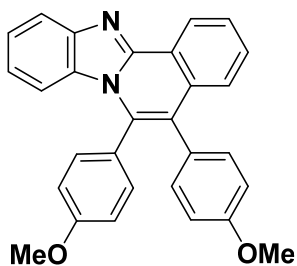

R<sub>f</sub> 0.17 (Hexane/EtOAc = 3/1). Yield = 91%, m = 96.8 mg. White Solid. Mp = 263-264 °C. <sup>1</sup>H NMR (CDCl<sub>3</sub>, 399.78 MHz) δ 3.81 (s, 3H), 3.87 (s, 3H), 6.13 (d, *J* = 8.5 Hz, 1H), 6.83 (dt, *J* = 8.7, 2.7 Hz, 2H), 6.92 (dt, *J* = 8.7, 2.7 Hz, 2H), 6.97 (ddd, *J* = 8.3, 7.1, 1.1 Hz, 1H), 7.11 (dt, *J* = 8.7, 2.7 Hz, 2H), 7.24 (dt, *J* = 8.7, 2.7 Hz, 2H), 7.38 (t, *J* = 8.2 Hz, 2H), 7.58 (td, *J* = 7.5, 1.4 Hz, 1H), 7.68 (td, *J* = 7.5, 1.2 Hz, 1H), 7.99 (d, *J* = 8.0 Hz, 1H), 8.99 (d, *J* = 8.0 Hz, 1H); <sup>13</sup>C NMR (CDCl<sub>3</sub>, 100.53 MHz) δ 55.15, 55.25, 113.47, 114.12, 114.27, 119.43, 121.19, 122.77, 123.53, 124.07, 126.18, 126.37, 127.61, 127.94, 129.83, 131.22, 131.80, 132.48, 133.06, 135.21, 144.08, 147.74, 158.47, 159.85; IR (ATR) 2359 m, 1739 s, 1609 m, 1503 s, 1444 s, 1367 s, 1291 m, 1249 s, 1219 s, 1031 m, 833 m, 771 s; MS *m/z* (relative intensity, %) 431.15 (32), 430 (M<sup>+</sup>, 100), 97 (13), 95 (10), 84 (12), 83 (13), 81 (21), 73 (13), 71 (14), 69 (41), 60 (12), 57 (23), 55 (19); HRMS Calcd for C<sub>29</sub>H<sub>23</sub>N<sub>2</sub>O<sub>2</sub> (M+H)<sup>+</sup>: 431.1754; Found: 431.1753.

#### 5,6-bis(4-fluorophenyl)benzo[4,5]imidazo[2,1-*a*]isoquinoline (4d)

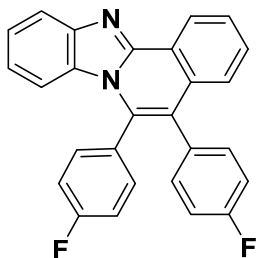

R<sub>f</sub> 0.03 (Hexane/EtOAc = 3/1). Yield = 81%, m = 80.1 mg. White Solid. Mp = 276 °C. <sup>1</sup>H NMR (CDCl<sub>3</sub>, 399.78 MHz) δ 6.08 (d, *J* = 7.8 Hz, 1H), 6.96-7.02 (m, 3H), 7.09-7.18 (m, 4H), 7.29-7.33 (m, 3H), 7.39 (t, *J* = 7.3 Hz, 1H), 7.59 (t, *J* = 7.8 Hz, 1H), 7.70 (t, *J* = 7.8 Hz, 1H), 9.00 (d, *J* = 8.2 Hz, 1H); <sup>13</sup>C NMR (CDCl<sub>3</sub>, 100.53 MHz, quant) δ 113.82, 115.20, 115.41, 116.07, 116.28, 119.62, 121.55, 122.77, 123.16, 124.40, 125.21, 126.16, 128.11, 129.58, 130.14, 130.92, 131.30, 132.41, 132.48 (d, *J* = 8.6 Hz), 132.48 (d, *J* = 8.6 Hz), 132.99 (d, *J* = 7.7 Hz), 132.99 (d, *J* = 7.7 Hz), 134.30, 143.87, 147.47, 161.95 (d, *J* = 247.3 Hz), 162.95 (d, *J* = 251.1 Hz); IR (ATR) 1064 w, 1502 s, 1446 m, 1227 s, 1158 w, 836 m, 771 m, 738 m; MS (DI) *m/z* (relative intensity, %) 407 (M<sup>+</sup>+1, 29), 406 (M<sup>+</sup>, 100), 405 (34), 310 (11); HRMS Calcd for C<sub>27</sub>H<sub>17</sub>N<sub>2</sub>F<sub>2</sub> (M+H)<sup>+</sup>: 407.1354; Found: 407.1349.

#### 5,6-diphenyl-3-(trifluoromethyl)benzo[4,5]imidazo[2,1-a]isoquinoline (4e)

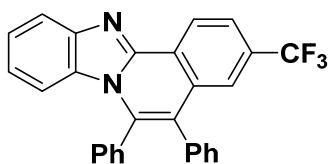

R<sub>f</sub> 0.15 (Toluene/EtOAc/CHCl<sub>3</sub> = 100/5/2). Yield = 88%, m = 94.0 mg. White Solid. <sup>1</sup>H NMR (CDCl<sub>3</sub>, 399.78 MHz) δ 6.03 (d, *J* = 8.7 Hz, 1H), 6.99 (t, *J* = 7.8 Hz, 1H), 7.21 (dd, *J* = 7.8, 1.8 Hz, 2H), 7.29-7.36 (m, 5H), 7.39-7.48 (m, 4H), 7.61 (s, 1H), 8.02 (d, *J* = 8.3 Hz, 1H), 9.14 (d, *J* = 7.7 Hz, 1H); <sup>13</sup>C NMR (CDCl<sub>3</sub>, 100.53 MHz) δ 114.28, 119.81, 121.99, 123.15, 123.45 (d, *J* = 4.1 Hz), 123.83 (d, *J* = 3.1 Hz), 123.86 (q, *J* = 272.6 Hz), 124.60, 125.05, 125.89, 127.72, 128.29, 128.86, 129.50, 130.37, 131.08, 133.18, 134.55, 136.51, 144.07, 146.52; HRMS Calcd for C<sub>29</sub>H<sub>23</sub>N<sub>2</sub>O<sub>2</sub> (M+H)<sup>+</sup>: 439.1417; Found: 439.1406.

#### 3-methoxy-5,6-diphenylbenzo[4,5]imidazo[2,1-a]isoquinoline (4f)

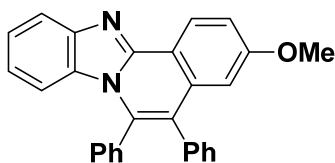

R<sub>f</sub> 0.17 (toluene/EtOAc/CHCl<sub>3</sub> = 50/5/1). Yield = 63%, m = 59.7 mg. White Solid. <sup>1</sup>H NMR (CDCl<sub>3</sub>, 399.78 MHz) δ 3.75 (s, 3H), 5.96 (d, *J* = 8.5 Hz, 1H), 6.73 (d, *J* = 2.5 Hz, 1H), 6.89 (td, *J* = 8.5, 1.1 Hz, 1H), 7.19-7.44 (m, 12H), 7.95 (d, *J* = 8.2 Hz, 1H), 8.92 (d, *J* = 9.0 Hz, 1H); <sup>13</sup>C NMR (CDCl<sub>3</sub>, 100.53 MHz, quant.) δ 161.02, 147.79, 144.03, 135.56, 135.56, 134.59, 133.66, 131.37, 131.37, 131.04, 130.53, 130.53, 129.20,

128.70, 128.70, 128.06, 128.06, 127.29, 126.99, 124.05, 123.30, 120.82, 119.04, 116.57, 116.40, 113.96, 108.75, 55.31; HRMS(DART) Calcd for C<sub>28</sub>H<sub>21</sub>ClN<sub>2</sub>O (M+H)<sup>+</sup>: 401.1648; Found: 401.1636.

#### 5,6-dipropylbenzo[4,5]imidazo[2,1-a]isoquinoline (4g)

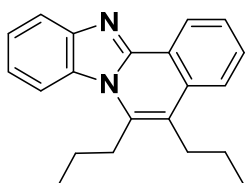

R<sub>f</sub> 0.29 (Hexane/EtOAc = 3/1). Yield = 59%, 44.3 mg. White Solid. Mp = 140 °C. <sup>1</sup>H NMR (CDCl<sub>3</sub>, 399.78 MHz) δ 1.15 (t, *J* = 7.3 Hz, 3H), 1.25 (t, *J* = 7.3 Hz, 3H), 1.69-1.78 (m, 2H), 1.87-1.97 (m, 2H), 2.98 (t, *J* = 8.1 Hz, 2H), 3.38 (t, *J* = 8.1 Hz, 2H), 7.38 (t, *J* = 8.2 Hz, 1H), 7.50 (t, *J* = 7.8 Hz, 1H), 7.63 (t, *J* = 8.0 Hz, 1H), 7.71 (t, *J* = 8.0 Hz, 1H), 7.87 (d, *J* = 8.2 Hz, 1H), 7.94 (d, *J* = 8.5 Hz, 1H), 8.04 (d, *J* = 8.2 Hz, 1H), 8.94 (d, *J* = 8.0 Hz, 1H); <sup>13</sup>C NMR (CDCl<sub>3</sub>, 100.53 MHz) δ 13.82, 14.46, 21.53, 23.78, 29.53, 31.01, 114.25, 118.75, 119.84, 121.62, 122.67, 123.44, 124.01, 125.61, 126.81, 130.00, 130.71, 131.55, 135.70, 144.05, 147.91; IR (ATR) 2959 m, 2871 w, 1523 m, 1455 m, 1373 w, 1338 w, 1286 w, 912 w, 760 m, 736 s; MS (DI) *m/z* (relative intensity, %) 303 (14), 302 (M<sup>+</sup>, 59), 274 (22), 273 (100), 258 (11), 257 (32); HRMS Calcd for C<sub>21</sub>H<sub>23</sub>N<sub>2</sub>(M+H)<sup>+</sup>: 303.1856; Found: 303.1851.

#### 5,6-dibutylbenzo[4,5]imidazo[2,1-a]isoquinoline (4h)

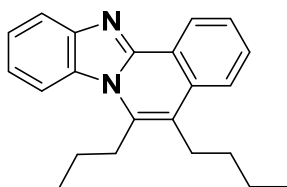

R<sub>f</sub> 0.23 (Hexane/EtOAc = 5/1). Yield = 66%, m = 63.0 mg. Pale yellow viscous gel. <sup>1</sup>H NMR (CDCl<sub>3</sub>, 399.78 MHz) δ 1.03-1.10 (m, 6H), 1.54-1.74 (m, 6H), 1.84-1.92 (m, 2H), 2.99 (t, *J* = 8.1 Hz, 2H), 3.41 (t, *J* = 8.2 Hz, 2H), 7.38 (td, *J* = 7.8, 1.1 Hz, 1H), 7.50 (t, *J* = 7.7 Hz, 1H), 7.65 (t, *J* = 7.6 Hz, 1H), 7.71 (td, *J* = 7.6, 1.4 Hz, 1H), 7.88 (d, *J* = 8.3 Hz, 1H), 7.96 (d, *J* = 8.4 Hz, 1H), 8.04 (d, *J* = 8.1 Hz, 1H), 8.93 (d, *J* = 7.8 Hz, 1H); <sup>13</sup>C NMR (CDCl<sub>3</sub>, 100.53 MHz) δ 13.95, 13.98, 22.67, 23.16, 27.16, 28.92, 30.25, 32.65, 114.33, 118.68, 119.90, 121.57, 122.72, 123.39, 123.96, 125.57, 126.99, 130.75, 131.55, 135.80, 144.20, 148.02; IR (ATR) 2956 m, 2927 w, 2870 w, 1630 w, 1523 m, 1452 m, 1375 w, 1337 m, 1282 m, 1254 w, 760 m, 734 s; MS *m/z* (relative intensity, %) 331 (25), 330 (M<sup>+</sup>, 97), 288 (20), 287 (78), 257 (24), 246 (20), 245 (100), 243 (12), 232 (15); HRMS Calcd for C<sub>23</sub>H<sub>27</sub>N<sub>2</sub>(M+H)<sup>+</sup>: 331.2169; Found: 331.2164.

#### 5,6-dipropylbenzo[4,5]imidazo[2,1-a]isoquinoline (4i)

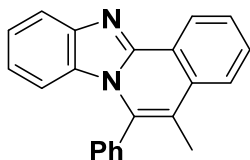

$R_f$  0.29 (Hexane/EtOAc = 3/1). Yield = 78%,  $m$  = 58.3 mg. Pale Yellow Solid.  $^1\text{H NMR}$  ( $\text{CDCl}_3$ , 399.78 MHz)  $\delta$  2.31 (s, 3H), 5.93 (dd,  $J$  = 9.6, 0.9 Hz, 1H), 6.91 (ddd,  $J$  = 8.7, 6.9, 0.5 Hz, 1H), 7.34 (ddd,  $J$  = 8.0, 7.3, 0.9 Hz, 1H), 7.78 (dd,  $J$  = 7.8, 1.8 Hz, 2H), 7.62-7.78 (m, 5H), 7.93 (td,  $J$  = 9.2, 1.4 Hz, 2H), 8.97 (dd,  $J$  = 8.2, 1.4 Hz, 1H);  $^{13}\text{C NMR}$  ( $\text{CDCl}_3$ , 100.53 MHz)  $\delta$  14.48, 113.80, 115.54, 119.36, 121.06, 123.02, 123.86, 124.02, 125.35, 127.64, 129.51, 129.74, 130.06, 130.20, 131.06, 132.30, 134.25, 134.48, 143.85, 147.48; IR (ATR) 3058 w, 1633 w, 1560 w, 1525 m, 1479 w, 1447 s, 1376 m, 1335 w, 1304 w, 1282 w, 1252 w, 1163 w, 1014 w, 910 w, 792 w, 758 s, 737 s, 702 s; MS (DI)  $m/z$  (relative intensity, %) 309 (24), 308 ( $\text{M}^+$ , 100), 307 (39), 306 (14), 305 (15), 147 (24); HRMS Calcd for  $\text{C}_{22}\text{H}_{17}\text{N}_2$  ( $\text{M}+\text{H}$ ) $^+$ : 309.1386; Found: 309.1379.

### 5,6-dipropylbenzo[4,5]imidazo[2,1-a]isoquinoline (6)

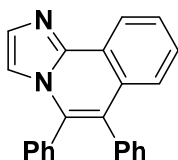

$R_f$  0.20 (Hexane/EtOAc/ $\text{CHCl}_3$  = 150/50/3). Yield = 81%,  $m$  = 67.5 mg. Pale Yellow Solid.  $^1\text{H NMR}$  ( $\text{CDCl}_3$ , 399.78 MHz)  $\delta$  7.19-7.21 (m, 3H), 7.23-7.35 (m, 6H), 7.40 (d,  $J$  = 8.2 Hz, 1H), 7.49 (t,  $J$  = 7.4 Hz, 1H), 7.56 (s, 1H), 7.66 (t,  $J$  = 7.4 Hz, 1H), 8.80 (brs, 1H);  $^{13}\text{C NMR}$  ( $\text{CDCl}_3$ , 100.53 MHz, quant.)  $\delta$  113.90, 123.14, 123.16, 124.42, 126.40, 127.26, 127.80, 128.01, 128.01, 128.01, 128.60, 128.60, 128.81, 130.16, 130.16, 130.56, 130.80, 131.38, 131.38, 133.34, 133.43, 135.88, 143.03; HRMS Calcd for  $\text{C}_{24}\text{H}_{19}\text{ClN}_2$  ( $\text{M}+\text{H}$ ) $^+$ : 321.1386; Found: 321.1340.

### 2,5,6-triphenylpyrazolo[5,1-a]isoquinoline (8)

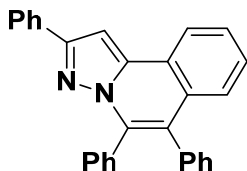

White solid,  $\text{Mp}$  = 186-188 °C.  $R_f$  = 0.50 (hexane/diethyl ether 3:1). Yield = 92 %,  $m$  = 92.0 mg.  $^1\text{H NMR}$  (399.78 MHz,  $\text{CDCl}_3$ ):  $\delta$  7.19-7.42 (m, 16H), 7.53-7.57 (m, 1H), 7.92 (d,  $J$  = 7.3 Hz, 2H), 8.20 (d,  $J$  = 7.8 Hz, 1H);  $^{13}\text{C NMR}$  (100.53 MHz,  $\text{CDCl}_3$ ):  $\delta$  94.7, 123.7, 123.9, 124.0, 126.5, 126.9, 127.2, 127.4, 127.6, 127.8, 128.1, 128.2, 128.2, 128.7, 130.1, 131.5, 131.8, 133.1, 133.5, 136.5, 136.5, 140.0, 152.3. IR (ATR): 3059 w, 1623 w, 1600 w, 1538 w, 1488 w, 1455 m, 1389 w, 1341 w, 1277 w, 1179 w, 1074 w, 1028 w, 952 w, 916 w, 863 w, 693 s. MS (EI $^+$ ): 397 (27), 396 ( $\text{M}^+$ , 97), 395 (100), 198 (11). HRMS (EI $^+$ ) Calcd for  $\text{C}_{29}\text{H}_{20}\text{N}_2$ : 396.1626; Found: 396.1631.

## 5,6-diphenylpyrrolo[2,1-a]isoquinoline (10)

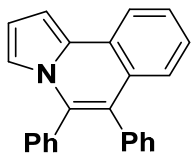

Yellow solid, Mp = 216-217 °C. R<sub>f</sub> = 0.60 (hexane/diethyl ether 3:1). Yield = 61 %, m = 48.7 mg. **<sup>1</sup>H NMR** (399.78 MHz, CDCl<sub>3</sub>): δ 6.65-6.67 (m, 1H), 6.86-6.87 (m, 1H), 7.08 (d, *J* = 4.1 Hz, 1H), 7.15-7.37 (m, 12H), 7.44-7.48 (m, 1H), 8.13 (d, *J* = 7.8 Hz, 1H); **<sup>13</sup>C NMR** (100.53 MHz, CDCl<sub>3</sub>): δ 100.3, 111.5, 115.1, 122.0, 122.5, 125.4, 125.9, 126.5, 126.9, 127.2, 128.0, 128.3, 128.5, 128.6, 130.5, 130.6, 131.7, 134.2, 134.4, 137.0. **IR** (ATR): 3056 w, 1601 w, 1484 w, 1444 w, 1371 w, 1335 w, 1261 w, 1148 w, 1109 w, 1071 w, 1025 w, 698 w. **MS** (EI<sup>+</sup>): 320 (25), 319 (M<sup>+</sup>, 100), 318 (66), 317 (19). **HRMS** (EI<sup>+</sup>) Calcd for C<sub>24</sub>H<sub>17</sub>N: 319.1361; Found: 319.1361.

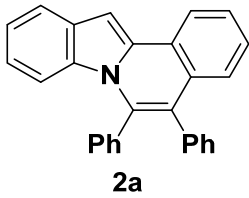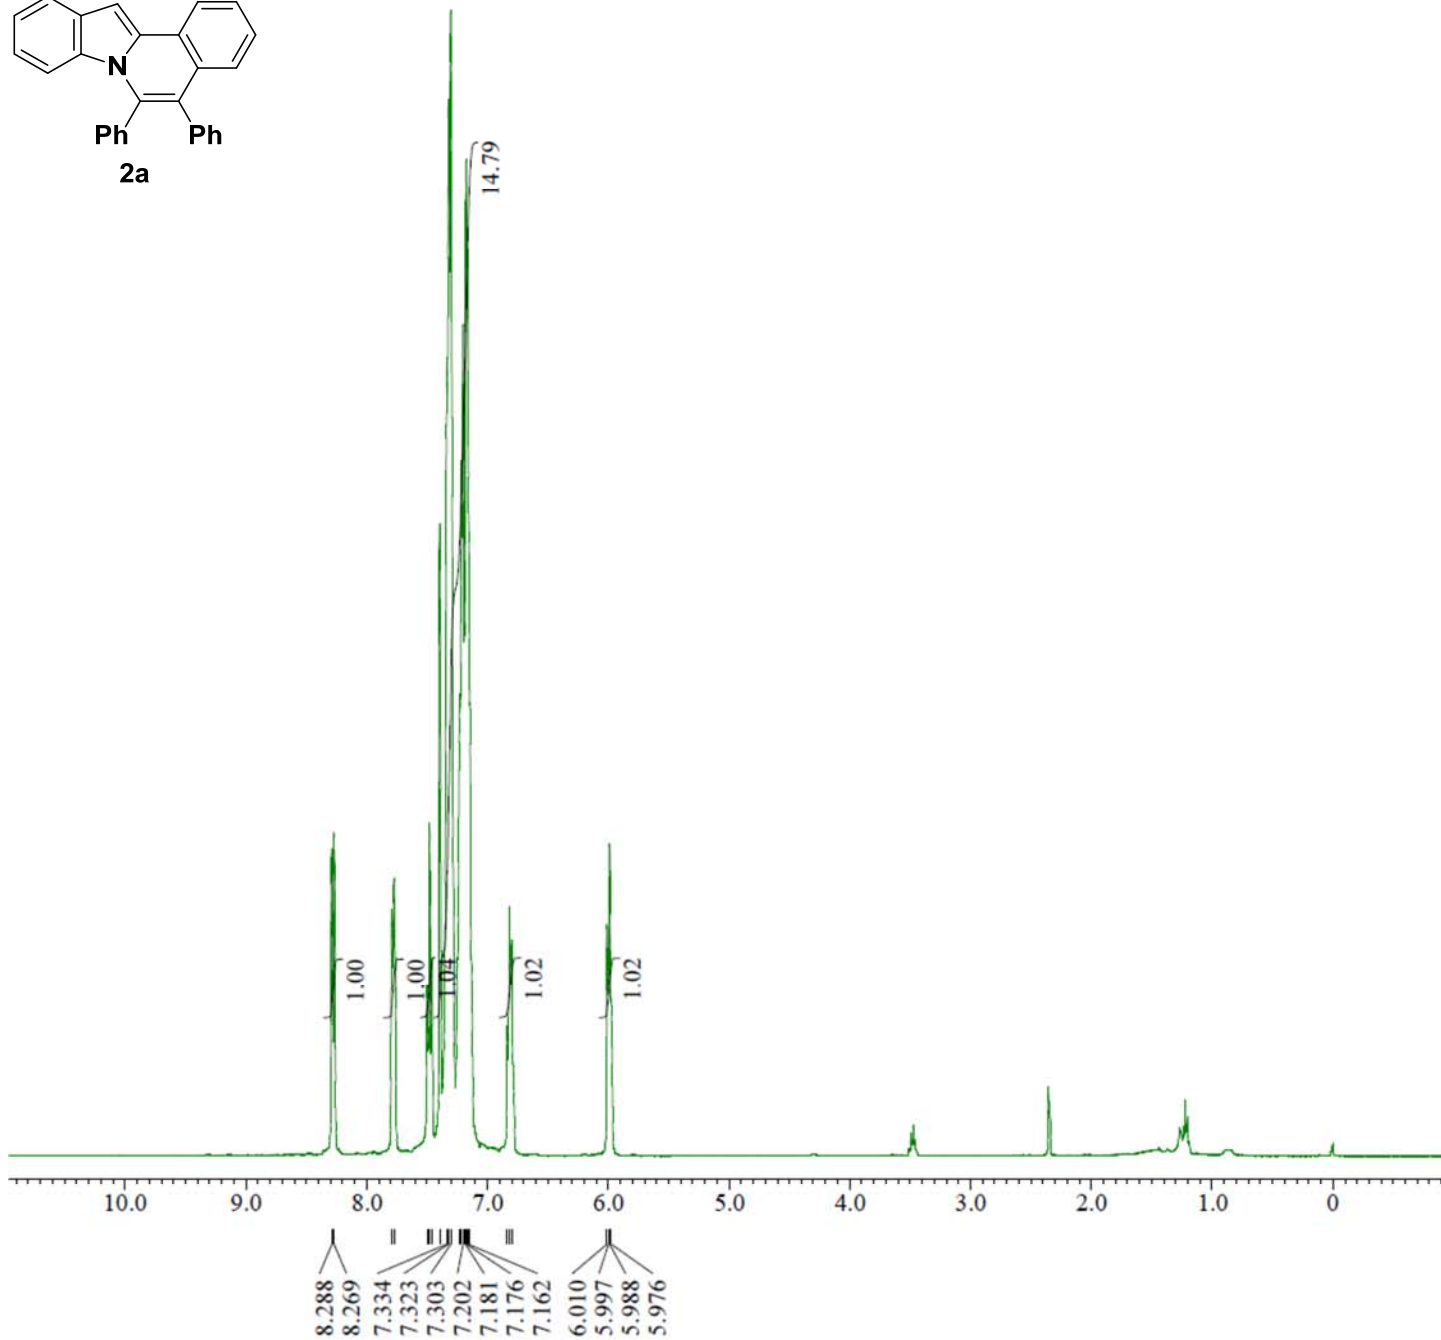

X : parts per Million : Proton

```

Filename      = AO-1123 GPC_Proton-2-1.jdf
Author       = delta
Experiment   = proton.jxp
Sample Id    = AO-1123 GPC
Solvent      = CHLOROFORM-D
Creation Time = 12-MAR-2018 19:40:48
Revision Time = 12-MAR-2018 21:09:54
Current Time  = 16-MAR-2018 19:12:49

Comment      = AO-1123 GPC
Data Format   = 1D COMPLEX
Dim Size     = 13107
Dim Title    = Proton
Dim Units    = [ppm]
Dimensions   = X
Site         = JNM-ECS400
Spectrometer = DELTA2_NMR

Field Strength = 9.389766[T] (400[MHz])
X_Acq_Duration = 2.18103808[s]
X_Domain      = 1H
X_Freq        = 399.78219838[MHz]
X_Offset      = 5[ppm]
X_Points      = 16384
X_Prescans    = 1
X_Resolution  = 0.45849727[Hz]
X_Sweep       = 7.51201923[kHz]
X_Sweep_Clip  = 6.00961538[kHz]
Irr_Domain    = Proton
Irr_Freq      = 399.78219838[MHz]
Irr_Offset    = 5[ppm]
Tri_Domain    = Proton
Tri_Freq      = 399.78219838[MHz]
Tri_Offset    = 5[ppm]
Clipped       = FALSE
Scans         = 8
Total_Scans   = 8

Relaxation_Delay = 5[s]
Recvr Gain       = 26
Temp_Get         = 460.0[dC]
X_90_Width      = 11.1[us]
X_Acq_Time      = 2.18103808[s]
X_Angle         = 45[deg]
X_Atn           = 1[dB]
X_Pulse         = 5.55[us]
Irr_Mode        = Off
Tri_Mode        = Off
Dante_Presat    = FALSE
Initial_Wait    = 1[s]
Repetition_Time = 7.18103808[s]

```

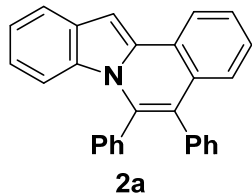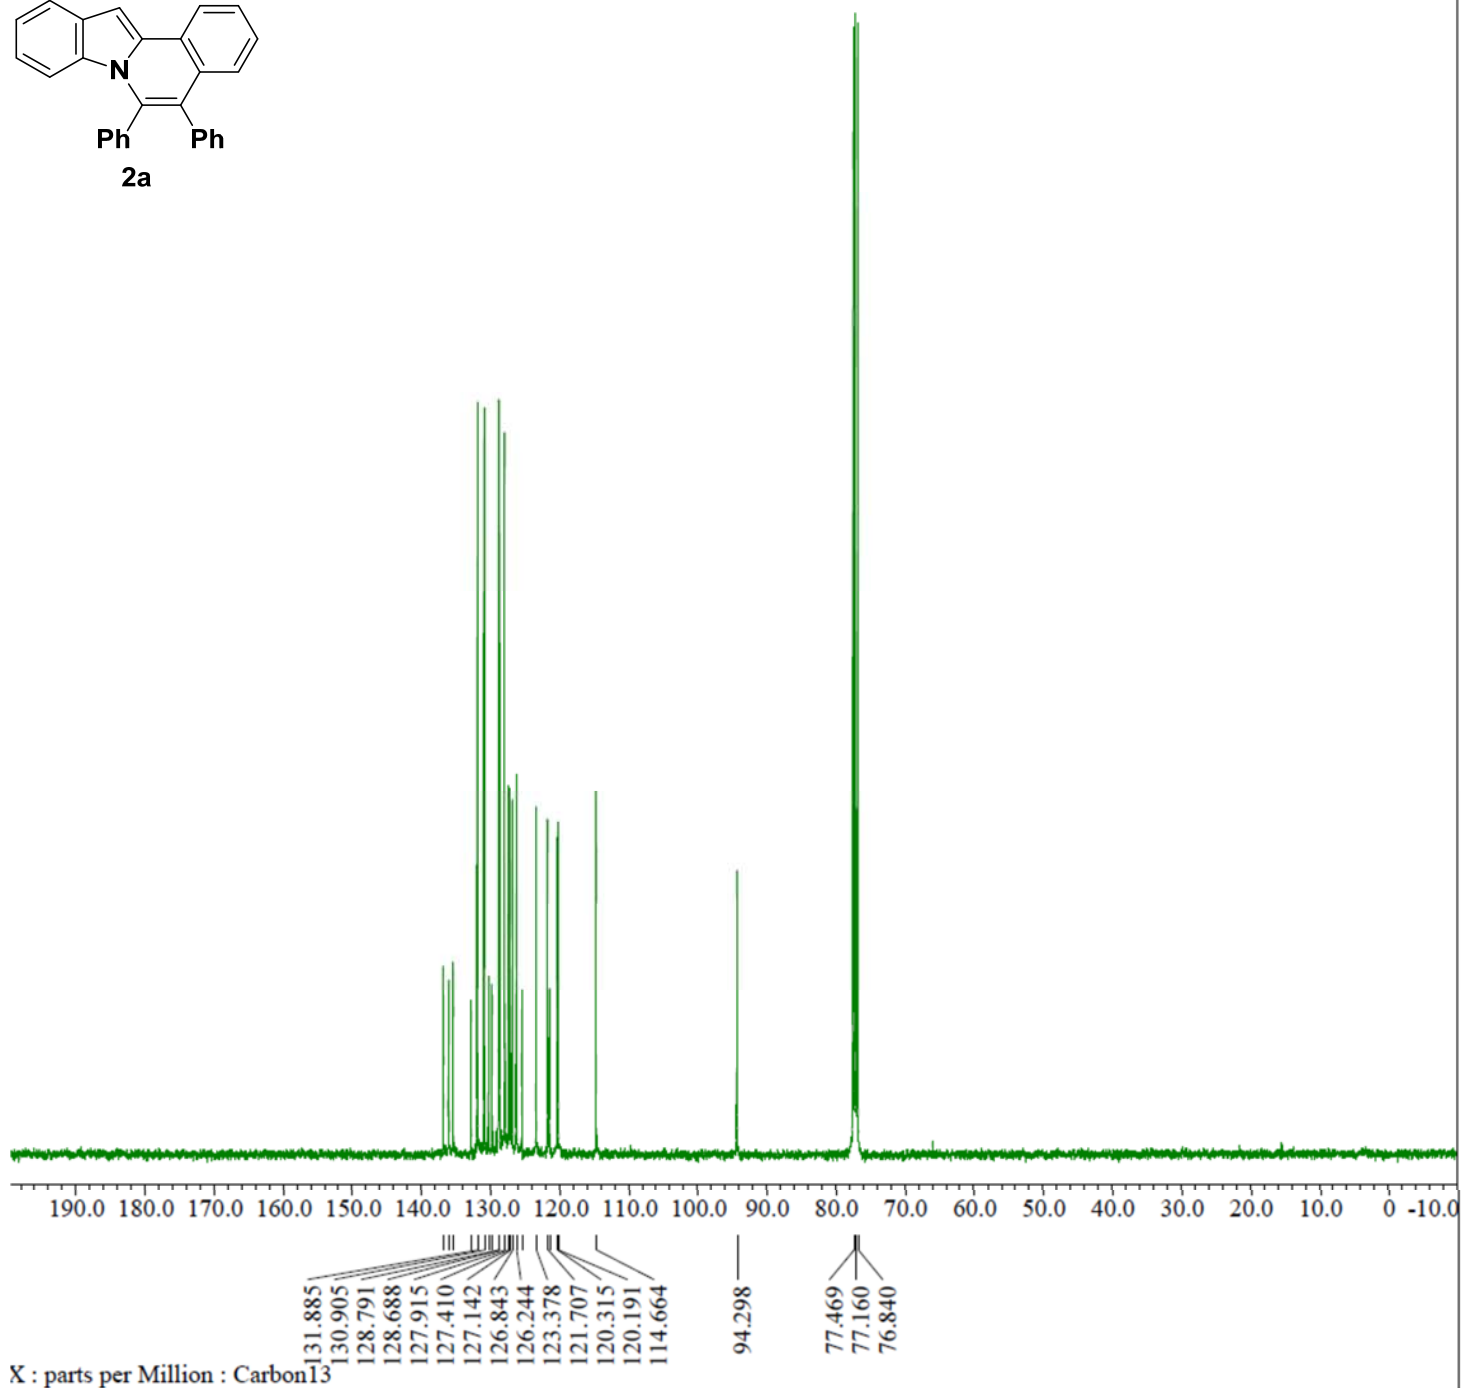

```

Filename      = AO-1123 GPC_Carbon-1-1.jc
Author       = delta
Experiment   = carbon.jxp
Sample Id    = AO-1123 GPC
Solvent      = CHLOROFORM-D
Creation Time = 13-MAR-2018 04:35:13
Revision Time = 13-MAR-2018 10:07:42
Current Time  = 16-MAR-2018 19:12:33

Comment      = AO-1123 GPC
Data Format   = 1D COMPLEX
Dim Size     = 26214
Dim Title    = Carbon13
Dim Units    = [ppm]
Dimensions   = X
Site         = JNM-ECS400
Spectrometer = DELTA2_NMR

Field Strength = 9.389766[T] (400[MHz])
X Acq Duration = 0.96468992[s]
X Domain      = 13C
X Freq        = 100.52530333[MHz]
X Offset      = 100[ppm]
X Points      = 32768
X Prescans    = 4
X Resolution  = 1.03660252[Hz]
X Sweep       = 33.9673913[kHz]
X Sweep Clipped = 27.17391304[kHz]
Irr Domain    = Proton
Irr Freq      = 399.78219838[MHz]
Irr Offset    = 5[ppm]
Clipped       = FALSE
Scans         = 1024
Total Scans   = 1024

Relaxation Delay = 2[s]
Recvr Gain       = 60
Temp Get        = 460.0[dC]
X 90 Width      = 12.6[us]
X Acq Time      = 0.96468992[s]
X Angle         = 30[deg]
X Atn          = 6[dB]
X Pulse         = 4.2[us]
Irr Atn Dec     = 20.776[dB]
Irr Atn Noe     = 20.776[dB]
Irr Noise       = WALTZ
Irr Pwidth      = 0.115[ms]
Decoupling      = TRUE
Initial Wait    = 1[s]
Noe             = TRUE
Noe Time        = 2[s]
Repetition Time = 2.96468992[s]

```

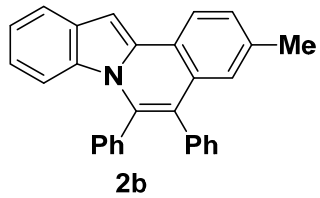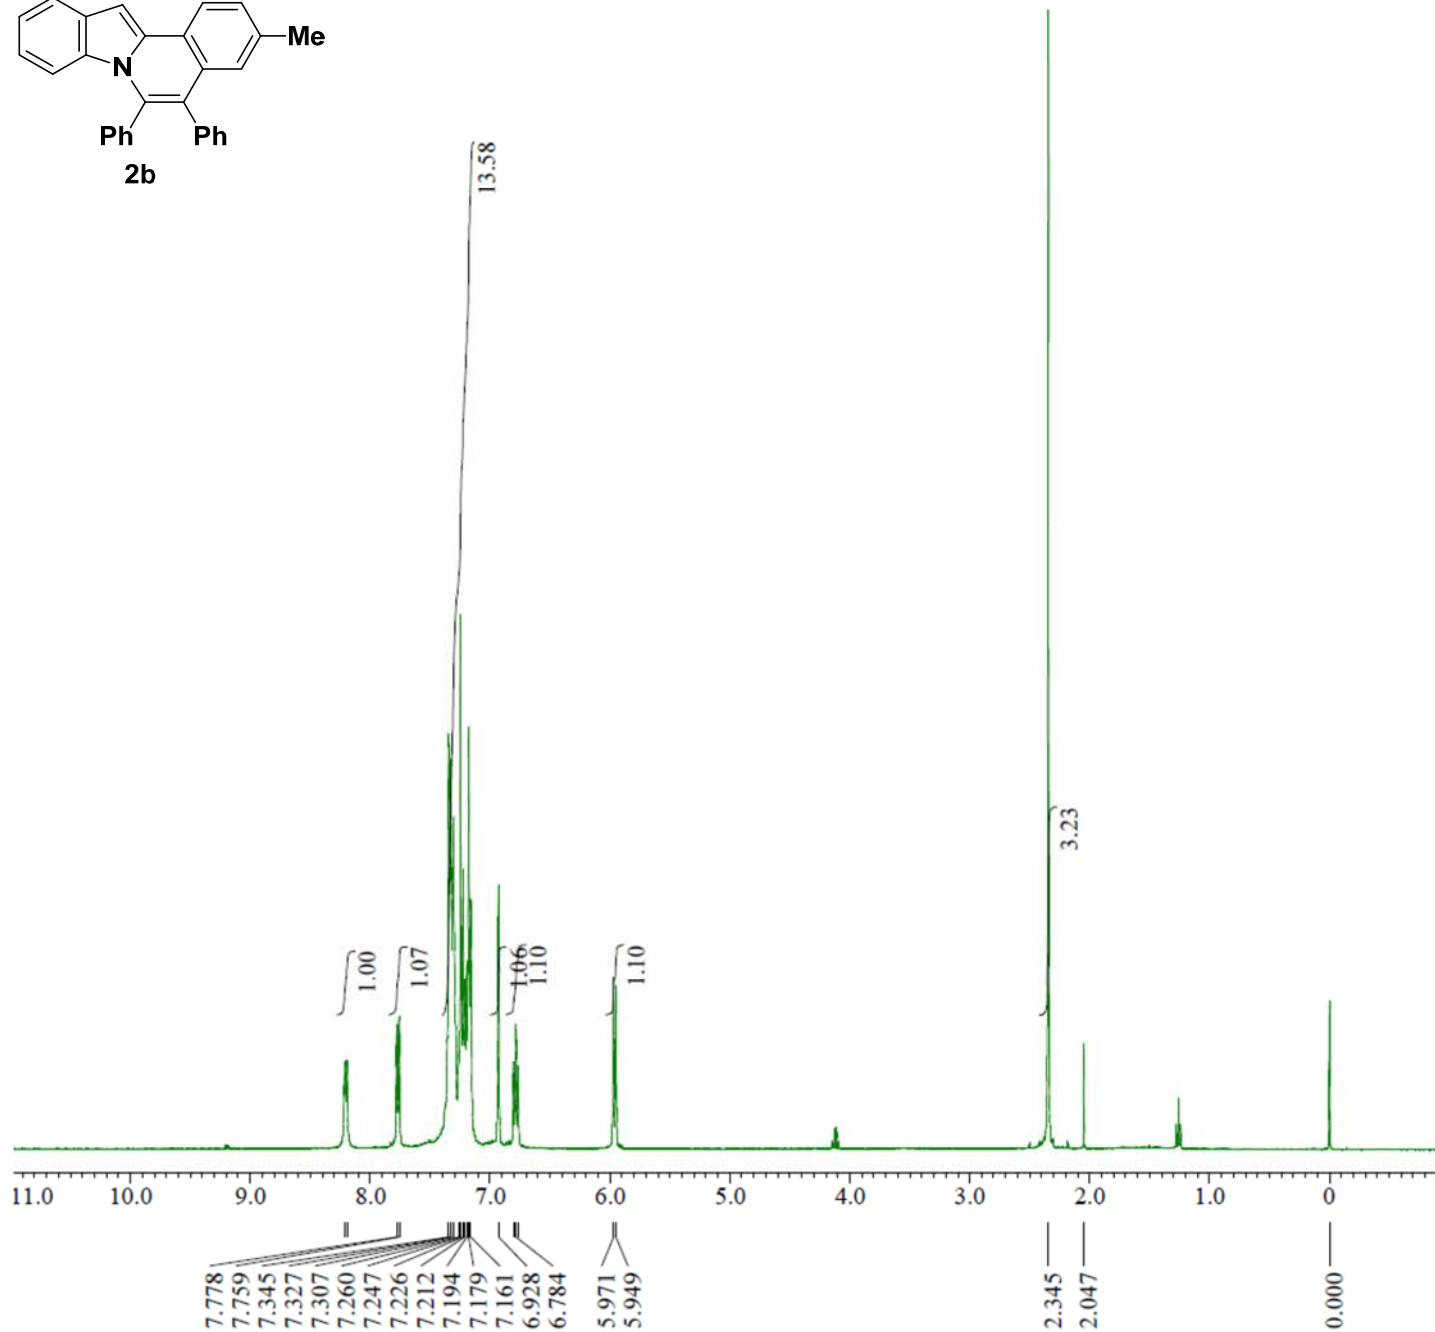

X : parts per Million : Proton

```

Filename      = AO-1163 GPC_Proton-2-1.jc
Author       = delta
Experiment   = proton.jxp
Sample_Id    = AO-1163 GPC
Solvent      = CHLOROFORM-D
Creation_Time = 26-FEB-2018 21:25:03
Revision_Time = 6-MAR-2018 12:42:07
Current_Time  = 16-MAR-2018 19:17:59

Comment      = AO-1163 GPC
Data_Format  = 1D COMPLEX
Dim_Size     = 13107
Dim_Title    = Proton
Dim_Units    = [ppm]
Dimensions   = X
Site         = JNM-ECS400
Spectrometer = DELTA2_NMR

Field_Strength = 9.389766[T] (400[MHz])
X_Acq_Duration = 2.18103808[s]
X_Domain       = 1H
X_Freq         = 399.78219838[MHz]
X_Offset       = 5[ppm]
X_Points       = 16384
X_Prescans     = 1
X_Resolution   = 0.45849727[Hz]
X_Sweep        = 7.51201923[kHz]
X_Sweep_Clippped = 6.00961538[kHz]
Irr_Domain     = Proton
Irr_Freq       = 399.78219838[MHz]
Irr_Offset     = 5[ppm]
Tri_Domain     = Proton
Tri_Freq       = 399.78219838[MHz]
Tri_Offset     = 5[ppm]
Clipped        = FALSE
Scans          = 8
Total_Scans    = 8

Relaxation_Delay = 5[s]
Recvr_Gain       = 30
Temp_Get         = 460.0[dC]
X_90_Width       = 11.1[us]
X_Acq_Time       = 2.18103808[s]
X_Angle          = 45[deg]
X_Atn           = 1[dB]
X_Pulse         = 5.55[us]
Irr_Mode         = Off
Tri_Mode         = Off
Dante_Presat    = FALSE
Initial_Wait     = 1[s]
Repetition_Time = 7.18103808[s]

```



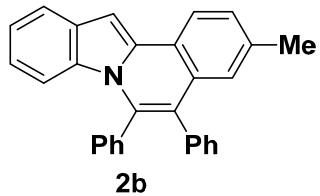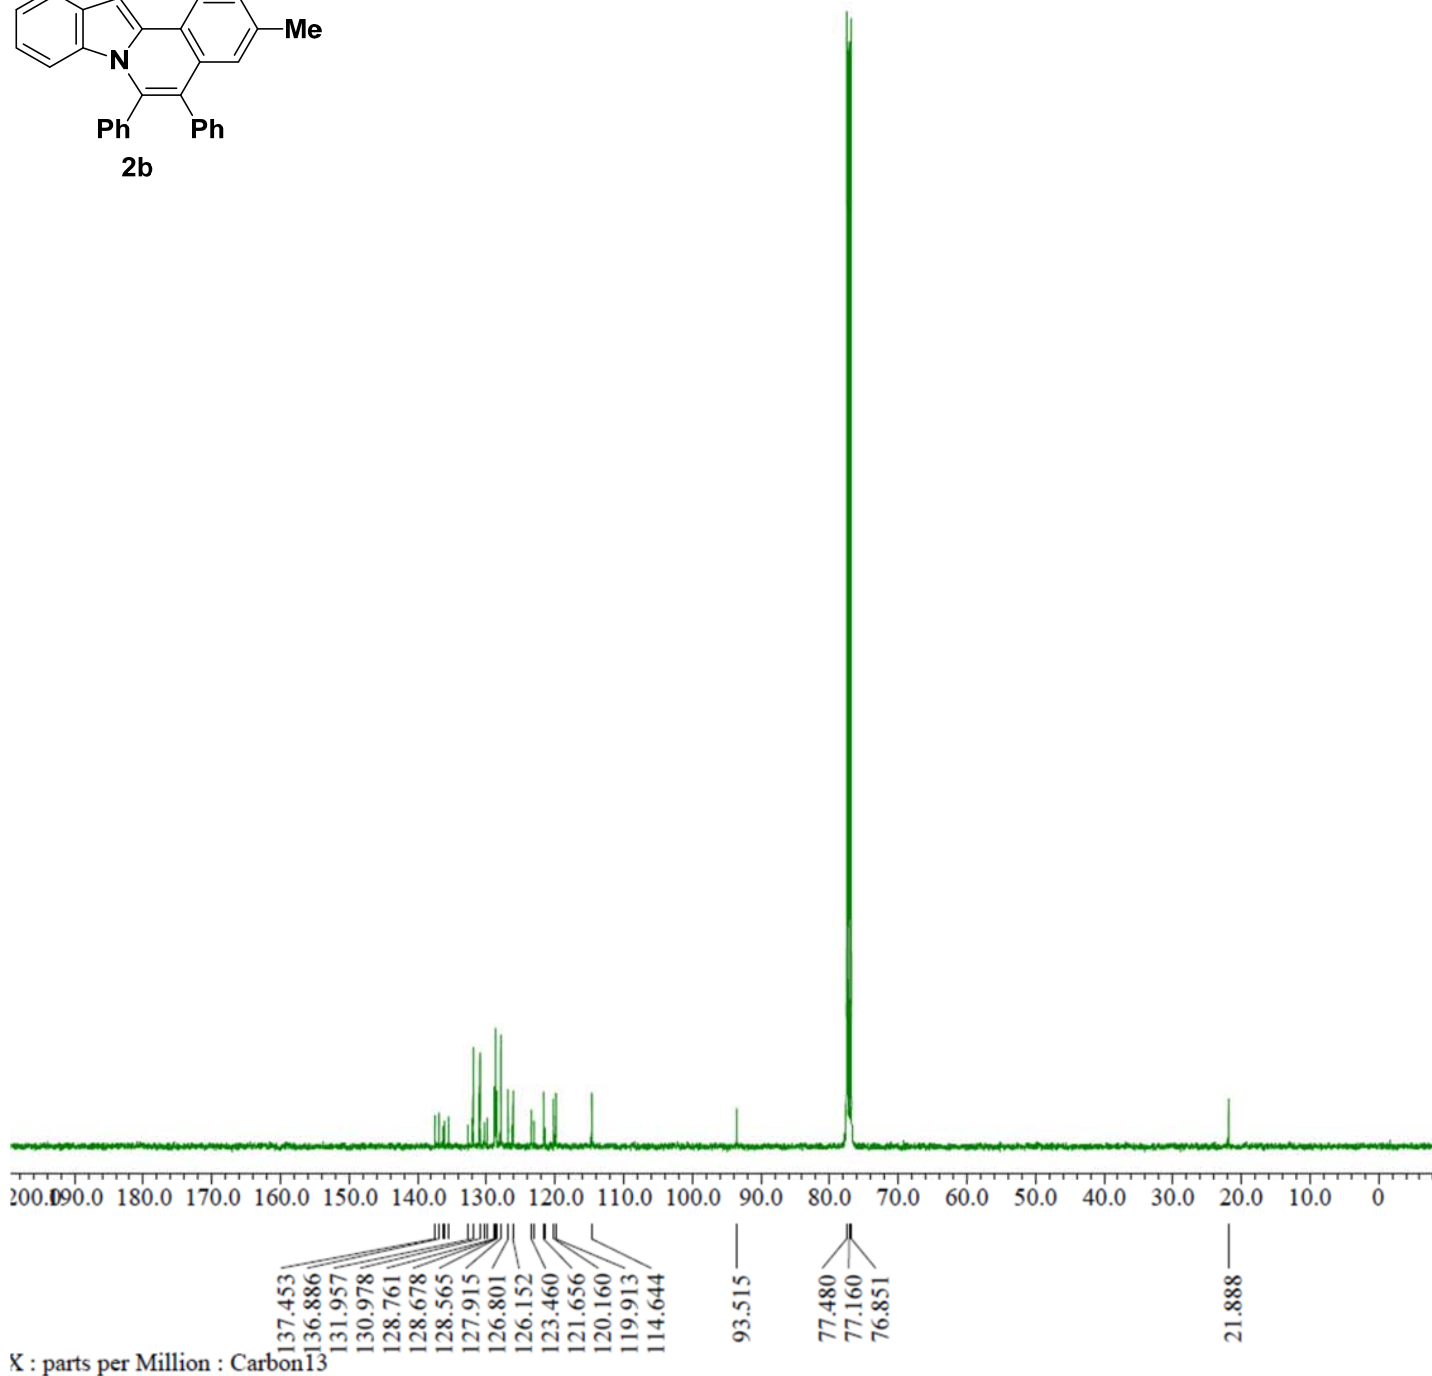

```

Filename      = AO-1163 GPC_Carbon-1-1.jc
Author       = delta
Experiment   = carbon.jxp
Sample_Id    = AO-1163 GPC
Solvent      = CHLOROFORM-D
Creation Time = 27-FEB-2018 09:04:29
Revision Time = 27-FEB-2018 13:03:14
Current_Time  = 16-MAR-2018 19:17:45

Comment      = AO-1163 GPC
Data Format   = 1D COMPLEX
Dim_Size     = 26214
Dim_Title    = Carbon13
Dim_Units    = [ppm]
Dimensions   = X
Site         = JNM-ECS400
Spectrometer = DELTA2_NMR

Field Strength = 9.389766[T] (400[MHz])
X_Acq_Duration = 0.96468992[s]
X_Domain      = 13C
X_Freq        = 100.52530333[MHz]
X_Offset      = 100[ppm]
X_Points      = 32768
X_Prescans    = 4
X_Resolution  = 1.03660252[Hz]
X_Sweep       = 33.9673913[kHz]
X_Sweep_Clippped = 27.17391304[kHz]
Irr_Domain    = Proton
Irr_Freq      = 399.78219838[MHz]
Irr_Offset    = 5[ppm]
Clipped       = FALSE
Scans         = 1024
Total_Scans   = 1024

Relaxation_Delay = 2[s]
Recvr_Gain       = 60
Temp_Get         = 460.0[dC]
X_90_Width      = 12.6[us]
X_Acq_Time      = 0.96468992[s]
X_Angle         = 30[deg]
X_Atn           = 6[dB]
X_Pulse         = 4.2[us]
Irr_Atn_Dec     = 20.776[dB]
Irr_Atn_No     = 20.776[dB]
Irr_Noise       = WALTZ
Irr_Pwidth      = 0.115[ms]
Decoupling      = TRUE
Initial_Wait    = 1[s]
Noe              = TRUE
Noe_Time        = 2[s]
Repetition_Time = 2.96468992[s]

```

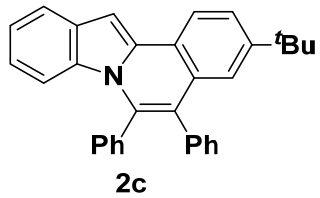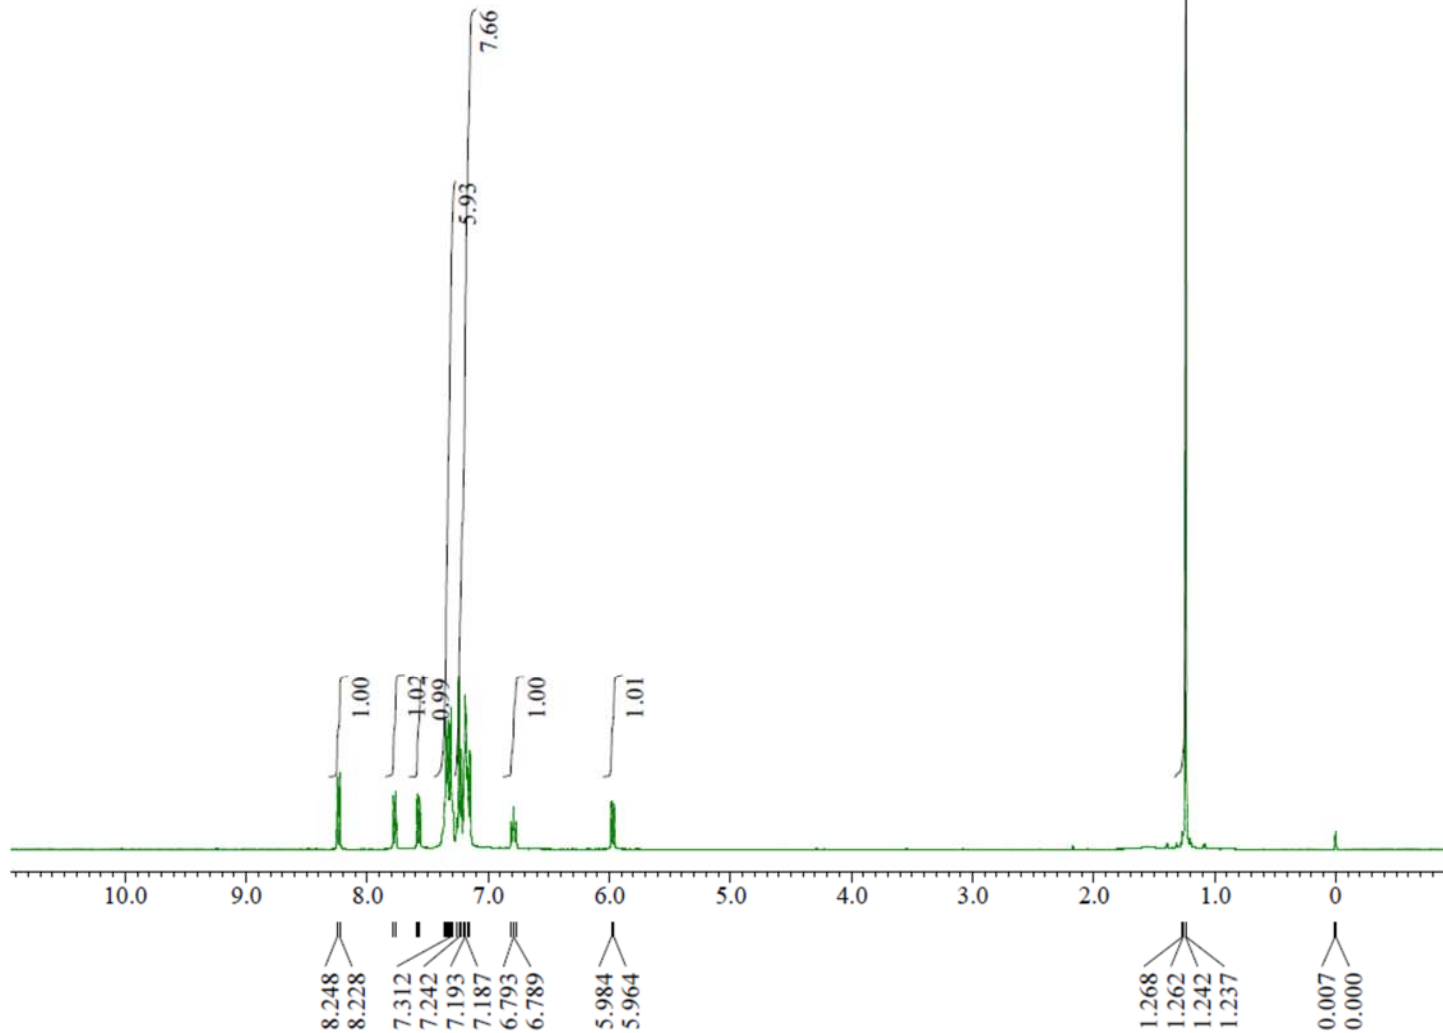

X : parts per Million : Proton

```

Filename      = AO-1176 GPC_Proton-2-1.jdf
Author       = delta
Experiment   = proton.jxp
Sample Id    = AO-1176 GPC
Solvent      = CHLOROFORM-D
Creation Time = 6-MAR-2018 10:20:07
Revision Time = 6-MAR-2018 12:47:11
Current_Time = 16-MAR-2018 19:19:37

Comment      = AO-1176 GPC
Data Format   = 1D COMPLEX
Dim_Size     = 13107
Dim_Title    = Proton
Dim_Units    = [ppm]
Dimensions   = X
Site         = JNM-ECS400
Spectrometer = DELTA2_NMR

Field Strength = 9.389766[T] (400[MHz])
X_Acq_Duration = 2.18103808[s]
X_Domain      = 1H
X_Freq        = 399.78219838[MHz]
X_Offset      = 5[ppm]
X_Points      = 16384
X_Prescans    = 1
X_Resolution  = 0.45849727[Hz]
X_Sweep       = 7.51201923[kHz]
X_Sweep_Clip  = 6.00961538[kHz]
Irr_Domain    = Proton
Irr_Freq      = 399.78219838[MHz]
Irr_Offset    = 5[ppm]
Tri_Domain    = Proton
Tri_Freq      = 399.78219838[MHz]
Tri_Offset    = 5[ppm]
Clipped       = FALSE
Scans         = 8
Total_Scans   = 8

Relaxation_Delay = 5[s]
Recvr Gain       = 30
Temp_Get         = 460.0[dC]
X_90_Width      = 11.1[us]
X_Acq_Time      = 2.18103808[s]
X_Angle         = 45[deg]
X_Atn           = 1[dB]
X_Pulse         = 5.55[us]
Irr_Mode        = Off
Tri_Mode        = Off
Dante_Presat    = FALSE
Initial_Wait    = 1[s]
Repetition_Time = 7.18103808[s]

```

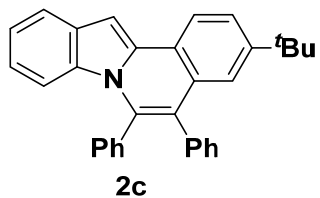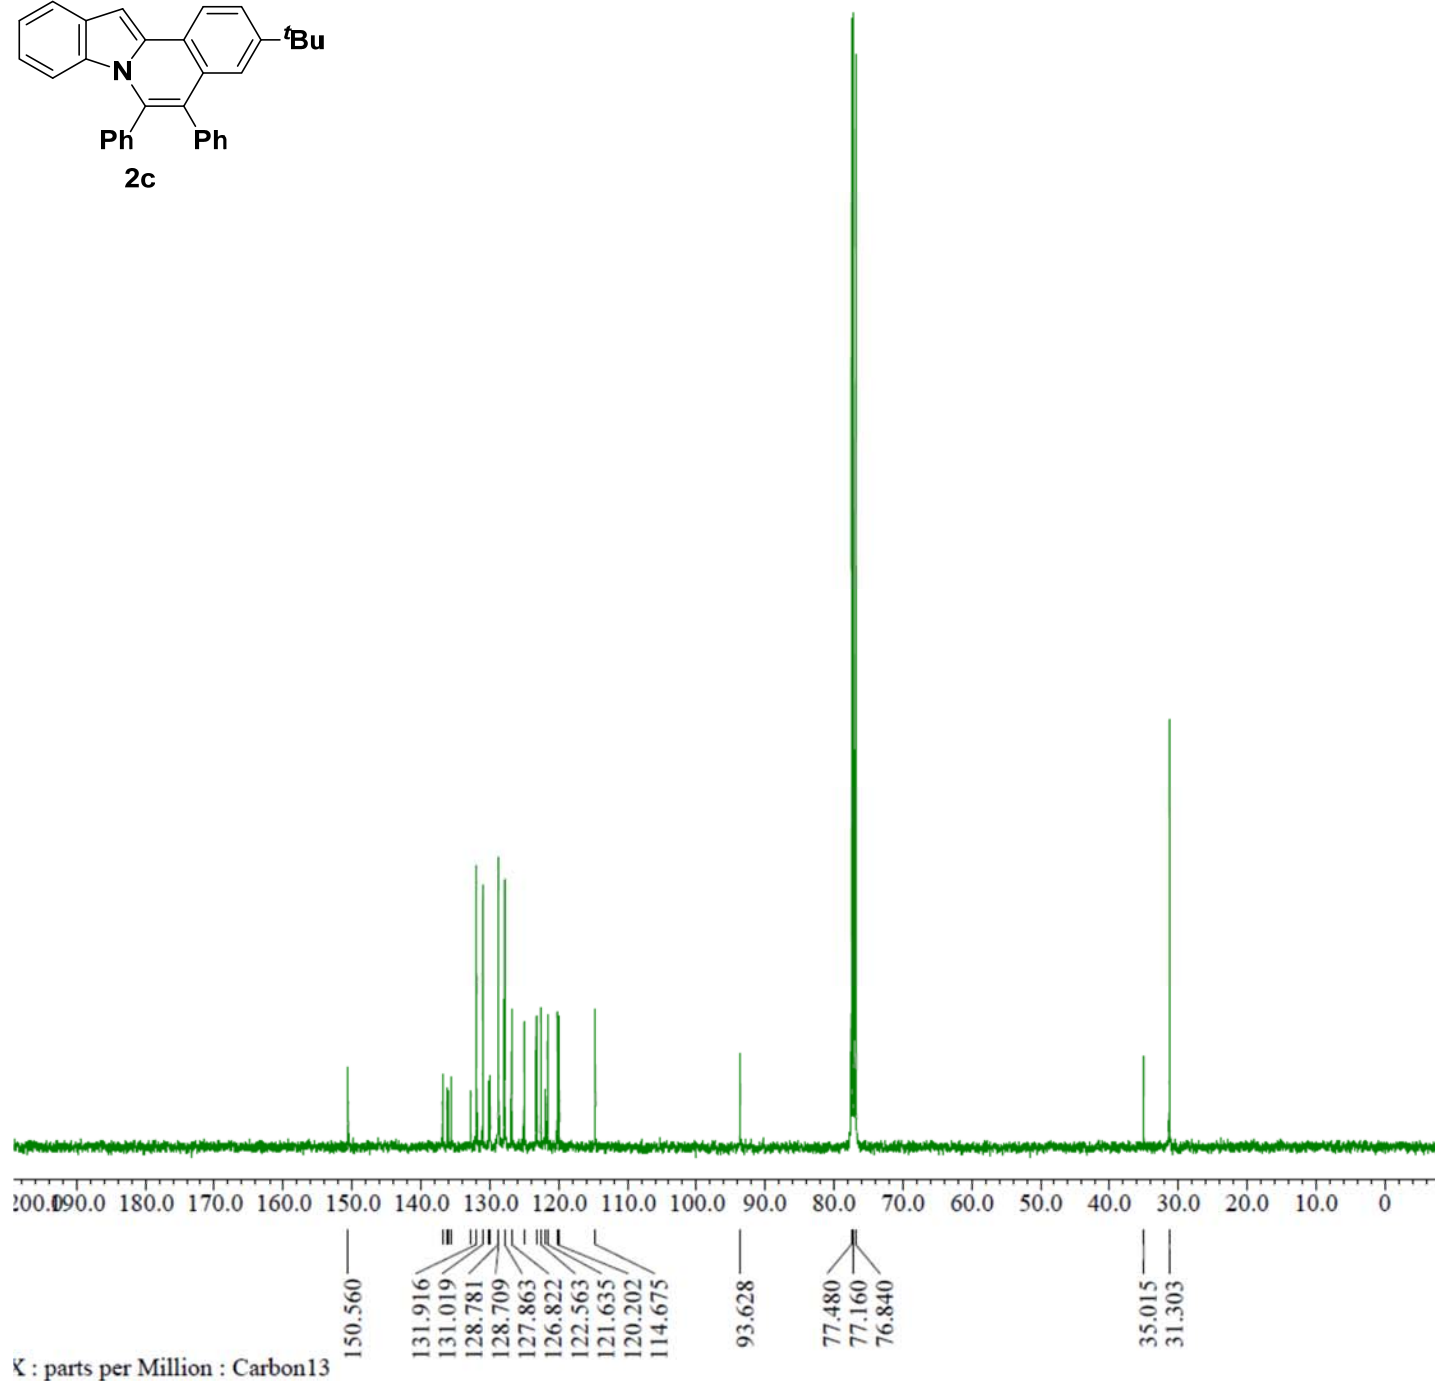

```

Filename      = AO-1176 GPC_Carbon-1-1.jdf
Author       = delta
Experiment   = carbon.jxp
Sample_Id    = AO-1176 GPC
Solvent      = CHLOROFORM-D
Creation Time = 6-MAR-2018 04:05:16
Revision Time = 6-MAR-2018 12:47:55
Current Time  = 16-MAR-2018 19:19:19

Comment      = AO-1176 GPC
Data Format   = 1D COMPLEX
Dim_Size     = 26214
Dim_Title    = Carbon13
Dim_Units    = [ppm]
Dimensions   = X
Site         = JNM-ECS400
Spectrometer = DELTA2_NMR

Field Strength = 9.389766[T] (400[MHz])
X_Acq_Duration = 0.96468992[s]
X_Domain      = 13C
X_Freq        = 100.52530333[MHz]
X_Offset      = 100[ppm]
X_Points      = 32768
X_Prescans    = 4
X_Resolution  = 1.03660252[Hz]
X_Sweep       = 33.9673913[kHz]
X_Sweep_Clipped = 27.17391304[kHz]
Irr_Domain    = Proton
Irr_Freq      = 399.78219838[MHz]
Irr_Offset    = 5[ppm]
Clipped       = FALSE
Scans         = 1024
Total_Scans   = 1024

Relaxation_Delay = 2[s]
Recvr_Gain       = 60
Temp_Get         = 460.0[dC]
X_90_Width      = 12.6[us]
X_Acq_Time      = 0.96468992[s]
X_Angle         = 30[deg]
X_Atn           = 6[dB]
X_Pulse         = 4.2[us]
Irr_Atn_Dec     = 20.776[dB]
Irr_Atn_Noise  = 20.776[dB]
Irr_Noise       = WALTZ
Irr_Pwidth      = 0.115[ms]
Decoupling      = TRUE
Initial_Wait    = 1[s]
Noe              = TRUE
Noe_Time        = 2[s]
Repetition_Time = 2.96468992[s]

```

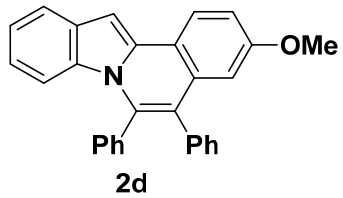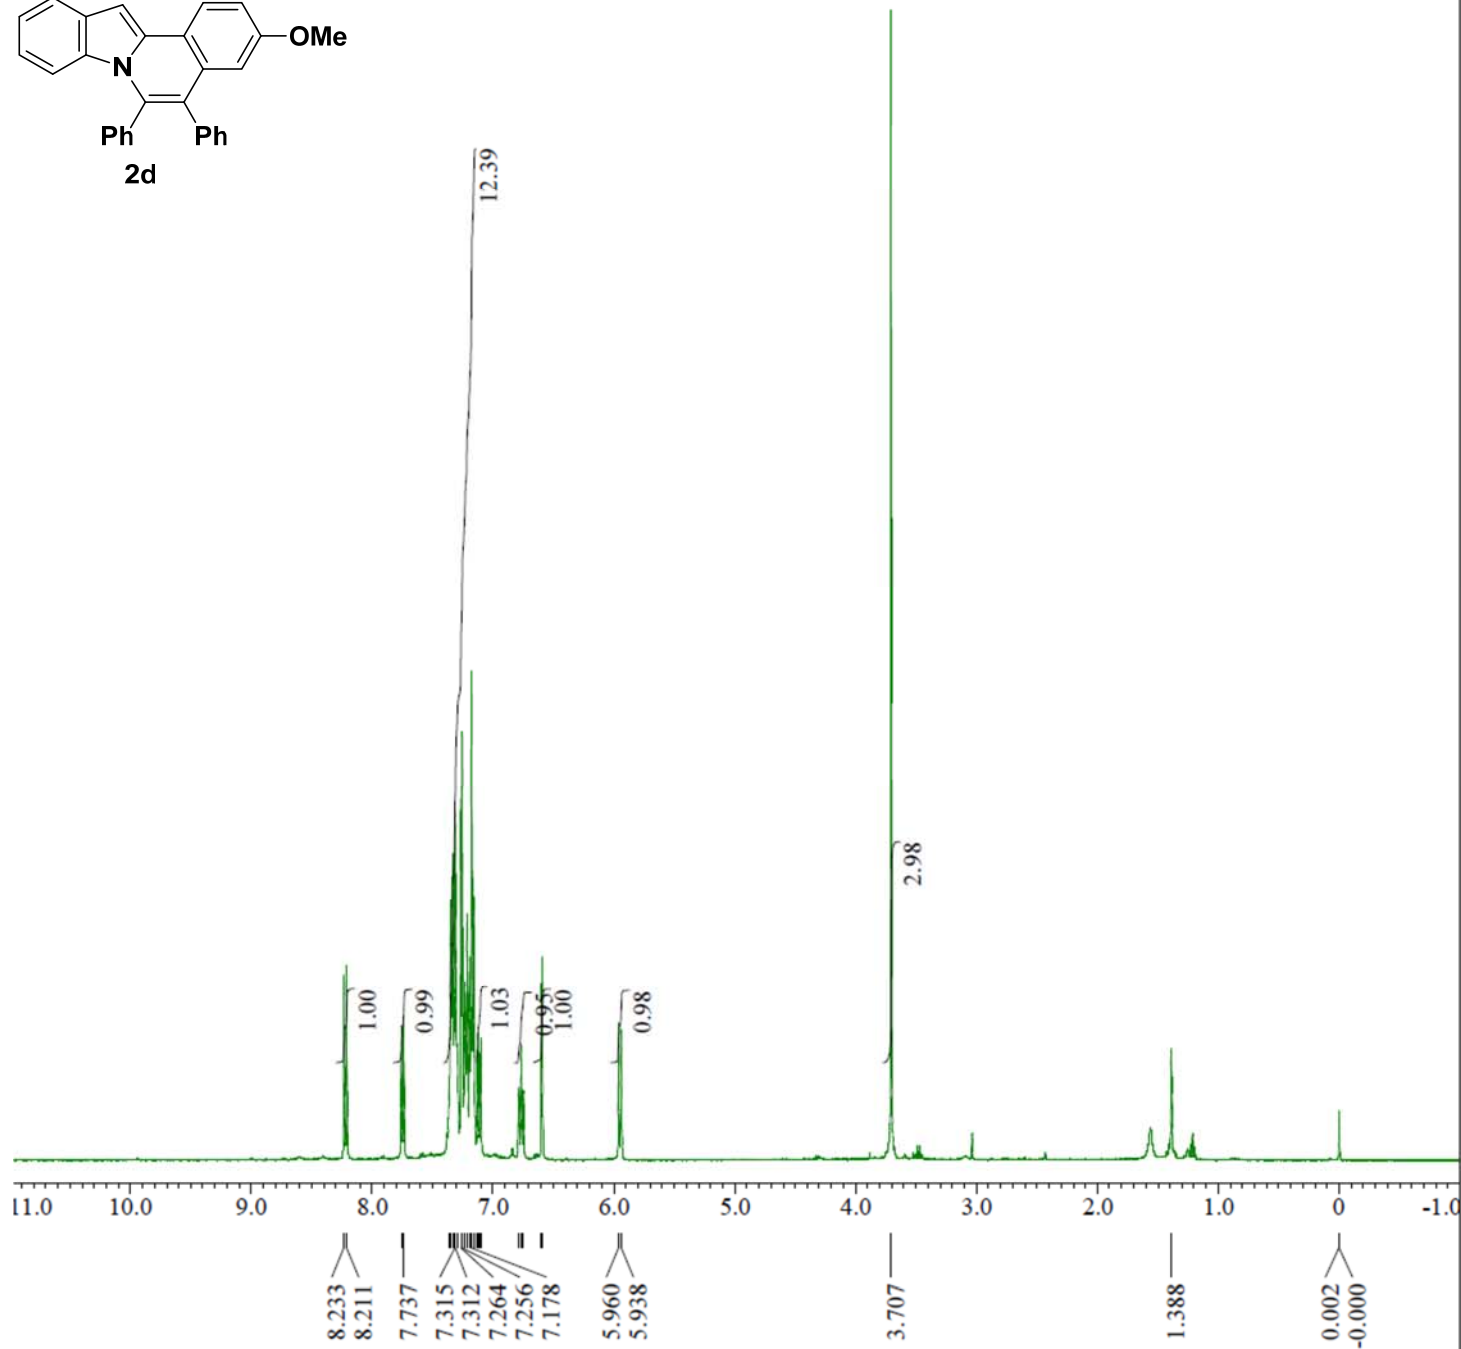

X : parts per Million : Proton

```

Filename      = AO-1131 GPC_Proton-1-1.jdf
Author       = delta
Experiment   = proton.jxp
Sample Id    = AO-1131 GPC
Solvent      = CHLOROFORM-D
Creation Time = 21-DEC-2017 15:45:40
Revision Time = 6-MAR-2018 12:51:15
Current Time  = 16-MAR-2018 19:13:27

Comment      = AO-1131 GPC
Data Format   = 1D COMPLEX
Dim Size     = 13107
Dim Title    = Proton
Dim Units    = [ppm]
Dimensions   = X
Site         = JNM-ECS400
Spectrometer = DELTA2_NMR

Field Strength = 9.389766[T] (400[MHz])
X Acq_Duration = 2.18365952[s]
X Domain      = 1H
X Freq        = 399.78219838[MHz]
X Offset      = 5[ppm]
X Points      = 16384
X Prescans    = 1
X Resolution  = 0.45794685[Hz]
X Sweep       = 7.5030012[kHz]
X Sweep_Clip = 6.00240096[kHz]
Irr Domain    = Proton
Irr Freq      = 399.78219838[MHz]
Irr Offset    = 5[ppm]
Tri Domain    = Proton
Tri Freq      = 399.78219838[MHz]
Tri Offset    = 5[ppm]
Clipped       = FALSE
Scans         = 8
Total_Scans   = 8

Relaxation_Delay = 5[s]
Recvr Gain       = 44
Temp Get         = 17.9[dC]
X 90_Width      = 11.1[us]
X Acq_Time       = 2.18365952[s]
X Angle         = 45[deg]
X Atn           = 1[dB]
X Pulse         = 5.55[us]
Irr Mode        = Off
Tri Mode        = Off
Dante Presat    = FALSE
Initial Wait    = 1[s]
Repetition Time = 7.18365952[s]

```

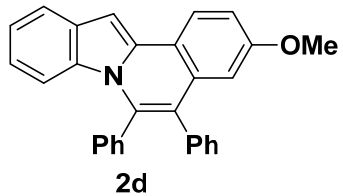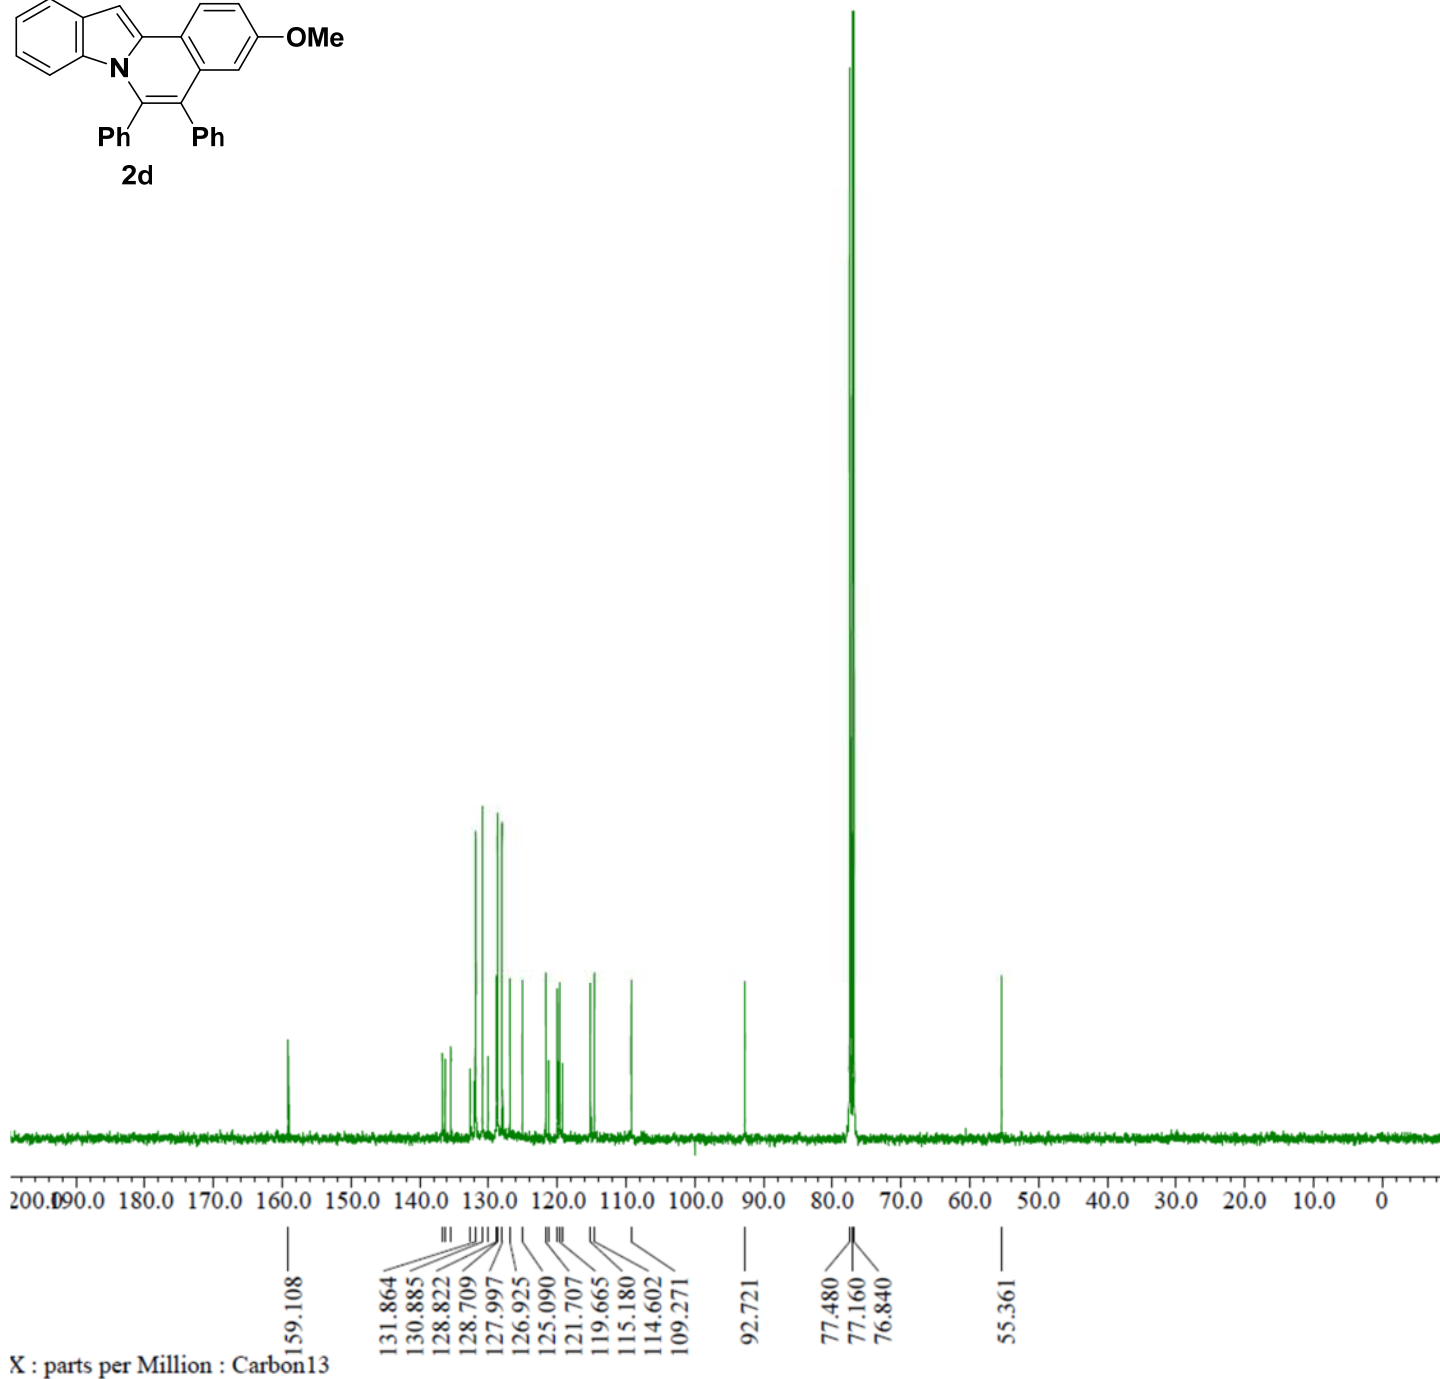

```

Filename      = AO-1131 GPC_Carbon-1-1.jdf
Author       = delta
Experiment   = carbon.jxp
Sample Id    = AO-1131 GPC
Solvent      = CHLOROFORM-D
Creation Time = 6-MAR-2018 02:05:35
Revision Time = 6-MAR-2018 12:49:38
Current Time  = 16-MAR-2018 19:13:12

Comment      = AO-1131 GPC
Data Format   = 1D COMPLEX
Dim Size     = 26214
Dim Title    = Carbon13
Dim Units    = [ppm]
Dimensions   = X
Site         = JNM-ECS400
Spectrometer = DELTA2_NMR

Field Strength = 9.389766[T] (400[MHz])
X_Acq_Duration = 0.96468992[s]
X_Domain       = 13C
X_Freq         = 100.52530333[MHz]
X_Offset       = 100[ppm]
X_Points       = 32768
X_Prescans     = 4
X_Resolution   = 1.03660252[Hz]
X_Sweep        = 33.9673913[kHz]
X_Sweep_Clippped = 27.17391304[kHz]
Irr_Domain     = Proton
Irr_Freq       = 399.78219838[MHz]
Irr_Offset     = 5[ppm]
Clipped        = FALSE
Scans          = 1024
Total_Scans    = 1024

Relaxation_Delay = 2[s]
Recvr Gain       = 60
Temp_Get         = 460.0[dC]
X_90_Width      = 12.6[us]
X_Acq_Time      = 0.96468992[s]
X_Angle         = 30[deg]
X_Atn           = 6[dB]
X_Pulse         = 4.2[us]
Irr_Atn_Dec     = 20.776[dB]
Irr_Atn_No     = 20.776[dB]
Irr_Noise       = WALTZ
Irr_Pwidth      = 0.115[ms]
Decoupling      = TRUE
Initial_Wait    = 1[s]
Noe              = TRUE
Noe Time        = 2[s]
Repitition_Time = 2.96468992[s]

```

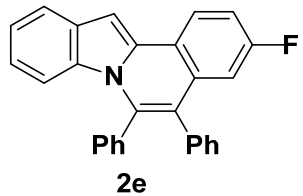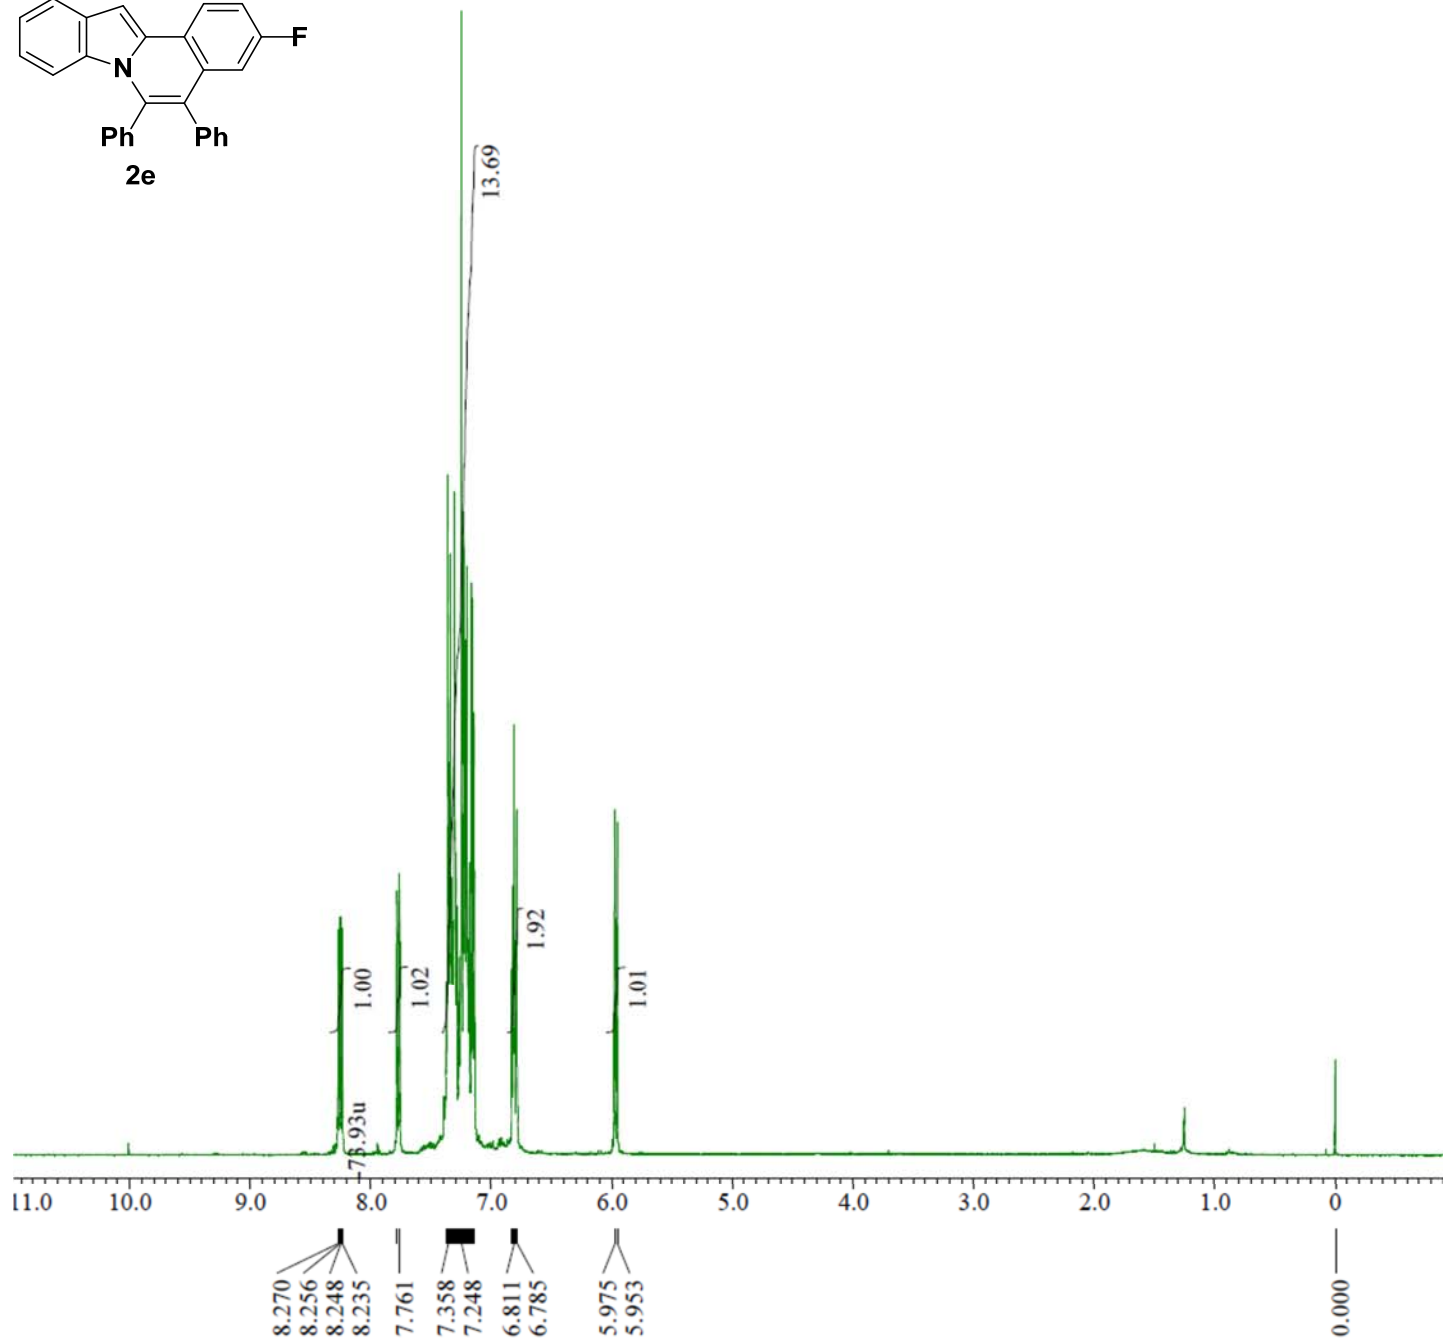

X : parts per Million : Proton

```

Filename      = AO-1134 GPC_Proton-3-1.jdf
Author        = delta
Experiment    = proton.jxp
Sample Id     = AO-1134 GPC
Solvent       = CHLOROFORM-D
Creation Time  = 22-FEB-2018 18:23:24
Revision Time  = 6-MAR-2018 12:54:30
Current Time   = 16-MAR-2018 19:13:52

Comment       = AO-1134 GPC
Data Format    = 1D COMPLEX
Dim Size      = 13107
Dim Title     = Proton
Dim Units     = [ppm]
Dimensions    = X
Site          = JNM-ECS400
Spectrometer  = DELTA2_NMR

Field Strength = 9.389766[T] (400[MHz])
X_Acq_Duration = 2.18103808[s]
X_Domain      = 1H
X_Freq        = 399.78219838[MHz]
X_Offset      = 5[ppm]
X_Points      = 16384
X_Prescans    = 1
X_Resolution  = 0.45849727[Hz]
X_Sweep       = 7.51201923[kHz]
X_Sweep_Clip  = 6.00961538[kHz]
Irr_Domain    = Proton
Irr_Freq      = 399.78219838[MHz]
Irr_Offset    = 5[ppm]
Tri_Domain    = Proton
Tri_Freq      = 399.78219838[MHz]
Tri_Offset    = 5[ppm]
Clipped       = FALSE
Scans         = 8
Total_Scans   = 8

Relaxation_Delay = 5[s]
Recvr Gain      = 30
Temp_Get        = 460.0[dC]
X_90_Width     = 11.1[us]
X_Acq_Time     = 2.18103808[s]
X_Angle        = 45[deg]
X_Atn          = 1[dB]
X_Pulse        = 5.55[us]
Irr_Mode       = Off
Tri_Mode       = Off
DanTe Presat   = FALSE
Initial Wait   = 1[s]
Repetition_Time = 7.18103808[s]

```

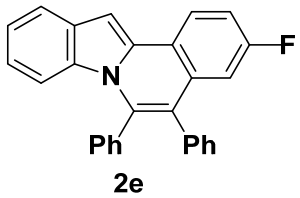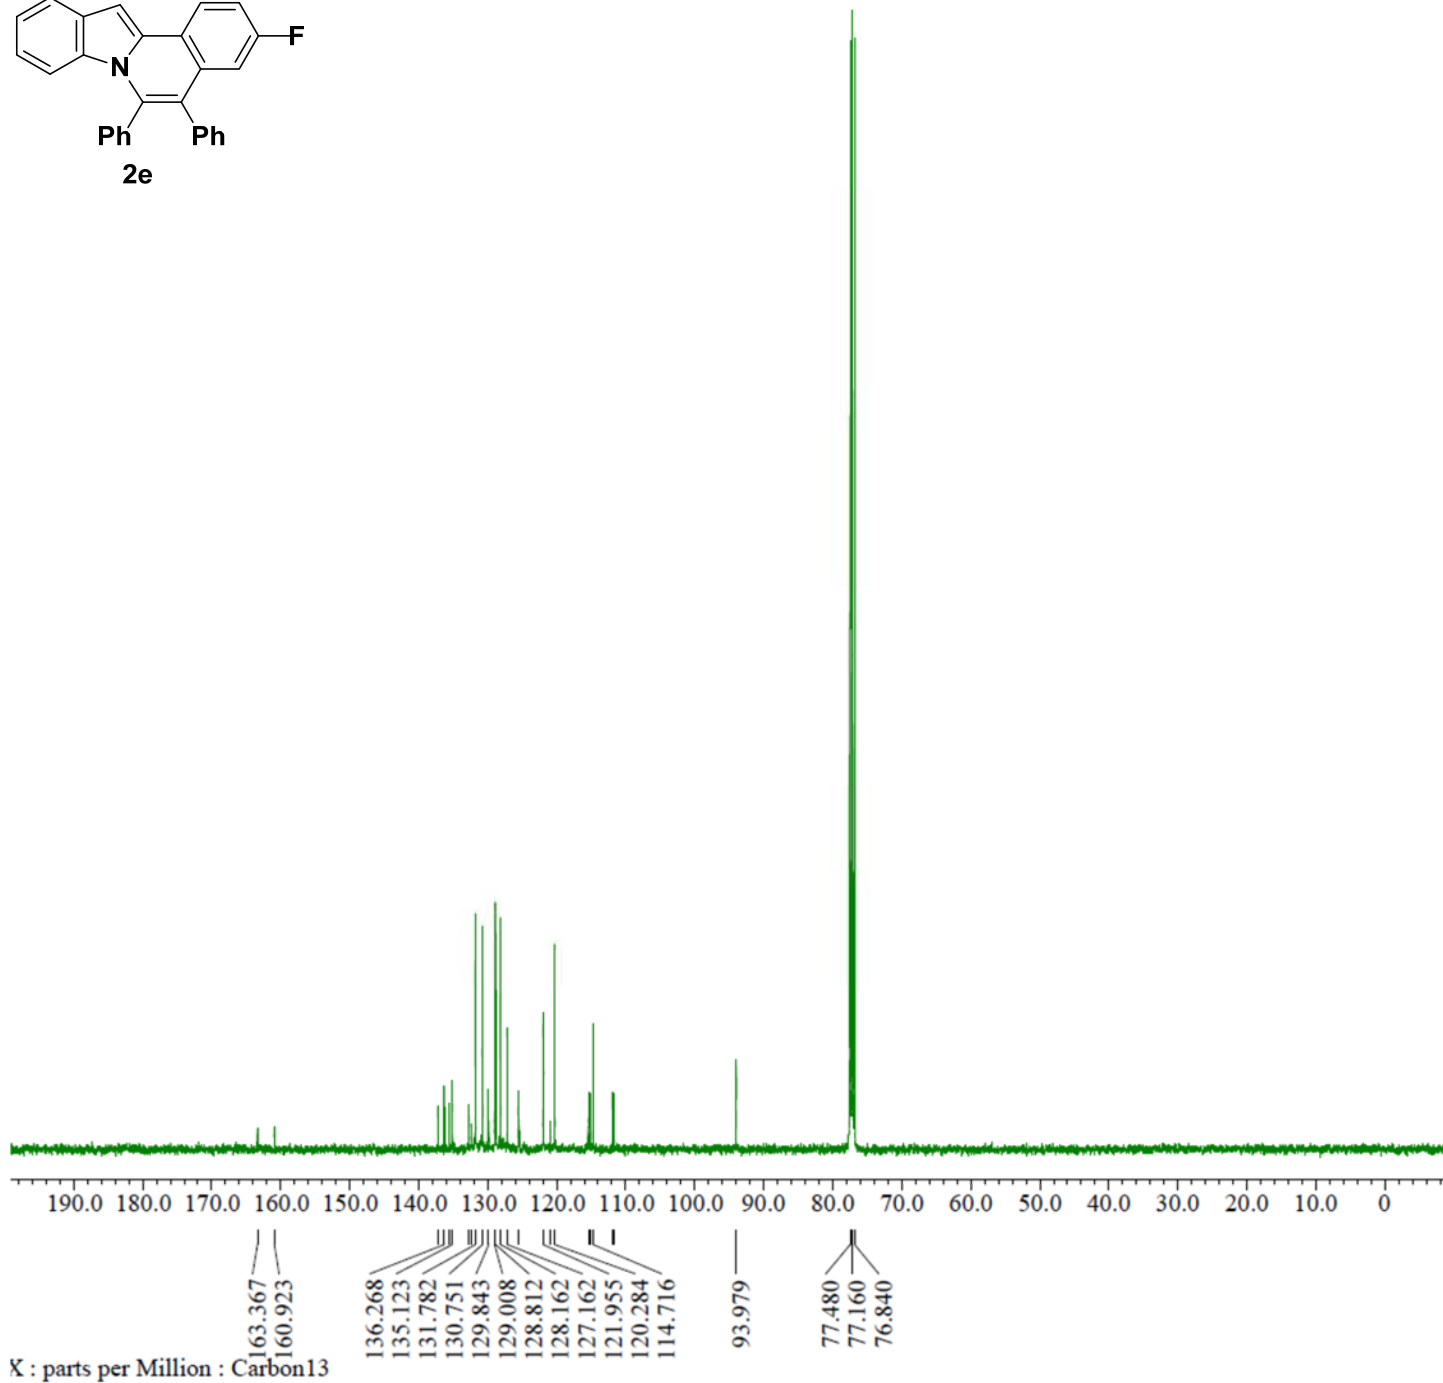

```

Filename      = AO-1134 GPC_Carbon-2-1.jdf
Author       = delta
Experiment   = carbon.jxp
Sample Id    = AO-1134 GPC
Solvent      = CHLOROFORM-D
Creation Time = 23-FEB-2018 02:04:31
Revision Time = 23-FEB-2018 10:03:27
Current Time  = 16-MAR-2018 19:14:07

Comment      = AO-1134 GPC
Data Format   = 1D COMPLEX
Dim Size     = 26214
Dim Title    = Carbon13
Dim Units    = [ppm]
Dimensions   = X
Site         = JNM-ECS400
Spectrometer = DELTA2_NMR

Field Strength = 9.389766[T] (400[MHz])
X Acq Duration = 0.96468992[s]
X Domain      = 13C
X Freq        = 100.52530333[MHz]
X Offset      = 100[ppm]
X Points      = 32768
X Prescans    = 4
X Resolution  = 1.03660252[Hz]
X Sweep      = 33.9673913[kHz]
X Sweep Clipped = 27.17391304[kHz]
Irr Domain    = Proton
Irr Freq      = 399.78219838[MHz]
Irr Offset    = 5[ppm]
Clipped       = FALSE
Scans         = 1024
Total Scans   = 1024

Relaxation_Delay = 2[s]
Recvr Gain       = 60
Temp Get        = 460.0[dC]
X 90 Width     = 12.6[us]
X Acq Time     = 0.96468992[s]
X Angle        = 30[deg]
X Atn          = 6[dB]
X Pulse        = 4.2[us]
Irr Atn Dec    = 20.776[dB]
Irr Atn Noe    = 20.776[dB]
Irr Noise      = WALTZ
Irr Pwidth     = 0.115[ms]
Decoupling     = TRUE
Initial Wait   = 1[s]
Noe            = TRUE
Noe Time       = 2[s]
Repetition Time = 2.96468992[s]

```

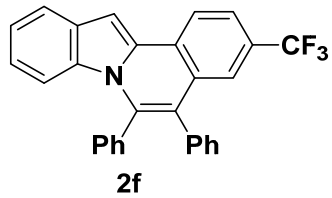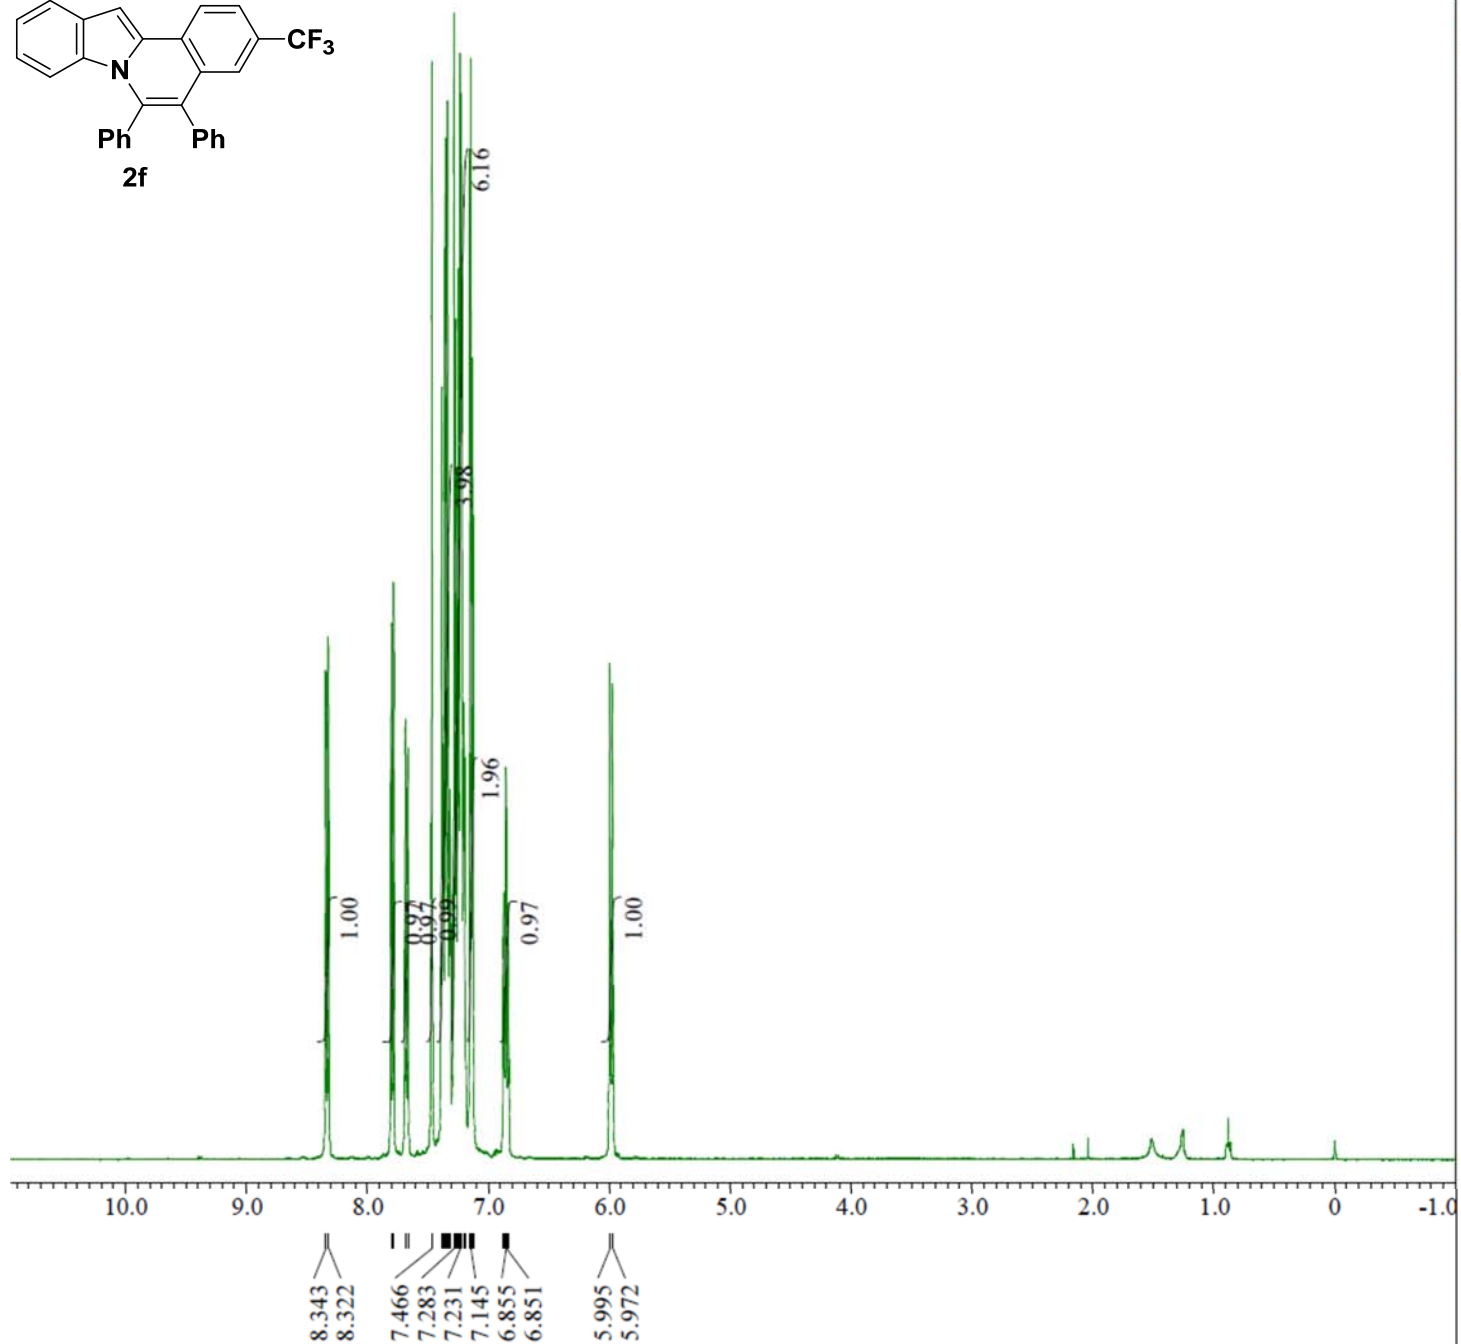

X : parts per Million : Proton

```

Filename      = AO-1189 GPC_Proton-1-1.jdf
Author       = delta
Experiment   = proton.jxp
Sample Id    = AO-1189 GPC
Solvent      = CHLOROFORM-D
Creation Time = 23-FEB-2018 17:39:11
Revision Time = 6-MAR-2018 12:34:54
Current Time  = 16-MAR-2018 19:20:17

Comment      = AO-1189 GPC
Data Format   = 1D COMPLEX
Dim Size     = 13107
Dim Title    = Proton
Dim Units    = [ppm]
Dimensions   = X
Site         = JNM-ECS400
Spectrometer = DELTA2_NMR

Field Strength = 9.389766[T] (400[MHz])
X_Acq_Duration = 2.18103808[s]
X_Domain       = 1H
X_Freq         = 399.78219838[MHz]
X_Offset       = 5[ppm]
X_Points       = 16384
X_Prescans     = 1
X_Resolution   = 0.45849727[Hz]
X_Sweep        = 7.51201923[kHz]
X_Sweep_Clippped = 6.00961538[kHz]
Irr_Domain     = Proton
Irr_Freq       = 399.78219838[MHz]
Irr_Offset     = 5[ppm]
Tri_Domain     = Proton
Tri_Freq       = 399.78219838[MHz]
Tri_Offset     = 5[ppm]
Clipped        = FALSE
Scans          = 8
Total_Scans    = 8

Relaxation_Delay = 5[s]
Recvr Gain       = 30
Temp_Get         = 460.0[dC]
X_90_Width      = 11.1[us]
X_Acq_Time      = 2.18103808[s]
X_Angle         = 45[deg]
X_Atn           = 1[dB]
X_Pulse         = 5.55[us]
Irr_Mode        = Off
Tri_Mode        = Off
Dante_Presat    = FALSE
Initial_Wait    = 1[s]
Repetition_Time = 7.18103808[s]

```



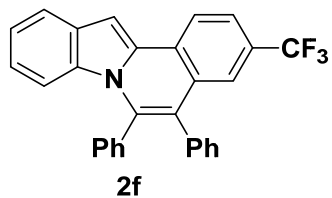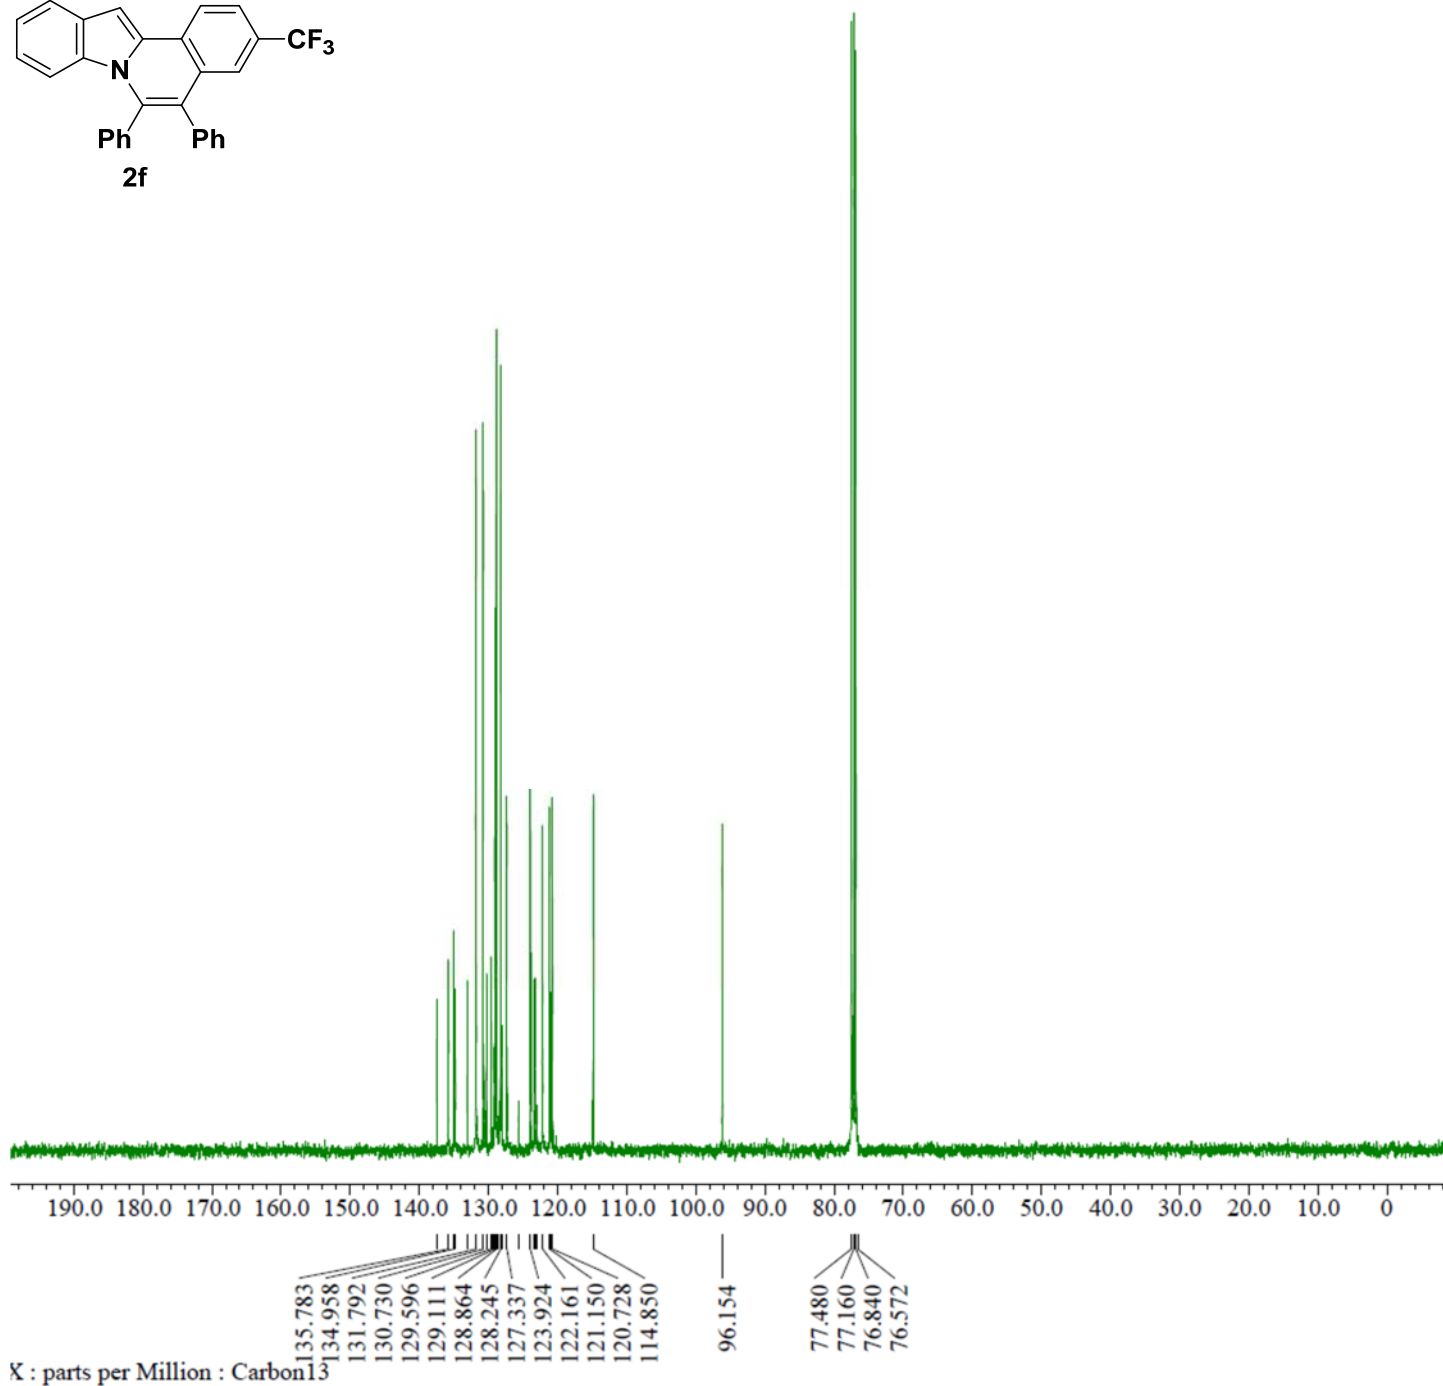

```

Filename      = AO-1189 GPC_Carbon-1-1.jdf
Author       = delta
Experiment   = carbon.jxp
Sample Id    = AO-1189 GPC
Solvent      = CHLOROFORM-D
Creation Time = 24-FEB-2018 03:03:57
Revision Time = 6-MAR-2018 12:36:19
Current Time  = 16-MAR-2018 19:19:57

Comment      = AO-1189 GPC
Data Format   = 1D COMPLEX
Dim Size     = 26214
Dim Title    = Carbon13
Dim Units    = [ppm]
Dimensions   = X
Site         = JNM-ECS400
Spectrometer = DELTA2_NMR

Field Strength = 9.389766[T] (400[MHz])
X Acq Duration = 0.96468992[s]
X Domain      = 13C
X Freq        = 100.52530333[MHz]
X Offset      = 100[ppm]
X Points      = 32768
X Prescans    = 4
X Resolution  = 1.03660252[Hz]
X Sweep       = 33.9673913[kHz]
X Sweep Clipped = 27.17391304[kHz]
Irr Domain    = Proton
Irr Freq      = 399.78219838[MHz]
Irr Offset    = 5[ppm]
Clipped       = FALSE
Scans         = 1024
Total Scans   = 1024

Relaxation Delay = 2[s]
Recvr Gain       = 60
Temp Get        = 460.0[dC]
X 90 Width      = 12.6[us]
X Acq Time      = 0.96468992[s]
X Angle         = 30[deg]
X Atn           = 6[dB]
X Pulse         = 4.2[us]
Irr Atn Dec     = 20.776[dB]
Irr Atn Noe     = 20.776[dB]
Irr Noise       = WALTZ
Irr Pwidth      = 0.115[ms]
Decoupling      = TRUE
Initial Wait    = 1[s]
Noe             = TRUE
Noe Time        = 2[s]
Repetition Time = 2.96468992[s]

```

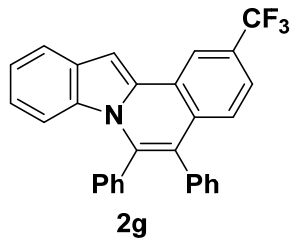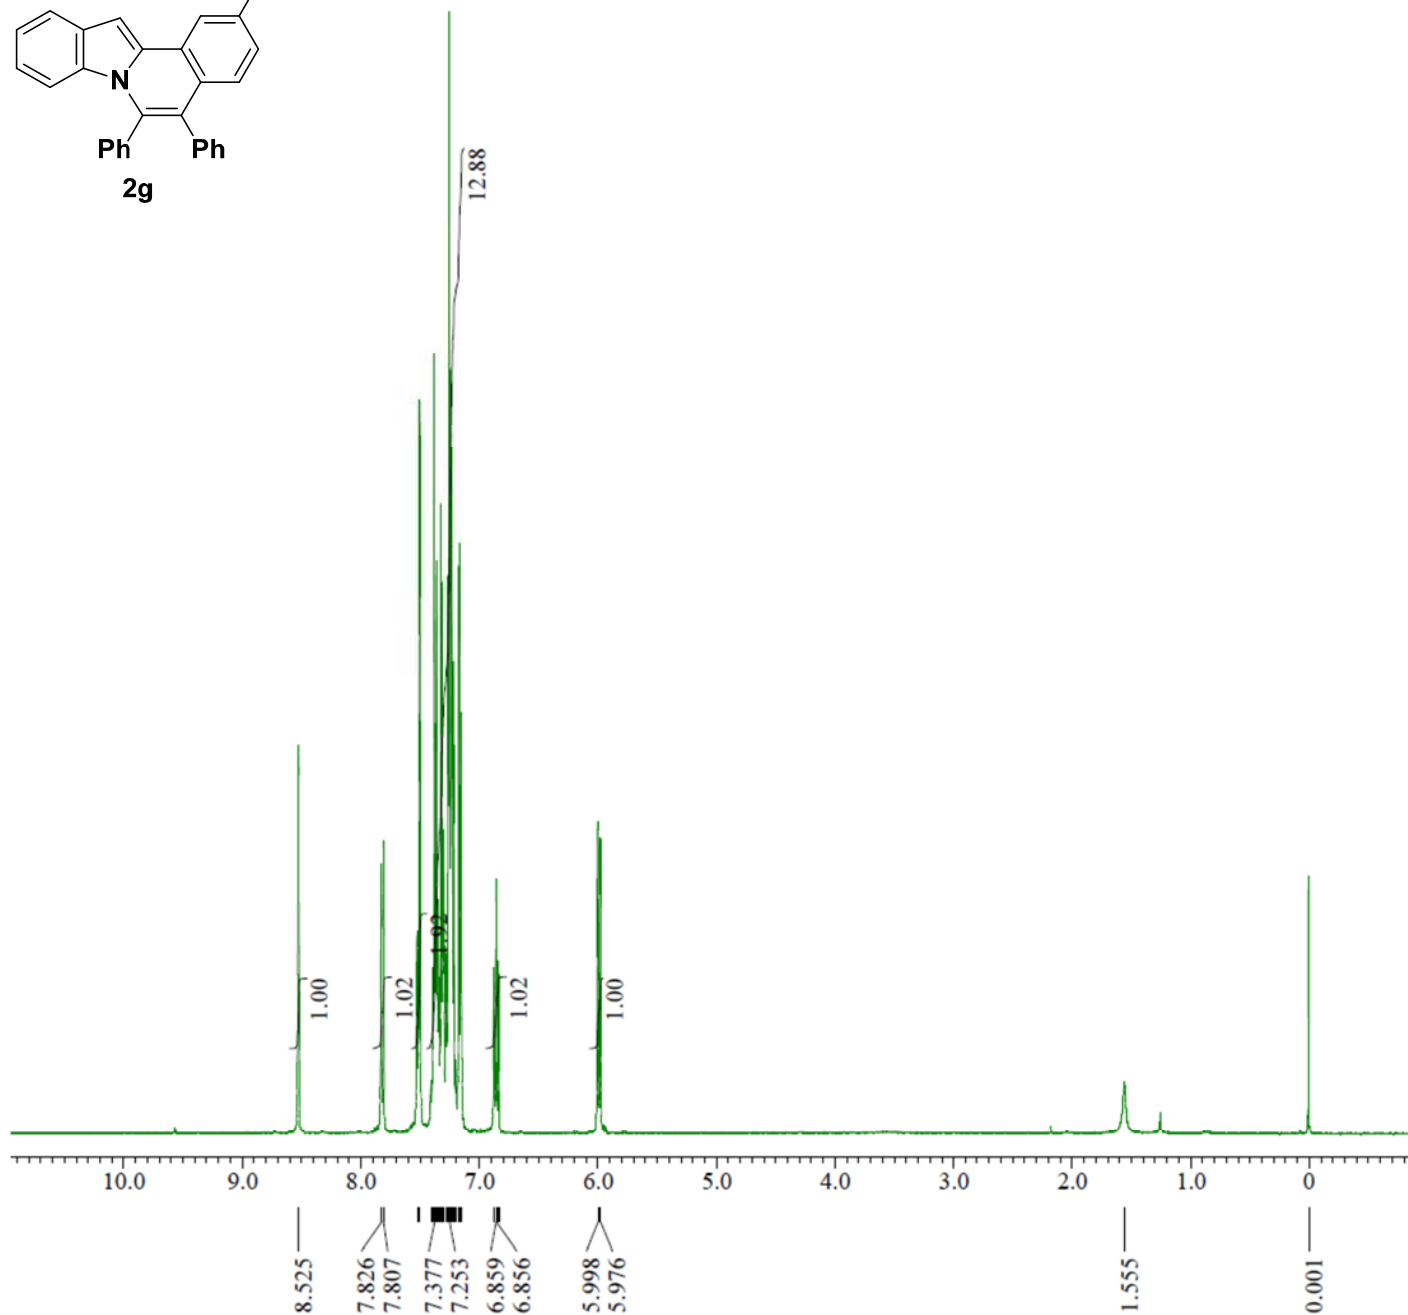

X : parts per Million : Proton

```

Filename      = AO-1174_Proton-1-1.jdf
Author       = delta
Experiment   = proton.jxp
Sample Id    = AO-1174
Solvent      = CHLOROFORM-D
Creation Time = 6-MAR-2018 19:56:07
Revision Time = 7-MAR-2018 10:21:59
Current Time  = 16-MAR-2018 19:18:53

Comment      = AO-1174
Data Format   = 1D_COMPLEX
Dim Size     = 13107
Dim Title    = Proton
Dim Units    = [ppm]
Dimensions   = X
Site         = JNM-ECS400
Spectrometer = DELTA2_NMR

Field Strength = 9.389766[T] (400[MHz])
X_Acq_Duration = 2.18103808[s]
X_Domain       = 1H
X_Freq         = 399.78219838[MHz]
X_Offset       = 5[ppm]
X_Points       = 16384
X_Prescans     = 1
X_Resolution   = 0.45849727[Hz]
X_Sweep        = 7.51201923[kHz]
X_Sweep_Clippped = 6.00961538[kHz]
Irr_Domain     = Proton
Irr_Freq       = 399.78219838[MHz]
Irr_Offset     = 5[ppm]
Tri_Domain     = Proton
Tri_Freq       = 399.78219838[MHz]
Tri_Offset     = 5[ppm]
Clipped        = FALSE
Scans          = 8
Total_Scans    = 8

Relaxation_Delay = 5[s]
Recvr Gain       = 30
Temp_Get         = 460.0[dC]
X_90_Width      = 11.1[us]
X_Acq_Time      = 2.18103808[s]
X_Angle         = 45[deg]
X_Atn           = 1[dB]
X_Pulse         = 5.55[us]
Irr_Mode        = Off
Tri_Mode        = Off
Dante_Presat    = FALSE
Initial_Wait    = 1[s]
Repetition_Time = 7.18103808[s]

```

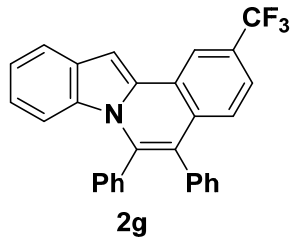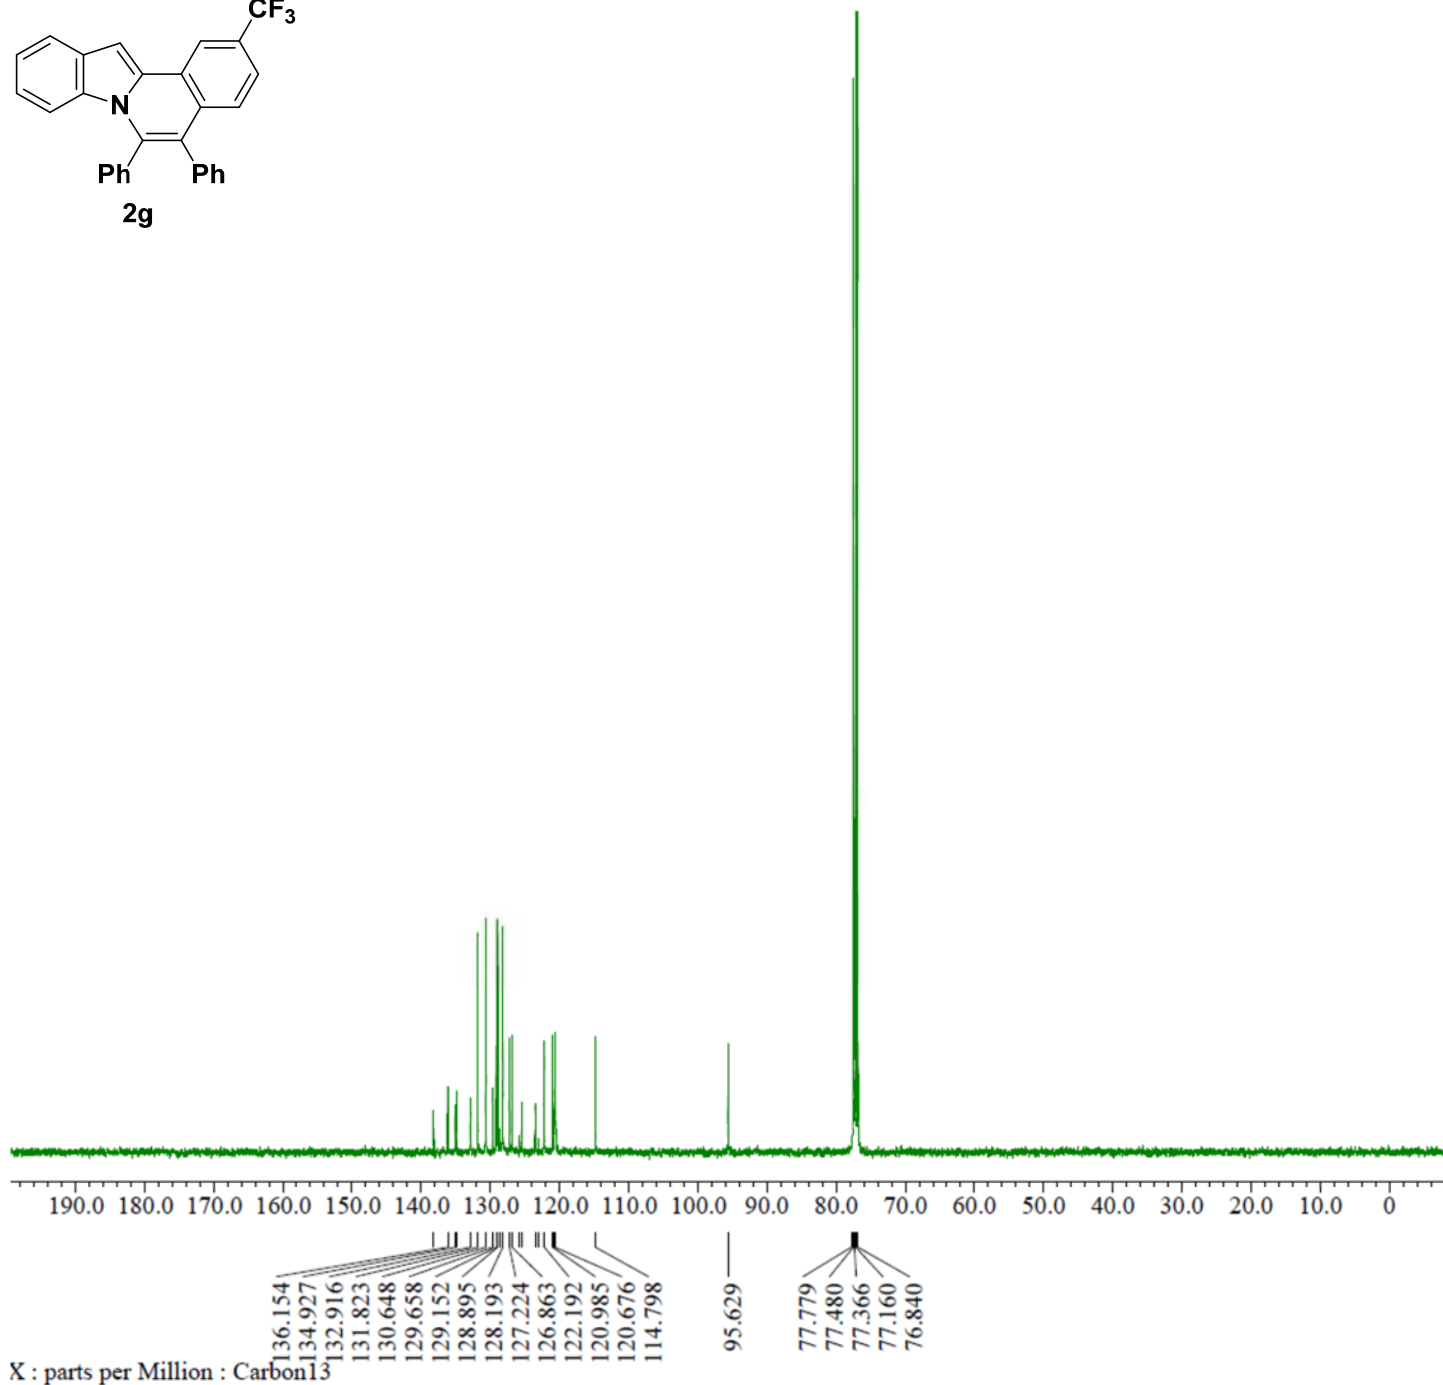

```

Filename      = AO-1174_Carbon-1-1.jdf
Author       = delta
Experiment   = carbon.jxp
Sample Id    = AO-1174
Solvent      = CHLOROFORM-D
Creation Time = 7-MAR-2018 02:05:40
Revision Time = 7-MAR-2018 09:52:14
Current Time  = 16-MAR-2018 19:18:34
  
```

```

Comment      = AO-1174
Data Format   = 1D_COMPLEX
Dim Size     = 26214
Dim Title    = Carbon13
Dim Units    = [ppm]
Dimensions   = X
Site         = JNM-ECS400
Spectrometer = DELTA2_NMR
  
```

```

Field Strength = 9.389766[T] (400[MHz])
X Acq Duration = 0.96468992[s]
X Domain       = 13C
X Freq         = 100.52530333[MHz]
X Offset       = 100[ppm]
X Points       = 32768
X Prescans    = 4
X Resolution   = 1.03660252[Hz]
X Sweep       = 33.9673913[kHz]
X Sweep Clipped = 27.17391304[kHz]
Irr Domain    = Proton
Irr Freq      = 399.78219838[MHz]
Irr Offset    = 5[ppm]
Clipped       = FALSE
Scans         = 2048
Total Scans   = 2048
  
```

```

Relaxation Delay = 2[s]
Recvr Gain       = 60
Temp Get         = 460.0[dC]
X 90 Width      = 12.6[us]
X Acq Time      = 0.96468992[s]
X Angle         = 30[deg]
X Atn           = 6[dB]
X Pulse         = 4.2[us]
Irr Atn Dec     = 20.776[dB]
Irr Atn Noe    = 20.776[dB]
Irr Noise       = WALTZ
Irr Pwidth     = 0.115[ms]
Decoupling      = TRUE
Initial Wait    = 1[s]
Noe             = TRUE
Noe Time        = 2[s]
Repetition Time = 2.96468992[s]
  
```

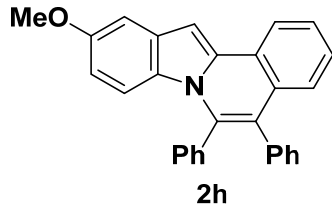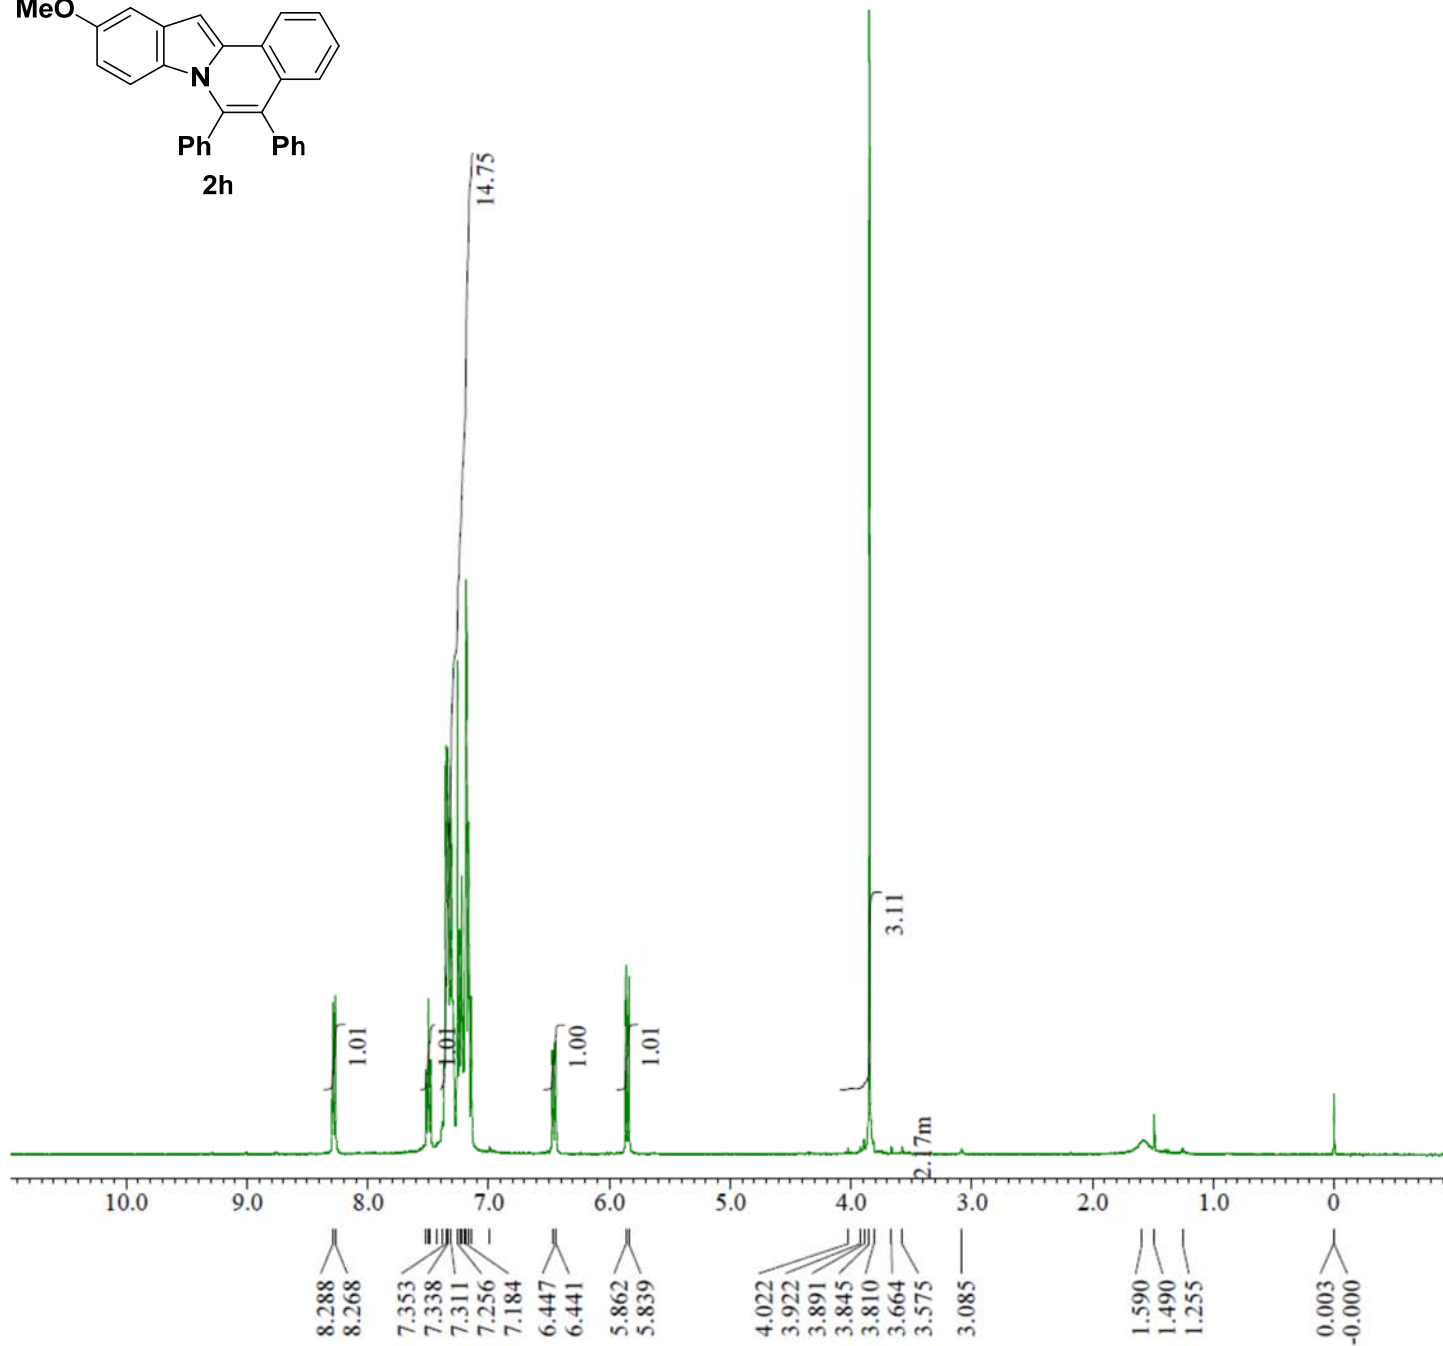

```

Filename      = AO-1156 GPC_Proton-2-3.jdf
Author       = delta
Experiment   = proton.jxp
Sample Id    = AO-1156 GPC
Solvent      = CHLOROFORM-D
Creation Time = 22-FEB-2018 19:22:28
Revision Time = 23-FEB-2018 10:28:52
Current Time  = 16-MAR-2018 19:15:23

Comment      = AO-1156 GPC
Data Format   = 1D COMPLEX
Dim Size     = 13107
Dim Title    = Proton
Dim Units    = [ppm]
Dimensions   = X
Site         = JNM-ECS400
Spectrometer = DELTA2_NMR

Field Strength = 9.389766[T] (400[MHz])
X_Acq_Duration = 2.18103808[s]
X_Domain       = 1H
X_Freq         = 399.78219838[MHz]
X_Offset       = 5[ppm]
X_Points       = 16384
X_Prescans     = 1
X_Resolution   = 0.45849727[Hz]
X_Sweep        = 7.51201923[kHz]
X_Sweep_Clippped = 6.00961538[kHz]
Irr_Domain     = Proton
Irr_Freq       = 399.78219838[MHz]
Irr_Offset     = 5[ppm]
Tri_Domain     = Proton
Tri_Freq       = 399.78219838[MHz]
Tri_Offset     = 5[ppm]
Clipped        = FALSE
Scans          = 8
Total_Scans    = 8

Relaxation_Delay = 5[s]
Recvr Gain       = 30
Temp_Get         = 460.0[dC]
X_90_Width       = 11.1[us]
X_Acq_Time       = 2.18103808[s]
X_Angle          = 45[deg]
X_Atn            = 1[dB]
X_Pulse          = 5.55[us]
Irr_Mode         = Off
Tri_Mode         = Off
DanTe Presat    = FALSE
Initial_Wait     = 1[s]
Repetition_Time  = 7.18103808[s]
  
```

X : parts per Million : Proton

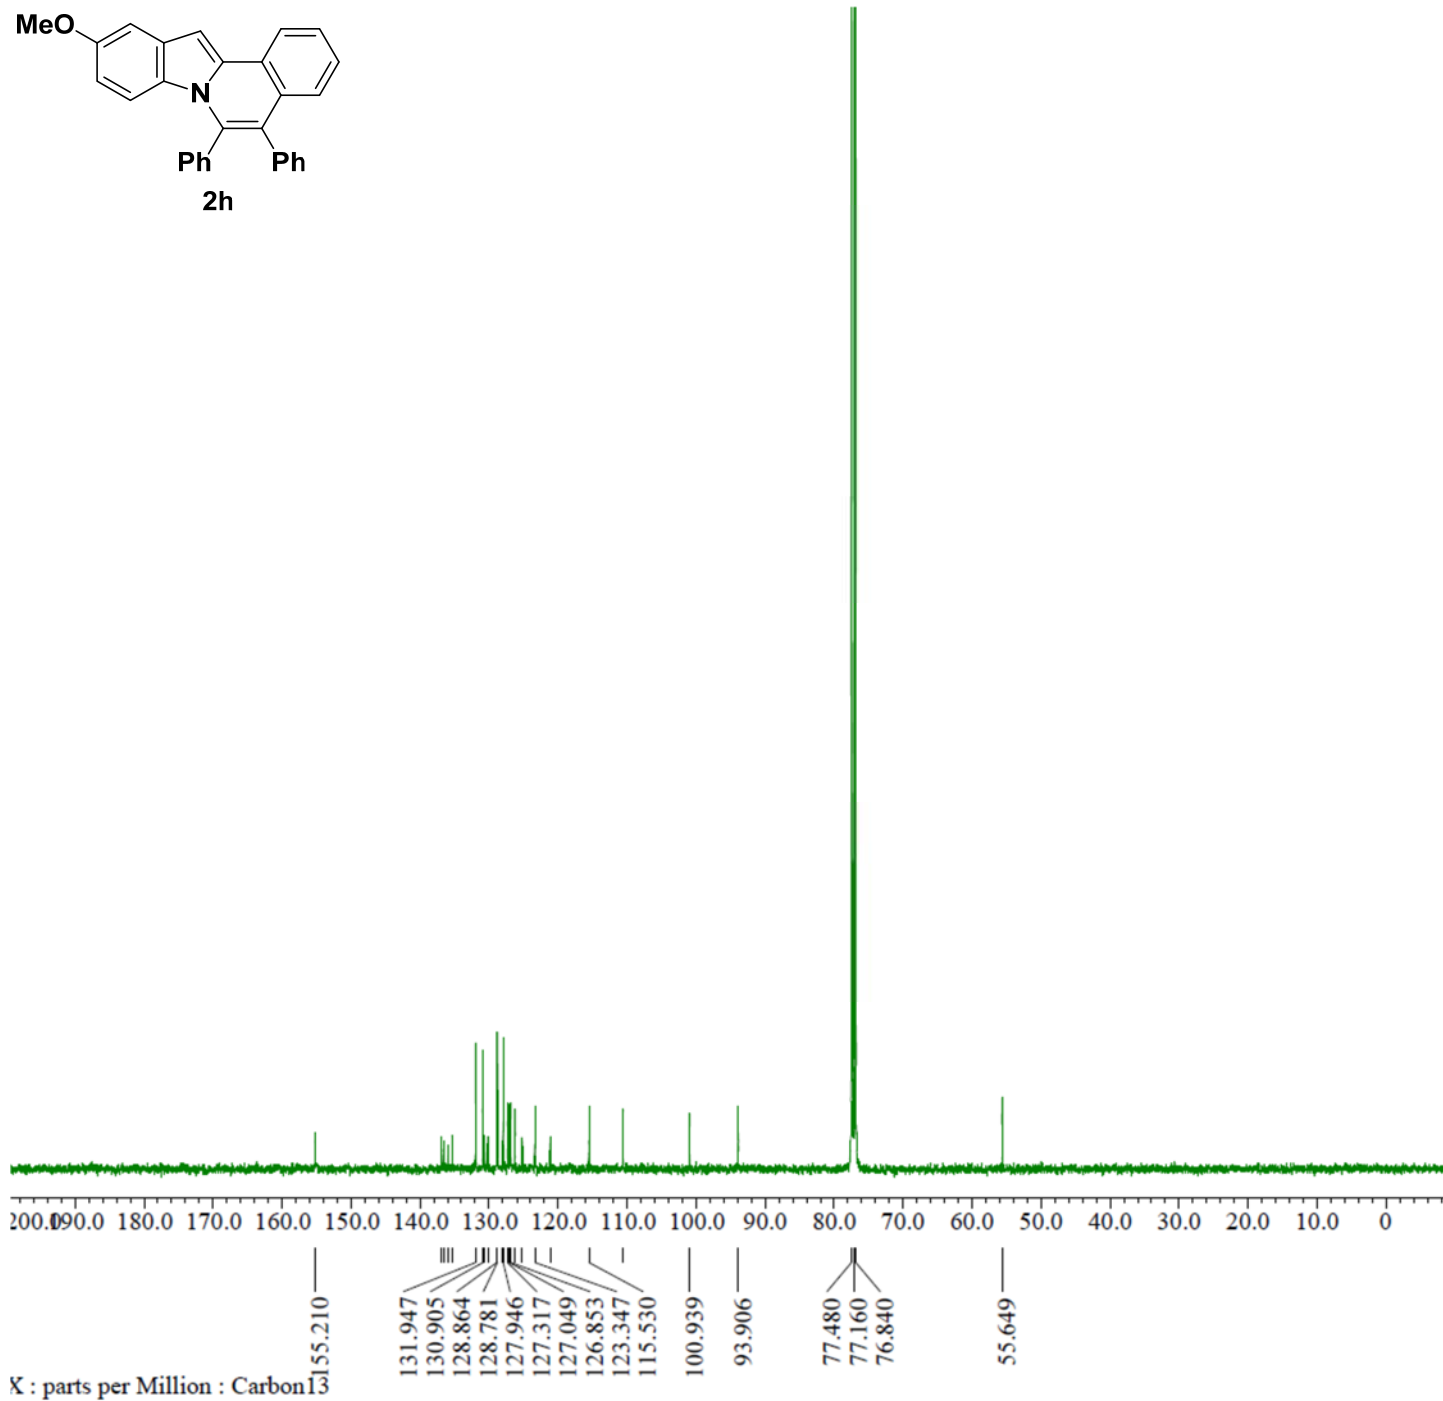

```

Filename      = AO-1156 GPC_Carbon-1-1.jdf
Author       = delta
Experiment   = carbon.jxp
Sample Id    = AO-1156 GPC
Solvent      = CHLOROFORM-D
Creation Time = 23-FEB-2018 05:05:16
Revision Time = 23-FEB-2018 10:02:30
Current Time  = 16-MAR-2018 19:15:51

Comment      = AO-1156 GPC
Data Format   = 1D COMPLEX
Dim Size     = 26214
Dim Title    = Carbon13
Dim Units    = [ppm]
Dimensions   = X
Site         = JNM-ECS400
Spectrometer = DELTA2_NMR

Field Strength = 9.389766[T] (400[MHz])
X Acq Duration = 0.96468992[s]
X Domain      = 13C
X Freq        = 100.52530333[MHz]
X Offset      = 100[ppm]
X Points      = 32768
X Prescans    = 4
X Resolution  = 1.03660252[Hz]
X Sweep       = 33.9673913[kHz]
X Sweep Clipped = 27.17391304[kHz]
Irr Domain    = Proton
Irr Freq      = 399.78219838[MHz]
Irr Offset    = 5[ppm]
Clipped       = FALSE
Scans         = 1024
Total Scans   = 1024

Relaxation_Delay = 2[s]
Recvr Gain       = 60
Temp Get        = 460.0[dC]
X 90 Width      = 12.6[us]
X Acq Time      = 0.96468992[s]
X Angle         = 30[deg]
X Atn           = 6[dB]
X Pulse         = 4.2[us]
Irr Atn Dec     = 20.776[dB]
Irr Atn Noe     = 20.776[dB]
Irr Noise       = WALTZ
Irr Pwidth      = 0.115[ms]
Decoupling      = TRUE
Initial Wait    = 1[s]
Noe             = TRUE
Noe Time        = 2[s]
Repetition Time = 2.96468992[s]
  
```

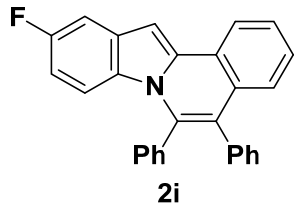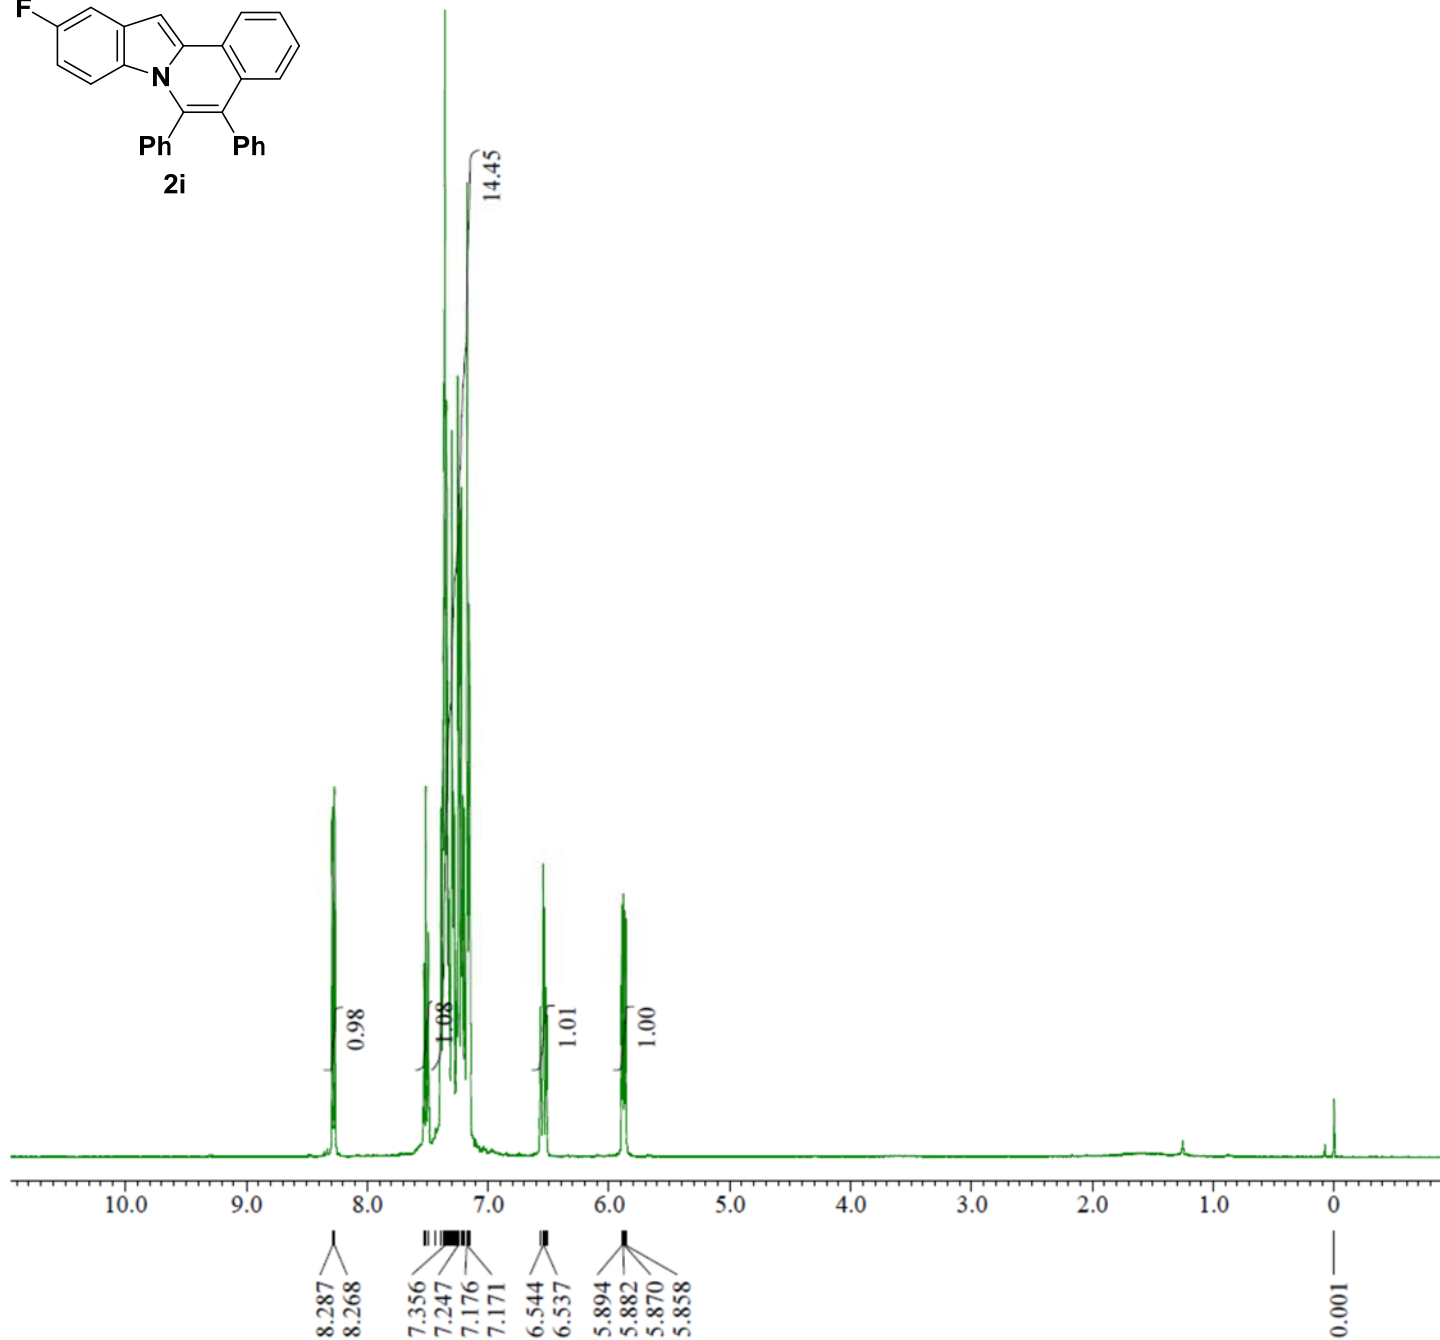

X : parts per Million : Proton

```

Filename      = AO-1151 GPC_Proton-1-1.jdf
Author        = delta
Experiment    = proton.jxp
Sample Id     = AO-1151 GPC
Solvent       = CHLOROFORM-D
Creation Time = 22-FEB-2018 19:16:29
Revision Time = 23-FEB-2018 10:06:05
Current Time  = 16-MAR-2018 19:14:50

Comment       = AO-1151 GPC
Data Format   = 1D COMPLEX
Dim Size      = 13107
Dim Title     = Proton
Dim Units     = [ppm]
Dimensions    = X
Site          = JNM-ECS400
Spectrometer  = DELTA2_NMR

Field Strength = 9.389766[T] (400[MHz])
X_Acq_Duration = 2.18103808[s]
X_Domain       = 1H
X_Freq         = 399.78219838[MHz]
X_Offset       = 5[ppm]
X_Points      = 16384
X_Prescans    = 1
X_Resolution  = 0.45849727[Hz]
X_Sweep       = 7.51201923[kHz]
X_Sweep_Clip  = 6.00961538[kHz]
Irr_Domain     = Proton
Irr_Freq       = 399.78219838[MHz]
Irr_Offset     = 5[ppm]
Tri_Domain     = Proton
Tri_Freq       = 399.78219838[MHz]
Tri_Offset     = 5[ppm]
Clipped       = FALSE
Scans         = 8
Total_Scans   = 8

Relaxation_Delay = 5[s]
Recvr Gain       = 30
Temp_Get         = 460.0[dC]
X_90_Width      = 11.1[us]
X_Acq_Time      = 2.18103808[s]
X_Angle         = 45[deg]
X_Atn           = 1[dB]
X_Pulse         = 5.55[us]
Irr_Mode        = Off
Tri_Mode        = Off
Dante Presat    = FALSE
Initial Wait    = 1[s]
Repetition_Time = 7.18103808[s]
  
```

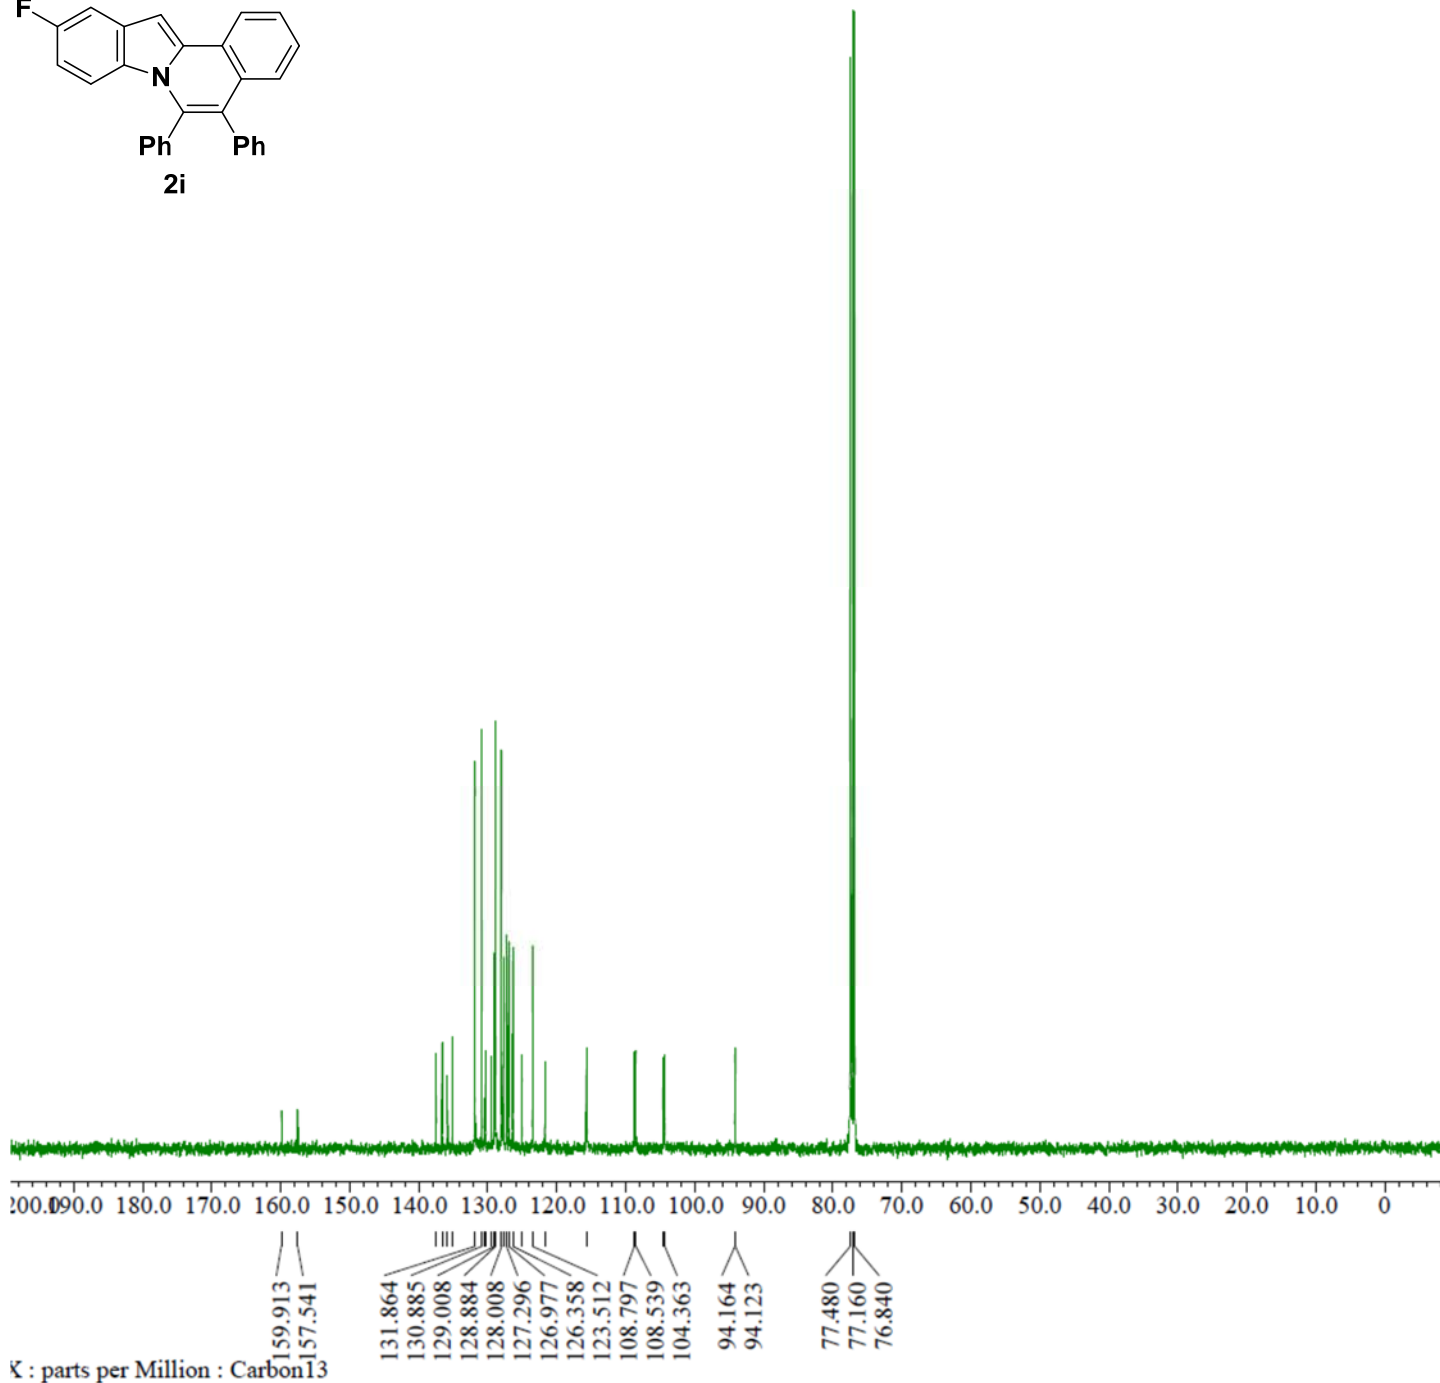

```

Filename      = AO-1151 GPC_Carbon-1-1.jdf
Author       = delta
Experiment   = carbon.jxp
Sample Id    = AO-1151 GPC
Solvent      = CHLOROFORM-D
Creation Time = 23-FEB-2018 04:04:34
Revision Time = 23-FEB-2018 10:00:37
Current Time  = 16-MAR-2018 19:14:29

Comment      = AO-1151 GPC
Data Format   = 1D COMPLEX
Dim Size     = 26214
Dim Title    = Carbon13
Dim Units    = [ppm]
Dimensions   = X
Site         = JNM-ECS400
Spectrometer = DELTA2_NMR

Field Strength = 9.389766[T] (400[MHz])
X_Acq_Duration = 0.96468992[s]
X_Domain      = 13C
X_Freq        = 100.52530333[MHz]
X_Offset      = 100[ppm]
X_Points     = 32768
X_Prescans   = 4
X_Resolution = 1.03660252[Hz]
X_Sweep       = 33.9673913[kHz]
X_Sweep_Clip = 27.17391304[kHz]
Irr_Domain    = Proton
Irr_Freq     = 399.78219838[MHz]
Irr_Offset    = 5[ppm]
Clipped      = FALSE
Scans        = 1024
Total_Scans  = 1024

Relaxation_Delay = 2[s]
Recvr Gain       = 60
Temp_Get        = 460.0[dC]
X_90_Width     = 12.6[us]
X_Acq_Time     = 0.96468992[s]
X_Angle        = 30[deg]
X_Atn          = 6[dB]
X_Pulse        = 4.2[us]
Irr_Atn_Dec    = 20.776[dB]
Irr_Atn_Noise  = 20.776[dB]
Irr_Noise      = WALTZ
Irr_Pwidth     = 0.115[ms]
Decoupling     = TRUE
Initial_Wait   = 1[s]
Noe            = TRUE
Noe Time       = 2[s]
Repetition_Time = 2.96468992[s]

```

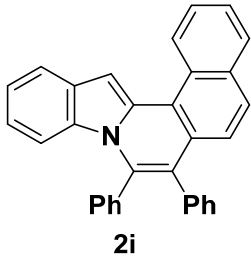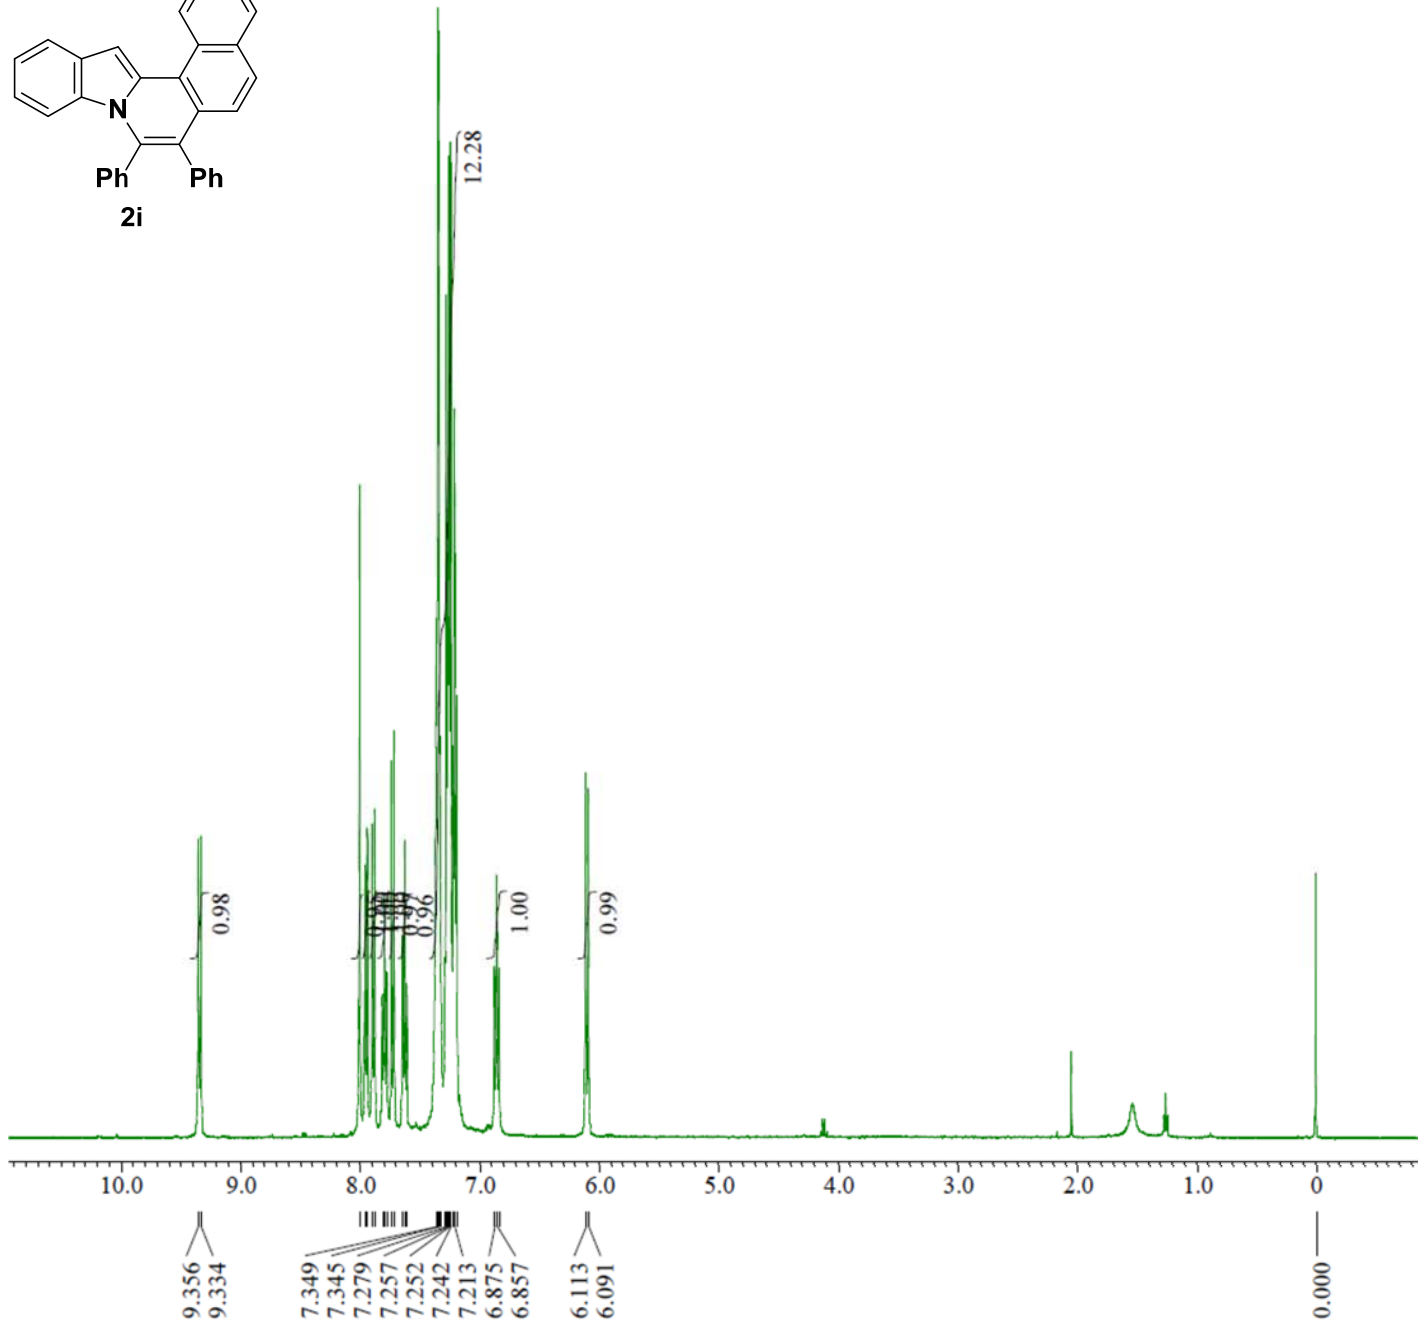

X : parts per Million : Proton

```

Filename      = AO-1160 GPC_Proton-2-3.jdf
Author       = delta
Experiment   = proton.jxp
Sample Id    = AO-1160 GPC
Solvent      = CHLOROFORM-D
Creation Time = 26-FEB-2018 21:19:05
Revision Time = 9-MAR-2018 16:02:55
Current Time  = 16-MAR-2018 19:17:19

Comment      = AO-1160 GPC
Data Format   = 1D COMPLEX
Dim Size     = 13107
Dim Title    = Proton
Dim Units    = [ppm]
Dimensions   = X
Site         = JNM-ECS400
Spectrometer = DELTA2_NMR

Field Strength = 9.389766[T] (400[MHz])
X Acq_Duration = 2.18103808[s]
X_Domain      = 1H
X_Freq        = 399.78219838[MHz]
X_Offset      = 5[ppm]
X_Points      = 16384
X_Prescans    = 1
X_Resolution  = 0.45849727[Hz]
X_Sweep       = 7.51201923[kHz]
X_Sweep_Clip  = 6.00961538[kHz]
Irr_Domain    = Proton
Irr_Freq      = 399.78219838[MHz]
Irr_Offset    = 5[ppm]
Tri_Domain    = Proton
Tri_Freq      = 399.78219838[MHz]
Tri_Offset    = 5[ppm]
Clipped       = FALSE
Scans         = 8
Total_Scans   = 8

Relaxation_Delay = 5[s]
Recvr Gain       = 30
Temp_Get         = 460.0[dC]
X_90_Width      = 11.1[us]
X_Acq_Time      = 2.18103808[s]
X_Angle         = 45[deg]
X_Atn           = 1[dB]
X_Pulse         = 5.55[us]
Irr_Mode        = Off
Tri_Mode        = Off
Dante Presat    = FALSE
Initial Wait    = 1[s]
Repetition_Time = 7.18103808[s]
  
```



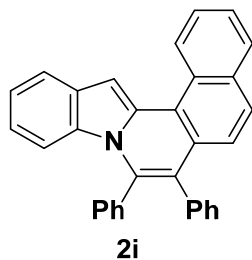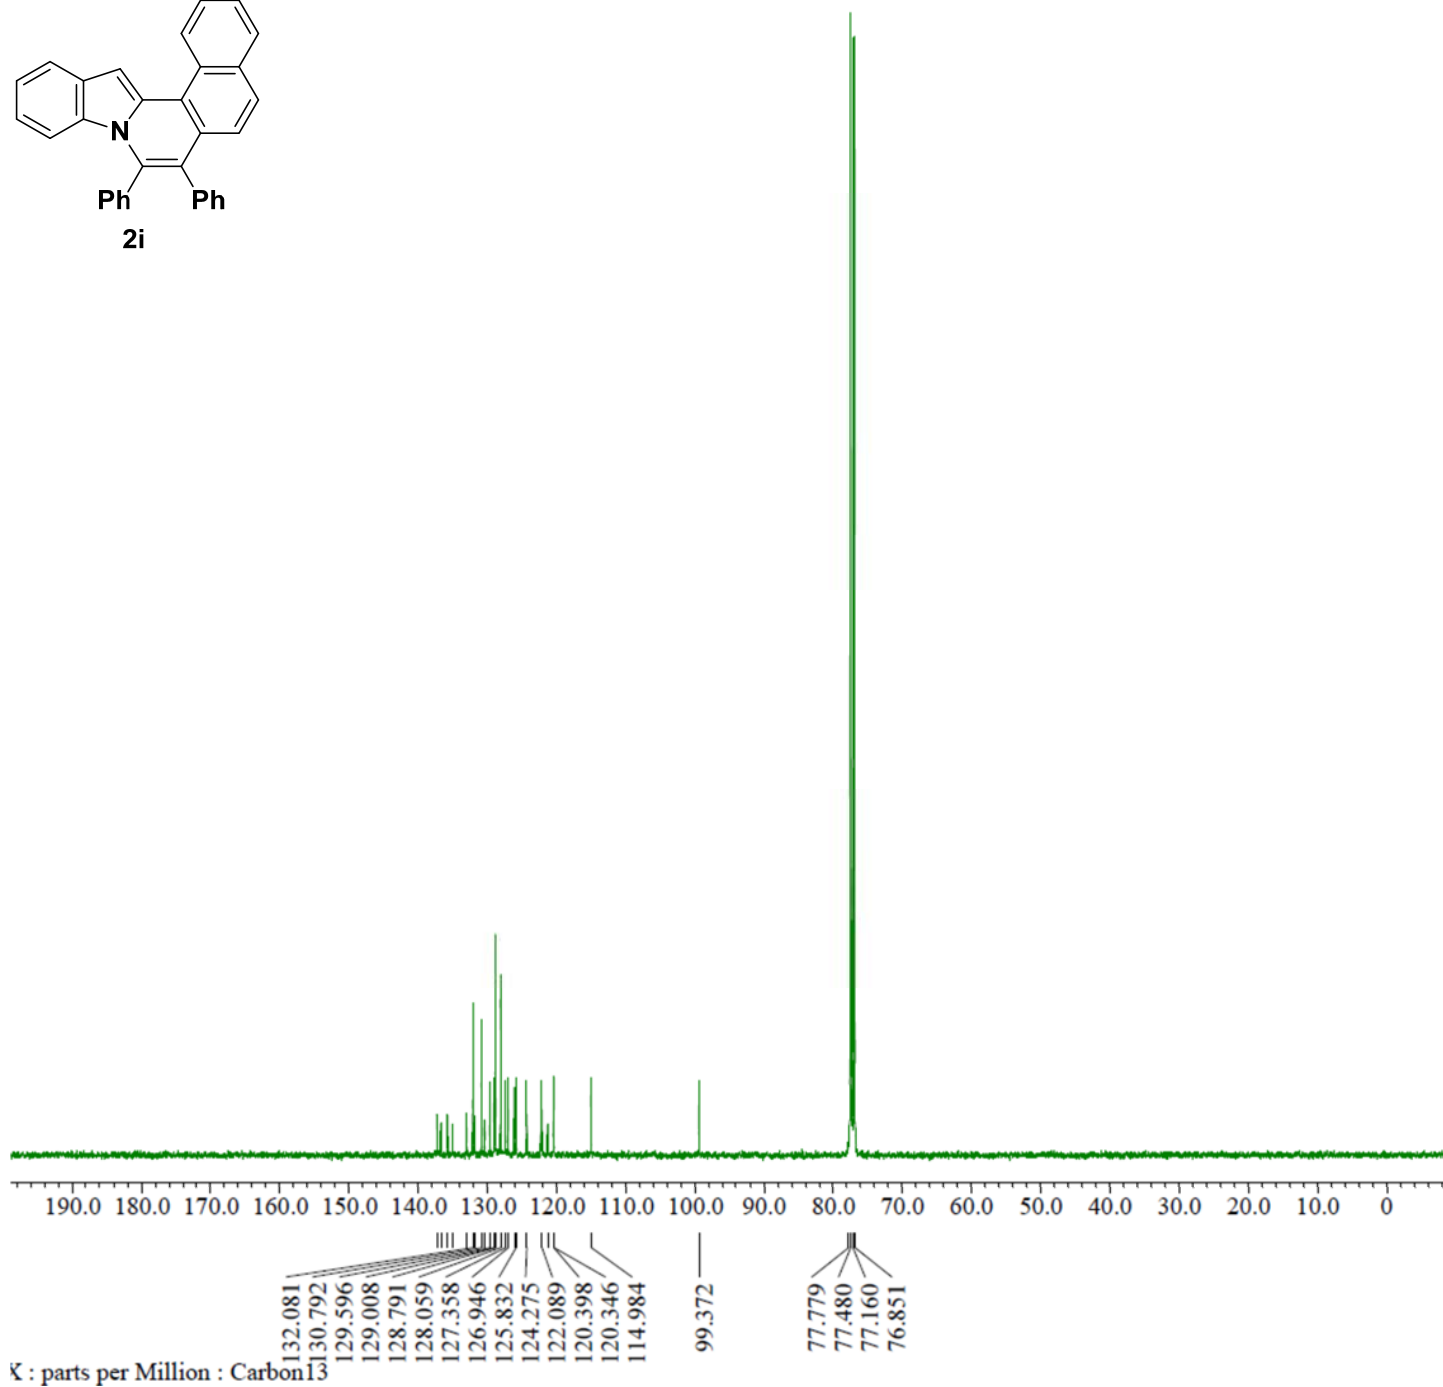

```

Filename      = AO-1160 GPC_Carbon-1-1.jdf
Author       = delta
Experiment   = carbon.jxp
Sample Id    = AO-1160 GPC
Solvent      = CHLOROFORM-D
Creation Time = 27-FEB-2018 08:05:35
Revision Time = 27-FEB-2018 13:03:51
Current Time  = 16-MAR-2018 19:17:05

Comment      = AO-1160 GPC
Data Format   = 1D COMPLEX
Dim Size     = 26214
Dim Title    = Carbon13
Dim Units    = [ppm]
Dimensions   = X
Site         = JNM-ECS400
Spectrometer = DELTA2_NMR

Field Strength = 9.389766[T] (400[MHz])
X_Acq_Duration = 0.96468992[s]
X_Domain      = 13C
X_Freq        = 100.52530333[MHz]
X_Offset      = 100[ppm]
X_Points      = 32768
X_Prescans    = 4
X_Resolution  = 1.03660252[Hz]
X_Sweep       = 33.9673913[kHz]
X_Sweep_Clip  = 27.17391304[kHz]
Irr_Domain    = Proton
Irr_Freq      = 399.78219838[MHz]
Irr_Offset    = 5[ppm]
Clipped       = FALSE
Scans         = 1024
Total_Scans   = 1024

Relaxation_Delay = 2[s]
Recvr Gain       = 60
Temp_Get         = 460.0[dC]
X_90_Width      = 12.6[us]
X_Acq_Time      = 0.96468992[s]
X_Angle         = 30[deg]
X_Atn           = 6[dB]
X_Pulse         = 4.2[us]
Irr_Atn_Dec     = 20.776[dB]
Irr_Atn_No     = 20.776[dB]
Irr_Noise       = WALTZ
Irr_Pwidth      = 0.115[ms]
Decoupling      = TRUE
Initial_Wait    = 1[s]
Noe              = TRUE
Noe Time        = 2[s]
Repetition_Time = 2.96468992[s]

```

X : parts per Million : Carbon13

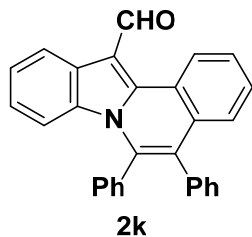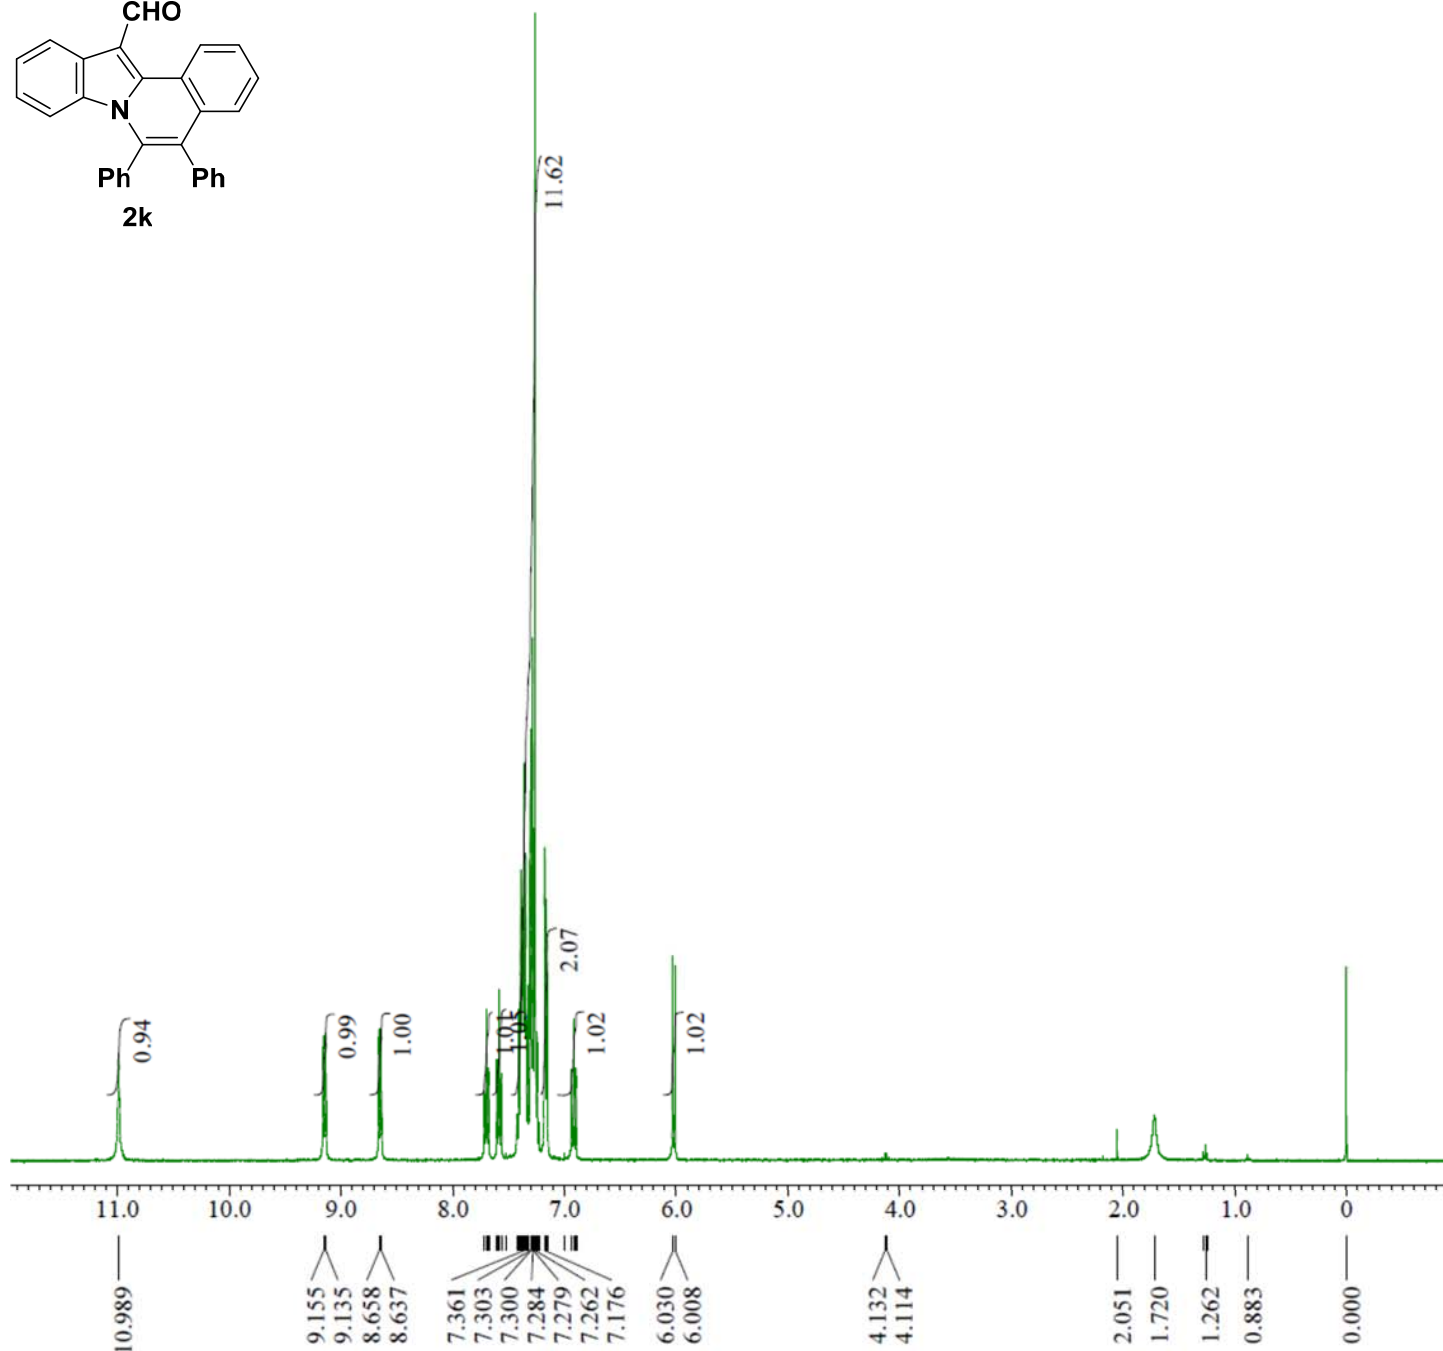

X : parts per Million : Proton

```

Filename      = AO-1158 GPC_Proton-1-1.jdf
Author       = delta
Experiment    = proton.jxp
Sample Id    = AO-1158 GPC
Solvent      = CHLOROFORM-D
Creation Time = 22-FEB-2018 18:29:36
Revision Time = 23-FEB-2018 10:04:50
Current Time  = 16-MAR-2018 19:16:41

Comment      = AO-1158 GPC
Data Format   = 1D COMPLEX
Dim Size     = 13107
Dim Title    = Proton
Dim Units    = [ppm]
Dimensions   = X
Site         = JNM-ECS400
Spectrometer = DELTA2_NMR

Field Strength = 9.389766[T] (400[MHz])
X Acq Duration = 2.18103808[s]
X Domain      = 1H
X Freq        = 399.78219838[MHz]
X Offset      = 5[ppm]
X Points      = 16384
X Prescans    = 1
X Resolution  = 0.45849727[Hz]
X Sweep       = 7.51201923[kHz]
X Sweep Clipped = 6.00961538[kHz]
Irr Domain    = Proton
Irr Freq      = 399.78219838[MHz]
Irr Offset    = 5[ppm]
Tri Domain    = Proton
Tri Freq      = 399.78219838[MHz]
Tri Offset    = 5[ppm]
Clipped       = FALSE
Scans         = 8
Total Scans   = 8

Relaxation Delay = 5[s]
Recvr Gain       = 30
Temp Get         = 460.0[dC]
X 90 Width      = 11.1[us]
X Acq Time      = 2.18103808[s]
X Angle          = 45[deg]
X Atn           = 1[dB]
X Pulse         = 5.55[us]
Irr Mode        = Off
Tri Mode        = Off
Dante Presat    = FALSE
Initial Wait    = 1[s]
Repetition Time = 7.18103808[s]
  
```

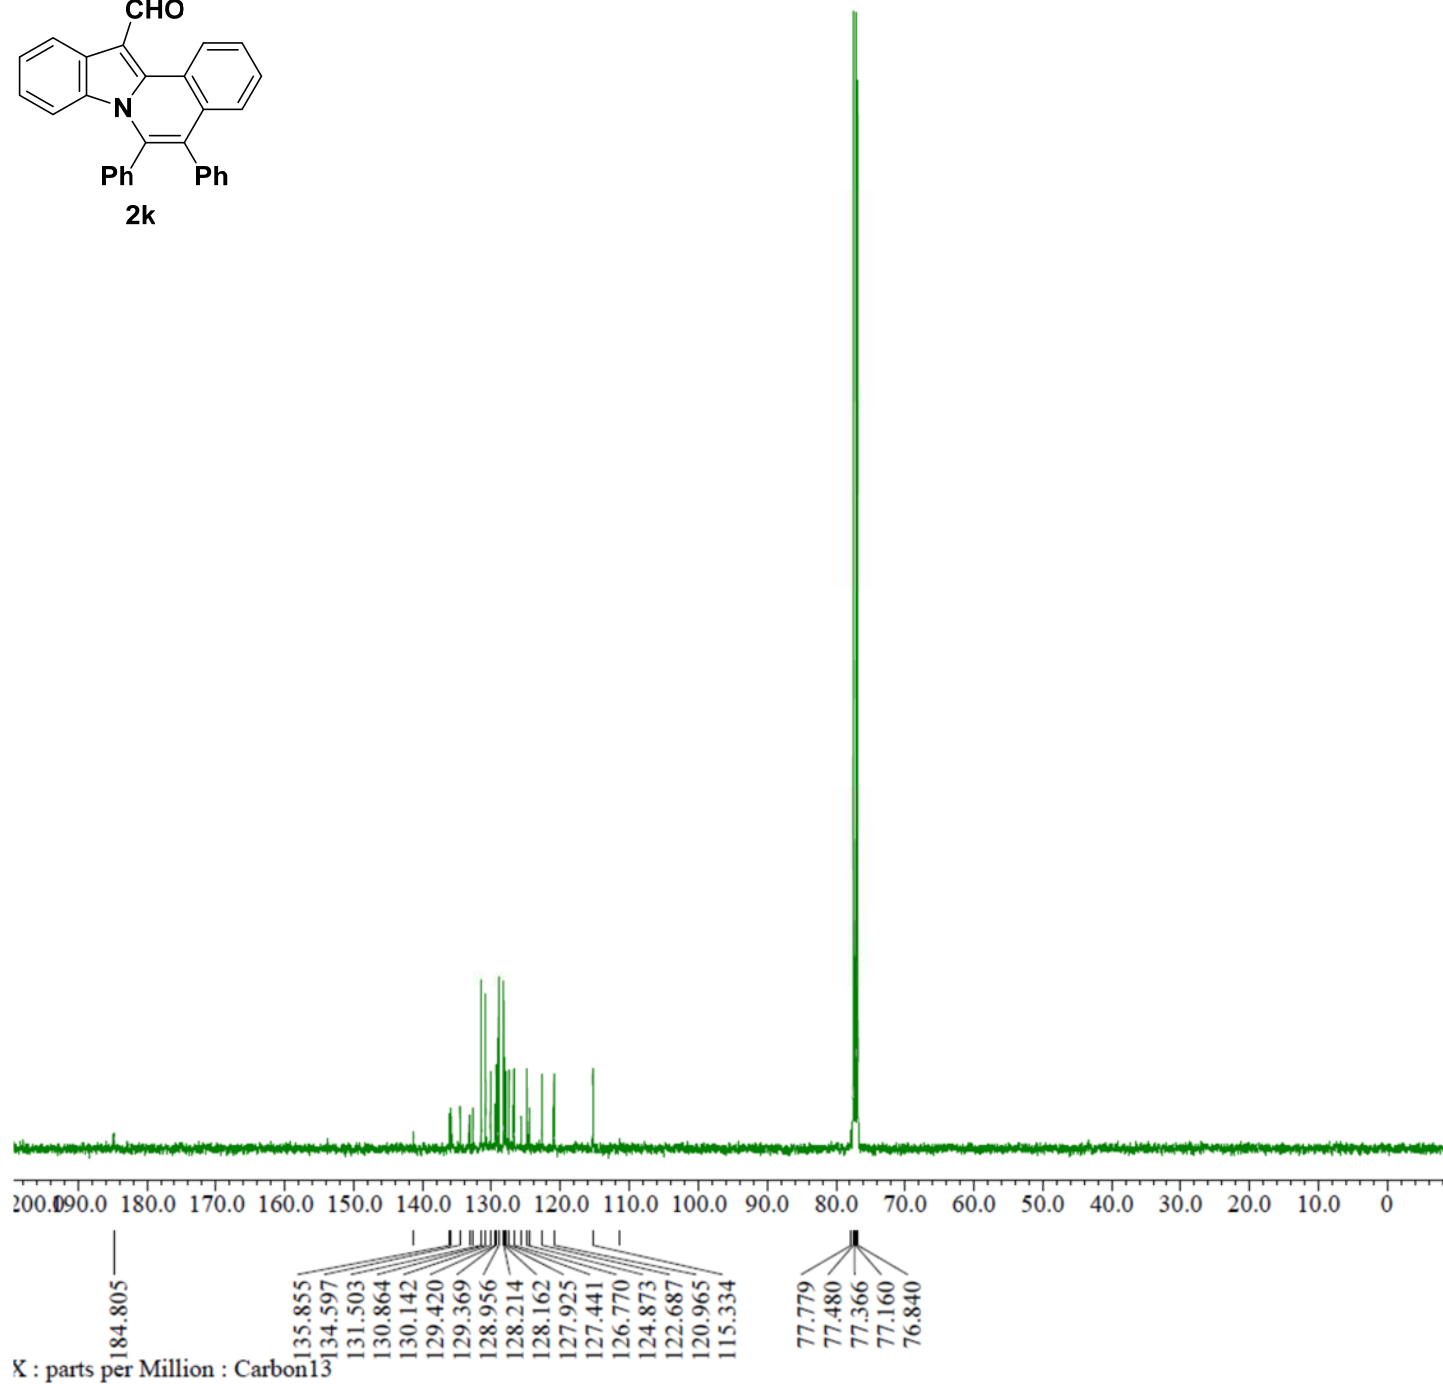

```

Filename      = AO-1158 GPC_Carbon-2-3.jdf
Author       = delta
Experiment    = carbon.jxp
Sample Id    = AO-1158 GPC
Solvent      = CHLOROFORM-D
Creation Time = 24-FEB-2018 02:05:27
Revision Time = 12-MAR-2018 14:19:57
Current Time  = 16-MAR-2018 19:16:22

Comment      = AO-1158 GPC
Data Format   = 1D COMPLEX
Dim Size     = 26214
Dim Title    = Carbon13
Dim Units    = [ppm]
Dimensions   = X
Site         = JNM-ECS400
Spectrometer = DELTA2_NMR

Field Strength = 9.389766[T] (400[MHz])
X Acq Duration = 0.96468992[s]
X Domain      = 13C
X Freq        = 100.52530333[MHz]
X Offset      = 100[ppm]
X Points      = 32768
X Prescans    = 4
X Resolution  = 1.03660252[Hz]
X Sweep      = 33.9673913[kHz]
X Sweep Clipped = 27.17391304[kHz]
Irr Domain    = Proton
Irr Freq      = 399.78219838[MHz]
Irr Offset    = 5[ppm]
Clipped       = TRUE
Scans         = 1024
Total Scans   = 1024

Relaxation_Delay = 2[s]
Recvr Gain       = 60
Temp Get        = 460.0[dC]
X 90 Width     = 12.6[us]
X Acq Time     = 0.96468992[s]
X Angle        = 30[deg]
X Atn          = 6[dB]
X Pulse       = 4.2[us]
Irr Atn Dec    = 20.776[dB]
Irr Atn Noe    = 20.776[dB]
Irr Noise      = WALTZ
Irr Pwidth     = 0.115[ms]
Decoupling     = TRUE
Initial Wait   = 1[s]
Noe            = TRUE
Noe Time       = 2[s]
Repetition Time = 2.96468992[s]

```

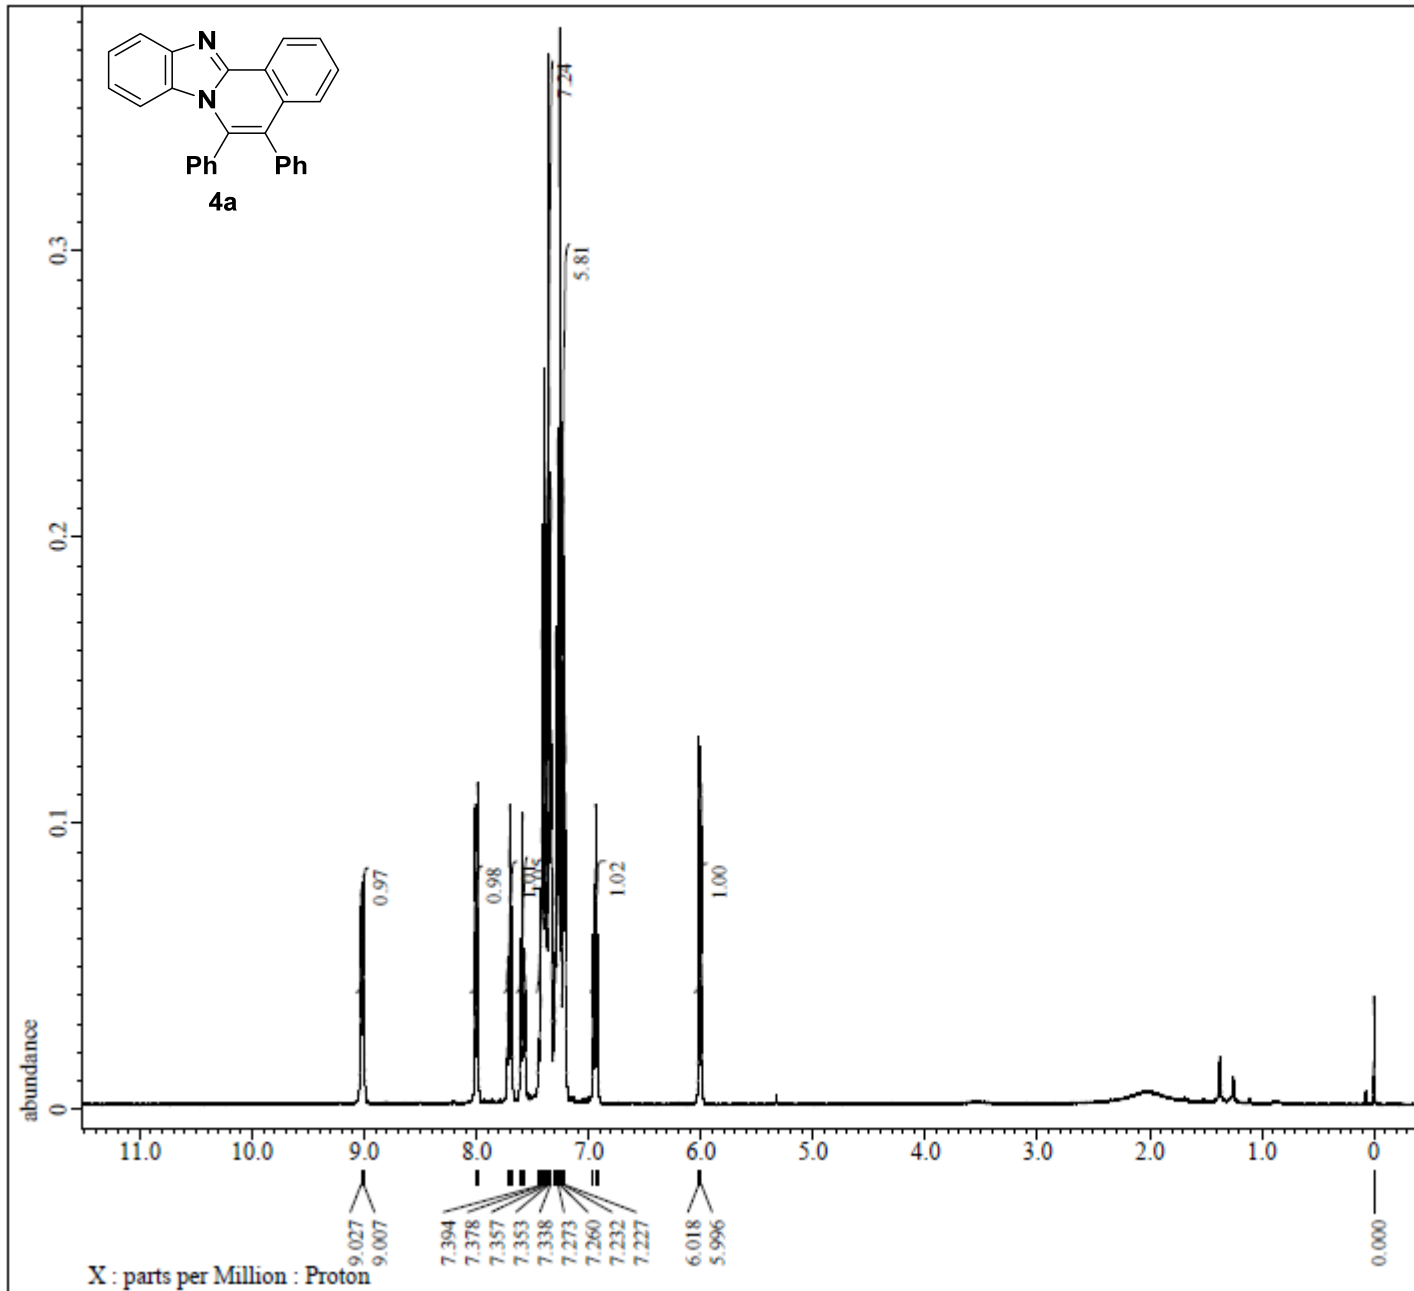

```

---- PROCESSING PARAMETERS ----
dc_balance( 0, FALSE )
sexp( 0.2[Hz], 0.0[s] )
trapezoid( 0[%], 0[%], 80[%], 100[%] )
zerofill( 1 )
fft( 1, TRUE, TRUE )
machinephase
ppm

```

```

Filename      = AS_283_column_b_Proton-1-2
Author        = delta
Experiment     = proton.jxp
Sample Id     = AS_283_column_b
Solvent       = CHLOROFORM-D
Creation Time  = 5-JUN-2018 21:56:06
Revision Time = 6-JUN-2018 14:58:11
Current Time  = 25-OCT-2018 08:54:44

```

```

Comment       = AS_283_column_b
Data Format    = 1D_COMPLEX
Dim Size      = 26214
Dim Title     = Proton
Dim Units     = [ppm]
Dimensions    = X
Site          = JNM-EC8400
Spectrometer  = DELTA2_NMR

```

```

Field Strength = 9.389766[T] (400[MHz])
X_Acq_Duration = 4.36207616[s]
X_Domain       = 1H
X_Freq         = 399.78219838[MHz]
X_Offset       = 5[ppm]
X_Points       = 32768
X_Prescans     = 1
X_Resolution   = 0.22924863[Hz]
X_Sweep        = 7.51201923[kHz]
X_Sweep_Clippped = 6.00961538[kHz]
Irr_Domain     = Proton
Irr_Freq       = 399.78219838[MHz]
Irr_Offset     = 5[ppm]
Tri_Domain     = Proton
Tri_Freq       = 399.78219838[MHz]
Tri_Offset     = 5[ppm]
Clipped        = FALSE
Scans          = 8
Total_Scans    = 8

```

```

Relaxation_Delay = 5[s]
Recvr_Gain       = 34
Temp_Get         = 19.7[dc]
X_90_Width       = 11.5[us]
X_Acq_Time       = 4.36207616[s]
X_Angle          = 45[deg]
X_Atn            = 1.5[dB]
X_Pulse          = 5.75[us]
Irr_Mode         = Off
Tri_Mode         = Off

```

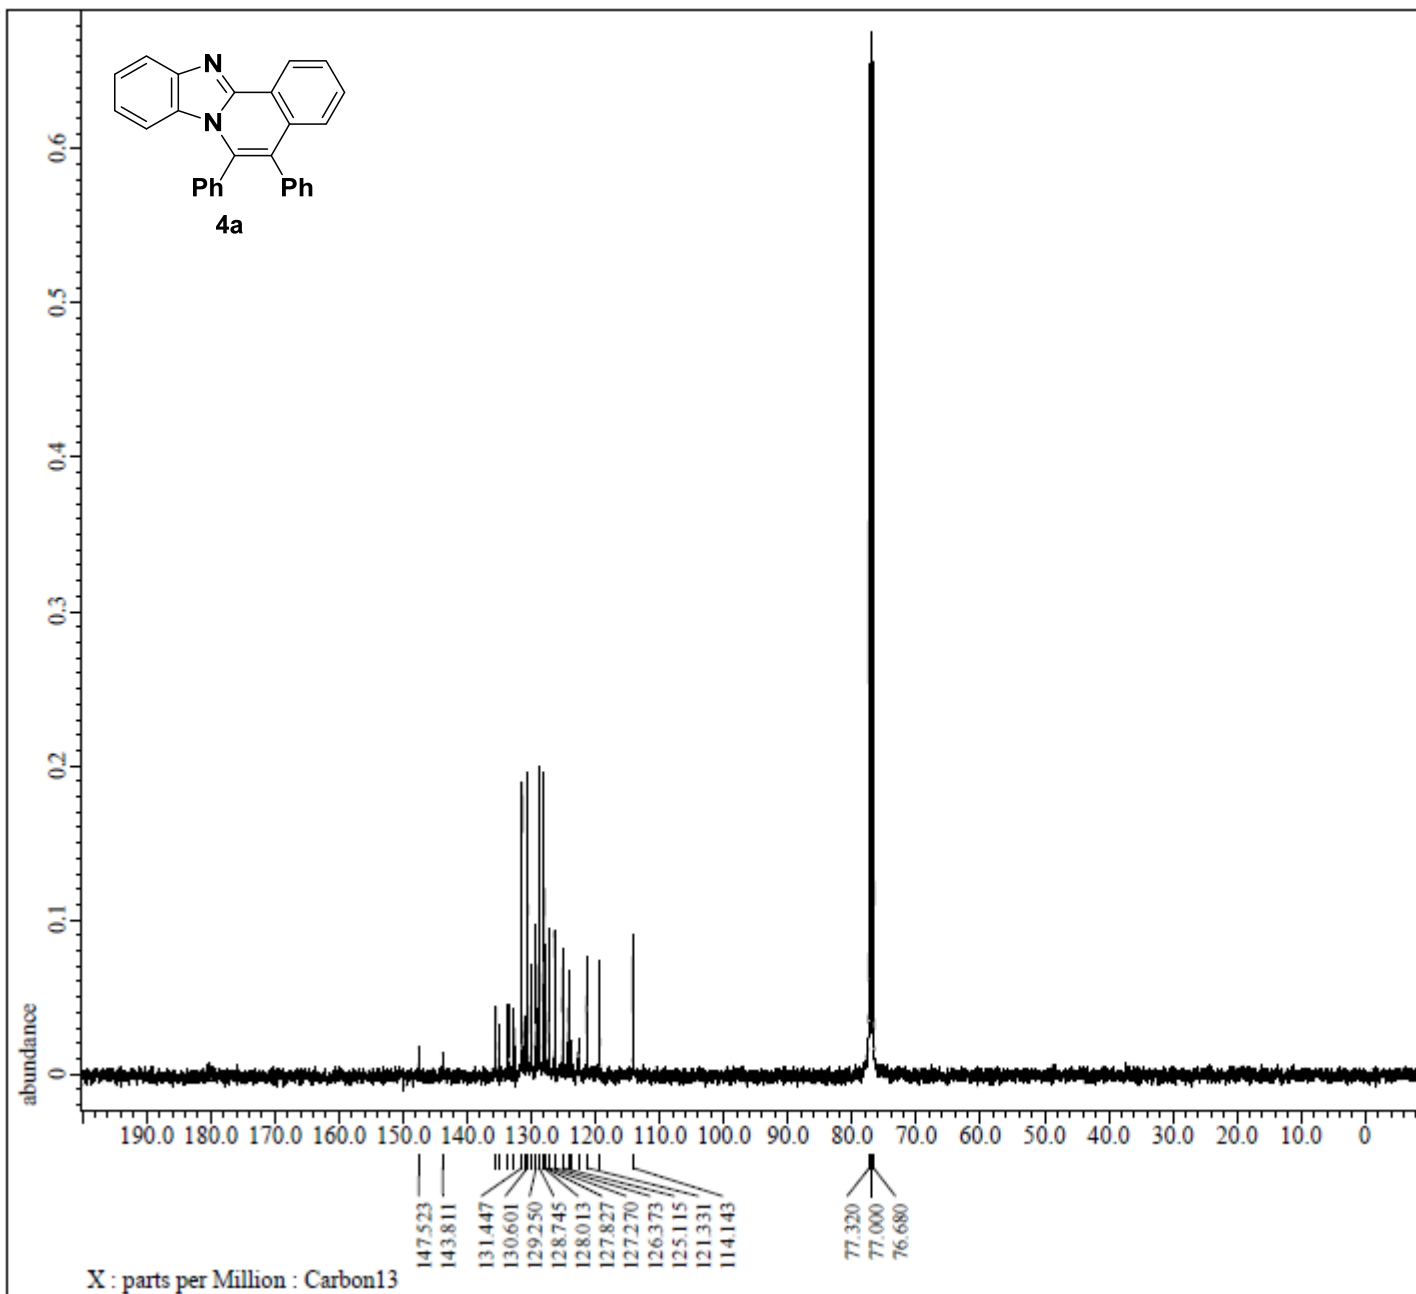

---- PROCESSING PARAMETERS ----  
do\_balance( 0, FALSE )  
sexp( 2.0[Hz], 0.0[s] )  
trapezoid( 0[%], 0[%], 80[%], 100[%] )  
zerofill( 1 )  
fft( 1, TRUE, TRUE )  
machinephase  
ppm

Filename = AS 283 column b\_Carbon-2-3  
Author = delta  
Experiment = carbon.jxp  
Sample Id = AS 283 column b  
Solvent = CHLOROFORM-D  
Creation\_Time = 8-JUN-2018 02:08:40  
Revision\_Time = 25-OCT-2018 09:01:50  
Current\_Time = 25-OCT-2018 09:02:11

Comment = AS 283 column b  
Data Format = 1D COMPLEX  
Dim\_Size = 26214  
Dim\_Title = Carbon13  
Dim\_Units = [ppm]  
Dimensions = X  
Site = JNM-ECS400  
Spectrometer = DELTA2\_NMR  
Field Strength = 9.389766[T] (400[MHz])  
X\_Acq\_Duration = 0.96468992[s]  
X\_Domain = 13C  
X\_Freq = 100.52530333[MHz]  
X\_Offset = 100[ppm]  
X\_Points = 32768  
X\_Prescans = 4  
X\_Resolution = 1.03660252[Hz]  
X\_Sweep = 33.9673913[kHz]  
X\_Sweep\_Clipped = 27.17391304[kHz]  
Irr\_Domain = Proton  
Irr\_Freq = 399.78219838[MHz]  
Irr\_Offset = 5[ppm]  
Clipped = FALSE  
Scans = 1024  
Total\_Scans = 1024

Relaxation\_Delay = 2[s]  
Recvr Gain = 60  
Temp\_Get = 20[dc]  
X\_90\_Width = 14.5[us]  
X\_Acq\_Time = 0.96468992[s]  
X\_Angle = 30[deg]  
X\_Atn = 7[dB]  
X\_Pulse = 4.83333333[us]  
Irr\_Atn\_Dec = 21.5[dB]  
Irr\_Atn\_No = 21.5[dB]  
Irr\_Noise = WALTZ  
Irr\_Pwidth = 0.115[ms]  
Decoupling = TRUE

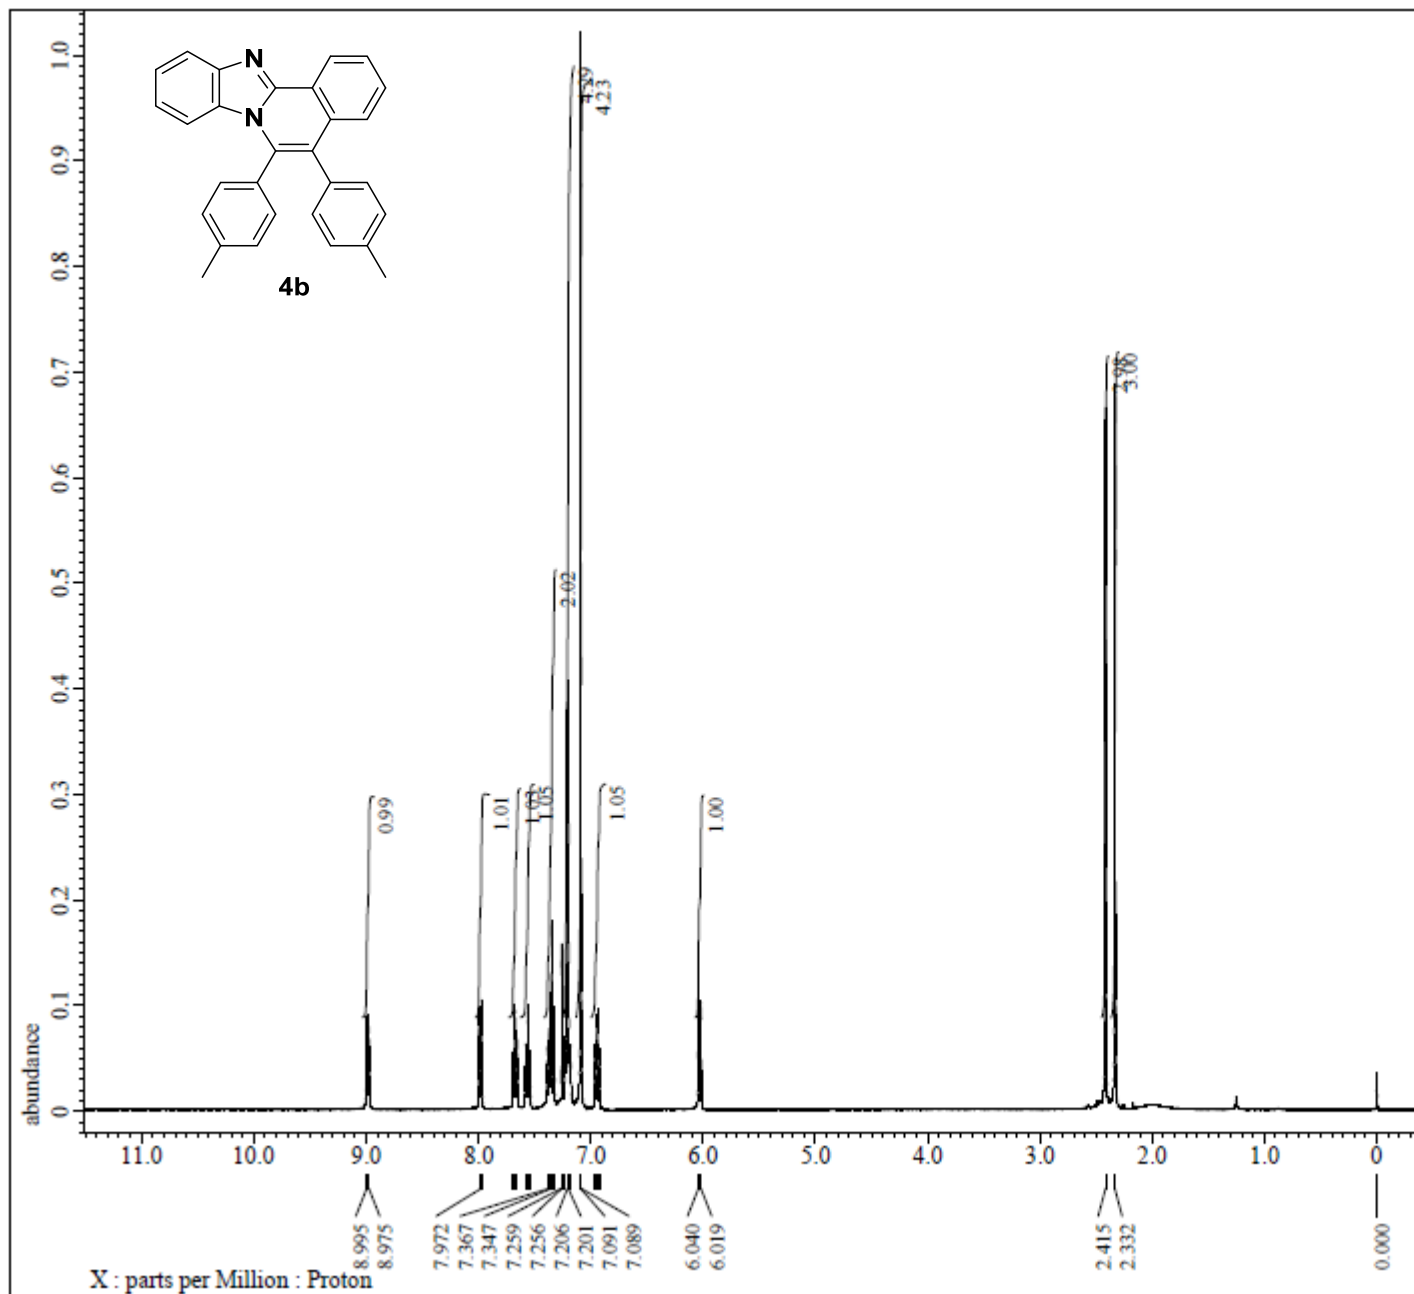

----- PROCESSING PARAMETERS -----  
 dc\_balance( 0, FALSE )  
 sexp( 0.2[Hz], 0.0[s] )  
 trapezoid( 0[%], 0[%], 80[%], 100[%] )  
 zerofill( 1 )  
 fft( 1, TRUE, TRUE )  
 machinephase  
 ppm

Filename = AS\_329\_column\_f15-18\_rc\_Pr  
 Author = delta  
 Experiment = proton.jxp  
 Sample\_Id = AS\_329\_column\_f15-18\_rc  
 Solvent = CHLOROFORM-D  
 Creation\_Time = 17-MAY-2018 10:04:02  
 Revision\_Time = 17-MAY-2018 10:31:26  
 Current\_Time = 25-OCT-2018 09:12:20

Comment = AS\_329\_column\_f15-18\_rc  
 Data\_Format = 1D\_COMPLEX  
 Dim\_Size = 26214  
 Dim\_Title = Proton  
 Dim\_Units = [ppm]  
 Dimensions = X  
 Site = JNM-ECS400  
 Spectrometer = DELTA2\_NMR

Field\_Strength = 9.389766[T] (400[MHz])  
 X\_Acq\_Duration = 4.36207616[s]  
 X\_Domain = 1H  
 X\_Freq = 399.78219838[MHz]  
 X\_Offset = 5[ppm]  
 X\_Points = 32768  
 X\_Prescans = 1  
 X\_Resolution = 0.22924863[Hz]  
 X\_Sweep = 7.51201923[kHz]  
 X\_Sweep\_Clippped = 6.00961538[kHz]  
 Irr\_Domain = Proton  
 Irr\_Freq = 399.78219838[MHz]  
 Irr\_Offset = 5[ppm]  
 Tri\_Domain = Proton  
 Tri\_Freq = 399.78219838[MHz]  
 Tri\_Offset = 5[ppm]  
 Clipped = FALSE  
 Scans = 8  
 Total\_Scans = 8

Relaxation\_Delay = 5[s]  
 Recvr\_Gain = 32  
 Temp\_Get = 19.6[dc]  
 X\_90\_Width = 11.5[us]  
 X\_Acq\_Time = 4.36207616[s]  
 X\_Angle = 45[deg]  
 X\_Atn = 1.5[db]  
 X\_Pulse = 5.75[us]  
 IIR\_Mode = Off  
 Tri\_Mode = Off

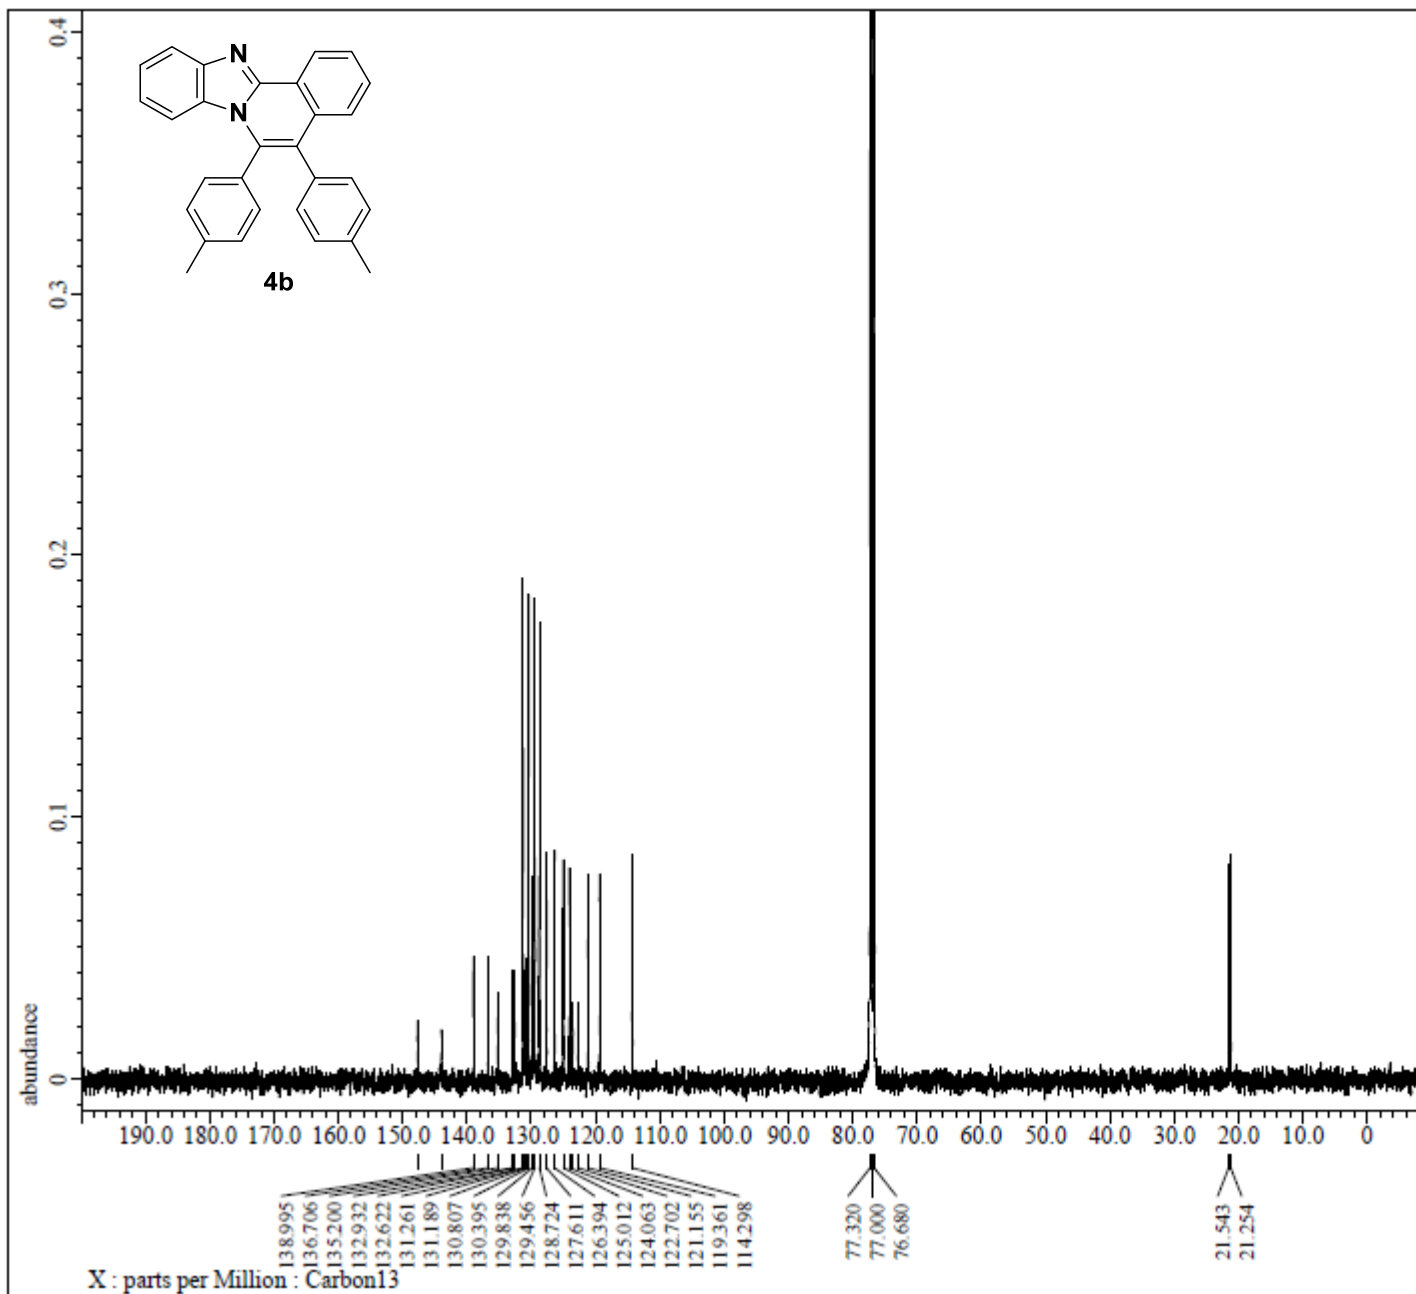

---- PROCESSING PARAMETERS ----  
 dc\_balance( 0, FALSE )  
 sexp( 2.0[Hz], 0.0[s] )  
 trapezoid( 0[%], 0[%], 80[%], 100[%] )  
 zerofill( 1 )  
 fft( 1, TRUE, TRUE )  
 machinephase  
 ppm

Filename = AS\_329\_column\_f15-18\_rc\_Ca  
 Author = delta  
 Experiment = carbon.jxp  
 Sample Id = AS\_329\_column\_f15-18\_rc  
 Solvent = CHLOROFORM-D  
 Creation Time = 18-MAY-2018 09:34:08  
 Revision Time = 21-MAY-2018 15:16:06  
 Current Time = 25-OCT-2018 09:13:41

Comment = AS\_329\_column\_f15-18\_rc  
 Data Format = 1D\_COMPLEX  
 Dim Size = 26214  
 Dim Title = Carbon13  
 Dim Units = [ppm]  
 Dimensions = X  
 Site = JNM-ECS400  
 Spectrometer = DELTA2\_NMR

Field Strength = 9.389766[T] (400[MHz])  
 X\_Acq\_Duration = 0.96468992[s]  
 X\_Domain = 13C  
 X\_Freq = 100.52530333[MHz]  
 X\_Offset = 100[ppm]  
 X\_Points = 32768  
 X\_Prescans = 4  
 X\_Resolution = 1.03660252[Hz]  
 X\_Sweep = 33.9673913[kHz]  
 X\_Sweep\_Clippped = 27.17391304[kHz]  
 Irr\_Domain = Proton  
 Irr\_Freq = 399.78219838[MHz]  
 Irr\_Offset = 5[ppm]  
 Clipped = FALSE  
 Scans = 1280  
 Total\_Scans = 1280

Relaxation\_Delay = 2[s]  
 Recvr\_Gain = 60  
 Temp\_Get = 20.3[dc]  
 X\_90\_Width = 14.5[us]  
 X\_Acq\_Time = 0.96468992[s]  
 X\_Angle = 30[deg]  
 X\_Atn = 7[db]  
 X\_Pulse = 4.83333333[us]  
 Irr\_Atn\_Dec = 21.5[db]  
 Irr\_Atn\_No = 21.5[db]  
 Irr\_Noise = WALTZ  
 Irr\_Width = 0.115[ms]  
 Decoupling = TRUE

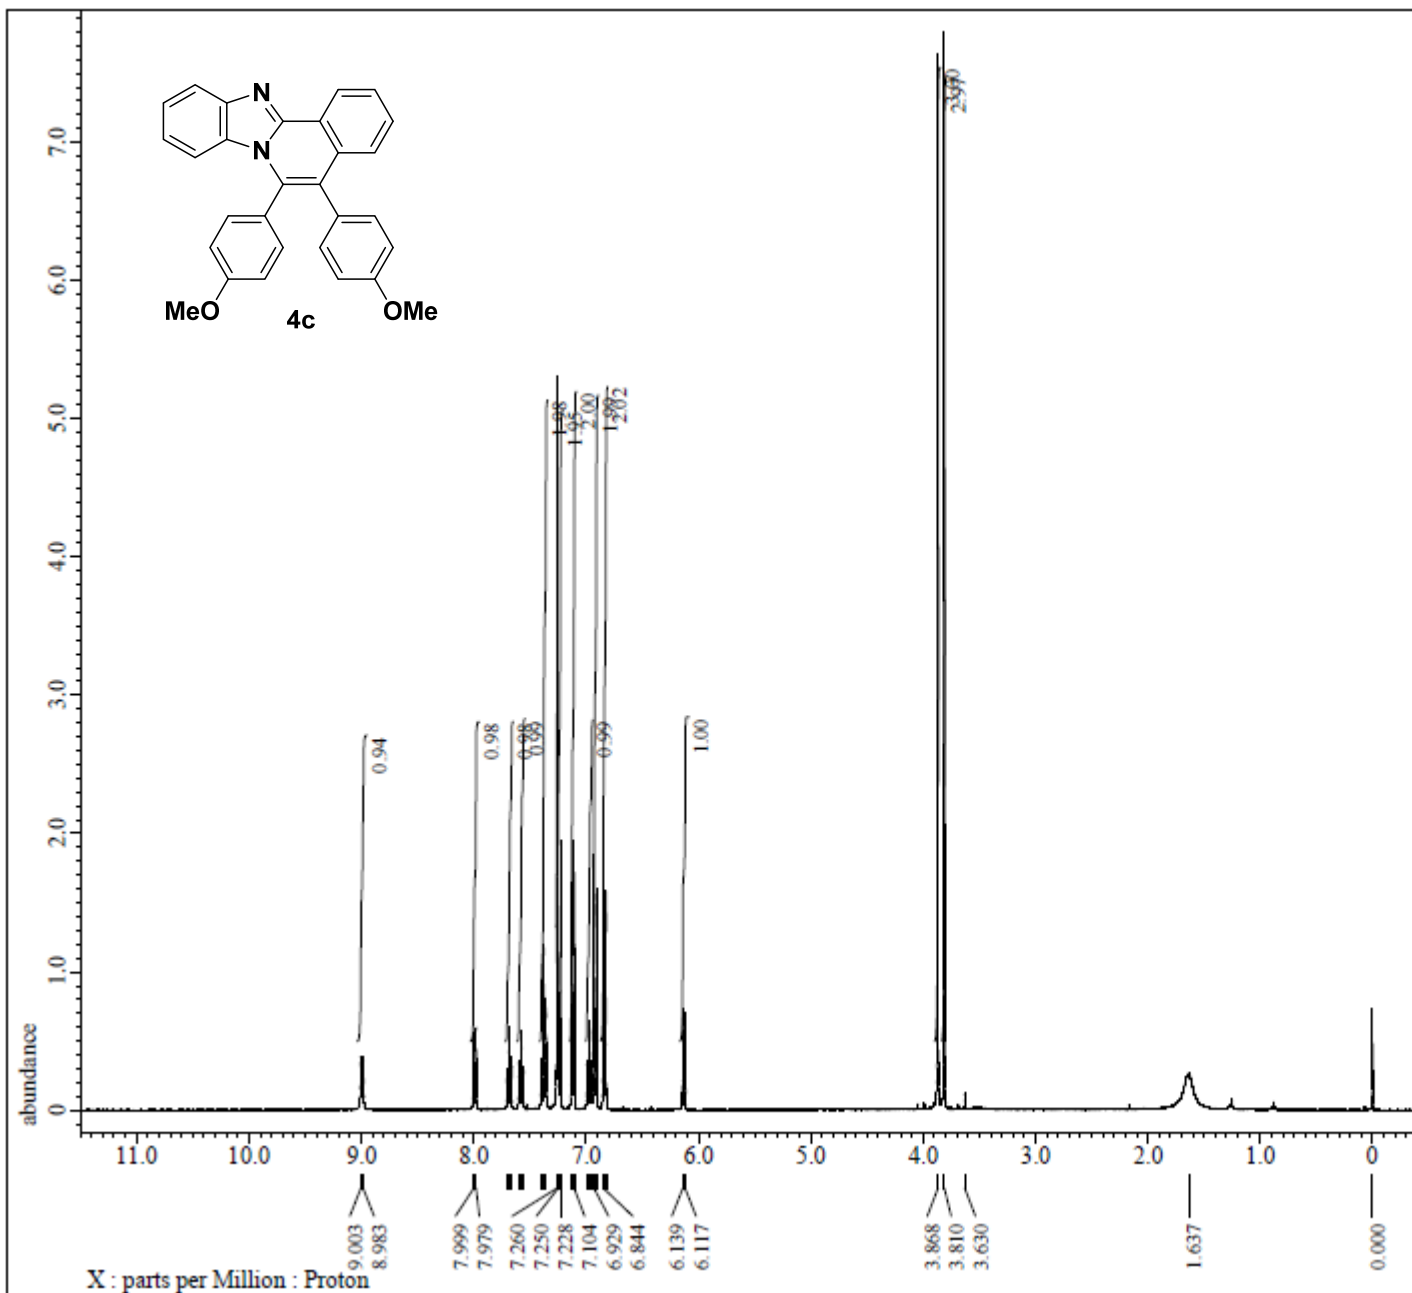

```

---- PROCESSING PARAMETERS ----
dc_balance( 0, FALSE )
sexp( 0.2[Hz], 0.0[s] )
trapezoid( 0[%], 0[%], 80[%], 100[%] )
zerofill( 2 )
fft( 1, TRUE, TRUE )
machinephase
ppm
reference( -0.01181[ppm], 0[ppm] )

```

```

Filename      = AS_342 column solid_Proton
Author        = delta
Experiment     = proton.jxp
Sample Id     = AS_342 column solid
Solvent       = CHLOROFORM-D
Creation Time  = 26-JUL-2018 21:37:24
Revision Time = 26-JUL-2018 23:13:58
Current_Time  = 25-OCT-2018 09:20:42

```

```

Comment       = AS_342 column solid
Data Format    = 1D_COMPLEX
Dim Size      = 26214
Dim Title     = Proton
Dim Units     = [ppm]
Dimensions    = X
Site         = JNM-ECS400
Spectrometer  = DELTA2_NMR

```

```

Field Strength = 9.389766[T] (400[MHz])
X_Acq_Duration = 2.18103808[s]
X_Domain       = 1H
X_Freq         = 399.78219838[MHz]
X_Offset       = 5[ppm]
X_Points       = 16384
X_Prescans     = 1
X_Resolution   = 0.45849727[Hz]
X_Sweep        = 7.51201923[kHz]
X_Sweep_Clipped = 6.00961538[kHz]
Irr_Domain     = Proton
Irr_Freq       = 399.78219838[MHz]
Irr_Offset     = 5[ppm]
Tri_Domain     = Proton
Tri_Freq       = 399.78219838[MHz]
Tri_Offset     = 5[ppm]
Clipped        = FALSE
Scans          = 64
Total_Scans    = 64

```

```

Relaxation_Delay = 5[s]
Recvr_Gain       = 50
Temp_Get         = 25.1[°C]
X_90_Width      = 11.5[us]
X_Acq_Time      = 2.18103808[s]
X_Angle         = 45[deg]
X_Atn           = 1.5[dB]
X_Pulse         = 5.75[us]
Irr_Mode        = Off
Tri_Mode        = Off

```



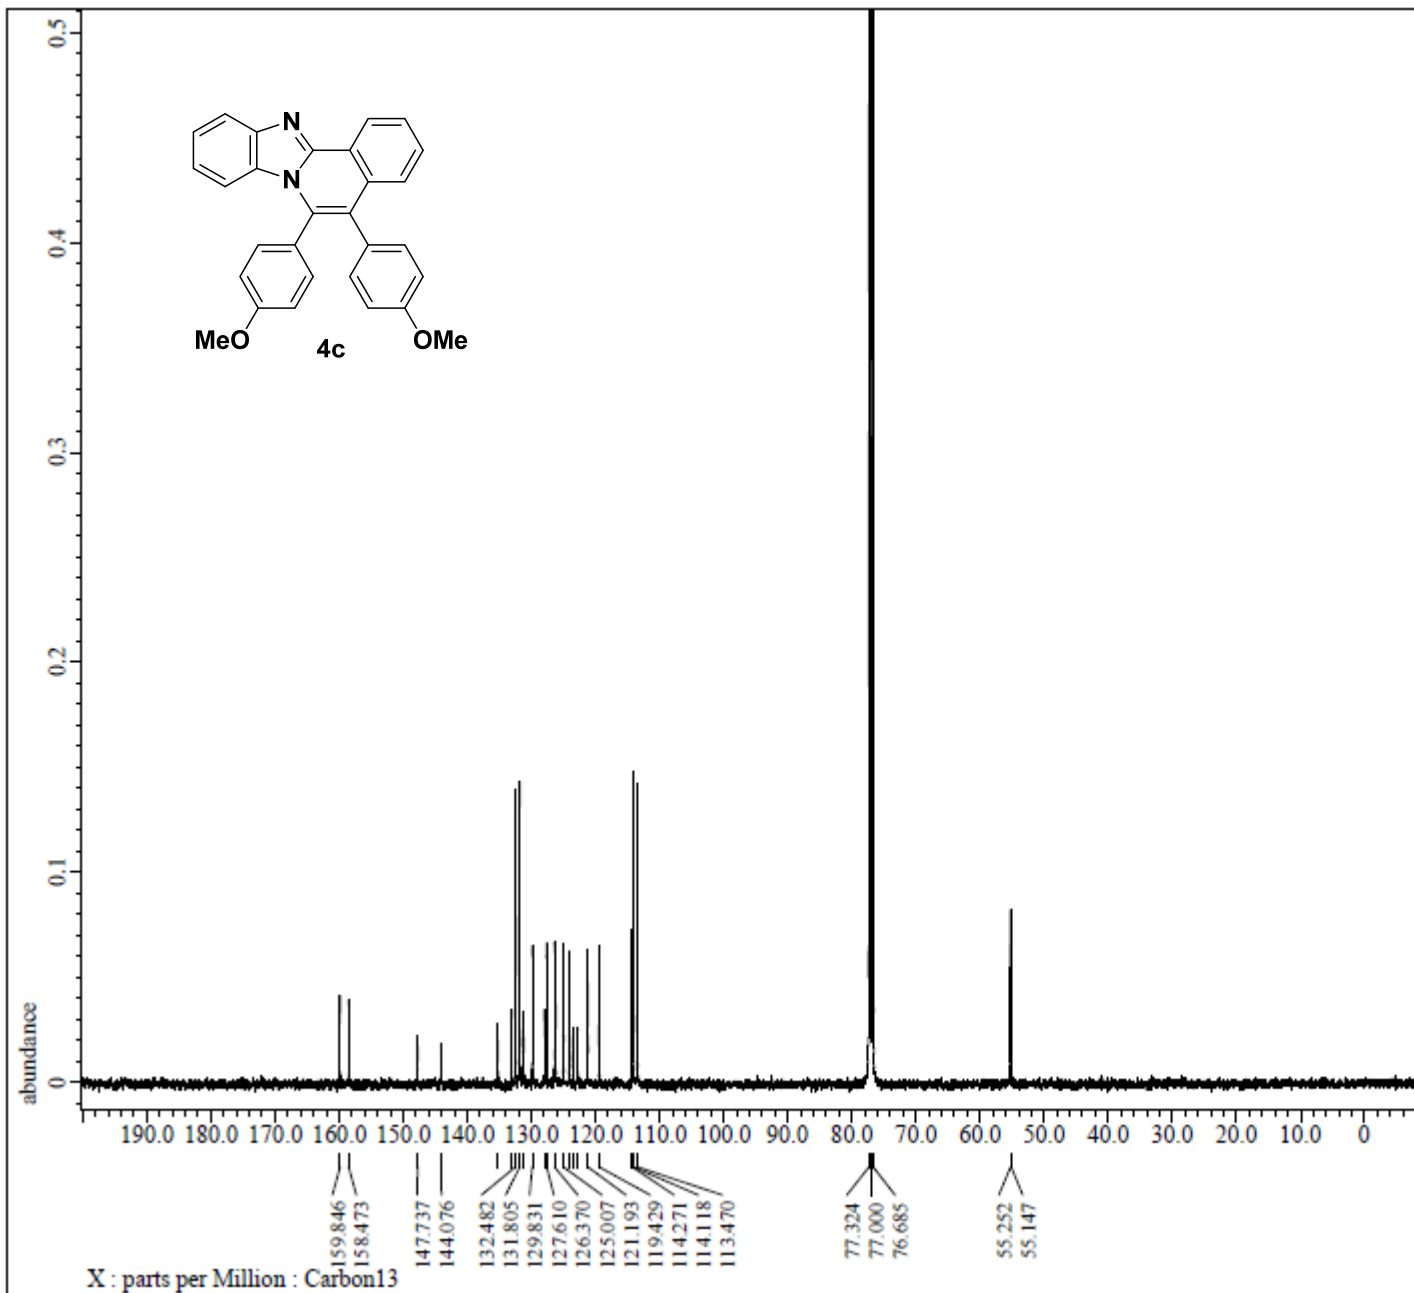

```

---- PROCESSING PARAMETERS ----
dc_balance( 0, FALSE )
sexp( 2.0[Hz], 0.0[s] )
trapezoid( 0[%], 0[%], 80[%], 100[%] )
zerofill( 1 )
fft( 1, TRUE, TRUE )
machinephase
ppm
  
```

```

Filename      = AS_342_rc_Carbon-2-2.jdf
Author        = delta
Experiment    = carbon.jxp
Sample Id     = AS_342_rc
Solvent       = CHLOROFORM-D
Creation_Time = 13-SEP-2018 23:06:06
Revision_Time = 14-SEP-2018 22:59:42
Current_Time  = 25-OCT-2018 09:19:59
  
```

```

Comment       = AS_342_rc
Data Format    = 1D_COMPLEX
Dim Size      = 26214
Dim Title     = Carbon13
Dim Units     = [ppm]
Dimensions    = X
Site          = JNM-ECS400
Spectrometer  = DELTA2_NMR

Field Strength = 9.389766[T] (400[MHz])
X_Acq_Duration = 1.04333312[s]
X_Domain      = 13C
X_Freq        = 100.52530333[MHz]
X_Offset      = 100[ppm]
X_Points      = 32768
X_Prescans    = 4
X_Resolution  = 0.95846665[Hz]
X_Sweep       = 31.40703518[kHz]
X_Sweep_Clipped = 25.12562814[kHz]
Irr_Domain    = Proton
Irr_Freq      = 399.78219838[MHz]
Irr_Offset    = 5[ppm]
Clipped       = FALSE
Scans         = 4096
Total_Scans   = 4096
  
```

```

Relaxation_Delay = 2[s]
Recvr_Gain       = 60
Temp_Get         = 20.2[dc]
X_90_Width      = 10.5[us]
X_Acq_Time      = 1.04333312[s]
X_Angle         = 30[deg]
X_Atn           = 6[dB]
X_Pulse         = 3.5[us]
Irr_Atn_Dec     = 21.5[dB]
Irr_Atn_Noise  = 21.5[dB]
Irr_Noise       = WALTZ
Irr_Pwidth      = 0.115[ms]
Decoupling      = TRUE
  
```

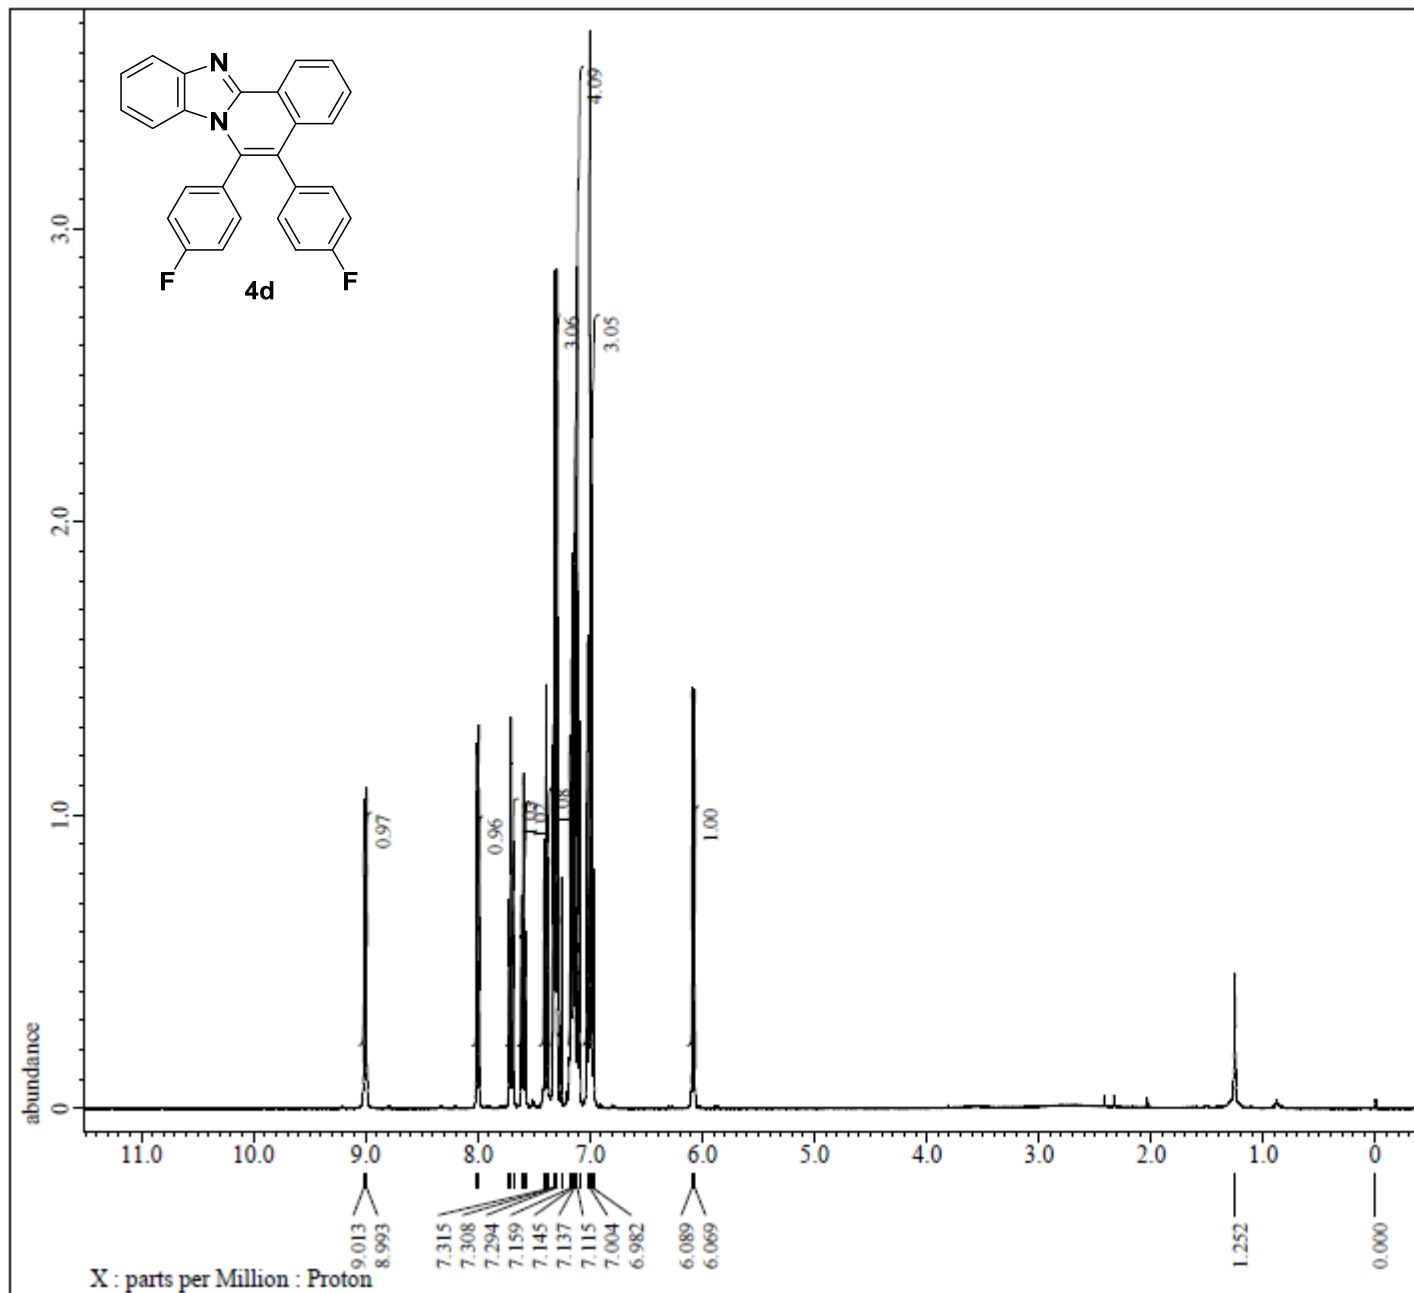

---- PROCESSING PARAMETERS ----  
 dc balance( 0, FALSE )  
 sexp( 0.2[Hz], 0.0[s] )  
 trapezoid( 0[%], 0[%], 80[%], 100[%] )  
 zerofill( 1 )  
 fft( 1, TRUE, TRUE )  
 machinephase  
 ppm

Filename = AS\_313 column rc 1\_Proton-  
 Author = delta  
 Experiment = proton.jxp  
 Sample\_Id = AS\_313 column rc 1  
 Solvent = CHLOROFORM-D  
 Creation\_Time = 26-JUL-2018 12:40:34  
 Revision\_Time = 26-JUL-2018 16:32:51  
 Current\_Time = 25-OCT-2018 09:08:10

Comment = AS\_313 column rc 1  
 Data\_Format = 1D\_COMPLEX  
 Dim\_Size = 13107  
 Dim\_Title = Proton  
 Dim\_Units = [ppm]  
 Dimensions = X  
 Site = JNM-ECS400  
 Spectrometer = DELTA2\_NMR

Field\_Strength = 9.389766[T] (400[MHz])  
 X\_Acq\_Duration = 2.18103808[s]  
 X\_Domain = 1H  
 X\_Freq = 399.78219838[MHz]  
 X\_Offset = 5[ppm]  
 X\_Points = 16384  
 X\_Prescans = 1  
 X\_Resolution = 0.45849727[Hz]  
 X\_Sweep = 7.51201923[kHz]  
 X\_Sweep\_Clippped = 6.00961538[kHz]  
 Irr\_Domain = Proton  
 Irr\_Freq = 399.78219838[MHz]  
 Irr\_Offset = 5[ppm]  
 Tri\_Domain = Proton  
 Tri\_Freq = 399.78219838[MHz]  
 Tri\_Offset = 5[ppm]  
 Clipped = FALSE  
 Scans = 8  
 Total\_Scans = 8

Relaxation\_Delay = 5[s]  
 Recvr\_Gain = 40  
 Temp\_Get = 25.4[dc]  
 X\_90\_Width = 11.5[us]  
 X\_Acq\_Time = 2.18103808[s]  
 X\_Angle = 45[deg]  
 X\_Atn = 1.5[db]  
 X\_Pulse = 5.75[us]  
 Irr\_Mode = Off  
 Tri\_Mode = Off

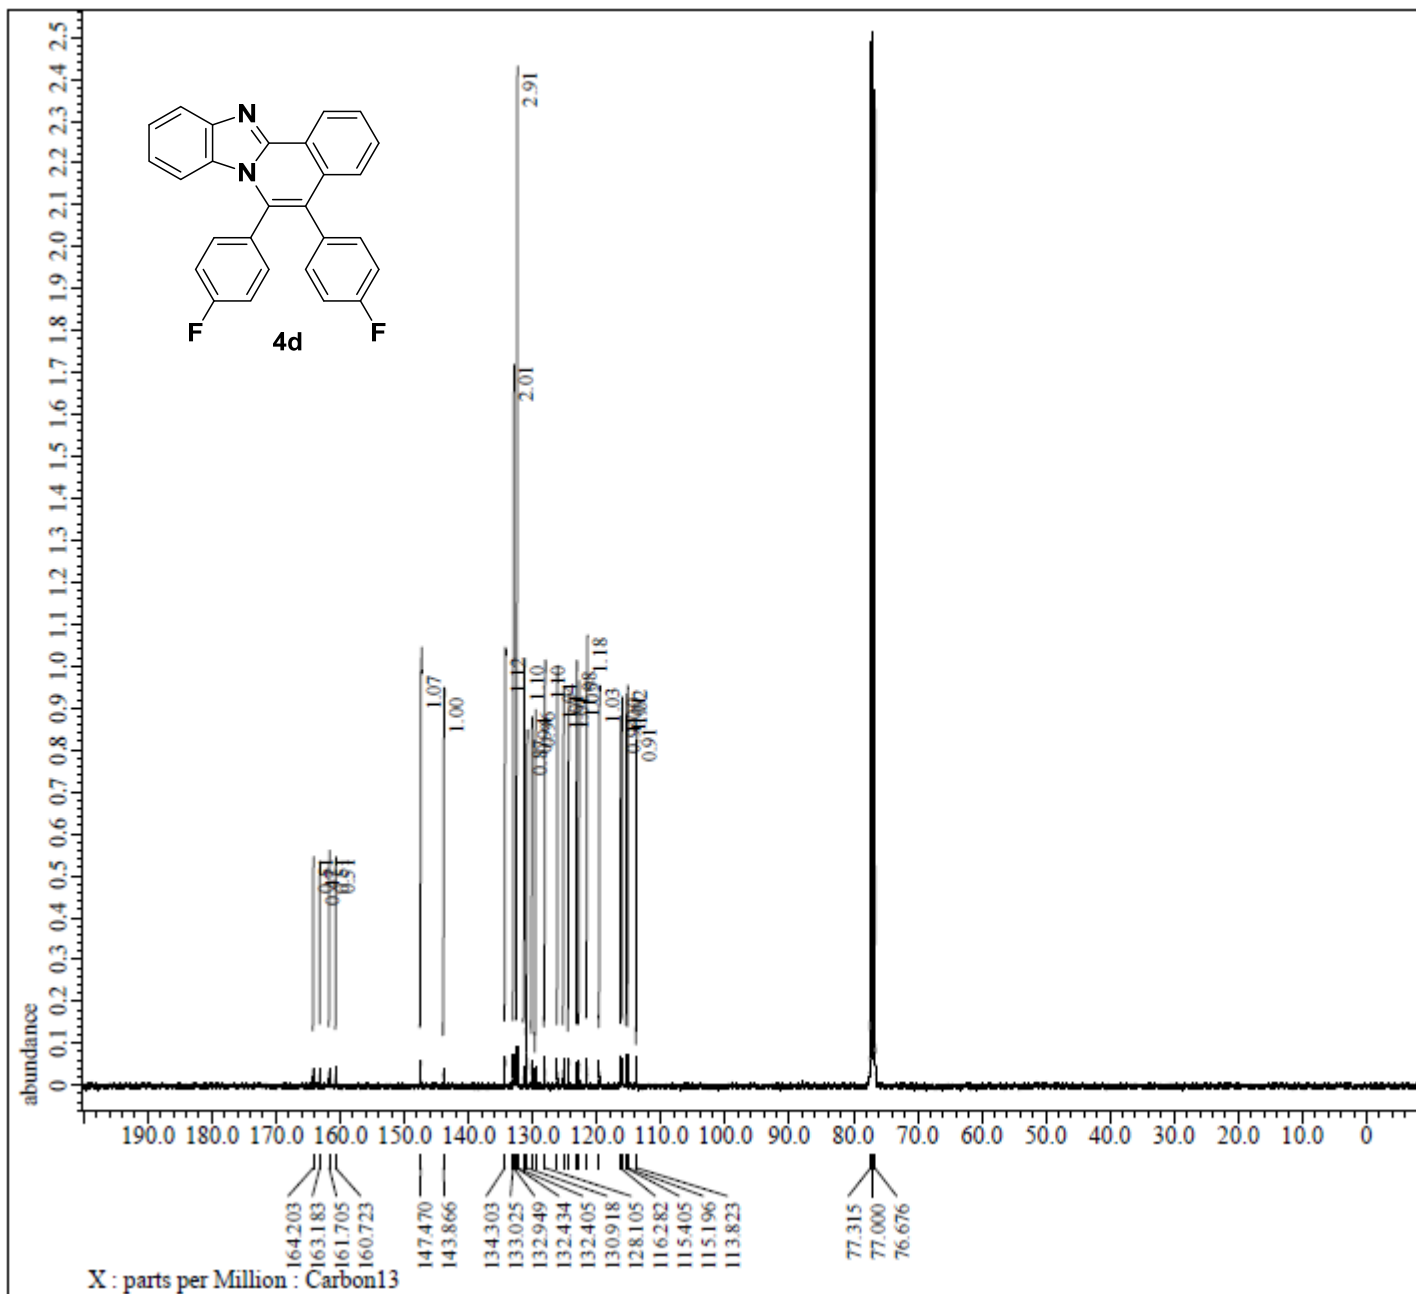

---- PROCESSING PARAMETERS ----  
 dc\_balance( 0, FALSE )  
 sexp( 2.0[Hz], 0.0[s] )  
 trapezoid( 0[%], 0[%], 80[%], 100[%] )  
 zerofill( 1 )  
 fft( 1, TRUE, TRUE )  
 machinephase  
 ppm

Filename = AS\_313 column rc 1\_Carbon-  
 Author = delta  
 Experiment = carbon.jxp  
 Sample\_Id = AS\_313 column rc 1  
 Solvent = CHLOROFORM-D  
 Creation\_Time = 27-JUL-2018 05:06:23  
 Revision\_Time = 27-JUL-2018 10:51:08  
 Current\_Time = 25-OCT-2018 09:07:31

Comment = AS\_313 column rc 1  
 Data\_Format = 1D\_COMPLEX  
 Dim\_Size = 26214  
 Dim\_Title = Carbon13  
 Dim\_Units = [ppm]  
 Dimensions = X  
 Site = JNM-ECS400  
 Spectrometer = DELTA2\_NMR

Field\_Strength = 9.389766[T] (400[MHz])  
 X\_Acq\_Duration = 1.0433312[s]  
 X\_Domain = 13C  
 X\_Freq = 100.52530333[MHz]  
 X\_Offset = 100[ppm]  
 X\_Points = 32768  
 X\_Prescans = 4  
 X\_Resolution = 0.95846665[Hz]  
 X\_Sweep = 31.40703518[kHz]  
 X\_Sweep\_Clippped = 25.12562814[kHz]  
 Irr\_Domain = Proton  
 Irr\_Freq = 399.78219838[MHz]  
 Irr\_Offset = 5[ppm]  
 Clipped = FALSE  
 Scans = 512  
 Total\_Scans = 512

Relaxation\_Delay = 30[s]  
 Recvr\_Gain = 60  
 Temp\_Get = 23.3[dc]  
 X\_90\_Width = 10.5[us]  
 X\_Acq\_Time = 1.0433312[s]  
 X\_Angle = 30[deg]  
 X\_Atn = 6[db]  
 X\_Pulse = 3.5[us]  
 Irr\_Atn\_Dec = 21.5[db]  
 Irr\_Noise = WALTZ  
 Irr\_Pwidth = 0.115[ms]  
 Decoupling = TRUE  
 Initial\_Wait = 1[s]

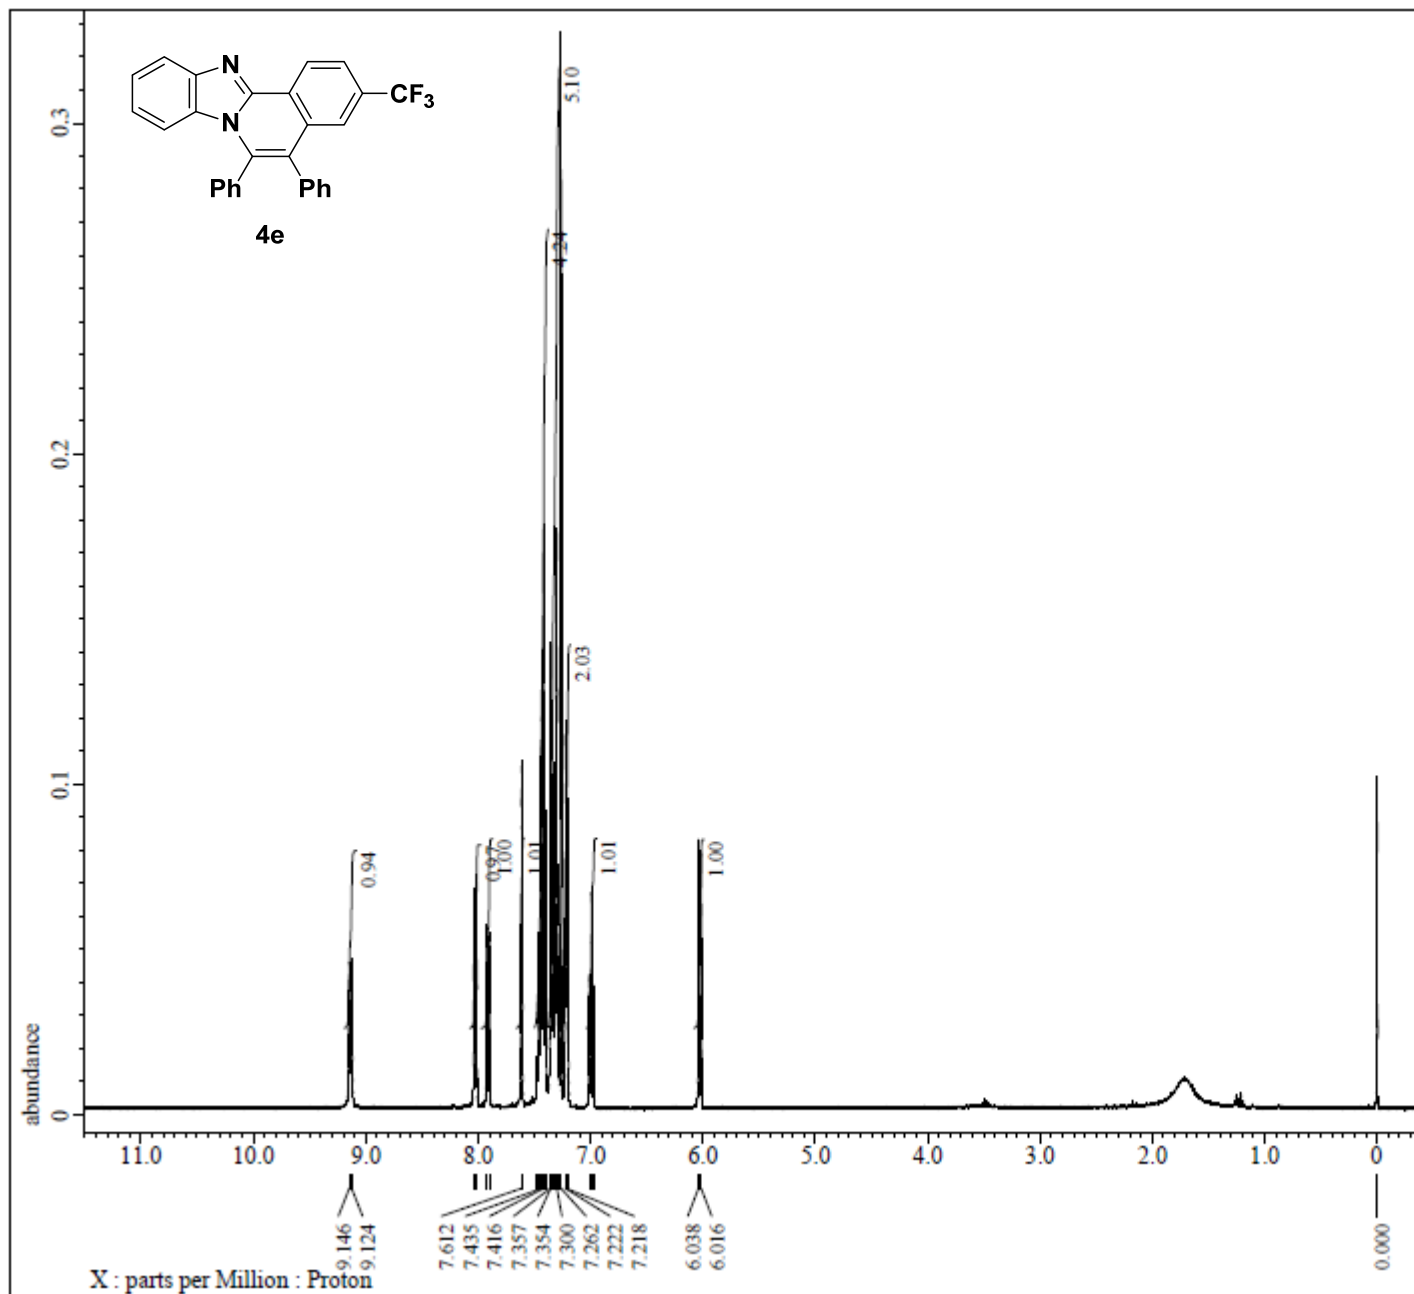

---- PROCESSING PARAMETERS ----  
 dc\_balance( 0, FALSE )  
 sexp( 0.2[Hz], 0.0[s] )  
 trapezoid( 0[%], 0[%], 80[%], 100[%] )  
 zerofill( 1 )  
 fft( 1, TRUE, TRUE )  
 machinephase  
 ppm

Filename = AS\_328 column F1\_Proton-1-  
 Author = delta  
 Experiment = proton.jxp  
 Sample\_Id = AS\_328 column F1  
 Solvent = CHLOROFORM-D  
 Creation\_Time = 6-JUN-2018 14:58:46  
 Revision\_Time = 25-OCT-2018 09:16:33  
 Current\_Time = 25-OCT-2018 09:16:41

Comment = AS\_328 column F1  
 Data\_Format = 1D\_COMPLEX  
 Dim\_Size = 26214  
 Dim\_Title = Proton  
 Dim\_Units = [ppm]  
 Dimensions = X  
 Site = JNM-ECS400  
 Spectrometer = DELTA2\_NMR

Field\_Strength = 9.389766[T] (400[MHz])  
 X\_Acq\_Duration = 4.36207616[s]  
 X\_Domain = 1H  
 X\_Freq = 399.78219838[MHz]  
 X\_Offset = 5[ppm]  
 X\_Points = 32768  
 X\_Prescans = 1  
 X\_Resolution = 0.22924863[Hz]  
 X\_Sweep = 7.51201923[kHz]  
 X\_Sweep\_Clippped = 6.00961538[kHz]  
 Irr\_Domain = Proton  
 Irr\_Freq = 399.78219838[MHz]  
 Irr\_Offset = 5[ppm]  
 Tri\_Domain = Proton  
 Tri\_Freq = 399.78219838[MHz]  
 Tri\_Offset = 5[ppm]  
 Clipped = FALSE  
 Scans = 8  
 Total\_Scans = 8

Relaxation\_Delay = 5[s]  
 Recvr\_Gain = 34  
 Temp\_Get = 19.2[dc]  
 X\_90\_Width = 11.5[us]  
 X\_Acq\_Time = 4.36207616[s]  
 X\_Angle = 45[deg]  
 X\_Atn = 1.5[db]  
 X\_Pulse = 5.75[us]  
 IIR\_Mode = Off  
 Tri\_Mode = Off

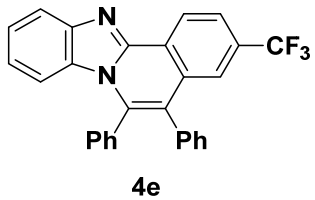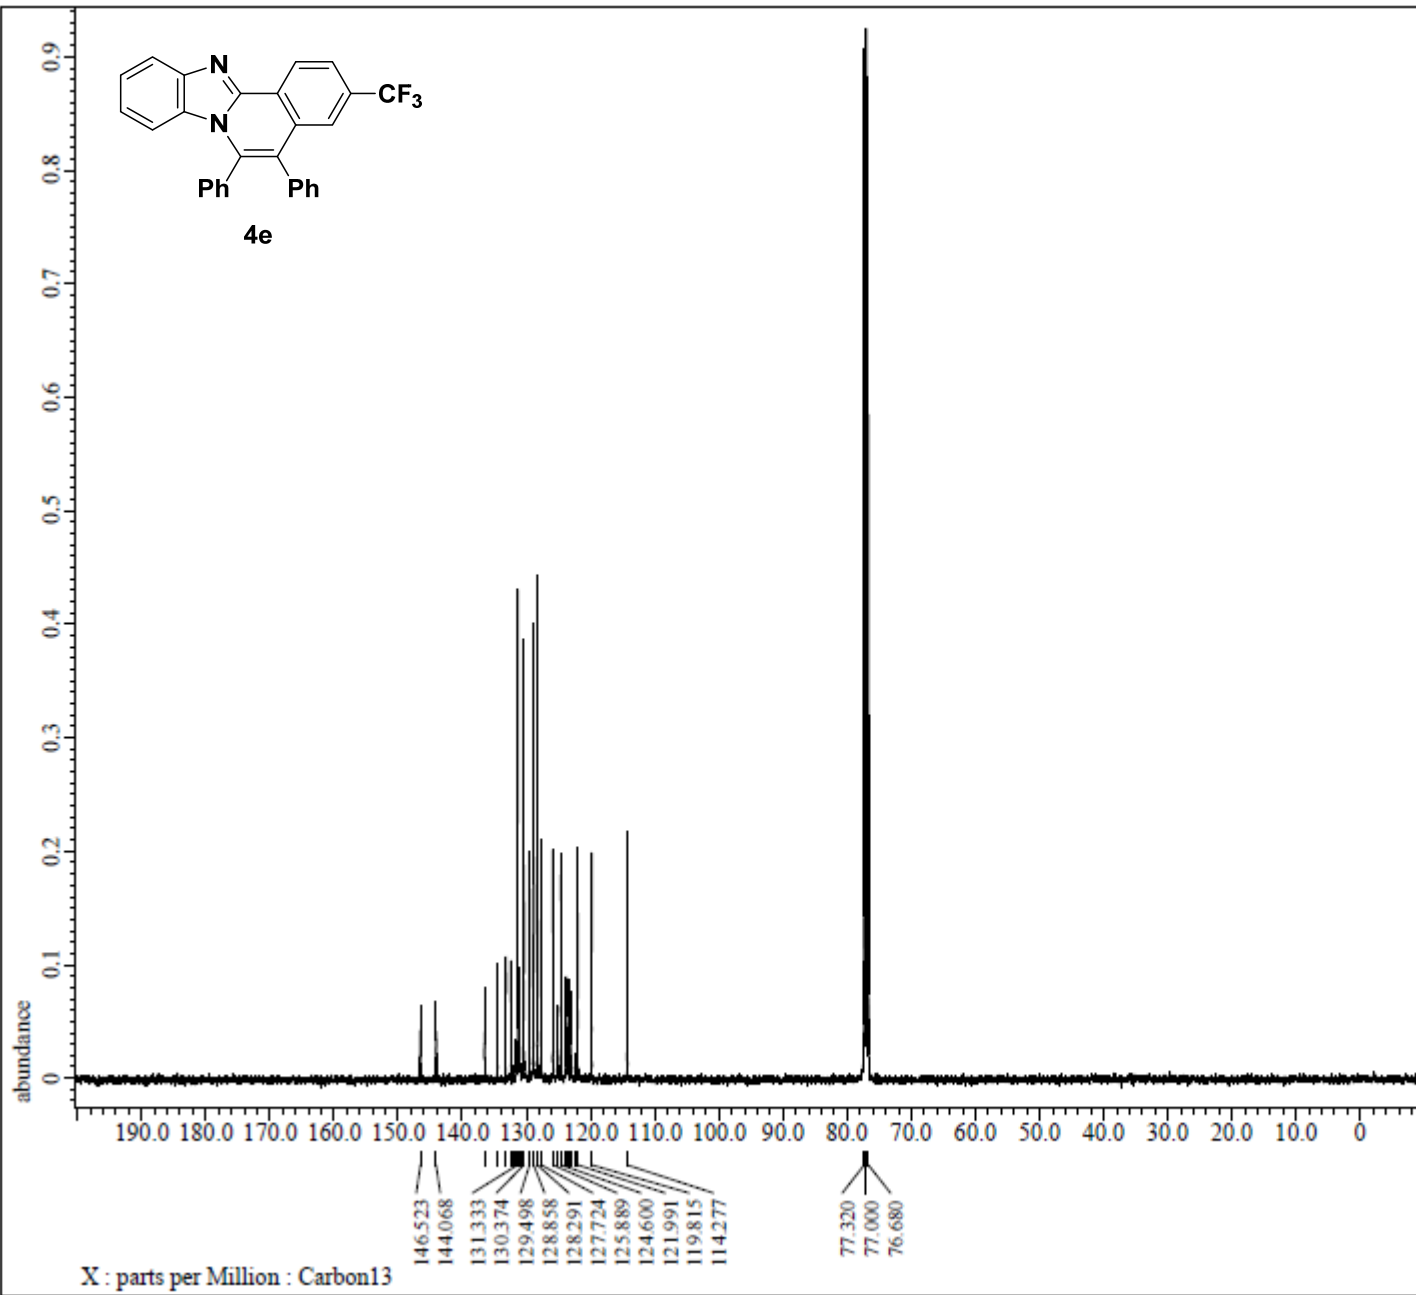

146.523  
144.068  
131.333  
130.374  
129.498  
128.858  
128.291  
127.724  
125.889  
124.600  
121.991  
119.815  
114.277  
77.320  
77.000  
76.680

```

---- PROCESSING PARAMETERS ----
dc balance( 0, FALSE )
sexp( 2.0[Hz], 0.0[s] )
trapezoid( 0[%], 0[%], 80[%], 100[%] )
zerofill( 1 )
fft( 1, TRUE, TRUE )
machinephase
ppm

```

```

Filename      = AS_328_column_f11-12_Carbo
Author       = delta
Experiment    = carbon.jxp
Sample_Id    = AS_328_column_f11-12
Solvent      = CHLOROFORM-D
Creation Time = 11-MAY-2018 02:08:05
Revision Time = 25-OCT-2018 09:15:27
Current_Time  = 25-OCT-2018 09:15:42

```

```

Comment      = AS_328_column_f11-12
Data Format   = 1D_COMPLEX
Dim_Size     = 26214
Dim_Title    = Carbon13
Dim_Units    = [ppm]
Dimensions   = X
Site         = JNM-ECS400
Spectrometer = DELTA2_NMR

```

```

Field_Strength = 9.389766[T] (400[MHz])
X_Acq_Duration = 0.96468992[s]
X_Domain       = 13C
X_Freq         = 100.52530333[MHz]
X_Offset       = 100[ppm]
X_Points       = 32768
X_Prescans     = 4
X_Resolution   = 1.03660252[Hz]
X_Sweep        = 33.9673913[kHz]
X_Sweep_Clipped = 27.17391304[kHz]
Irr_Domain     = Proton
Irr_Freq       = 399.78219838[MHz]
Irr_Offset     = 5[ppm]
Clipped        = FALSE
Scans          = 2048
Total_Scans    = 2048

```

```

Relaxation_Delay = 2[s]
Recvr_Gain       = 60
Temp_Get         = 17.5[dc]
X_90_Width       = 14.5[us]
X_Acq_Time       = 0.96468992[s]
X_Angle          = 30[deg]
X_Atn            = 7[db]
X_Pulse          = 4.83333333[us]
Irr_Atn_Dec      = 21.5[db]
Irr_Atn_Noise   = 21.5[db]
Irr_Noise        = WALTZ
Irr_Pwidth       = 0.115[ms]
Decoupling       = TRUE

```

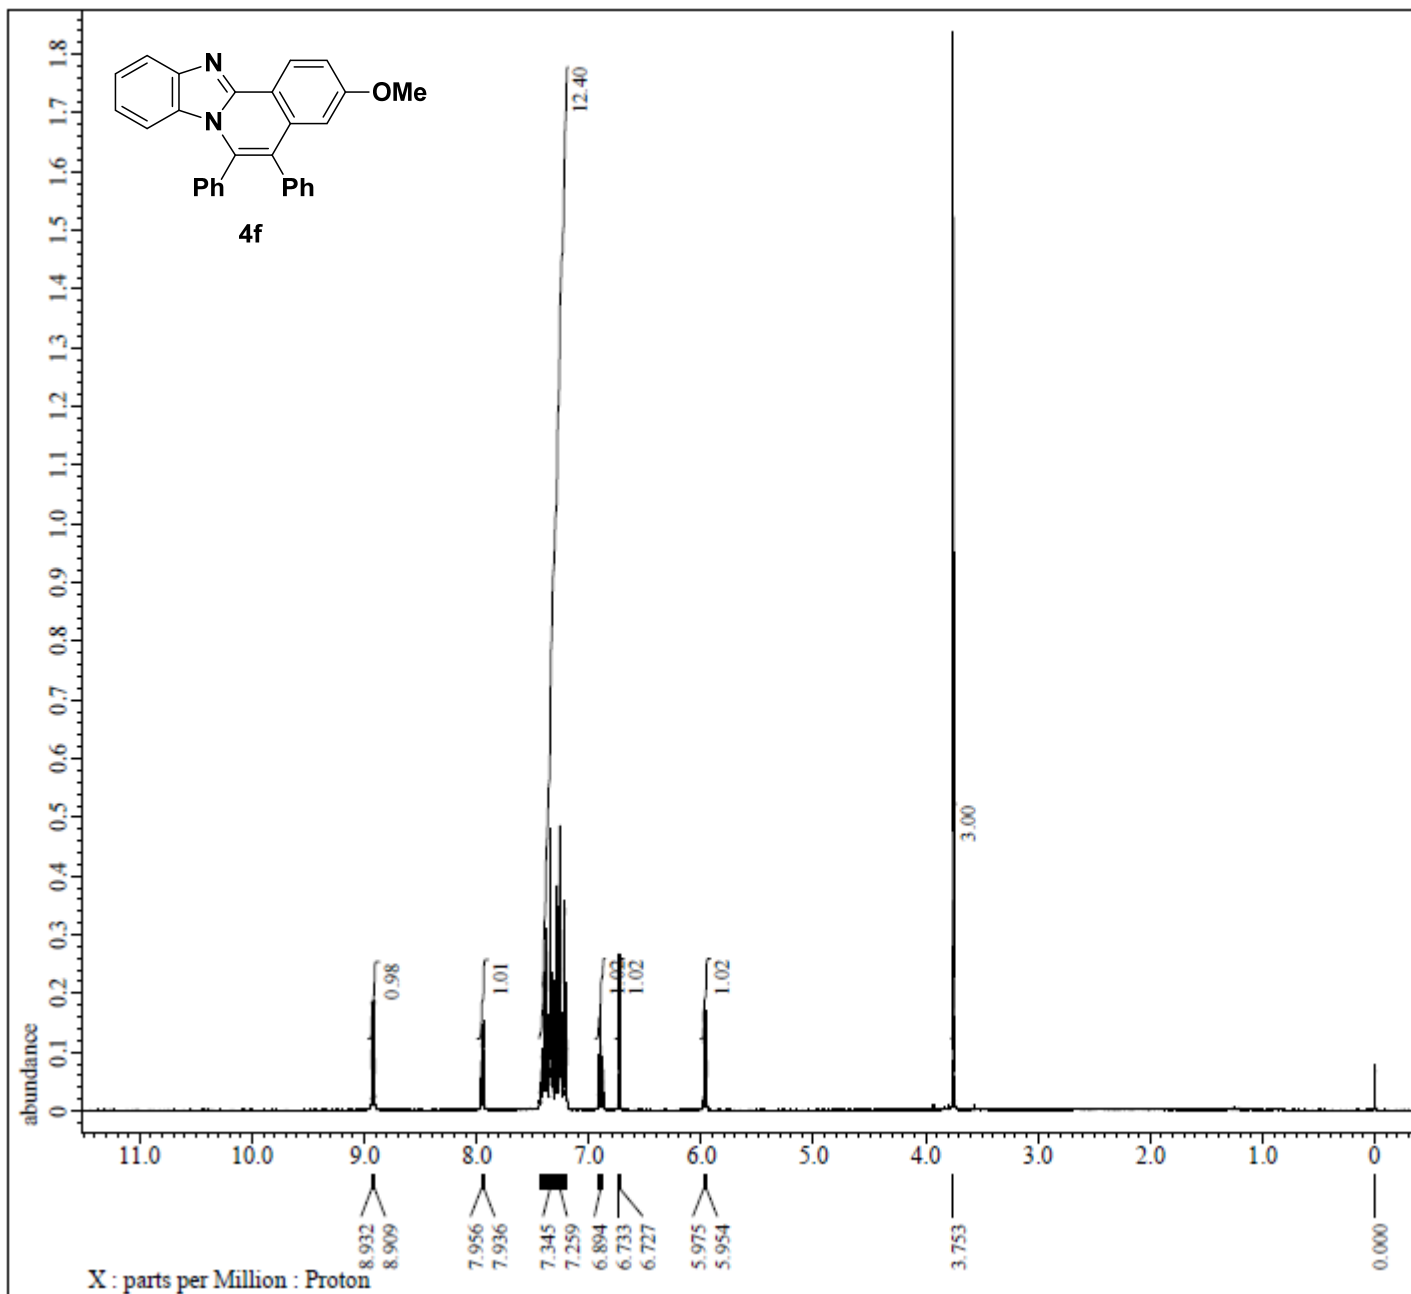

```

---- PROCESSING PARAMETERS ----
dc_balance( 0, FALSE )
sexp( 0.2[Hz], 0.0[s] )
trapezoid( 0[%], 0[%], 80[%], 100[%] )
zerofill( 1 )
fft( 1, TRUE, TRUE )
machinephase
ppm

```

```

Filename      = AS_321_column_2_column_1_f
Author        = delta
Experiment     = proton.jxp
Sample Id     = AS_321_column_2_column_1_f
Solvent       = CHLOROFORM-D
Creation Time  = 16-MAY-2018 21:25:32
Revision Time = 17-MAY-2018 21:13:25
Current Time  = 25-OCT-2018 09:09:51

```

```

Comment       = AS_321_column_2_column_1_f
Data Format    = 1D_COMPLEX
Dim Size      = 26214
Dim Title     = Proton
Dim Units     = [ppm]
Dimensions    = X
Site          = JNM-ECS400
Spectrometer  = DELTA2_NMR

```

```

Field Strength = 9.389766[T] (400[MHz])
X_Acq_Duration = 4.36207616[s]
X_Domain       = 1H
X_Freq         = 399.78219838[MHz]
X_Offset       = 5[ppm]
X_Points       = 32768
X_Prescans     = 1
X_Resolution   = 0.22924863[Hz]
X_Sweep        = 7.51201923[kHz]
X_Sweep_Clipped = 6.00961538[kHz]
Irr_Domain     = Proton
Irr_Freq       = 399.78219838[MHz]
Irr_Offset     = 5[ppm]
Tri_Domain     = Proton
Tri_Freq       = 399.78219838[MHz]
Tri_Offset     = 5[ppm]
Clipped        = FALSE
Scans          = 8
Total_Scans    = 8

```

```

Relaxation_Delay = 5[s]
Recvr_Gain       = 32
Temp_Get         = 20.2[dc]
X_90_Width       = 11.5[us]
X_Acq_Time       = 4.36207616[s]
X_Angle          = 45[deg]
X_Atn            = 1.5[dB]
X_Pulse          = 5.75[us]
Irr_Mode         = Off
Tri_Mode         = Off

```

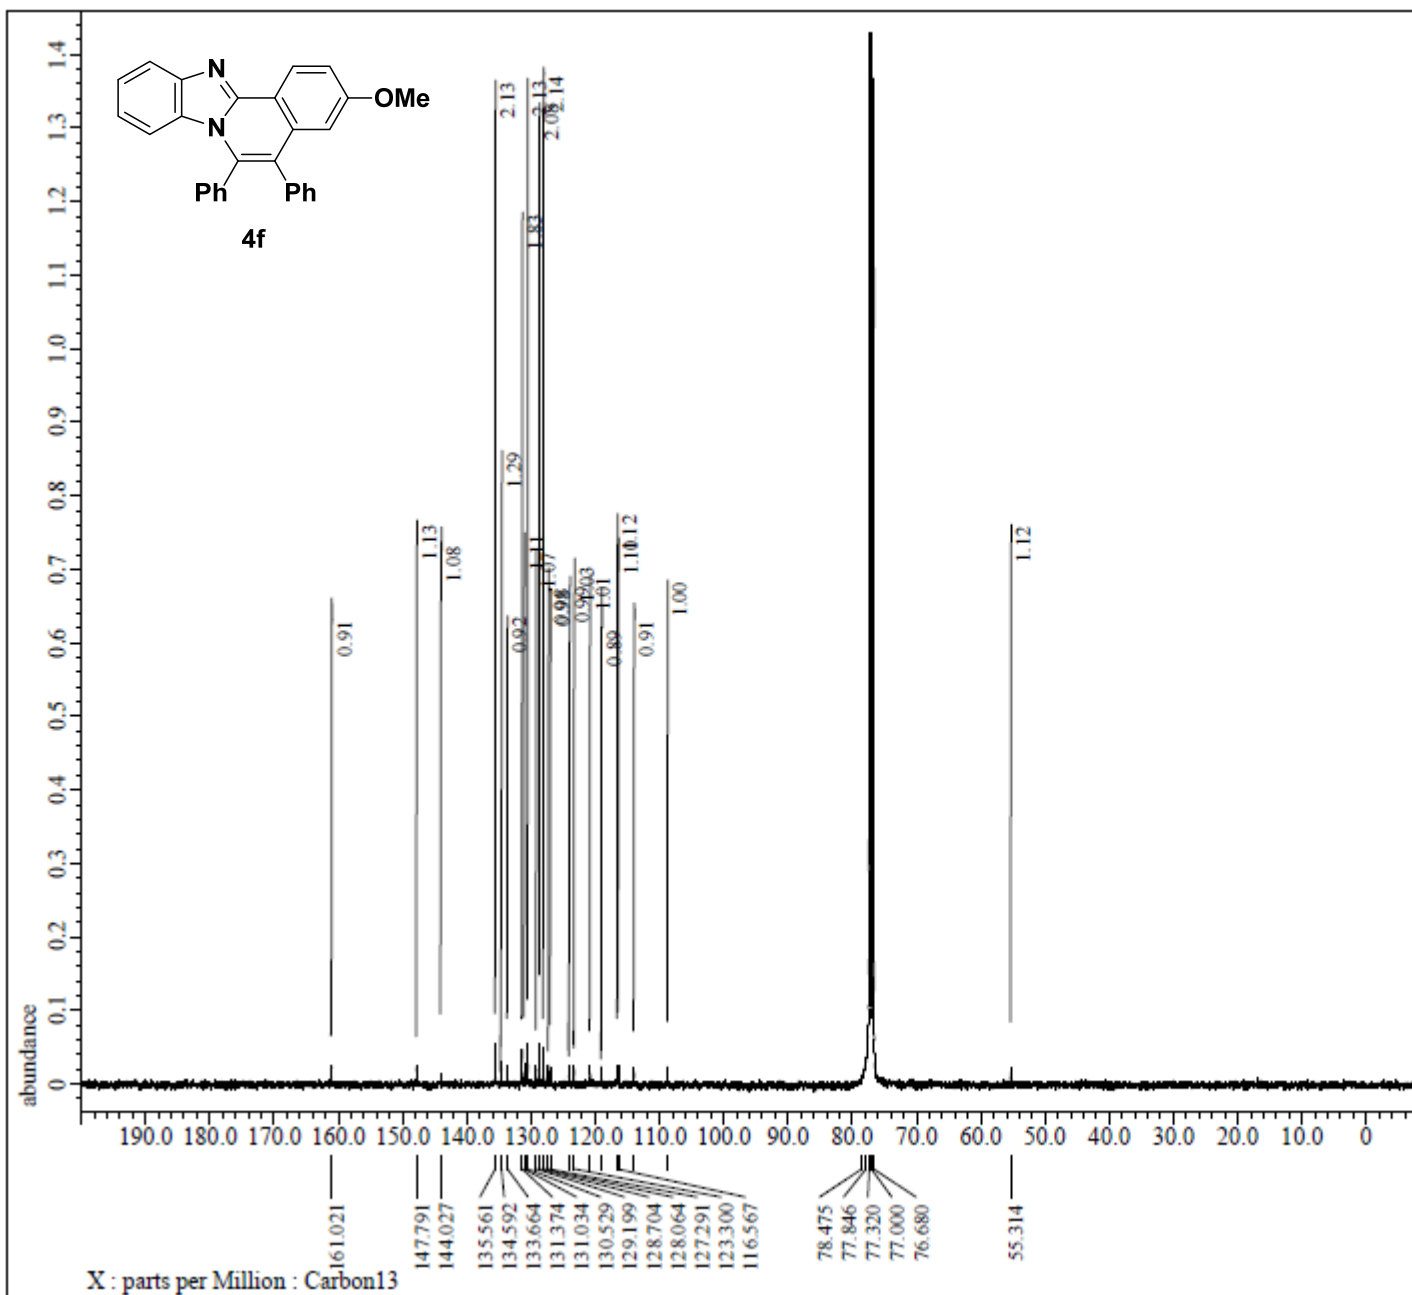

---- PROCESSING PARAMETERS ----  
 dc\_balance( 0, FALSE )  
 secp( 2.0[Hz], 0.0[s] )  
 trapezoid( 0[%], 0[%], 80[%], 100[%] )  
 zerofill( 1 )  
 fft( 1, TRUE, TRUE )  
 machinephase  
 ppm

Filename = AS\_321 column 2 f10-13\_Car  
 Author = delta  
 Experiment = carbon.jxp  
 Sample Id = AS\_321 column 2 f10-13  
 Solvent = CHLOROFORM-D  
 Creation\_Time = 26-MAY-2018 01:07:58  
 Revision\_Time = 29-MAY-2018 10:16:19  
 Current\_Time = 25-OCT-2018 09:11:13

Comment = AS\_321 column 2 f10-13  
 Data Format = 1D\_COMPLEX  
 Dim\_Size = 26214  
 Dim\_Title = Carbon13  
 Dim\_Units = [ppm]  
 Dimensions = X  
 Site = JNM-ECS400  
 Spectrometer = DELTA2\_NMR

Field\_Strength = 9.389766[T] (400[MHz])  
 X\_Acq\_Duration = 0.96468992[s]  
 X\_Domain = 13C  
 X\_Freq = 100.52530333[MHz]  
 X\_Offset = 100[ppm]  
 X\_Points = 32768  
 X\_Prescans = 4  
 X\_Resolution = 1.03660252[Hz]  
 X\_Sweep = 33.9673913[kHz]  
 X\_Sweep\_Clipped = 27.17391304[kHz]  
 Irr\_Domain = Proton  
 Irr\_Freq = 399.78219838[MHz]  
 Irr\_Offset = 5[ppm]  
 Clipped = FALSE  
 Scans = 1024  
 Total\_Scans = 1024

Relaxation\_Delay = 30[s]  
 Recvr\_Gain = 60  
 Temp\_Get = 18.9[dc]  
 X\_90\_Width = 14.5[us]  
 X\_Acq\_Time = 0.96468992[s]  
 X\_Angle = 30[deg]  
 X\_Atn = 7[dB]  
 X\_Pulse = 4.83333333[us]  
 Irr\_Atn\_Dec = 21.5[dB]  
 Irr\_Noise = WALTZ  
 Irr\_Pwidth = 0.115[ms]  
 Decoupling = TRUE  
 Initial\_Wait = 1[s]

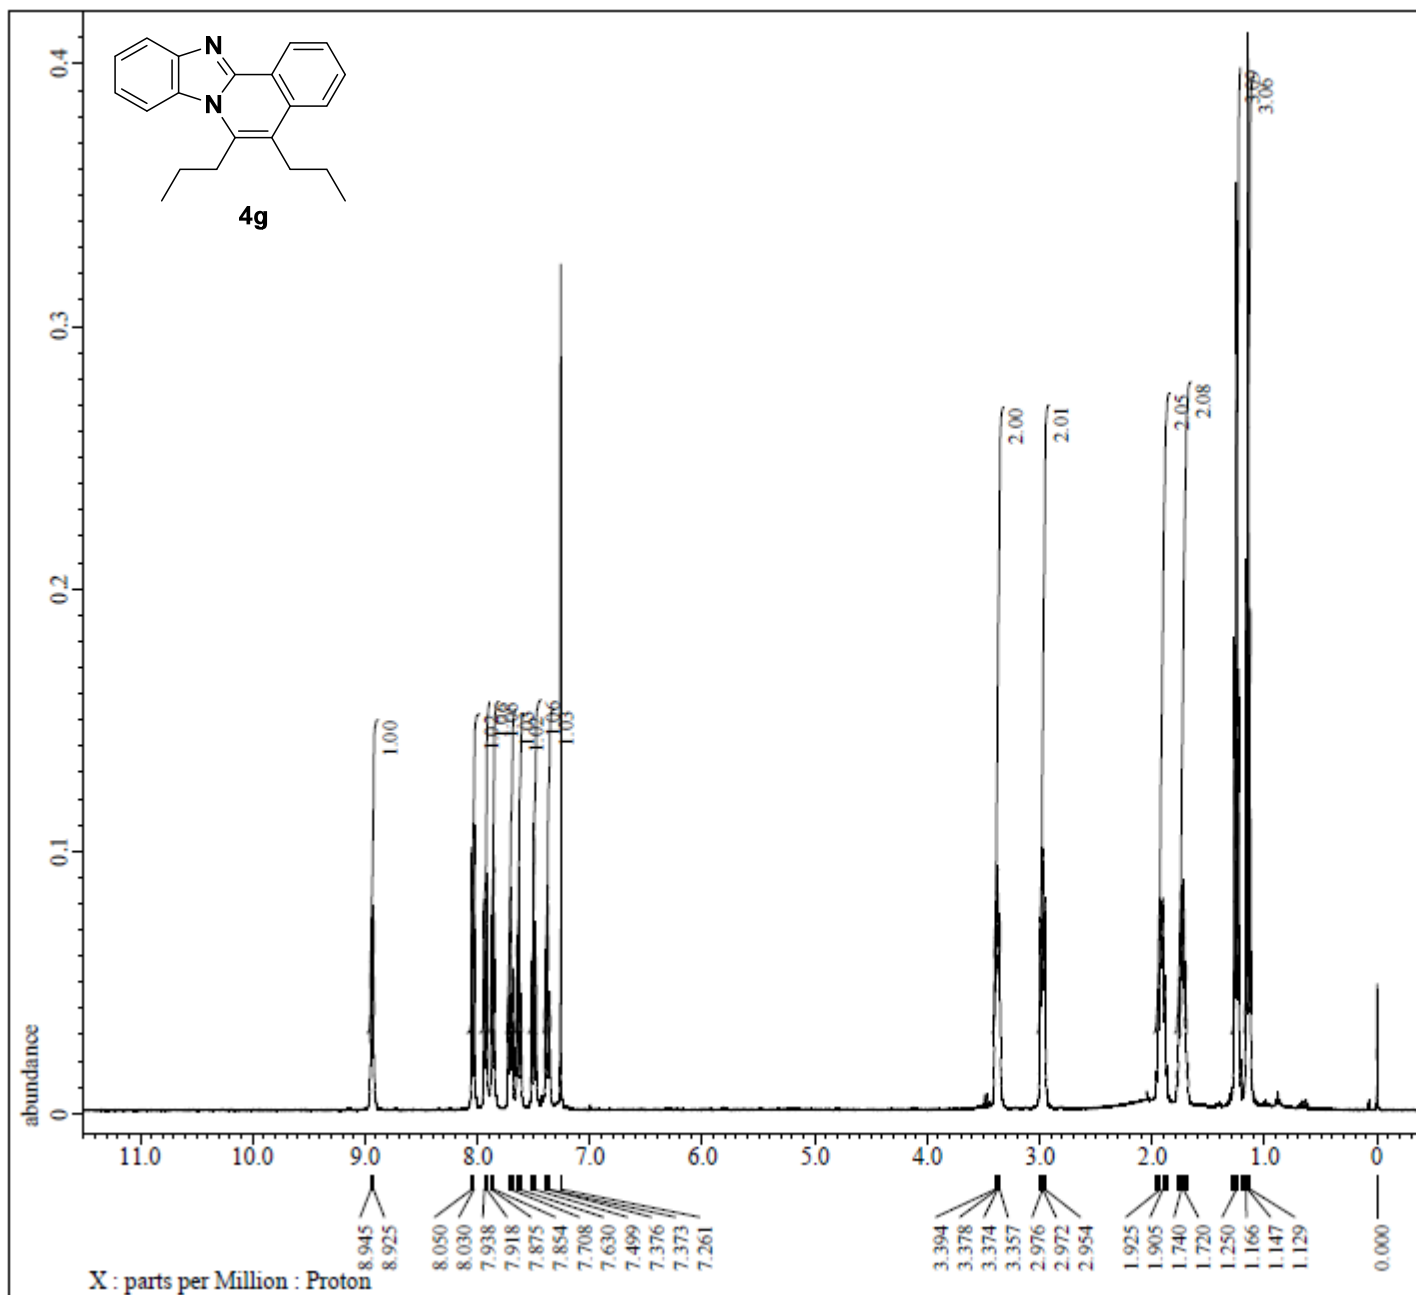

```

---- PROCESSING PARAMETERS ----
dc_balance( 0, FALSE )
sexp( 0.2[Hz], 0.0[s] )
trapezoid( 0[%, 0[%, 80[%, 100[%) )
zerofill( 2 )
fft( 1, TRUE, TRUE )
machinphase
ppm
reference( -0.01525[ppm], 0[ppm] )

```

```

Filename      = AS_338 column F1_Proton-1-
Author       = delta
Experiment    = proton.jxp
Sample Id     = AS_338 column F1
Solvent       = CHLOROFORM-D
Creation Time = 4-JUN-2018 10:59:15
Revision Time = 18-JUL-2018 15:35:34
Current Time  = 25-OCT-2018 09:28:17

```

```

Comment      = AS_338 column F1
Data Format   = 1D_COMPLEX
Dim Size     = 52429
Dim Title    = Proton
Dim Units    = [ppm]
Dimensions   = X
Site         = JNM-ECS400
Spectrometer = DELTA2_NMR

Field Strength = 9.389766[T] (400[MHz])
X_Acq_Duration = 4.36207616[s]
X_Domain       = 1H
X_Freq         = 399.78219838[MHz]
X_Offset       = 5[ppm]
X_Points      = 32768
X_Prescans    = 1
X_Resolution  = 0.22924863[Hz]
X_Sweep       = 7.51201923[kHz]
X_Sweep_Clipped = 6.00961538[kHz]
Irr_Domain    = Proton
Irr_Freq      = 399.78219838[MHz]
Irr_Offset    = 5[ppm]
Tri_Domain    = Proton
Tri_Freq      = 399.78219838[MHz]
Tri_Offset    = 5[ppm]
Clipped       = FALSE
Scans         = 8
Total_Scans   = 8

```

```

Relaxation_Delay = 5[s]
Recvr_Gain       = 32
Temp_Get         = 18.6[dC]
X_90_Width      = 11.5[us]
X_Acq_Time      = 4.36207616[s]
X_Angle         = 45[deg]
X_Atn           = 1.5[dB]
X_Pulse         = 5.75[us]
Irr_Mode        = Off
Tri_Mode        = Off

```



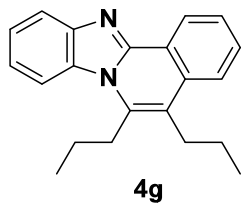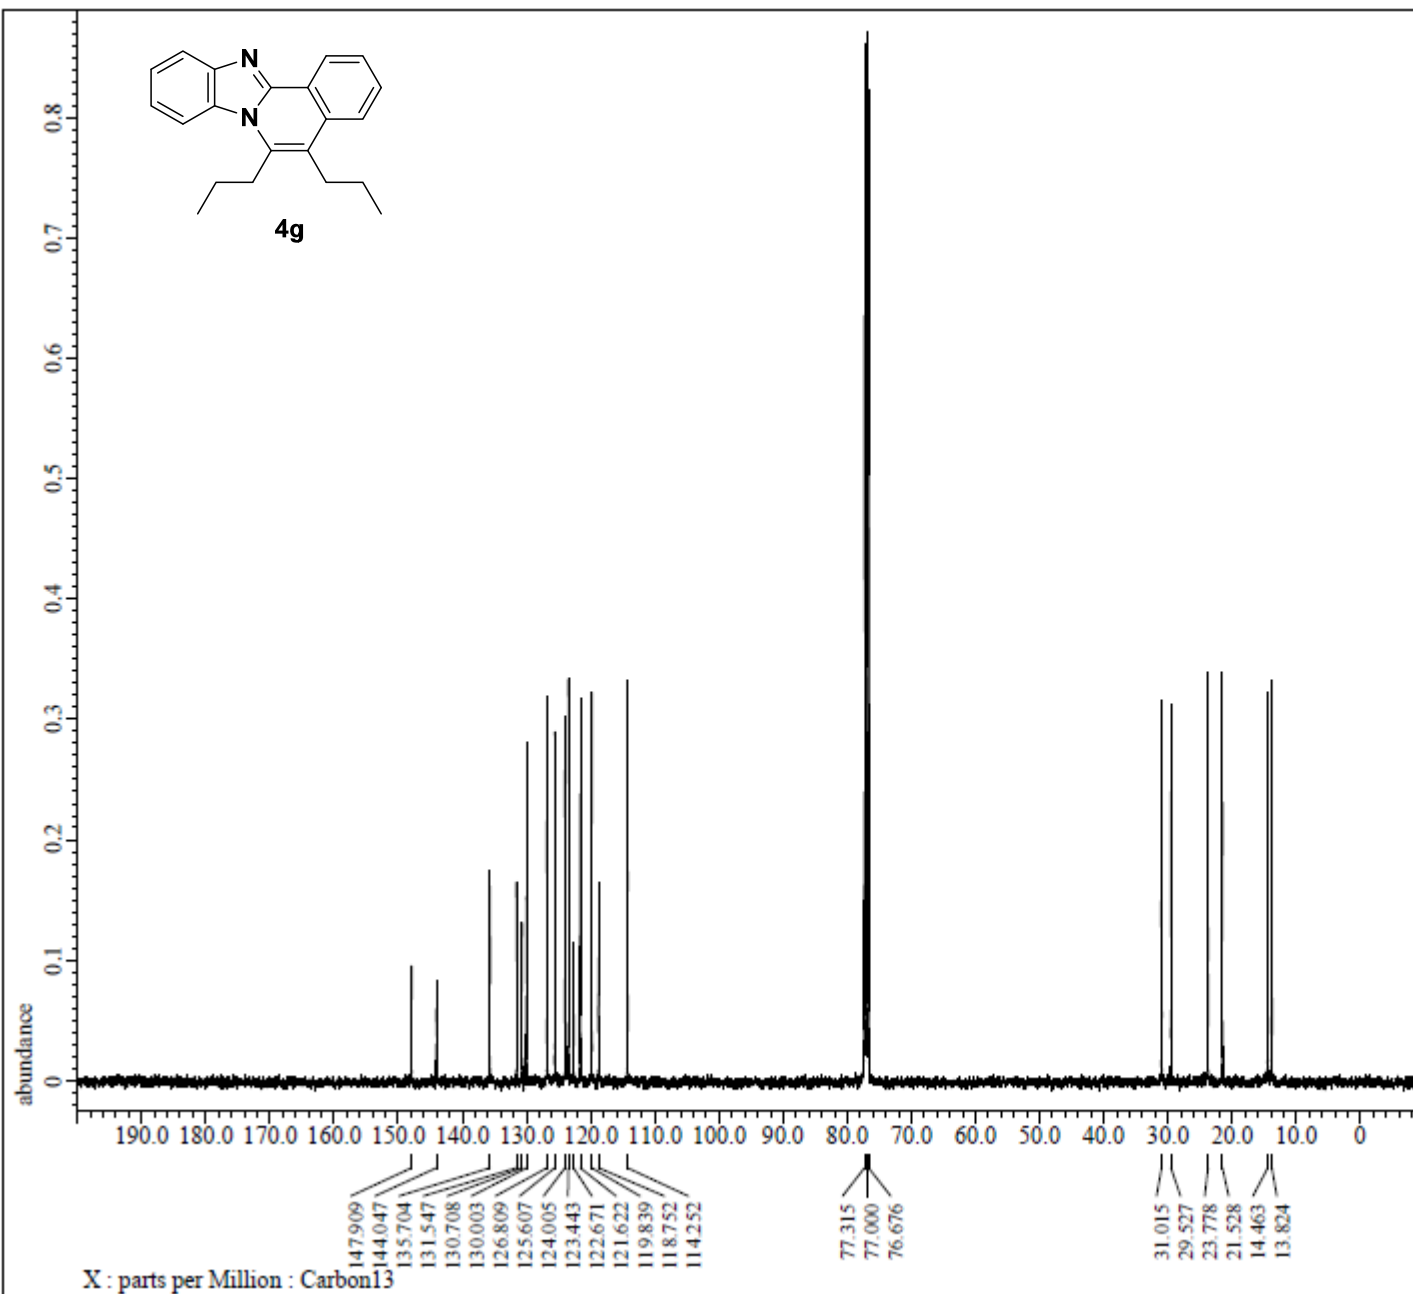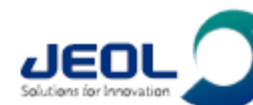

```

---- PROCESSING PARAMETERS ----
dc_balance( 0, FALSE )
sexp( 2.0[Hz], 0.0[s] )
trapezoid( 0[%], 0[%], 80[%], 100[%] )
zerofill( 1 )
fft( 1, TRUE, TRUE )
machinephase
ppm
  
```

```

Filename      = AS_338_column_F1_Carbon-1-
Author        = delta
Experiment    = carbon.jxp
Sample Id     = AS_338_column_F1
Solvent       = CHLOROFORM-D
Creation Time = 17-JUL-2018 22:40:04
Revision Time = 25-OCT-2018 09:31:02
Current Time  = 25-OCT-2018 09:31:36
  
```

```

Comment       = AS_338_column_F1
Data Format    = 1D_COMPLEX
Dim Size      = 26214
Dim Title     = Carbon13
Dim Units     = [ppm]
Dimensions    = X
Site          = JNM-ECS400
Spectrometer  = DELTA2_NMR
  
```

```

Field Strength = 9.389766[T] (400[MHz])
X_Acq_Duration = 1.04333312[s]
X_Domain       = 13C
X_Freq         = 100.52530333[MHz]
X_Offset       = 100[ppm]
X_Points       = 32768
X_Prescans     = 4
X_Resolution   = 0.95846665[Hz]
X_Sweep        = 31.40703518[kHz]
X_Sweep_Clippped = 25.12562814[kHz]
Irr_Domain     = Proton
Irr_Freq       = 399.78219838[MHz]
Irr_Offset     = 5[ppm]
Clipped        = FALSE
Scans          = 1024
Total_Scans    = 1024
  
```

```

Relaxation Delay = 2[s]
Recvr_Gain       = 60
Temp_Get         = 25.1[dc]
X_90_Width      = 10.5[us]
X_Acq_Time      = 1.04333312[s]
X_Angle         = 30[deg]
X_Atn           = 6[db]
X_Pulse         = 3.5[us]
Irr_Atn_Dec     = 21.5[db]
Irr_Atn_No     = 21.5[db]
Irr_Noise       = WALTZ
Irr_Pwidth      = 0.115[ms]
Decoupling      = TRUE
  
```

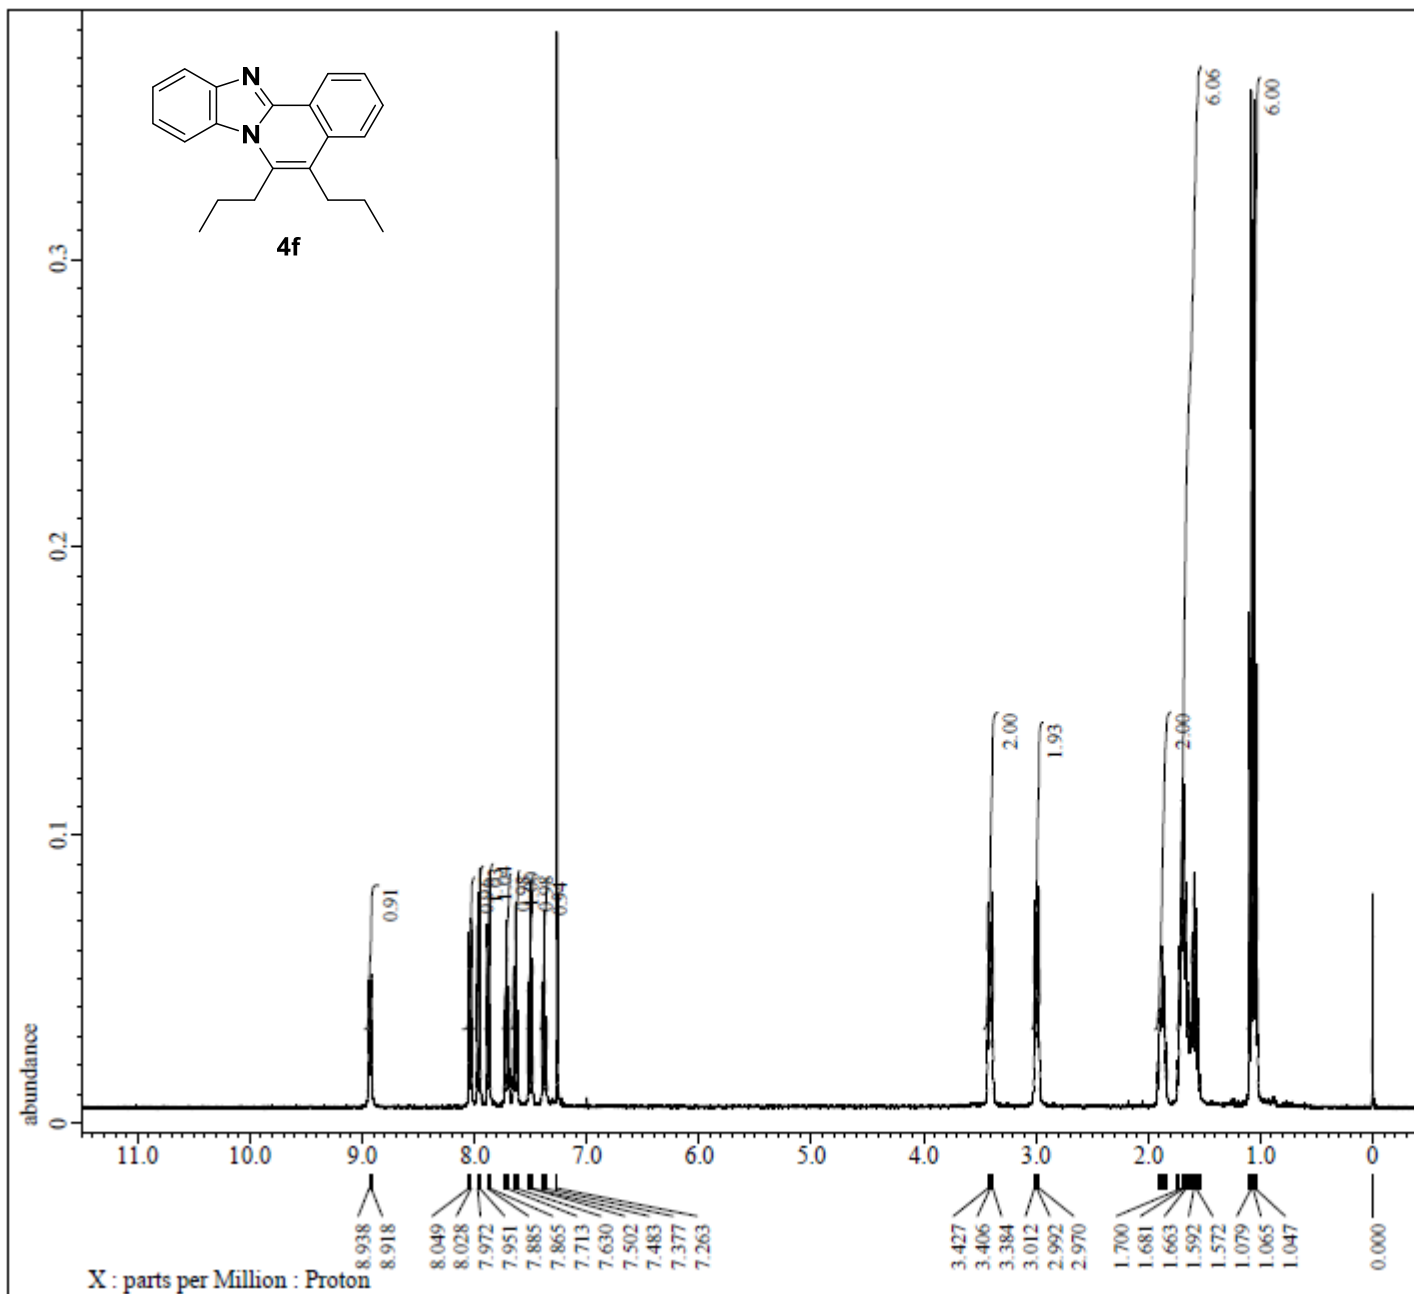

----- PROCESSING PARAMETERS -----  
 dc\_balance( 0, FALSE )  
 sexp( 0.2[Hz], 0.0[s] )  
 trapezoid( 0[%], 0[%], 80[%], 100[%] )  
 zerofill( 1 )  
 fft( 1, TRUE, TRUE )  
 machinephase  
 ppm

Filename = AS 311 column f29-36 HPLC  
 Author = delta  
 Experiment = proton.jxp  
 Sample\_Id = AS 311 column f29-36 HPLC  
 Solvent = CHLOROFORM-D  
 Creation\_Time = 1-MAR-2018 21:14:29  
 Revision\_Time = 7-JUN-2018 22:58:25  
 Current\_Time = 25-OCT-2018 09:06:19

Comment = AS 311 column f29-36 HPLC  
 Data Format = 1D\_COMPLEX  
 Dim\_Size = 13107  
 Dim\_Title = Proton  
 Dim\_Units = [ppm]  
 Dimensions = X  
 Site = JNM-ECS400  
 Spectrometer = DELTA2\_NMR

Field Strength = 9.389766[T] (400[MHz])  
 X\_Acq\_Duration = 2.18103808[s]  
 X\_Domain = 1H  
 X\_Freq = 399.78219838[MHz]  
 X\_Offset = 5[ppm]  
 X\_Points = 16384  
 X\_Prescans = 1  
 X\_Resolution = 0.45849727[Hz]  
 X\_Sweep = 7.51201923[kHz]  
 X\_Sweep\_Clippped = 6.00961538[kHz]  
 Irr\_Domain = Proton  
 Irr\_Freq = 399.78219838[MHz]  
 Irr\_Offset = 5[ppm]  
 Tri\_Domain = Proton  
 Tri\_Freq = 399.78219838[MHz]  
 Tri\_Offset = 5[ppm]  
 Clipped = FALSE  
 Scans = 8  
 Total\_Scans = 8

Relaxation\_Delay = 5[s]  
 Recvr\_Gain = 32  
 Temp\_Get = 460.0[dc]  
 X\_90\_Width = 11.1[us]  
 X\_Acq\_Time = 2.18103808[s]  
 X\_Angle = 45[deg]  
 X\_Atn = 1[dB]  
 X\_Pulse = 5.55[us]  
 Irr\_Mode = Off  
 Tri\_Mode = Off

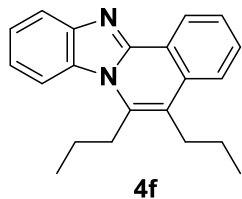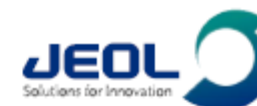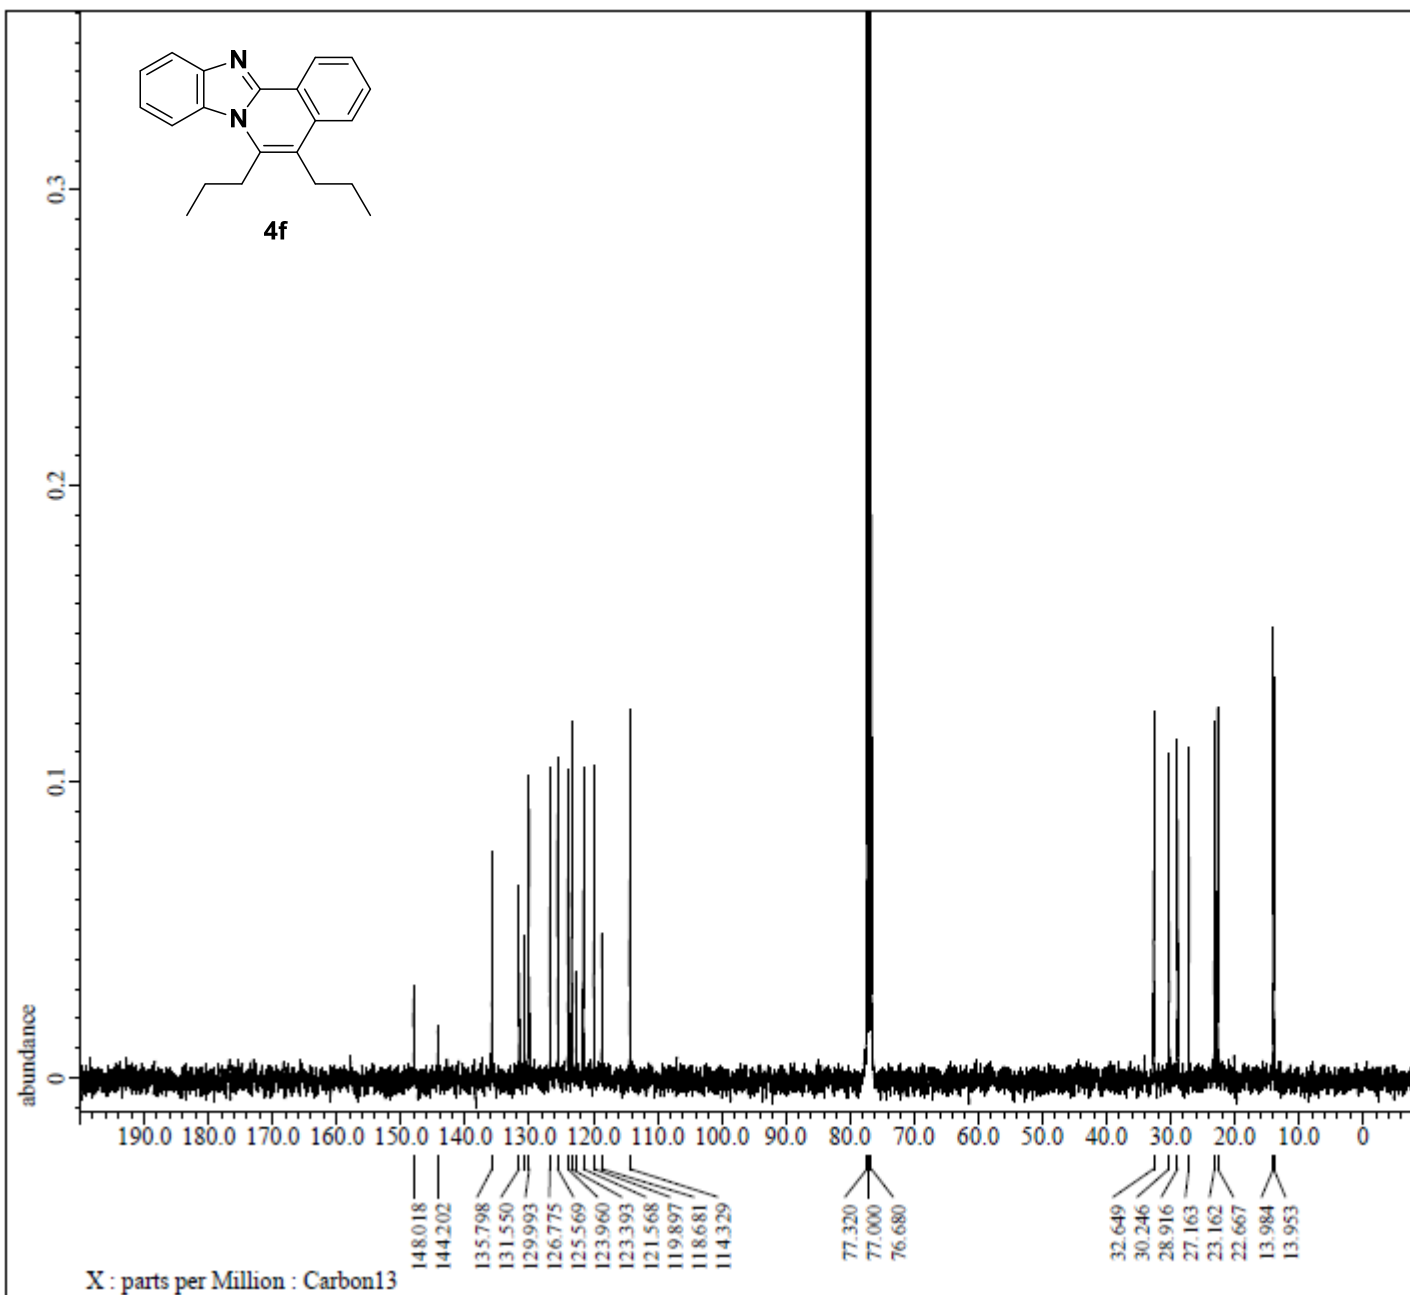

---- PROCESSING PARAMETERS ----  
 dc balance( 0, FALSE )  
 secp( 2.0[Hz], 0.0[s] )  
 trapezoid( 0[%], 0[%], 80[%], 100[%] )  
 zerofill( 1 )  
 fft( 1, TRUE, TRUE )  
 machinephase  
 ppm

Filename = AS\_311\_column\_f26-28\_Carbo  
 Author = delta  
 Experiment = carbon.jxp  
 Sample\_Id = AS\_311\_column\_f26-28  
 Solvent = CHLOROFORM-D  
 Creation\_Time = 25-FEB-2018 04:06:06  
 Revision\_Time = 25-MAY-2018 22:39:18  
 Current\_Time = 25-OCT-2018 09:04:45

Comment = AS\_311\_column\_f26-28  
 Data\_Format = 1D\_COMPLEX  
 Dim\_Size = 26214  
 Dim\_Title = Carbon13  
 Dim\_Units = [ppm]  
 Dimensions = X  
 Site = JNM-EC8400  
 Spectrometer = DELTA2\_NMR

Field\_Strength = 9.389766[T] (400[MHz])  
 X\_Acq\_Duration = 0.96468992[s]  
 X\_Domain = 13C  
 X\_Freq = 100.52530333[MHz]  
 X\_Offset = 100[ppm]  
 X\_Points = 32768  
 X\_Prescans = 4  
 X\_Resolution = 1.03660252[Hz]  
 X\_Sweep = 33.9673913[kHz]  
 X\_Sweep\_Clipped = 27.17391304[kHz]  
 Irr\_Domain = Proton  
 Irr\_Freq = 399.78219838[MHz]  
 Irr\_Offset = 5[ppm]  
 Clipped = FALSE  
 Scans = 1024  
 Total\_Scans = 1024

Relaxation\_Delay = 2[s]  
 Recvr\_Gain = 60  
 Temp\_Get = 460.0[dc]  
 X\_90\_Width = 12.6[us]  
 X\_Acq\_Time = 0.96468992[s]  
 X\_Angle = 30[deg]  
 X\_Atn = 6[db]  
 X\_Pulse = 4.2[us]  
 Irr\_Atn\_Dec = 20.776[db]  
 Irr\_Atn\_Noise = 20.776[db]  
 Irr\_Noise = WALTZ  
 Irr\_Width = 0.115[ms]  
 Decoupling = TRUE

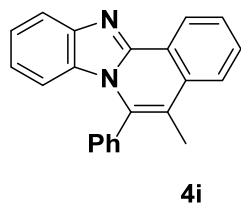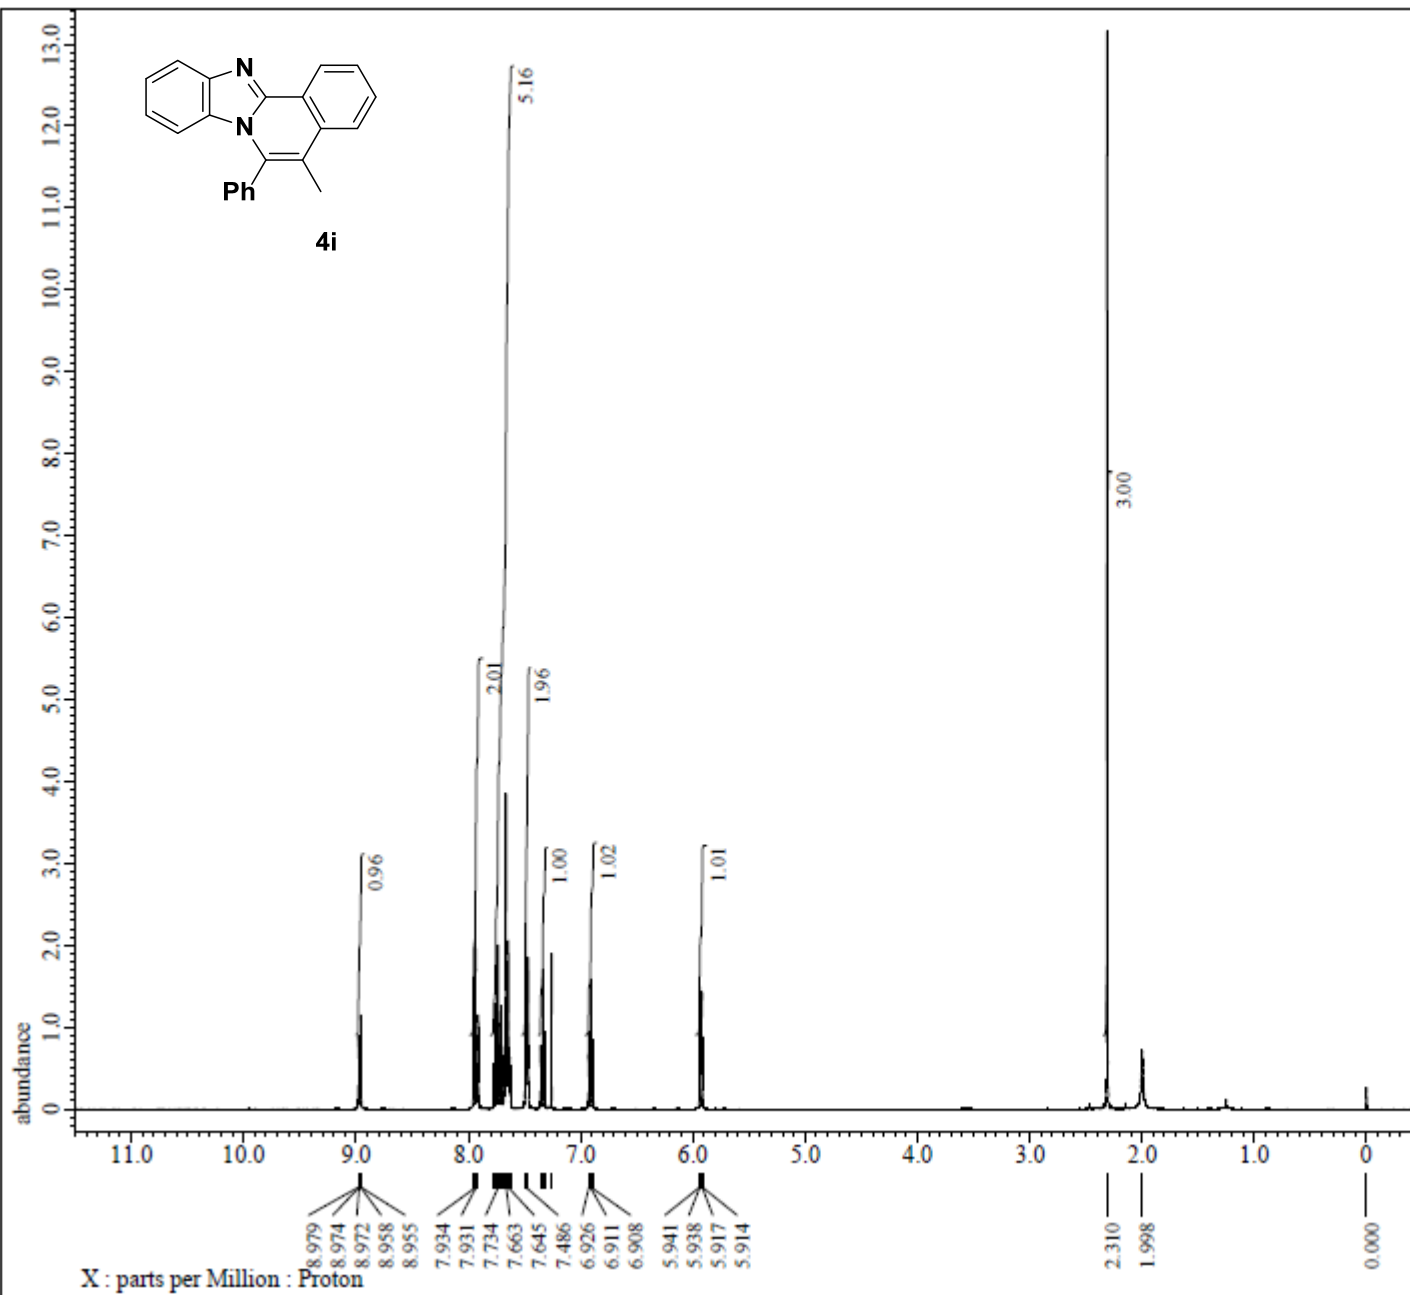

```

---- PROCESSING PARAMETERS ----
dc_balance( 0, FALSE )
sexp( 0.2[Hz], 0.0[s] )
trapezoid( 0[%], 0[%], 80[%], 100[%] )
zerofill( 1 )
fft( 1, TRUE, TRUE )
machinephase
ppm
  
```

```

Filename      = AS_365_rc_1_Proton-1-3.jdf
Author       = delta
Experiment   = proton.jxp
Sample_Id    = AS_365_rc_1
Solvent      = CHLOROFORM-D
Creation Time = 12-SEP-2018 23:54:36
Revision Time = 25-OCT-2018 09:21:35
Current_Time = 25-OCT-2018 09:21:59
  
```

```

Comment      = AS_365_rc_1
Data Format   = 1D_COMPLEX
Dim_Size     = 13107
Dim_Title    = Proton
Dim_Units    = [ppm]
Dimensions   = X
Site         = JNM-ECS400
Spectrometer = DELTA2_NMR
  
```

```

Field Strength = 9.389766[T] (400[MHz])
X_Acq_Duration = 2.18103808[s]
X_Domain       = 1H
X_Freq         = 399.78219838[MHz]
X_Offset       = 5[ppm]
X_Points       = 16384
X_Prescans     = 1
X_Resolution   = 0.45849727[Hz]
X_Sweep        = 7.51201923[kHz]
X_Sweep_Clippped = 6.00961538[kHz]
Irr_Domain     = Proton
Irr_Freq       = 399.78219838[MHz]
Irr_Offset     = 5[ppm]
Tri_Domain     = Proton
Tri_Freq       = 399.78219838[MHz]
Tri_Offset     = 5[ppm]
Clipped        = FALSE
Scans          = 8
Total_Scans    = 8
  
```

```

Relaxation_Delay = 5[s]
Recvr_Gain       = 38
Temp_Get         = 19.8[dc]
X_90_Width       = 11.5[us]
X_Acq_Time       = 2.18103808[s]
X_Angle          = 45[deg]
X_Atn            = 1.5[dB]
X_Pulse          = 5.75[us]
Irr_Mode         = Off
Tri_Mode         = Off
  
```

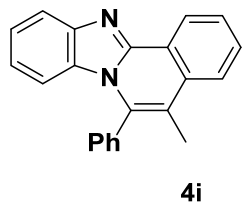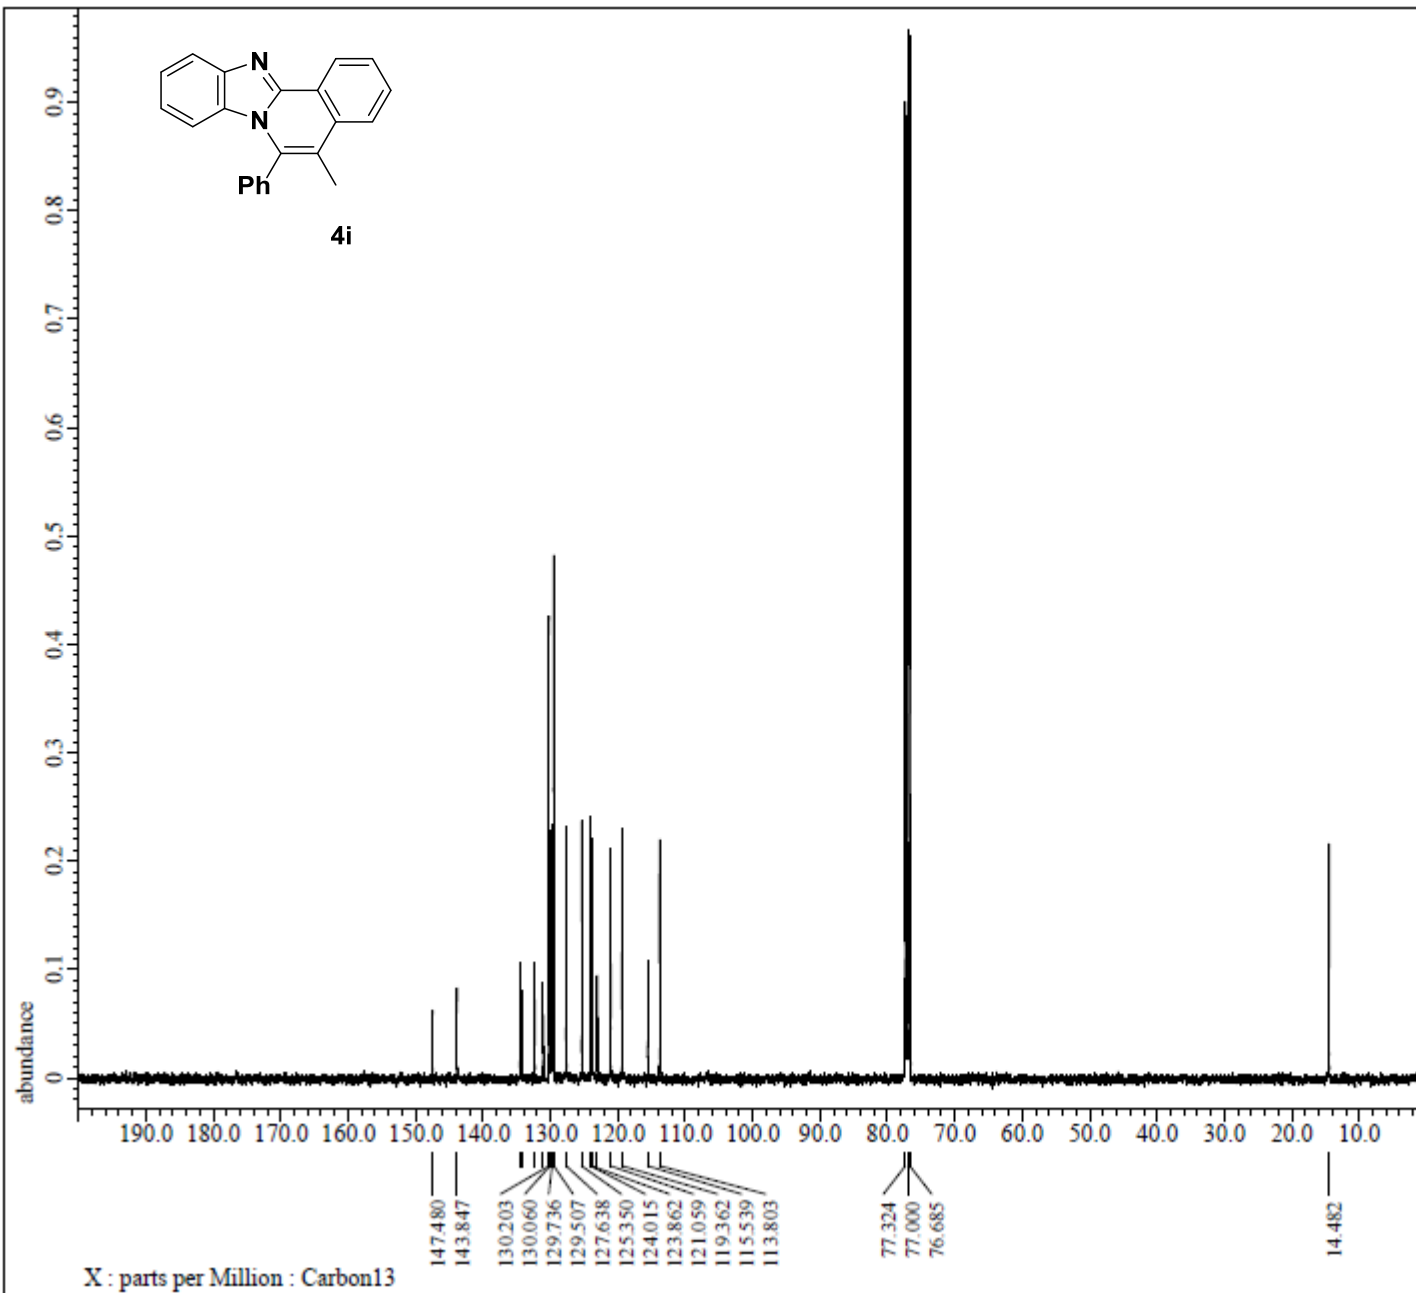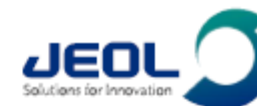

```

---- PROCESSING PARAMETERS ----
dc balance( 0, FALSE )
sexp( 2.0[Hz], 0.0[s] )
trapezoid( 0[%], 0[%], 80[%], 100[%] )
zerofill( 1 )
fft( 1, TRUE, TRUE )
machinephase
ppm

```

```

Filename      = AS 365 rc 1_Carbon-1-2.jdf
Author       = delta
Experiment   = carbon.jxp
Sample Id    = AS 365 rc 1
Solvent      = CHLOROFORM-D
Creation Time = 13-SEP-2018 03:06:41
Revision Time = 13-SEP-2018 15:00:19
Current Time  = 25-OCT-2018 09:22:40

```

```

Comment      = AS 365 rc 1
Data Format   = 1D COMPLEX
Dim Size     = 26214
Dim Title    = Carbon13
Dim Units    = [ppm]
Dimensions   = X
Site         = JNM-ECS400
Spectrometer = DELTA2_NMR

```

```

Field Strength = 9.389766[T] (400[MHz])
X_Acq_Duration = 1.04333312[s]
X_Domain       = 13C
X_Freq         = 100.52530333[MHz]
X_Offset       = 100[ppm]
X_Points       = 32768
X_Prescans     = 4
X_Resolution   = 0.95846665[Hz]
X_Sweep        = 31.40703518[kHz]
X_Sweep_Clippped = 25.12562814[kHz]
Irr_Domain     = Proton
Irr_Freq       = 399.78219838[MHz]
Irr_Offset     = 5[ppm]
Clipped        = FALSE
Scans          = 1024
Total_Scans    = 1024

```

```

Relaxation_Delay = 2[s]
Recvr Gain       = 60
Temp_Get         = 19.7[dc]
X_90_Width       = 10.5[us]
X_Acq_Time       = 1.04333312[s]
X_Angle          = 30[deg]
X_Atn            = 6[dB]
X_Pulse          = 3.5[us]
Irr_Atn_Dec      = 21.5[dB]
Irr_Atn_No     = 21.5[dB]
Irr_Noise        = WALTZ
Irr_Pwidth       = 0.115[ms]
Decoupling       = TRUE

```

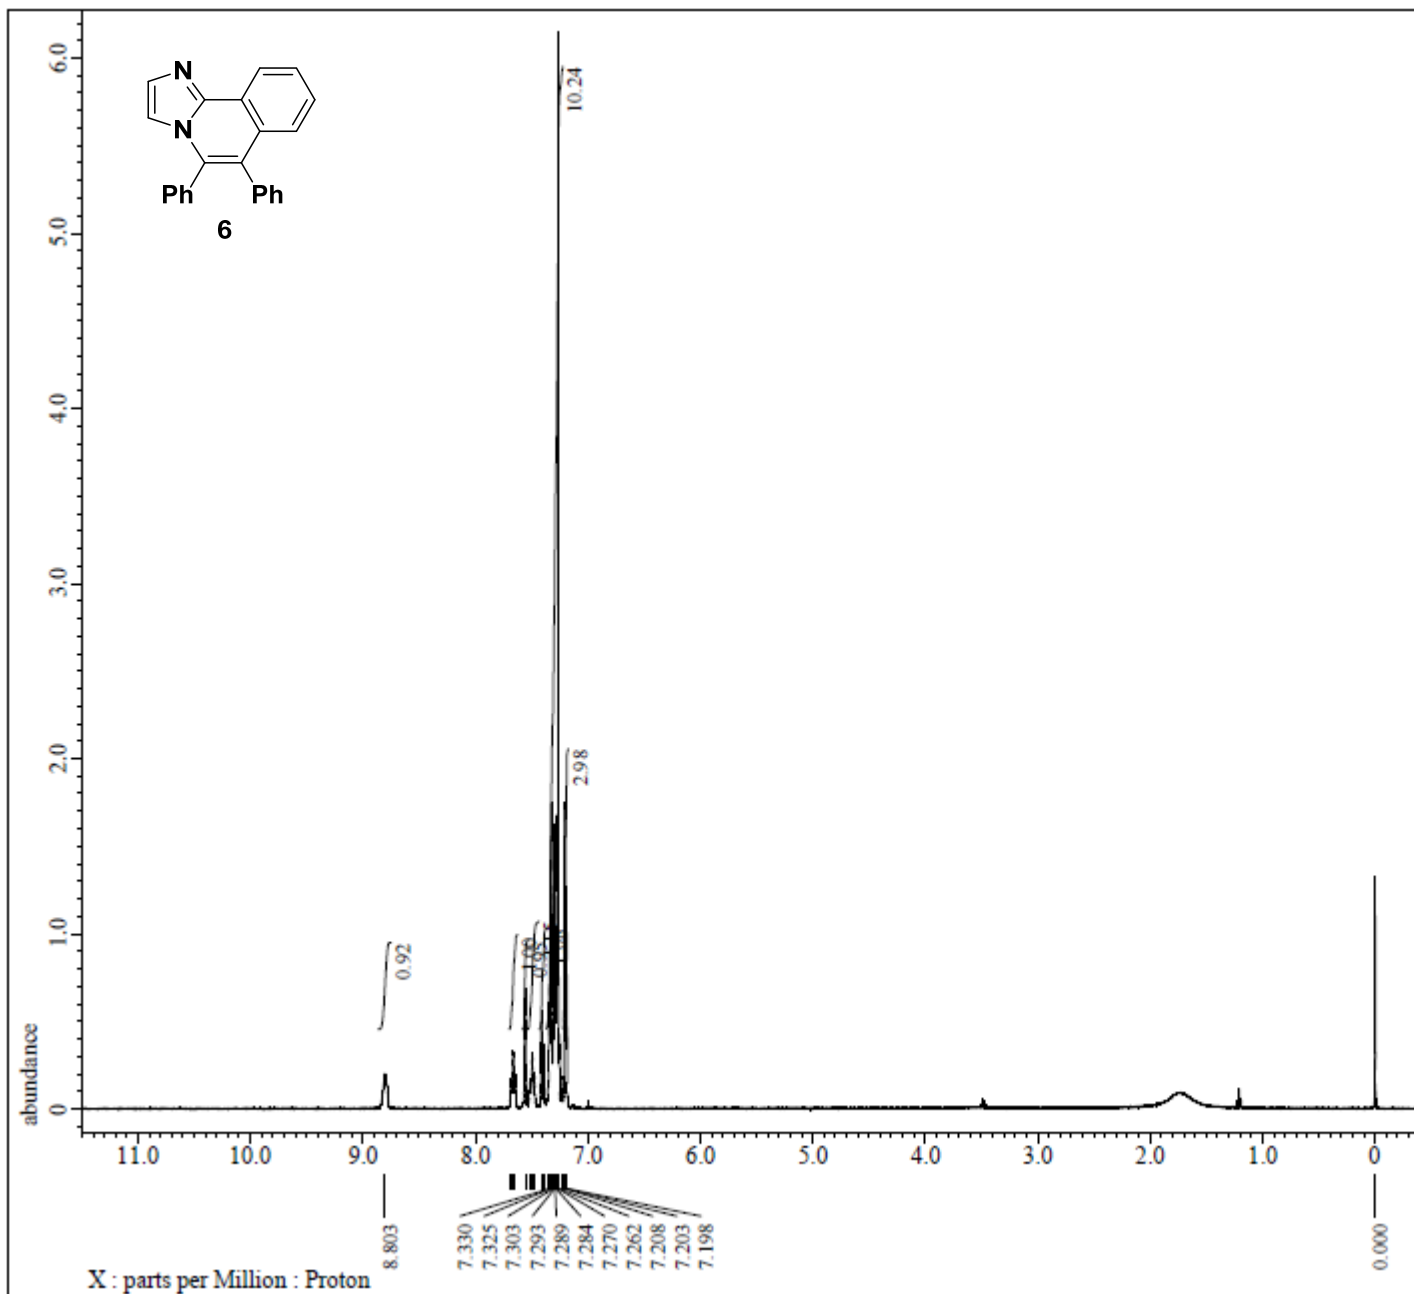

---- PROCESSING PARAMETERS ----  
 dc\_balance( 0, FALSE )  
 sexp( 0.2[Hz], 0.0[s] )  
 trapezoid( 0[%, 0[%, 80[%, 100[%) )  
 zerofill( 1 )  
 fft( 1, TRUE, TRUE )  
 machinephase  
 ppm

Filename = AS\_374\_rc\_Proton-1-2.jdf  
 Author = delta  
 Experiment = proton.jxp  
 Sample Id = AS\_374\_rc  
 Solvent = CHLOROFORM-D  
 Creation\_Time = 12-SEP-2018 23:32:06  
 Revision\_Time = 12-SEP-2018 23:35:54  
 Current\_Time = 25-OCT-2018 09:24:09

Comment = AS\_374\_rc  
 Data Format = 1D\_COMPLEX  
 Dim\_Size = 13107  
 Dim\_Title = Proton  
 Dim\_Units = [ppm]  
 Dimensions = X  
 Site = JNM-EC8400  
 Spectrometer = DELTA2\_NMR  
 Field Strength = 9.389766[T] (400[MHz])  
 X\_Acq\_Duration = 2.18103808[s]  
 X\_Domain = 1H  
 X\_Freq = 399.78219838[MHz]  
 X\_Offset = 5[ppm]  
 X\_Points = 16384  
 X\_Prescans = 1  
 X\_Resolution = 0.45849727[Hz]  
 X\_Sweep = 7.51201923[kHz]  
 X\_Sweep\_Clippped = 6.00961538[kHz]  
 Irr\_Domain = Proton  
 Irr\_Freq = 399.78219838[MHz]  
 Irr\_Offset = 5[ppm]  
 Tri\_Domain = Proton  
 Tri\_Freq = 399.78219838[MHz]  
 Tri\_Offset = 5[ppm]  
 Clipped = FALSE  
 Scans = 8  
 Total\_Scans = 8

Relaxation\_Delay = 5[s]  
 Recvr\_Gain = 50  
 Temp\_Get = 19.8[dc]  
 X\_90\_Width = 11.5[us]  
 X\_Acq\_Time = 2.18103808[s]  
 X\_Angle = 45[deg]  
 X\_Atn = 1.5[db]  
 X\_Pulse = 5.75[us]  
 Irr\_Mode = Off  
 Tri\_Mode = Off



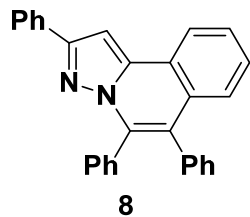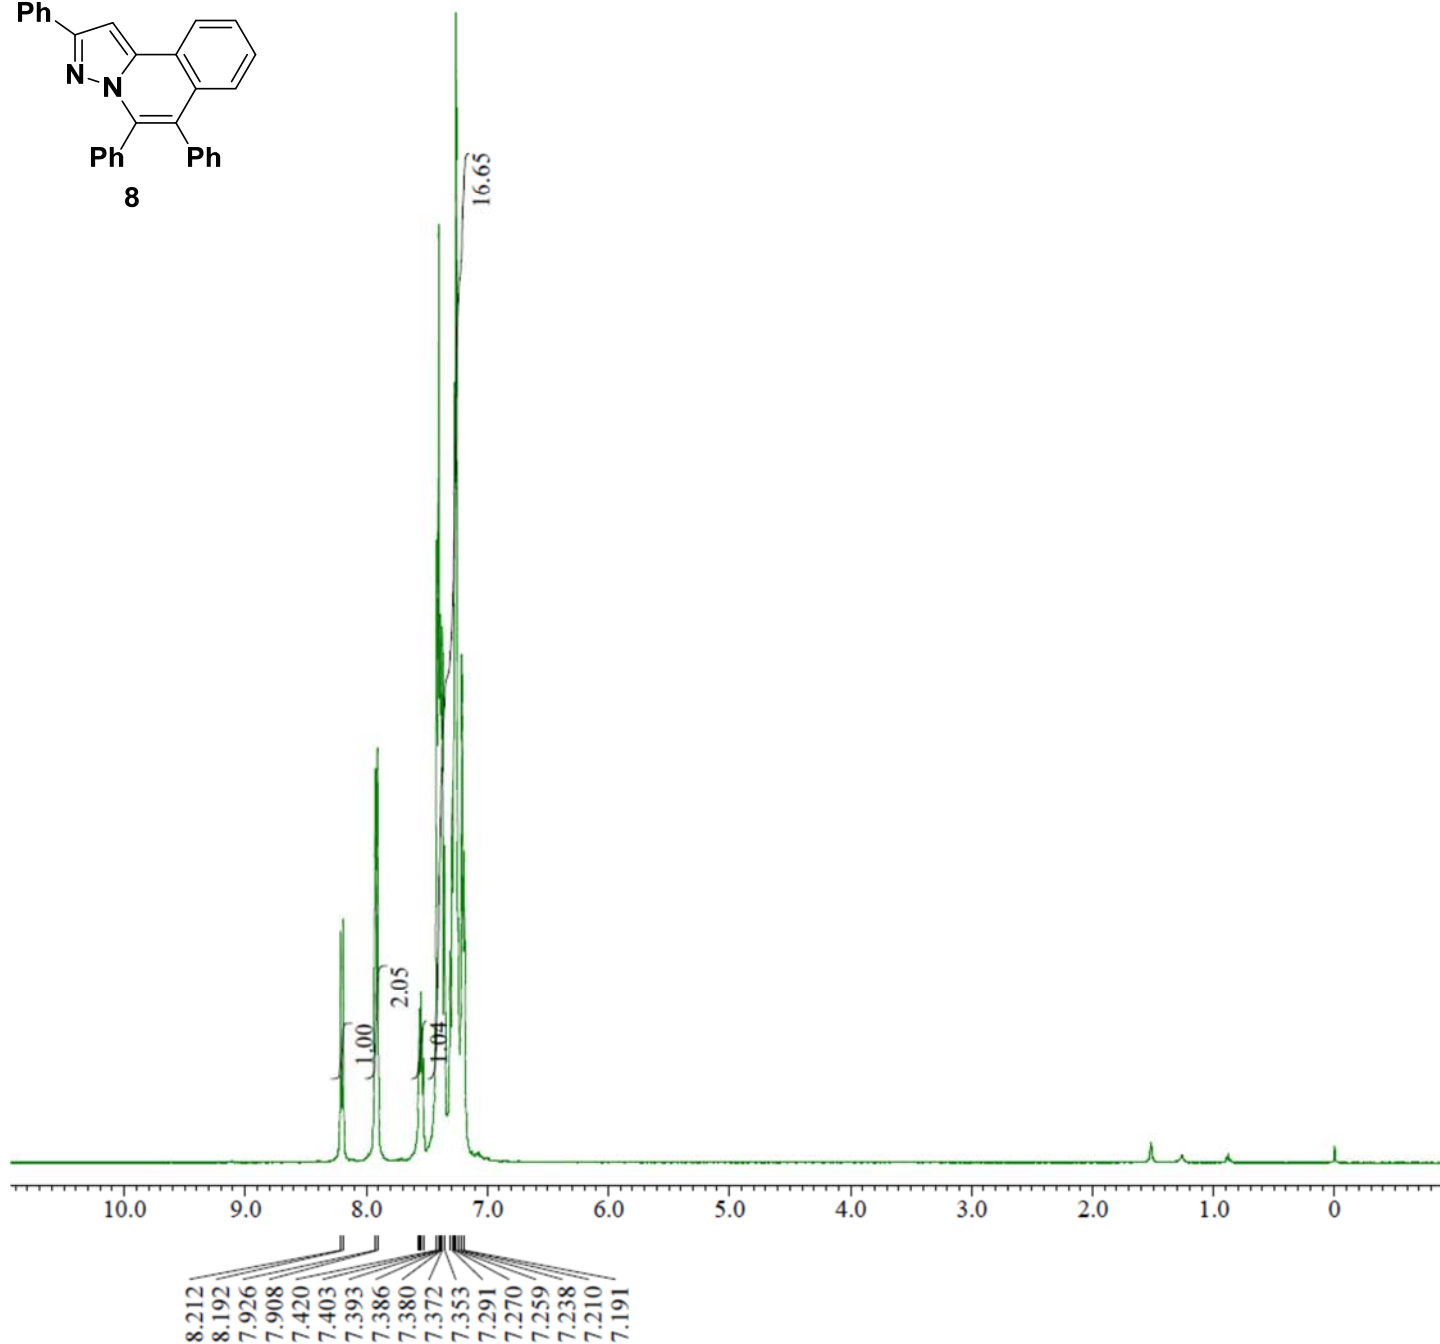

τ : parts per Million : Proton

```

Filename      = AO-1042 GPC_Proton-1-1.jdf
Author        = delta
Experiment     = proton.jxp
Sample Id     = AO-1042 GPC
Solvent       = CHLOROFORM-D
Creation Time  = 26-FEB-2018 21:13:16
Revision Time = 6-MAR-2018 12:40:13
Current Time  = 16-MAR-2018 19:12:08

Comment       = AO-1042 GPC
Data Format    = 1D COMPLEX
Dim Size      = 13107
Dim Title     = Proton
Dim Units     = [ppm]
Dimensions    = X
Site          = JNM-ECS400
Spectrometer  = DELTA2_NMR

Field Strength = 9.389766[T] (400[MHz])
X_Acq_Duration = 2.18103808[s]
X_Domain      = 1H
X_Freq        = 399.78219838[MHz]
X_Offset      = 5[ppm]
X_Points      = 16384
X_Prescans    = 1
X_Resolution  = 0.45849727[Hz]
X_Sweep       = 7.51201923[kHz]
X_Sweep_Clip  = 6.00961538[kHz]
Irr_Domain    = Proton
Irr_Freq      = 399.78219838[MHz]
Irr_Offset    = 5[ppm]
Tri_Domain    = Proton
Tri_Freq      = 399.78219838[MHz]
Tri_Offset    = 5[ppm]
Clipped       = FALSE
Scans         = 8
Total_Scans   = 8

Relaxation_Delay = 5[s]
Recvr Gain       = 28
Temp_Get        = 460.0[dC]
X_90_Width      = 11.1[us]
X_Acq_Time      = 2.18103808[s]
X_Angle         = 45[deg]
X_Atn           = 1[dB]
X_Pulse         = 5.55[us]
Irr_Mode        = Off
Tri_Mode        = Off
Dante_Presat    = FALSE
Initial_Wait    = 1[s]
Repetition_Time = 7.18103808[s]
  
```



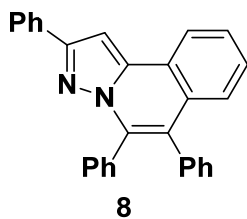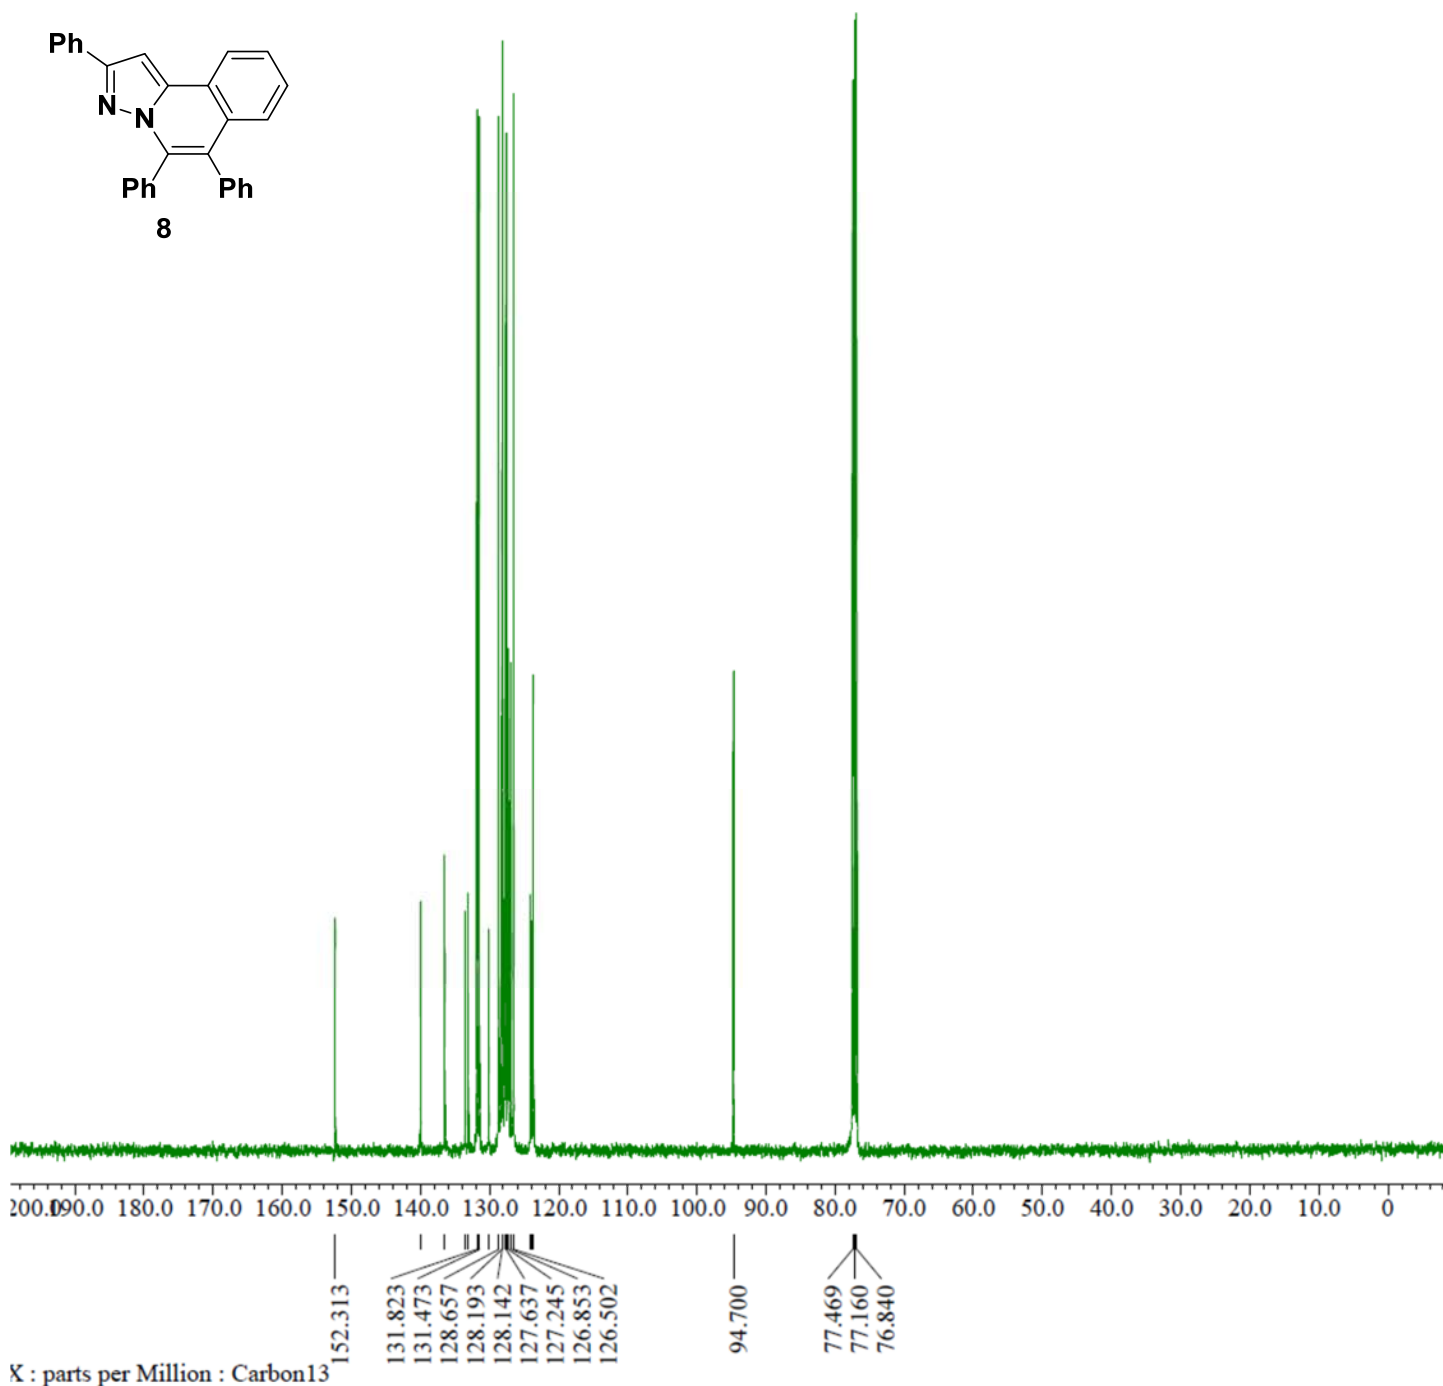

```

Filename      = AO-1042 GPC_Carbon-1-1.jdf
Author       = delta
Experiment   = carbon.jxp
Sample Id    = AO-1042 GPC
Solvent      = CHLOROFORM-D
Creation Time = 27-FEB-2018 01:04:29
Revision Time = 27-FEB-2018 13:02:06
Current Time  = 16-MAR-2018 19:11:47

Comment      = AO-1042 GPC
Data Format   = 1D COMPLEX
Dim Size     = 26214
Dim Title    = Carbon13
Dim Units    = [ppm]
Dimensions   = X
Site         = JNM-ECS400
Spectrometer = DELTA2_NMR

Field Strength = 9.389766[T] (400[MHz])
X Acq Duration = 0.96468992[s]
X Domain      = 13C
X Freq        = 100.52530333[MHz]
X Offset      = 100[ppm]
X Points      = 32768
X Prescans    = 4
X Resolution  = 1.03660252[Hz]
X Sweep       = 33.9673913[kHz]
X Sweep Clipped = 27.17391304[kHz]
Irr Domain    = Proton
Irr Freq      = 399.78219838[MHz]
Irr Offset    = 5[ppm]
Clipped       = FALSE
Scans         = 1024
Total Scans   = 1024

Relaxation_Delay = 2[s]
Recvr Gain       = 60
Temp Get         = 460.0[dC]
X 90 Width      = 12.6[us]
X Acq Time      = 0.96468992[s]
X Angle         = 30[deg]
X Atn           = 6[dB]
X Pulse         = 4.2[us]
Irr Atn Dec     = 20.776[dB]
Irr Atn Noe     = 20.776[dB]
Irr Noise       = WALTZ
Irr Pwidth      = 0.115[ms]
Decoupling      = TRUE
Initial Wait    = 1[s]
Noe              = TRUE
Noe Time        = 2[s]
Repetition Time = 2.96468992[s]

```

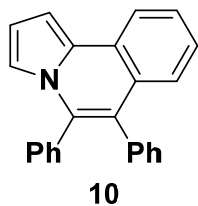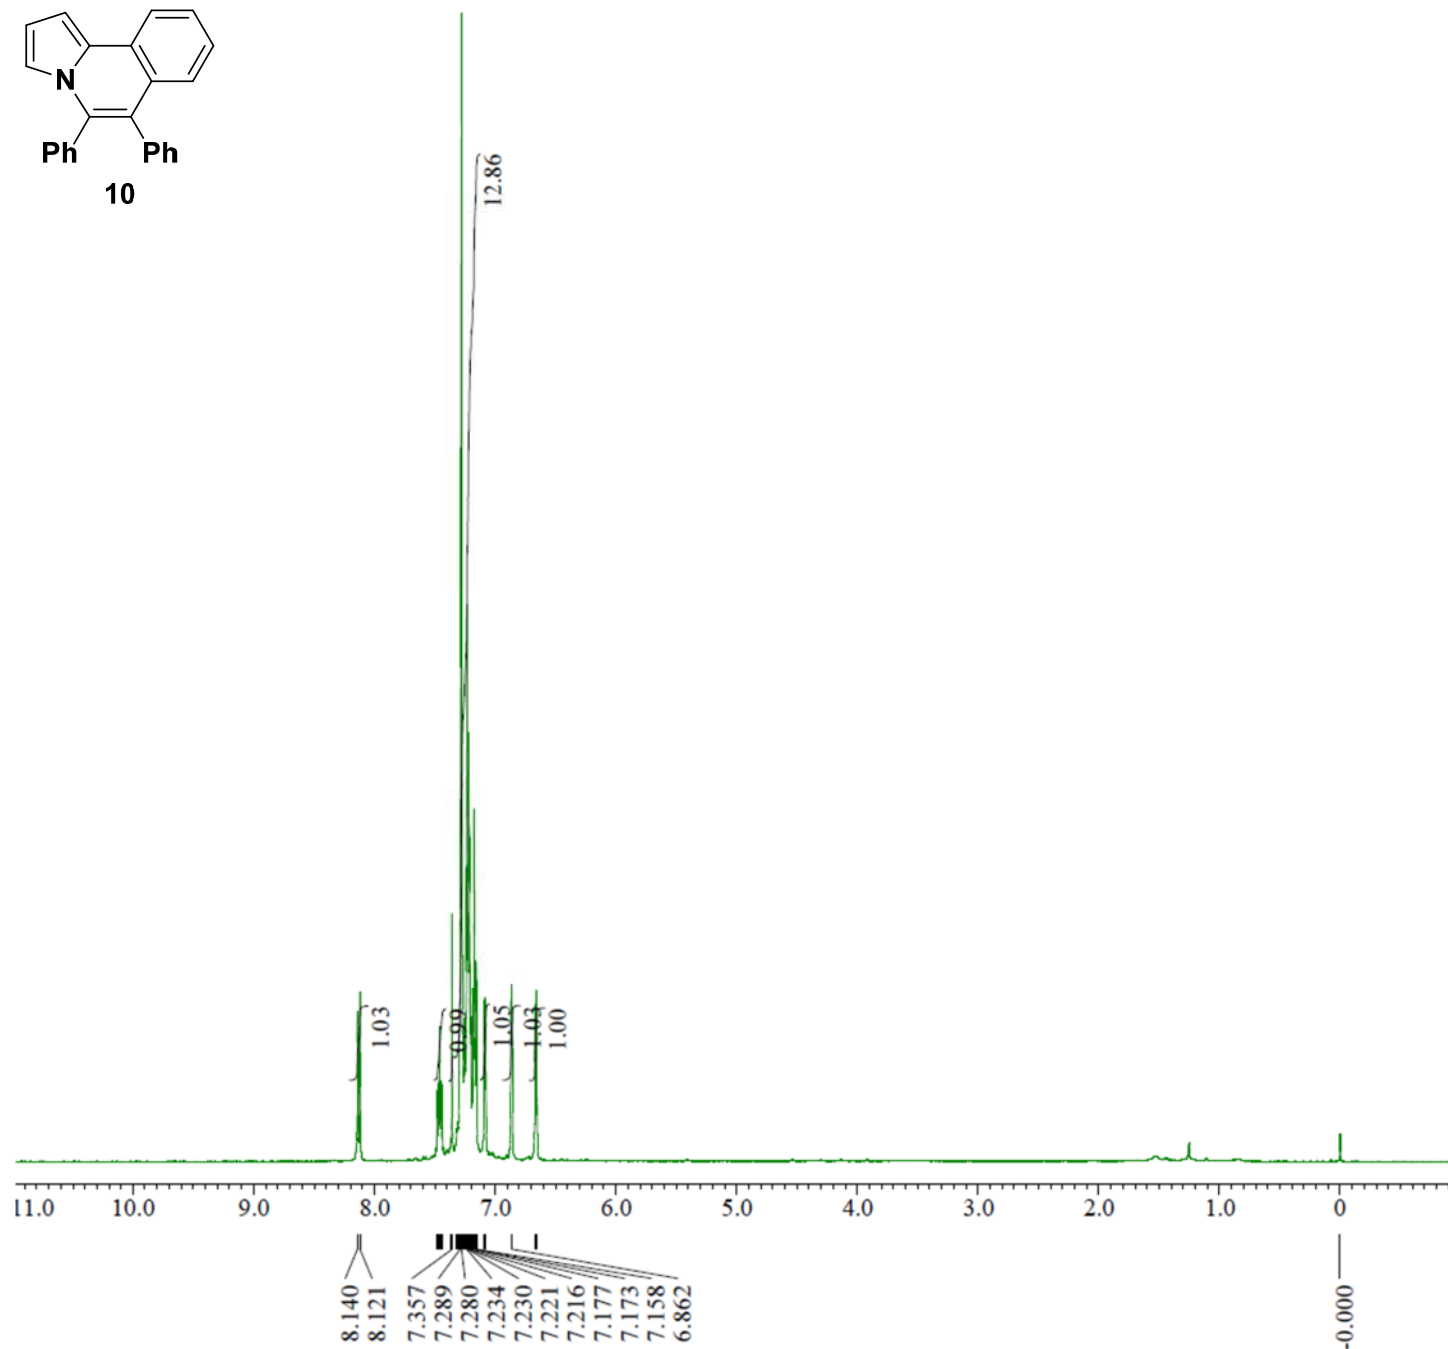

X : parts per Million : Proton

```

Filename      = AO-1011 GPC_Proton-1-1.jdf
Author       = delta
Experiment   = proton.jxp
Sample Id    = AO-1011 GPC
Solvent      = CHLOROFORM-D
Creation Time = 26-FEB-2018 21:07:15
Revision Time = 6-MAR-2018 12:39:01
Current Time  = 16-MAR-2018 19:08:55

Comment      = AO-1011 GPC
Data Format   = 1D COMPLEX
Dim Size     = 13107
Dim Title    = Proton
Dim Units    = [ppm]
Dimensions   = X
Site         = JNM-ECS400
Spectrometer = DELTA2_NMR

Field Strength = 9.389766[T] (400[MHz])
X_Acq_Duration = 2.18103808[s]
X_Domain      = 1H
X_Freq        = 399.78219838[MHz]
X_Offset      = 5[ppm]
X_Points      = 16384
X_Prescans    = 1
X_Resolution  = 0.45849727[Hz]
X_Sweep       = 7.51201923[kHz]
X_Sweep_Clip  = 6.00961538[kHz]
Irr_Domain    = Proton
Irr_Freq      = 399.78219838[MHz]
Irr_Offset    = 5[ppm]
Tri_Domain    = Proton
Tri_Freq      = 399.78219838[MHz]
Tri_Offset    = 5[ppm]
Clipped       = FALSE
Scans         = 8
Total_Scans   = 8

Relaxation_Delay = 5[s]
Recvr Gain       = 30
Temp_Get         = 460.0[dC]
X_90_Width      = 11.1[us]
X_Acq_Time       = 2.18103808[s]
X_Angle         = 45[deg]
X_Atn           = 1[dB]
X_Pulse         = 5.55[us]
Irr_Mode        = Off
Tri_Mode        = Off
Dante_Presat    = FALSE
Initial_Wait    = 1[s]
Repetition_Time = 7.18103808[s]

```

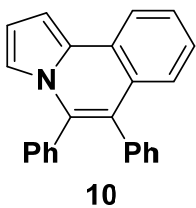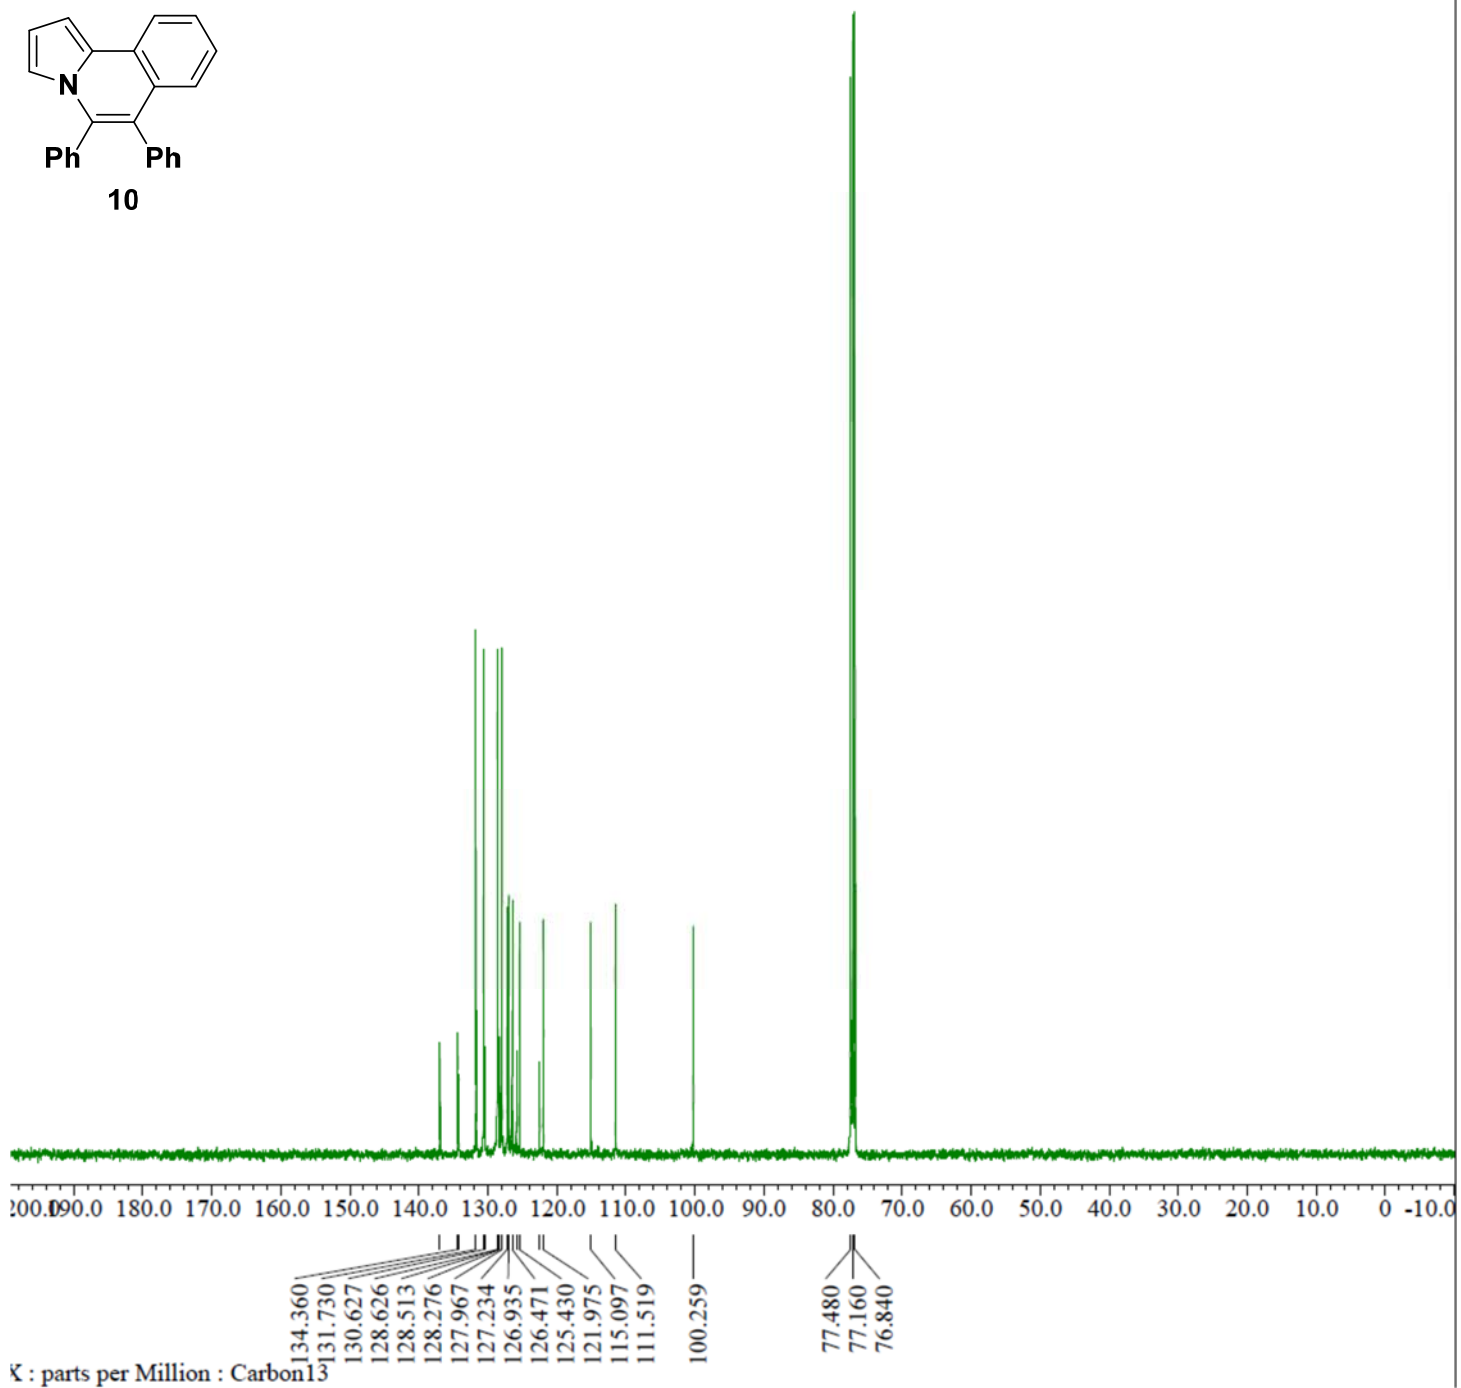

```

Filename      = AO-1011 GPC_Carbon-1-3.jdf
Author       = delta
Experiment   = carbon.jxp
Sample Id    = AO-1011 GPC
Solvent      = CHLOROFORM-D
Creation Time = 27-FEB-2018 00:04:55
Revision Time = 12-MAR-2018 14:18:32
Current_Time = 16-MAR-2018 19:11:23

Comment      = AO-1011 GPC
Data Format   = 1D COMPLEX
Dim_Size     = 26214
Dim_Title    = Carbon13
Dim_Units    = [ppm]
Dimensions   = X
Site         = JNM-ECS400
Spectrometer = DELTA2_NMR

Field_Strength = 9.389766[T] (400[MHz])
X_Acq_Duration = 0.96468992[s]
X_Domain       = 13C
X_Freq         = 100.52530333[MHz]
X_Offset       = 100[ppm]
X_Points       = 32768
X_Prescans     = 4
X_Resolution   = 1.03660252[Hz]
X_Sweep        = 33.9673913[kHz]
X_Sweep_Clippped = 27.17391304[kHz]
Irr_Domain     = Proton
Irr_Freq       = 399.78219838[MHz]
Irr_Offset     = 5[ppm]
Clipped        = FALSE
Scans          = 1024
Total_Scans    = 1024

Relaxation_Delay = 2[s]
Recvr Gain       = 60
Temp_Get         = 460.0[dC]
X_90_Width      = 12.6[us]
X_Acq_Time       = 0.96468992[s]
X_Angle         = 30[deg]
X_Atn           = 6[dB]
X_Pulse         = 4.2[us]
Irr_Atn_Dec     = 20.776[dB]
Irr_Atn_Noise   = 20.776[dB]
Irr_Noise       = WALTZ
Irr_Pwidth      = 0.115[ms]
Decoupling      = TRUE
Initial_Wait    = 1[s]
Noe              = TRUE
Noe Time        = 2[s]
Repetition_Time = 2.96468992[s]

```

X : parts per Million : Carbon13

## ORTEP of 4i

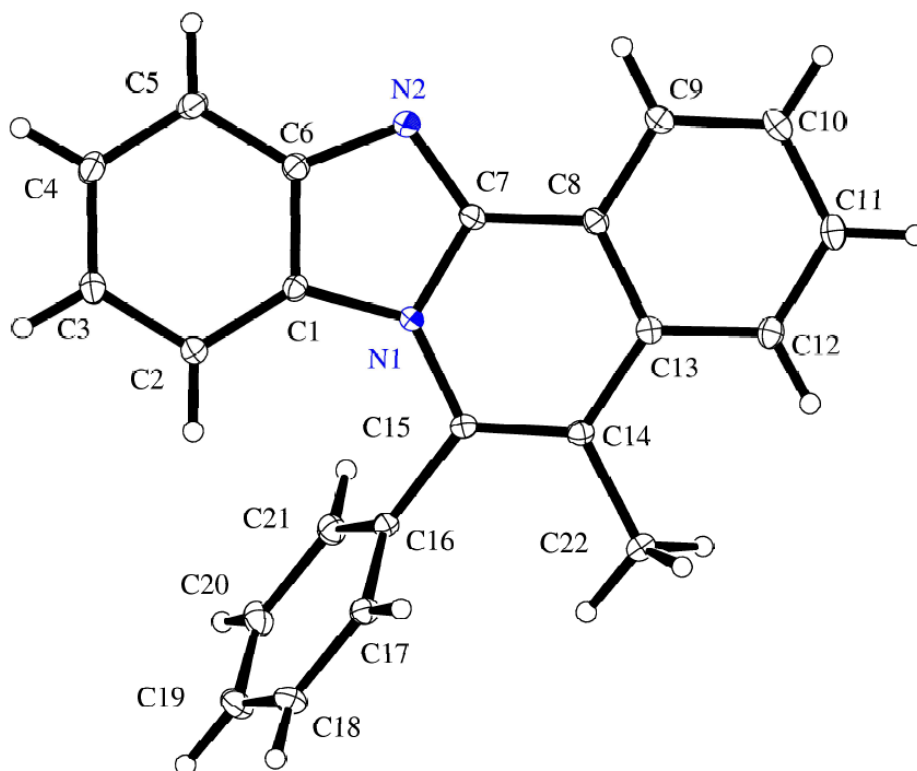

## 6. Gibbs Free Energy Profile of the Initial Path

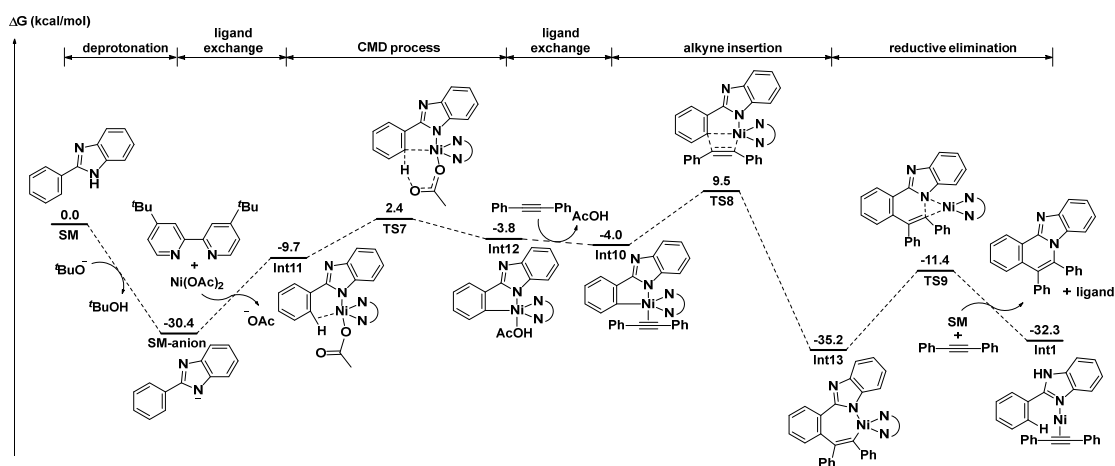

**Scheme S1** Gibbs free energy profile of the initial path calculated at the B3PW91/6-311+G(2d,p)-SDD(Ni)/PCM//B3LYP/6-31+G(d)-LanI2dz(Ni) level of theory. Gibbs free energies are given based on SM.

The energy profile of the initial path is shown in Scheme S1. Deprotonation of the amide **SM** by a *tert*-butoxide anion proceeds with a dramatic energy drop to give the **SM-anion**. After ligand exchange of the nickel catalyst by the **SM-anion**, the acetate ligand promotes a concerted-metalation-deprotonation (CMD) process. Coordination of the *ortho* C-H bond would facilitate the formation of the nickelacycle **Int12**. Following acetic acid-alkyne exchange, an alkyne is inserted into the Ni-C bond, which proceeds through **TS8** with an activation energy of 13.5 kcal/mol. This step is highly exothermic due to the stability of the seven-membered metalacycle **Int13**. The free energy barrier associated with the final reductive elimination step through **TS9** is 23.8 kcal/mol. The Ni(0) species generated in the reductive elimination step from **Int13** participates in the main catalytic cycle after ligand exchange to give **Int1**.

## 7. Computational Details

Calculations were performed with the Gaussian 09 (G09) program.<sup>1</sup> Geometry optimizations and frequency calculations for all reported structures were performed using B3LYP with the 6-31+G(d) basis set for C, H, O, N and the Lanl2dz effective core potential (ECP) for Ni.<sup>2-4</sup> Single point energy calculations were performed using B3PW91 with the 6-311+G(2d,p) basis set for C, H, O, N and the SDD ECP for Ni.<sup>5-7</sup> PCM<sup>8-10</sup> solvent effects were incorporated for all calculations with toluene as the solvent. Each reported minimum has zero imaginary frequency and each transition state (TS) structure has only one imaginary frequency. From TSs, reaction paths were traced by the intrinsic reaction coordinate (IRC) method<sup>11,12</sup> to obtain the energy-minimum geometries. Energy changes were shown by the use of Gibbs free energies (T = 298.15 K and P = 1 atm).

## 8. Energies for Calculated Structures

Electronic energies, as well as zero point energy (ZPE), enthalpy (H), Gibbs free energy (G), and imaginary frequency (Im. Freq.) for all structures calculated at B3LYP/6-31+G(d)-Lanl2dz level of theory are provided. PCM solvent effects were incorporated for all calculations with toluene as the solvent.

**Table S1** Energies for the main catalytic cycle in Scheme 4 (in hartrees)

| structure  | E              | ZPE      | H        | G°       | Im. Freq. |
|------------|----------------|----------|----------|----------|-----------|
| Int1       | -1319.78416694 | 0.393029 | 0.419206 | 0.331712 | -         |
| TS1        | -1319.73903463 | 0.387709 | 0.413361 | 0.329652 | 355.56i   |
| Int2       | -1319.76955183 | 0.392925 | 0.418292 | 0.335016 | -         |
| PhCCPh     | -539.4839997   | 0.191624 | 0.203658 | 0.150820 | -         |
| Int3       | -1859.25666236 | 0.585769 | 0.623985 | 0.510726 | -         |
| TS2        | -1859.23906214 | 0.585791 | 0.622978 | 0.512065 | 201.94i   |
| Int4       | -1859.30363181 | 0.587933 | 0.625071 | 0.514791 | -         |
| TS3        | -1859.25466071 | 0.586704 | 0.623231 | 0.515122 | 283.44i   |
| Int5       | -1859.25918432 | 0.587932 | 0.624983 | 0.516133 | -         |
| SM         | -610.957845118 | 0.199299 | 0.211013 | 0.161744 | -         |
| product    | -1149.29395473 | 0.373014 | 0.395000 | 0.321484 | -         |
| cis-alkene | -540.724309507 | 0.215114 | 0.227151 | 0.176472 | -         |
| Int6       | -1319.75782531 | 0.392566 | 0.418765 | 0.331364 | -         |
| TS4        | -1319.72655622 | 0.386119 | 0.412222 | 0.326188 | 989.12i   |
| Int7       | -1319.74745542 | 0.387976 | 0.414341 | 0.327871 | -         |
| TS5        | -1319.73827565 | 0.387175 | 0.412750 | 0.329358 | 452.59i   |
| Int8       | -1319.76530499 | 0.391632 | 0.417377 | 0.332398 | -         |
| TS6        | -1319.72530152 | 0.387851 | 0.412922 | 0.330977 | 1316.21i  |
| Int9       | -1319.78847160 | 0.393917 | 0.418918 | 0.337973 | -         |
| Int10      | -2128.50832792 | 0.755585 | 0.801652 | 0.673988 | -         |

**Table S2** Energies for the initial path in Scheme S1 (in hartrees)

| structure            | E              | ZPE      | H        | G°       | Im. Freq. |
|----------------------|----------------|----------|----------|----------|-----------|
| 'BuO <sup>-</sup>    | -233.1362105   | 0.121180 | 0.128439 | 0.092531 | -         |
| 'BuOH                | -233.6864178   | 0.135623 | 0.143314 | 0.106597 | -         |
| SM-anion             | -610.452441027 | 0.185441 | 0.196838 | 0.148437 | -         |
| Ni(OAc) <sub>2</sub> | -626.3663171   | 0.103704 | 0.115232 | 0.065672 | -         |
| ligand               | -809.920035806 | 0.382981 | 0.403823 | 0.334045 | -         |
| OAc <sup>-</sup>     | -228.5986816   | 0.048238 | 0.052749 | 0.022342 | -         |
| Int11                | -1818.13908944 | 0.625061 | 0.665008 | 0.550052 | -         |
| TS7                  | -1818.11101568 | 0.620775 | 0.659683 | 0.549213 | 1372.72i  |
| Int12                | -1818.12646347 | 0.625876 | 0.665365 | 0.553345 | -         |
| AcOH                 | -229.0999814   | 0.061617 | 0.067160 | 0.034208 | -         |
| TS8                  | -2128.48254772 | 0.754242 | 0.799788 | 0.672527 | 274.17i   |
| Int13                | -2128.56492263 | 0.758002 | 0.803088 | 0.678794 | -         |
| TS9                  | -2128.52589970 | 0.756150 | 0.800680 | 0.678127 | 230.20i   |

## 9. B3LYP/6-31+G(d)-Lanl2dz-optimized structures of the model compounds

**Figure S1** B3LYP/6-31+G(d)-Lanl2dz-optimized structures of the model compounds of the red line in Scheme 4.

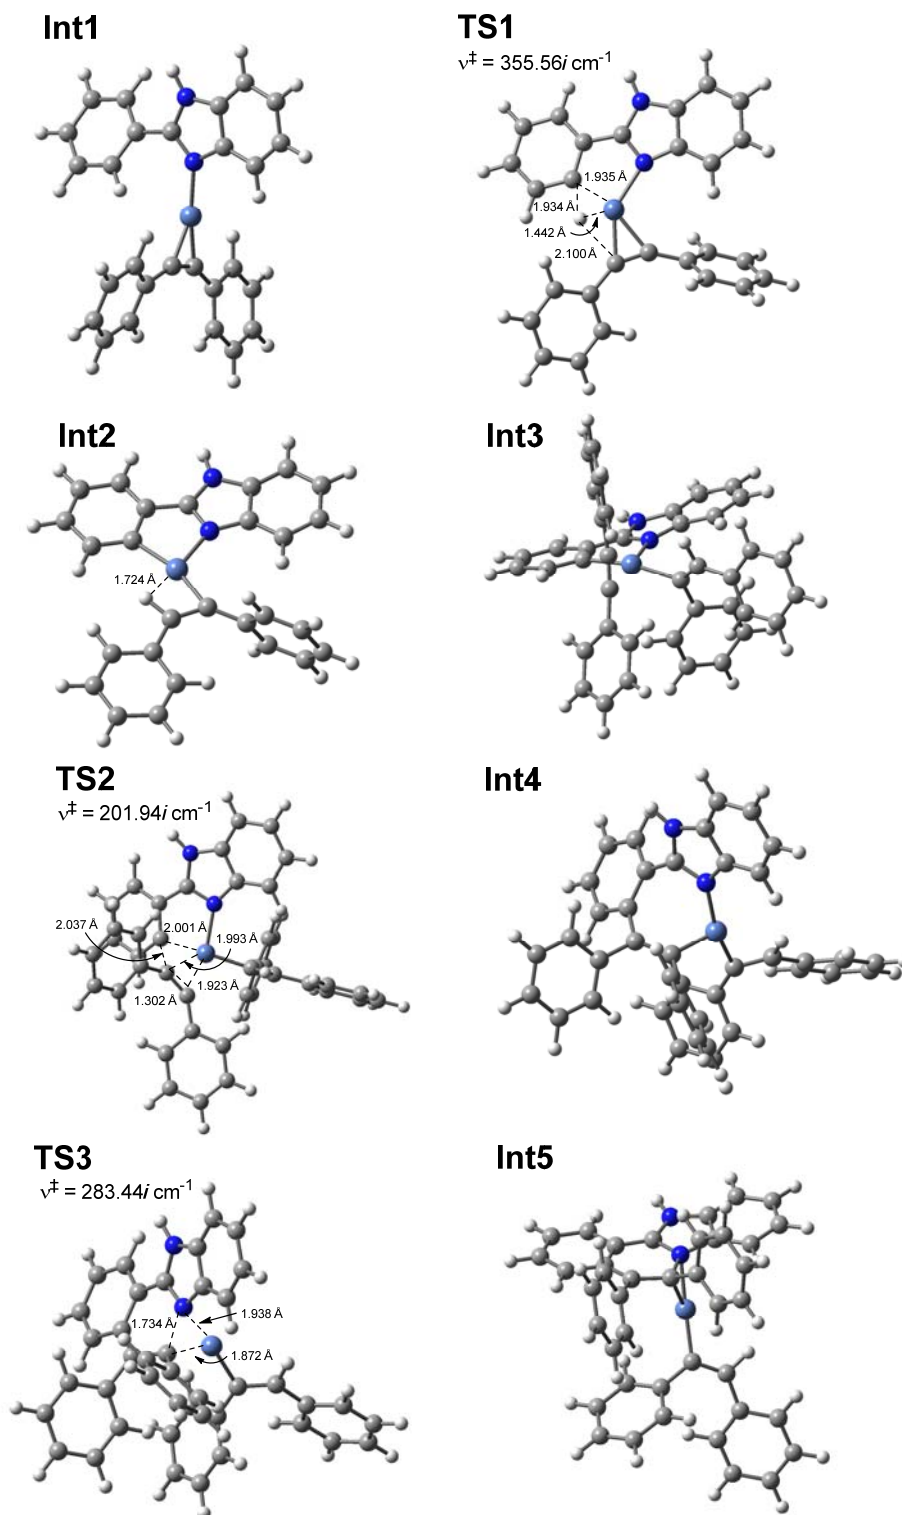

**SM**

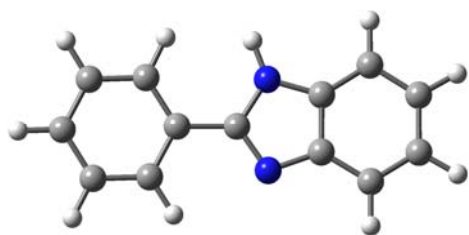

**product**

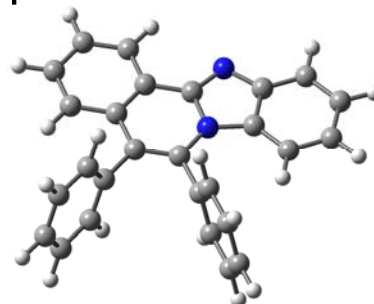

**PhCCPh**

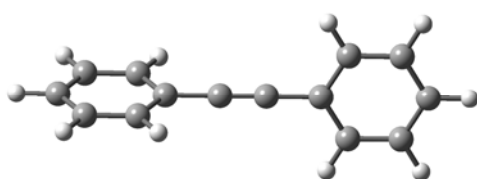

***cis*-alkene**

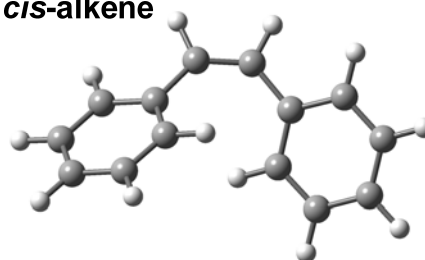



**Figure S2** B3LYP/6-31+G(d)-Lanl2dz-optimized structures of the model compounds of the blue line in Scheme 4.

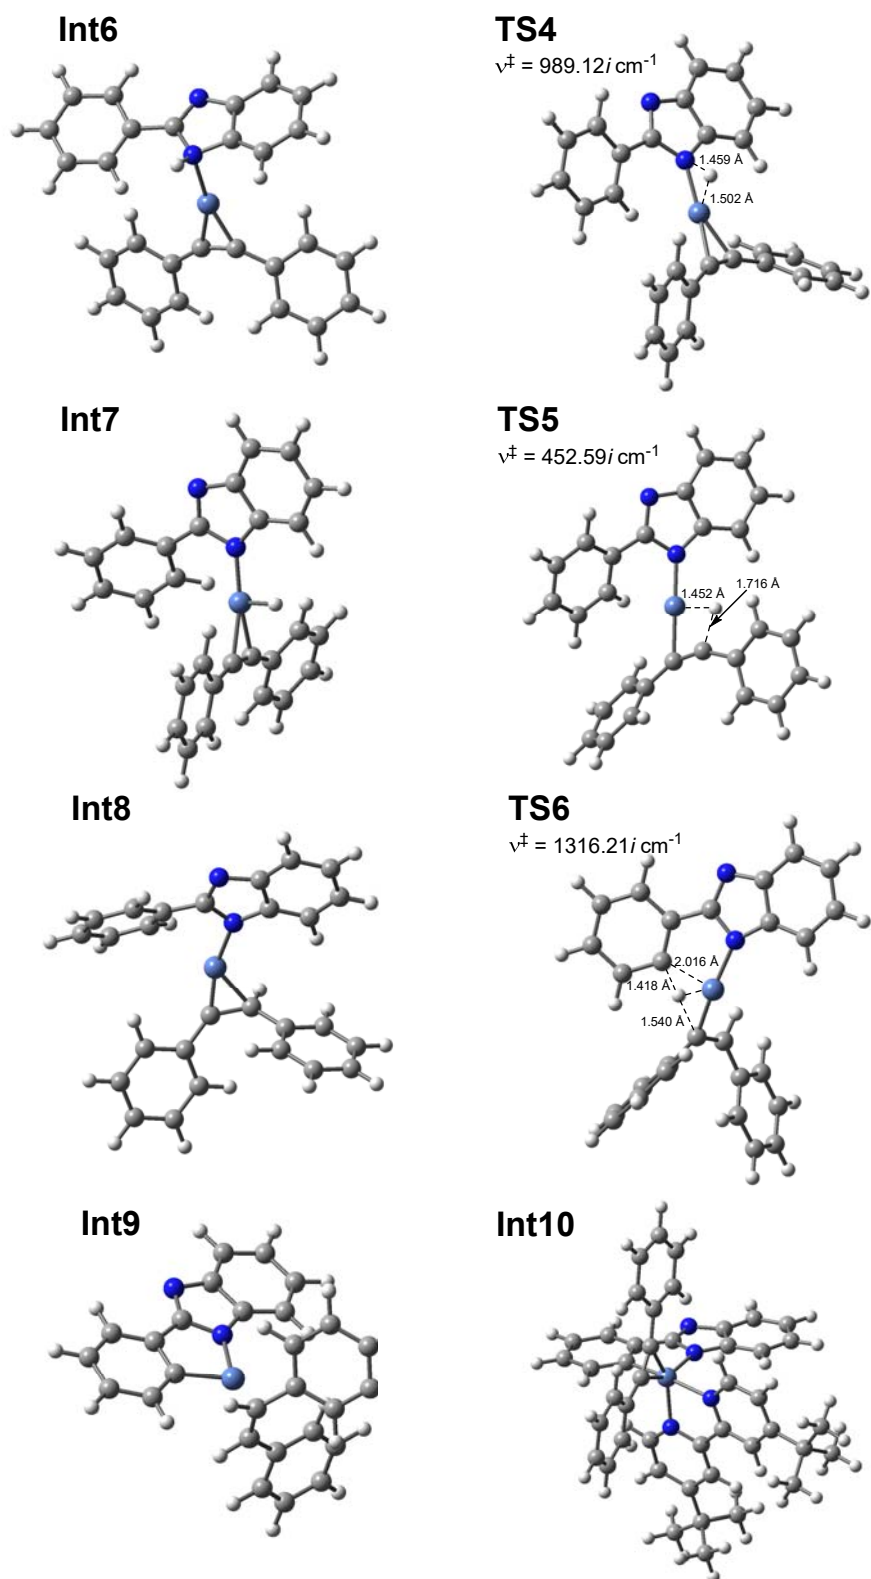

**Figure S3** B3LYP/6-31+G(d)-Lanl2dz-optimized structures of the model compounds in Scheme S1.

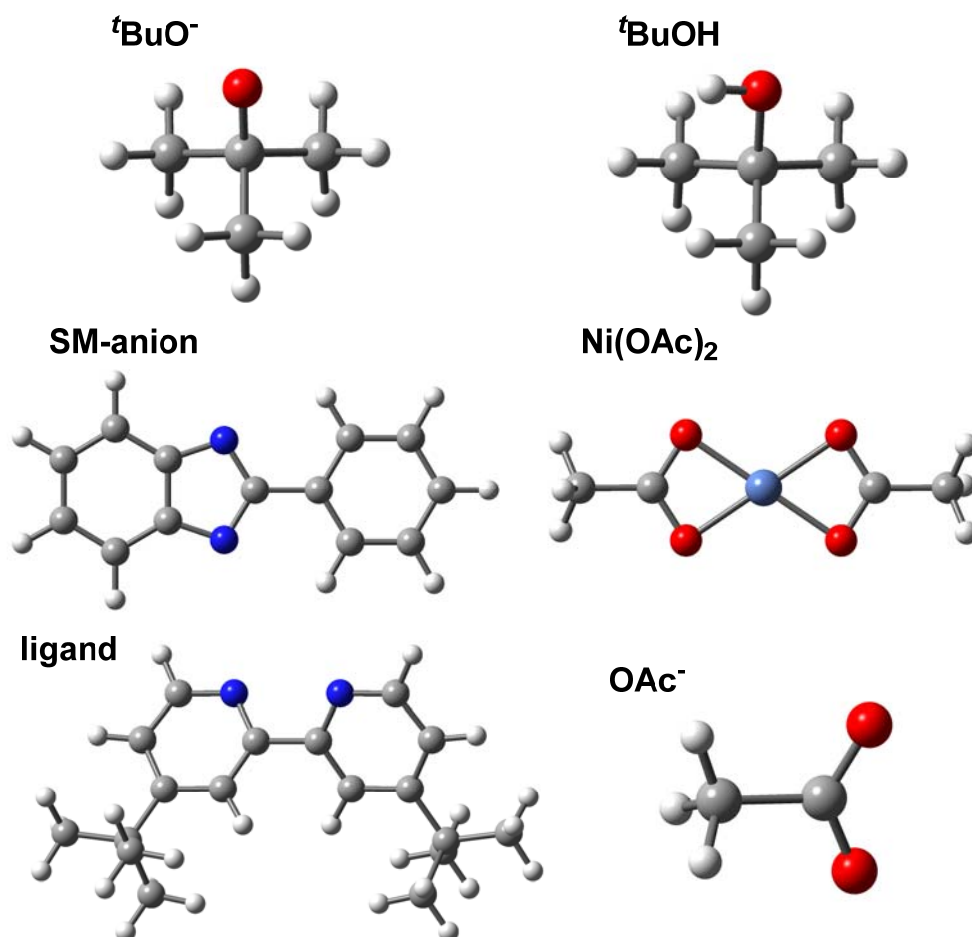

**Int11**

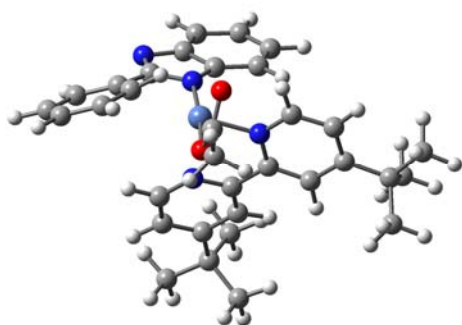

**TS7**

$v^\ddagger = 1372.72i \text{ cm}^{-1}$

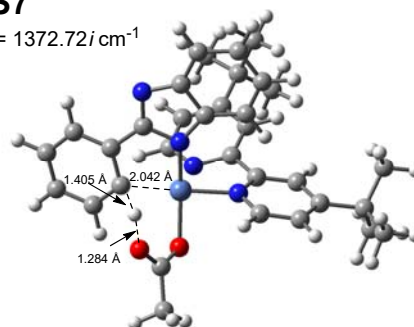

**Int12**

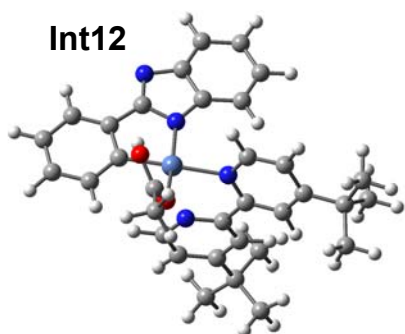

**AcOH**

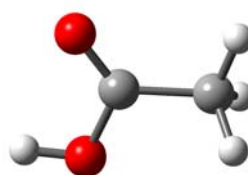

**TS8**

$v^\ddagger = 274.17i \text{ cm}^{-1}$

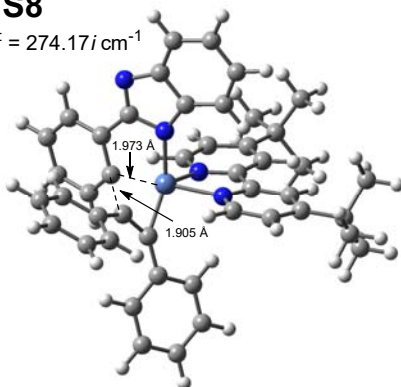

**Int13**

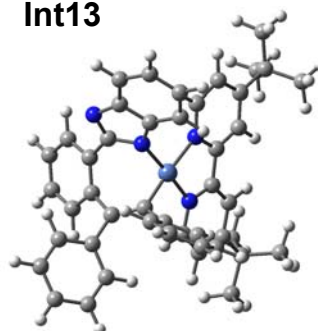

**TS9**

$v^\ddagger = 230.20i \text{ cm}^{-1}$

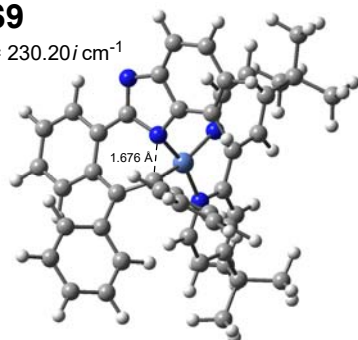

## 10. Cartesian coordinates of the optimized geometries and energies

Scheme 4

Int1

Standard orientation:

| Center<br>Number | Atomic<br>Number | Atomic<br>Type | Coordinates (Angstroms) |           |           |
|------------------|------------------|----------------|-------------------------|-----------|-----------|
|                  |                  |                | X                       | Y         | Z         |
| 1                | 6                | 0              | -1.988275               | 0.646478  | 0.162508  |
| 2                | 6                | 0              | -1.776212               | -0.385683 | -0.582430 |
| 3                | 28               | 0              | -0.155406               | 0.395704  | -0.102765 |
| 4                | 1                | 0              | 0.672630                | -1.894568 | 0.821466  |
| 5                | 6                | 0              | 1.396724                | -1.952016 | 1.628467  |
| 6                | 6                | 0              | 1.208134                | -2.847427 | 2.680910  |
| 7                | 6                | 0              | 2.522752                | -1.111022 | 1.609409  |
| 8                | 6                | 0              | 2.137690                | -2.919176 | 3.723348  |
| 9                | 6                | 0              | 3.452813                | -1.185882 | 2.662817  |
| 10               | 6                | 0              | 3.259871                | -2.084906 | 3.712181  |
| 11               | 1                | 0              | 0.333413                | -3.491803 | 2.683386  |
| 12               | 1                | 0              | 1.986717                | -3.617667 | 4.542064  |
| 13               | 1                | 0              | 3.979356                | -2.124243 | 4.525483  |
| 14               | 1                | 0              | 4.309868                | -0.517273 | 2.687812  |
| 15               | 6                | 0              | -2.900459               | 1.578851  | 0.790795  |
| 16               | 6                | 0              | -4.284873               | 1.553596  | 0.508373  |
| 17               | 6                | 0              | -2.429903               | 2.547524  | 1.701908  |
| 18               | 6                | 0              | -5.156940               | 2.457856  | 1.114012  |
| 19               | 1                | 0              | -4.667070               | 0.823273  | -0.199350 |
| 20               | 6                | 0              | -3.304294               | 3.448542  | 2.309796  |
| 21               | 1                | 0              | -1.367116               | 2.579615  | 1.927125  |
| 22               | 6                | 0              | -4.672877               | 3.409548  | 2.019838  |
| 23               | 1                | 0              | -6.218170               | 2.421029  | 0.878547  |
| 24               | 1                | 0              | -2.917634               | 4.184194  | 3.011334  |
| 25               | 1                | 0              | -5.354225               | 4.112414  | 2.492628  |
| 26               | 6                | 0              | -2.231983               | -1.550595 | -1.310236 |
| 27               | 6                | 0              | -1.375114               | -2.234968 | -2.197628 |

|    |   |   |           |           |           |
|----|---|---|-----------|-----------|-----------|
| 28 | 6 | 0 | -3.547620 | -2.041058 | -1.148538 |
| 29 | 6 | 0 | -1.815378 | -3.357425 | -2.899441 |
| 30 | 1 | 0 | -0.361267 | -1.867188 | -2.332056 |
| 31 | 6 | 0 | -3.983683 | -3.165810 | -1.848421 |
| 32 | 1 | 0 | -4.219821 | -1.536156 | -0.460362 |
| 33 | 6 | 0 | -3.121611 | -3.830140 | -2.729346 |
| 34 | 1 | 0 | -1.137851 | -3.864987 | -3.582232 |
| 35 | 1 | 0 | -4.999940 | -3.526259 | -1.706032 |
| 36 | 1 | 0 | -3.464246 | -4.705158 | -3.275843 |
| 37 | 6 | 0 | 2.738694  | -0.178805 | 0.496018  |
| 38 | 6 | 0 | 3.882388  | 1.053566  | -0.981358 |
| 39 | 6 | 0 | 2.494183  | 1.193122  | -1.187913 |
| 40 | 6 | 0 | 4.830187  | 1.708563  | -1.771747 |
| 41 | 6 | 0 | 2.013134  | 2.019561  | -2.211619 |
| 42 | 6 | 0 | 4.337617  | 2.523555  | -2.789689 |
| 43 | 1 | 0 | 5.896977  | 1.591362  | -1.603981 |
| 44 | 6 | 0 | 2.950498  | 2.676823  | -3.004723 |
| 45 | 1 | 0 | 0.945384  | 2.133220  | -2.371515 |
| 46 | 1 | 0 | 5.036886  | 3.053370  | -3.430522 |
| 47 | 1 | 0 | 2.608426  | 3.322812  | -3.808423 |
| 48 | 7 | 0 | 3.995759  | 0.186696  | 0.093330  |
| 49 | 7 | 0 | 1.807331  | 0.415844  | -0.252744 |
| 50 | 1 | 0 | 4.854651  | -0.209505 | 0.450050  |

-----

SCF Done: E(RB3LYP) = -1319.78416694 A.U. after 1 cycles  
Zero-point correction= 0.393029  
(Hartree/Particle)  
Thermal correction to Energy= 0.418262  
Thermal correction to Enthalpy= 0.419206  
Thermal correction to Gibbs Free Energy= 0.331712  
Sum of electronic and zero-point Energies= -1319.391138  
Sum of electronic and thermal Energies= -1319.365905  
Sum of electronic and thermal Enthalpies= -1319.364961  
Sum of electronic and thermal Free Energies= -1319.452455  
SCF Done: E(RB3PW91) = -1321.28629331 A.U. after 16 cycles

TS1

Standard orientation:

| Center<br>Number | Atomic<br>Number | Atomic<br>Type | Coordinates (Angstroms) |           |           |
|------------------|------------------|----------------|-------------------------|-----------|-----------|
|                  |                  |                | X                       | Y         | Z         |
| 1                | 6                | 0              | -1.012258               | 1.184268  | 0.080833  |
| 2                | 6                | 0              | -1.966952               | 0.373681  | -0.153975 |
| 3                | 28               | 0              | -0.310170               | -0.653360 | -0.180418 |
| 4                | 1                | 0              | -1.255345               | -1.441995 | -0.931783 |
| 5                | 6                | 0              | -0.058614               | -2.550790 | 0.106454  |
| 6                | 6                | 0              | -0.985170               | -3.568266 | 0.377832  |
| 7                | 6                | 0              | 1.314981                | -2.888222 | 0.237817  |
| 8                | 6                | 0              | -0.573400               | -4.856569 | 0.745677  |
| 9                | 6                | 0              | 1.735585                | -4.175685 | 0.604424  |
| 10               | 6                | 0              | 0.786554                | -5.167240 | 0.852392  |
| 11               | 1                | 0              | -2.050239               | -3.364481 | 0.301947  |
| 12               | 1                | 0              | -1.319084               | -5.623487 | 0.943747  |
| 13               | 1                | 0              | 1.103413                | -6.167625 | 1.134550  |
| 14               | 1                | 0              | 2.793782                | -4.404958 | 0.719241  |
| 15               | 6                | 0              | -0.560876               | 2.535498  | 0.347682  |
| 16               | 6                | 0              | -0.858267               | 3.580371  | -0.551678 |
| 17               | 6                | 0              | 0.164502                | 2.839537  | 1.516222  |
| 18               | 6                | 0              | -0.442451               | 4.886194  | -0.285750 |
| 19               | 1                | 0              | -1.412730               | 3.357181  | -1.459101 |
| 20               | 6                | 0              | 0.564186                | 4.149336  | 1.784578  |
| 21               | 1                | 0              | 0.409194                | 2.040060  | 2.209818  |
| 22               | 6                | 0              | 0.266842                | 5.178291  | 0.884421  |
| 23               | 1                | 0              | -0.678245               | 5.678143  | -0.992551 |
| 24               | 1                | 0              | 1.116898                | 4.365161  | 2.695617  |
| 25               | 1                | 0              | 0.586363                | 6.196424  | 1.091205  |
| 26               | 6                | 0              | -3.398165               | 0.145896  | -0.265438 |
| 27               | 6                | 0              | -3.948235               | -0.970054 | -0.918233 |
| 28               | 6                | 0              | -4.277681               | 1.097397  | 0.294265  |
| 29               | 6                | 0              | -5.331610               | -1.133135 | -1.012009 |
| 30               | 1                | 0              | -3.283067               | -1.706895 | -1.359819 |

|    |   |   |           |           |           |
|----|---|---|-----------|-----------|-----------|
| 31 | 6 | 0 | -5.658863 | 0.929171  | 0.204711  |
| 32 | 1 | 0 | -3.865463 | 1.964166  | 0.803199  |
| 33 | 6 | 0 | -6.193362 | -0.186720 | -0.449741 |
| 34 | 1 | 0 | -5.735909 | -2.001889 | -1.525518 |
| 35 | 1 | 0 | -6.319575 | 1.670897  | 0.646688  |
| 36 | 1 | 0 | -7.270222 | -0.316510 | -0.519756 |
| 37 | 6 | 0 | 2.213006  | -1.769475 | 0.021081  |
| 38 | 6 | 0 | 3.982649  | -0.461053 | -0.314903 |
| 39 | 6 | 0 | 2.787722  | 0.297795  | -0.372962 |
| 40 | 6 | 0 | 5.243815  | 0.104609  | -0.507247 |
| 41 | 6 | 0 | 2.847595  | 1.670638  | -0.644922 |
| 42 | 6 | 0 | 5.285018  | 1.474193  | -0.769746 |
| 43 | 1 | 0 | 6.151166  | -0.490861 | -0.460833 |
| 44 | 6 | 0 | 4.104051  | 2.241847  | -0.839573 |
| 45 | 1 | 0 | 1.943351  | 2.264852  | -0.700947 |
| 46 | 1 | 0 | 6.245662  | 1.956619  | -0.927524 |
| 47 | 1 | 0 | 4.175507  | 3.305076  | -1.051703 |
| 48 | 7 | 0 | 3.575810  | -1.763521 | -0.056943 |
| 49 | 7 | 0 | 1.708597  | -0.547906 | -0.143916 |
| 50 | 1 | 0 | 4.174849  | -2.574908 | 0.007951  |

-----

SCF Done: E(RB3LYP) = -1319.73903463 A.U. after 2 cycles  
Zero-point correction= 0.387709  
(Hartree/Particle)  
Thermal correction to Energy= 0.412417  
Thermal correction to Enthalpy= 0.413361  
Thermal correction to Gibbs Free Energy= 0.329652  
Sum of electronic and zero-point Energies= -1319.351326  
Sum of electronic and thermal Energies= -1319.326618  
Sum of electronic and thermal Enthalpies= -1319.325674  
Sum of electronic and thermal Free Energies= -1319.409382  
SCF Done: E(RB3PW91) = -1321.25474350 A.U. after 16 cycles

Int2

Standard orientation:

-----

| Center<br>Number | Atomic<br>Number | Atomic<br>Type | Coordinates (Angstroms) |           |           |
|------------------|------------------|----------------|-------------------------|-----------|-----------|
|                  |                  |                | X                       | Y         | Z         |
| 1                | 6                | 0              | -1.210217               | 0.478788  | -0.036320 |
| 2                | 6                | 0              | -1.905231               | -0.651542 | -0.123083 |
| 3                | 28               | 0              | 0.227020                | -0.792650 | -0.043127 |
| 4                | 1                | 0              | -1.274647               | -1.617388 | -0.237176 |
| 5                | 6                | 0              | 1.242449                | -2.474833 | 0.022059  |
| 6                | 6                | 0              | 0.854262                | -3.823530 | 0.055162  |
| 7                | 6                | 0              | 2.639820                | -2.233181 | 0.067177  |
| 8                | 6                | 0              | 1.795371                | -4.862192 | 0.124540  |
| 9                | 6                | 0              | 3.596948                | -3.255804 | 0.138167  |
| 10               | 6                | 0              | 3.166868                | -4.583077 | 0.166100  |
| 11               | 1                | 0              | -0.201227               | -4.090452 | 0.027456  |
| 12               | 1                | 0              | 1.457946                | -5.896683 | 0.146449  |
| 13               | 1                | 0              | 3.891567                | -5.391165 | 0.220088  |
| 14               | 1                | 0              | 4.662959                | -3.034511 | 0.172346  |
| 15               | 6                | 0              | -1.607832               | 1.878470  | 0.054782  |
| 16               | 6                | 0              | -2.016899               | 2.592406  | -1.090634 |
| 17               | 6                | 0              | -1.559945               | 2.563684  | 1.286043  |
| 18               | 6                | 0              | -2.373881               | 3.939480  | -1.003106 |
| 19               | 1                | 0              | -2.048999               | 2.082574  | -2.050031 |
| 20               | 6                | 0              | -1.928410               | 3.907656  | 1.370554  |
| 21               | 1                | 0              | -1.231490               | 2.032486  | 2.175564  |
| 22               | 6                | 0              | -2.335334               | 4.604422  | 0.227400  |
| 23               | 1                | 0              | -2.686295               | 4.469789  | -1.899654 |
| 24               | 1                | 0              | -1.892013               | 4.413151  | 2.332670  |
| 25               | 1                | 0              | -2.615853               | 5.652411  | 0.294017  |
| 26               | 6                | 0              | -3.321331               | -1.055532 | -0.085236 |
| 27               | 6                | 0              | -3.674770               | -2.409378 | -0.233937 |
| 28               | 6                | 0              | -4.350478               | -0.110992 | 0.099500  |
| 29               | 6                | 0              | -5.011048               | -2.811097 | -0.201247 |
| 30               | 1                | 0              | -2.894086               | -3.153551 | -0.377298 |
| 31               | 6                | 0              | -5.684763               | -0.515076 | 0.131382  |
| 32               | 1                | 0              | -4.101957               | 0.937990  | 0.219943  |
| 33               | 6                | 0              | -6.023692               | -1.864997 | -0.018774 |



|    |   |   |           |           |           |
|----|---|---|-----------|-----------|-----------|
| 34 | 1 | 0 | -5.259941 | -3.862825 | -0.318509 |
| 35 | 1 | 0 | -6.464557 | 0.228649  | 0.275990  |
| 36 | 1 | 0 | -7.065197 | -2.174621 | 0.007419  |
| 37 | 6 | 0 | 2.941479  | -0.814833 | 0.025583  |
| 38 | 6 | 0 | 3.908585  | 1.192486  | -0.047255 |
| 39 | 6 | 0 | 2.500017  | 1.331223  | -0.090118 |
| 40 | 6 | 0 | 4.773295  | 2.286376  | -0.087520 |
| 41 | 6 | 0 | 1.927123  | 2.604867  | -0.183242 |
| 42 | 6 | 0 | 4.186706  | 3.549201  | -0.176066 |
| 43 | 1 | 0 | 5.852219  | 2.162768  | -0.055490 |
| 44 | 6 | 0 | 2.786124  | 3.702211  | -0.224309 |
| 45 | 1 | 0 | 0.852083  | 2.728305  | -0.222062 |
| 46 | 1 | 0 | 4.822274  | 4.429630  | -0.210957 |
| 47 | 1 | 0 | 2.364411  | 4.700914  | -0.296556 |
| 48 | 7 | 0 | 4.143066  | -0.175228 | 0.027483  |
| 49 | 7 | 0 | 1.933771  | 0.062460  | -0.037288 |
| 50 | 1 | 0 | 5.047091  | -0.625123 | 0.066377  |

-----  
SCF Done: E(RB3LYP) = -1319.76955183 A.U. after 2 cycles

Zero-point correction= 0.392925

(Hartree/Particle)

Thermal correction to Energy= 0.417348

Thermal correction to Enthalpy= 0.418292

Thermal correction to Gibbs Free Energy= 0.335016

Sum of electronic and zero-point Energies= -1319.376627

Sum of electronic and thermal Energies= -1319.352204

Sum of electronic and thermal Enthalpies= -1319.351260

Sum of electronic and thermal Free Energies= -1319.434536

SCF Done: E(RB3PW91) = -1321.28026713 A.U. after 16 cycles

PhCCPh

Standard orientation:

-----  
Center      Atomic      Atomic      Coordinates (Angstroms)  
Number      Number      Type      X            Y            Z  
-----

|    |   |   |           |           |           |
|----|---|---|-----------|-----------|-----------|
| 1  | 6 | 0 | -0.608811 | -0.000222 | -0.000227 |
| 2  | 6 | 0 | 0.608811  | 0.000180  | -0.000018 |
| 3  | 6 | 0 | 2.040270  | 0.000089  | 0.000009  |
| 4  | 6 | 0 | 2.756823  | -0.858737 | -0.858373 |
| 5  | 6 | 0 | 2.756895  | 0.858843  | 0.858404  |
| 6  | 6 | 0 | 4.151744  | -0.855729 | -0.855285 |
| 7  | 1 | 0 | 2.210918  | -1.522834 | -1.522199 |
| 8  | 6 | 0 | 4.151816  | 0.855690  | 0.855336  |
| 9  | 1 | 0 | 2.211046  | 1.523003  | 1.522212  |
| 10 | 6 | 0 | 4.854048  | -0.000057 | 0.000033  |
| 11 | 1 | 0 | 4.691364  | -1.523083 | -1.522299 |
| 12 | 1 | 0 | 4.691493  | 1.522993  | 1.522355  |
| 13 | 1 | 0 | 5.940859  | -0.000112 | 0.000041  |
| 14 | 6 | 0 | -2.040270 | -0.000100 | -0.000091 |
| 15 | 6 | 0 | -2.756851 | -0.858799 | 0.858395  |
| 16 | 6 | 0 | -2.756867 | 0.858698  | -0.858465 |
| 17 | 6 | 0 | -4.151772 | -0.855637 | 0.855412  |
| 18 | 1 | 0 | -2.210968 | -1.522931 | 1.522203  |
| 19 | 6 | 0 | -4.151788 | 0.855699  | -0.855293 |
| 20 | 1 | 0 | -2.210997 | 1.522752  | -1.522361 |
| 21 | 6 | 0 | -4.854048 | 0.000075  | 0.000110  |
| 22 | 1 | 0 | -4.691414 | -1.522901 | 1.522497  |
| 23 | 1 | 0 | -4.691443 | 1.523021  | -1.522310 |
| 24 | 1 | 0 | -5.940859 | 0.000140  | 0.000185  |

-----

SCF Done: E(RB3LYP) = -539.483999693 A.U. after 1 cycles  
Zero-point correction= 0.191624  
(Hartree/Particle)  
Thermal correction to Energy= 0.202713  
Thermal correction to Enthalpy= 0.203658  
Thermal correction to Gibbs Free Energy= 0.150820  
Sum of electronic and zero-point Energies= -539.292376  
Sum of electronic and thermal Energies= -539.281286  
Sum of electronic and thermal Enthalpies= -539.280342  
Sum of electronic and thermal Free Energies= -539.333179  
SCF Done: E(RB3PW91) = -539.397622379 A.U. after 13 cycles

Int3

Standard orientation:

| Center<br>Number | Atomic<br>Number | Atomic<br>Type | Coordinates (Angstroms) |           |           |
|------------------|------------------|----------------|-------------------------|-----------|-----------|
|                  |                  |                | X                       | Y         | Z         |
| 1                | 6                | 0              | -4.455313               | 2.257449  | 1.473007  |
| 2                | 6                | 0              | -3.181520               | 2.112617  | 0.901045  |
| 3                | 6                | 0              | -2.623919               | 0.852667  | 0.643014  |
| 4                | 6                | 0              | -3.432073               | -0.262561 | 0.983308  |
| 5                | 6                | 0              | -4.701949               | -0.141667 | 1.566855  |
| 6                | 6                | 0              | -5.214759               | 1.132729  | 1.815635  |
| 7                | 1                | 0              | -4.859281               | 3.252586  | 1.650225  |
| 8                | 1                | 0              | -2.626797               | 3.013458  | 0.642741  |
| 9                | 1                | 0              | -5.290675               | -1.019241 | 1.831210  |
| 10               | 1                | 0              | -6.197164               | 1.247639  | 2.266143  |
| 11               | 6                | 0              | -0.506745               | 2.039534  | -1.023834 |
| 12               | 6                | 0              | 0.761382                | 2.927434  | 1.137187  |
| 13               | 6                | 0              | 0.122170                | 3.254111  | 2.350016  |
| 14               | 6                | 0              | 2.130046                | 3.225810  | 0.978333  |
| 15               | 6                | 0              | 0.836412                | 3.878064  | 3.372197  |
| 16               | 1                | 0              | -0.928213               | 3.014119  | 2.480972  |
| 17               | 6                | 0              | 2.835812                | 3.848826  | 2.007260  |
| 18               | 1                | 0              | 2.628250                | 2.957609  | 0.051991  |
| 19               | 6                | 0              | 2.192995                | 4.177720  | 3.205309  |
| 20               | 1                | 0              | 0.333083                | 4.128889  | 4.302284  |
| 21               | 1                | 0              | 3.890736                | 4.073574  | 1.874115  |
| 22               | 1                | 0              | 2.746482                | 4.661670  | 4.005694  |
| 23               | 6                | 0              | -0.969044               | 2.126005  | -2.385255 |
| 24               | 6                | 0              | -0.248314               | 2.936760  | -3.288389 |
| 25               | 6                | 0              | -2.111290               | 1.441782  | -2.841031 |
| 26               | 6                | 0              | -0.671393               | 3.063656  | -4.610641 |
| 27               | 1                | 0              | 0.638539                | 3.460306  | -2.943419 |
| 28               | 6                | 0              | -2.527054               | 1.576076  | -4.165700 |
| 29               | 1                | 0              | -2.663303               | 0.815928  | -2.148318 |

|    |    |   |           |           |           |
|----|----|---|-----------|-----------|-----------|
| 30 | 6  | 0 | -1.811373 | 2.384345  | -5.054799 |
| 31 | 1  | 0 | -0.108121 | 3.691916  | -5.295741 |
| 32 | 1  | 0 | -3.412231 | 1.044302  | -4.504831 |
| 33 | 1  | 0 | -2.137179 | 2.482528  | -6.086974 |
| 34 | 6  | 0 | 0.040762  | 2.322835  | 0.051461  |
| 35 | 28 | 0 | -0.777785 | 0.296191  | 0.087227  |
| 36 | 6  | 0 | 1.095612  | -0.363364 | 0.012394  |
| 37 | 6  | 0 | 1.903124  | -0.207598 | -1.061579 |
| 38 | 1  | 0 | 1.447418  | 0.202165  | -1.966520 |
| 39 | 6  | 0 | 1.470030  | -1.033014 | 1.280889  |
| 40 | 6  | 0 | 1.188701  | -0.433807 | 2.528167  |
| 41 | 6  | 0 | 2.035343  | -2.327931 | 1.306234  |
| 42 | 6  | 0 | 1.476108  | -1.080486 | 3.733022  |
| 43 | 1  | 0 | 0.757024  | 0.561601  | 2.553954  |
| 44 | 6  | 0 | 2.313194  | -2.980120 | 2.507372  |
| 45 | 1  | 0 | 2.264134  | -2.824399 | 0.368813  |
| 46 | 6  | 0 | 2.038090  | -2.360170 | 3.731935  |
| 47 | 1  | 0 | 1.256266  | -0.581230 | 4.674247  |
| 48 | 1  | 0 | 2.747075  | -3.977613 | 2.487120  |
| 49 | 1  | 0 | 2.256195  | -2.868233 | 4.668164  |
| 50 | 6  | 0 | 3.349217  | -0.481268 | -1.240989 |
| 51 | 6  | 0 | 3.830594  | -0.742234 | -2.540856 |
| 52 | 6  | 0 | 4.294864  | -0.432759 | -0.196164 |
| 53 | 6  | 0 | 5.184571  | -0.981754 | -2.785027 |
| 54 | 1  | 0 | 3.124392  | -0.760796 | -3.369274 |
| 55 | 6  | 0 | 5.649412  | -0.665969 | -0.438468 |
| 56 | 1  | 0 | 3.965217  | -0.200044 | 0.810917  |
| 57 | 6  | 0 | 6.104071  | -0.948946 | -1.731962 |
| 58 | 1  | 0 | 5.521632  | -1.189156 | -3.798267 |
| 59 | 1  | 0 | 6.355823  | -0.619146 | 0.387470  |
| 60 | 1  | 0 | 7.160015  | -1.130224 | -1.916765 |
| 61 | 6  | 0 | -2.812969 | -1.519353 | 0.602985  |
| 62 | 6  | 0 | -2.414470 | -3.629155 | 0.009764  |
| 63 | 6  | 0 | -1.316732 | -2.807665 | -0.341873 |
| 64 | 6  | 0 | -2.458070 | -4.993637 | -0.277696 |
| 65 | 6  | 0 | -0.234959 | -3.356448 | -1.041027 |

|    |   |   |           |           |           |
|----|---|---|-----------|-----------|-----------|
| 66 | 6 | 0 | -1.363670 | -5.527904 | -0.958098 |
| 67 | 1 | 0 | -3.308239 | -5.608810 | 0.003399  |
| 68 | 6 | 0 | -0.274966 | -4.717221 | -1.339834 |
| 69 | 1 | 0 | 0.594525  | -2.728890 | -1.344130 |
| 70 | 1 | 0 | -1.356021 | -6.585419 | -1.207126 |
| 71 | 1 | 0 | 0.552876  | -5.164840 | -1.883201 |
| 72 | 7 | 0 | -3.332151 | -2.778321 | 0.614155  |
| 73 | 7 | 0 | -1.589721 | -1.506156 | 0.067775  |
| 74 | 1 | 0 | -4.252932 | -3.032595 | 0.944246  |

-----  
SCF Done: E(RB3LYP) = -1859.25666236 A.U. after 3 cycles

Zero-point correction= 0.585769

(Hartree/Particle)

Thermal correction to Energy= 0.623041

Thermal correction to Enthalpy= 0.623985

Thermal correction to Gibbs Free Energy= 0.510726

Sum of electronic and zero-point Energies= -1858.670894

Sum of electronic and thermal Energies= -1858.633622

Sum of electronic and thermal Enthalpies= -1858.632677

Sum of electronic and thermal Free Energies= -1858.745936

SCF Done: E(RB3PW91) = -1860.67877022 A.U. after 10 cycles

TS2

Standard orientation:

| Center<br>Number | Atomic<br>Number | Atomic<br>Type | Coordinates (Angstroms) |           |          |
|------------------|------------------|----------------|-------------------------|-----------|----------|
|                  |                  |                | X                       | Y         | Z        |
| 1                | 6                | 0              | -3.646617               | 0.122008  | 3.066817 |
| 2                | 6                | 0              | -2.723392               | 0.604050  | 2.130530 |
| 3                | 6                | 0              | -2.142895               | -0.243356 | 1.177817 |
| 4                | 6                | 0              | -2.475366               | -1.624321 | 1.241653 |
| 5                | 6                | 0              | -3.413652               | -2.102352 | 2.166623 |
| 6                | 6                | 0              | -4.017550               | -1.224825 | 3.068242 |
| 7                | 1                | 0              | -4.084679               | 0.807452  | 3.787996 |
| 8                | 1                | 0              | -2.477063               | 1.660981  | 2.127801 |

|    |    |   |           |           |           |
|----|----|---|-----------|-----------|-----------|
| 9  | 1  | 0 | -3.636040 | -3.166019 | 2.222200  |
| 10 | 1  | 0 | -4.745708 | -1.595747 | 3.783983  |
| 11 | 6  | 0 | -1.939790 | 1.051816  | -0.380785 |
| 12 | 6  | 0 | -0.416489 | 3.150952  | -0.334247 |
| 13 | 6  | 0 | -1.217910 | 4.217550  | 0.132165  |
| 14 | 6  | 0 | 0.822524  | 3.465651  | -0.929021 |
| 15 | 6  | 0 | -0.802607 | 5.542670  | -0.002803 |
| 16 | 1  | 0 | -2.162024 | 3.998245  | 0.623424  |
| 17 | 6  | 0 | 1.226607  | 4.792658  | -1.074993 |
| 18 | 1  | 0 | 1.462530  | 2.661024  | -1.269763 |
| 19 | 6  | 0 | 0.420102  | 5.838949  | -0.613451 |
| 20 | 1  | 0 | -1.436116 | 6.343898  | 0.370296  |
| 21 | 1  | 0 | 2.182251  | 5.009374  | -1.546140 |
| 22 | 1  | 0 | 0.743562  | 6.870948  | -0.722149 |
| 23 | 6  | 0 | -3.182744 | 0.986982  | -1.146390 |
| 24 | 6  | 0 | -3.922118 | 2.163035  | -1.382896 |
| 25 | 6  | 0 | -3.635737 | -0.214719 | -1.721666 |
| 26 | 6  | 0 | -5.075596 | 2.133239  | -2.168126 |
| 27 | 1  | 0 | -3.587318 | 3.100785  | -0.952756 |
| 28 | 6  | 0 | -4.789347 | -0.241074 | -2.505140 |
| 29 | 1  | 0 | -3.068619 | -1.126663 | -1.565212 |
| 30 | 6  | 0 | -5.517353 | 0.931943  | -2.730881 |
| 31 | 1  | 0 | -5.630976 | 3.052343  | -2.337577 |
| 32 | 1  | 0 | -5.117722 | -1.179446 | -2.945326 |
| 33 | 1  | 0 | -6.417256 | 0.910012  | -3.339927 |
| 34 | 6  | 0 | -0.884970 | 1.786702  | -0.171539 |
| 35 | 28 | 0 | -0.382812 | -0.020283 | 0.251870  |
| 36 | 6  | 0 | 1.553314  | 0.183694  | 0.194827  |
| 37 | 6  | 0 | 2.304140  | 0.263248  | -0.923457 |
| 38 | 1  | 0 | 1.763416  | 0.273935  | -1.873311 |
| 39 | 6  | 0 | 2.027476  | 0.113221  | 1.592421  |
| 40 | 6  | 0 | 2.039080  | 1.258252  | 2.417642  |
| 41 | 6  | 0 | 2.413969  | -1.115947 | 2.168446  |
| 42 | 6  | 0 | 2.447559  | 1.181603  | 3.749965  |
| 43 | 1  | 0 | 1.731086  | 2.212372  | 1.997814  |
| 44 | 6  | 0 | 2.818280  | -1.190920 | 3.502981  |

|    |   |   |           |           |           |
|----|---|---|-----------|-----------|-----------|
| 45 | 1 | 0 | 2.405202  | -2.012991 | 1.554478  |
| 46 | 6 | 0 | 2.840516  | -0.043112 | 4.302770  |
| 47 | 1 | 0 | 2.458268  | 2.082406  | 4.359907  |
| 48 | 1 | 0 | 3.120027  | -2.150031 | 3.918712  |
| 49 | 1 | 0 | 3.156464  | -0.101958 | 5.341351  |
| 50 | 6 | 0 | 3.768972  | 0.335673  | -1.124471 |
| 51 | 6 | 0 | 4.249645  | 0.278813  | -2.450948 |
| 52 | 6 | 0 | 4.727571  | 0.471117  | -0.096906 |
| 53 | 6 | 0 | 5.613159  | 0.340777  | -2.743205 |
| 54 | 1 | 0 | 3.533002  | 0.183985  | -3.265109 |
| 55 | 6 | 0 | 6.091133  | 0.535227  | -0.388275 |
| 56 | 1 | 0 | 4.406443  | 0.532054  | 0.935870  |
| 57 | 6 | 0 | 6.546306  | 0.468236  | -1.710043 |
| 58 | 1 | 0 | 5.945490  | 0.292139  | -3.777830 |
| 59 | 1 | 0 | 6.804176  | 0.641232  | 0.426387  |
| 60 | 1 | 0 | 7.609853  | 0.518534  | -1.929842 |
| 61 | 6 | 0 | -1.636980 | -2.497734 | 0.440739  |
| 62 | 6 | 0 | -0.720085 | -4.221049 | -0.624237 |
| 63 | 6 | 0 | 0.114945  | -3.080124 | -0.718488 |
| 64 | 6 | 0 | -0.386462 | -5.446878 | -1.203295 |
| 65 | 6 | 0 | 1.334122  | -3.160410 | -1.406084 |
| 66 | 6 | 0 | 0.826811  | -5.507551 | -1.887747 |
| 67 | 1 | 0 | -1.037597 | -6.312836 | -1.124076 |
| 68 | 6 | 0 | 1.671971  | -4.381646 | -1.984746 |
| 69 | 1 | 0 | 1.985066  | -2.296863 | -1.474329 |
| 70 | 1 | 0 | 1.127934  | -6.441910 | -2.353192 |
| 71 | 1 | 0 | 2.611635  | -4.470862 | -2.522831 |
| 72 | 7 | 0 | -1.819281 | -3.811729 | 0.119418  |
| 73 | 7 | 0 | -0.489696 | -2.029363 | -0.038619 |
| 74 | 1 | 0 | -2.626996 | -4.373123 | 0.352409  |

-----

SCF Done: E(RB3LYP) = -1859.23906214 A.U. after 5 cycles  
Zero-point correction= 0.585791  
(Hartree/Particle)  
Thermal correction to Energy= 0.622034  
Thermal correction to Enthalpy= 0.622978

Thermal correction to Gibbs Free Energy= 0.512065  
 Sum of electronic and zero-point Energies= -1858.653271  
 Sum of electronic and thermal Energies= -1858.617028  
 Sum of electronic and thermal Enthalpies= -1858.616084  
 Sum of electronic and thermal Free Energies= -1858.726997  
 SCF Done: E(RB3PW91) = -1860.66698109 A.U. after 30 cycles

Int4

Standard orientation:

| Center<br>Number | Atomic<br>Number | Atomic<br>Type | Coordinates (Angstroms) |           |           |
|------------------|------------------|----------------|-------------------------|-----------|-----------|
|                  |                  |                | X                       | Y         | Z         |
| 1                | 6                | 0              | -2.080938               | -1.231536 | -4.115450 |
| 2                | 6                | 0              | -2.019661               | -1.501551 | -2.750121 |
| 3                | 6                | 0              | -1.840062               | -0.489277 | -1.786289 |
| 4                | 6                | 0              | -1.747458               | 0.845651  | -2.264600 |
| 5                | 6                | 0              | -1.827055               | 1.113061  | -3.645966 |
| 6                | 6                | 0              | -1.985927               | 0.086703  | -4.572265 |
| 7                | 1                | 0              | -2.202365               | -2.048823 | -4.821836 |
| 8                | 1                | 0              | -2.112685               | -2.527465 | -2.405730 |
| 9                | 1                | 0              | -1.732536               | 2.138999  | -3.993818 |
| 10               | 1                | 0              | -2.027483               | 0.311551  | -5.634315 |
| 11               | 6                | 0              | -1.836270               | -0.872908 | -0.339072 |
| 12               | 6                | 0              | -0.941932               | -0.676292 | 1.996881  |
| 13               | 6                | 0              | -2.001801               | -0.114147 | 2.737386  |
| 14               | 6                | 0              | 0.050647                | -1.381901 | 2.704370  |
| 15               | 6                | 0              | -2.074468               | -0.262937 | 4.124387  |
| 16               | 1                | 0              | -2.774409               | 0.442354  | 2.213614  |
| 17               | 6                | 0              | -0.030412               | -1.545493 | 4.087655  |
| 18               | 1                | 0              | 0.884766                | -1.810316 | 2.158633  |
| 19               | 6                | 0              | -1.091391               | -0.984133 | 4.808152  |
| 20               | 1                | 0              | -2.903534               | 0.182678  | 4.669627  |
| 21               | 1                | 0              | 0.741950                | -2.108953 | 4.606515  |
| 22               | 1                | 0              | -1.147963               | -1.104787 | 5.887197  |
| 23               | 6                | 0              | -2.954714               | -1.793097 | 0.062514  |



|    |    |   |           |           |           |
|----|----|---|-----------|-----------|-----------|
| 24 | 6  | 0 | -2.705913 | -3.000344 | 0.738483  |
| 25 | 6  | 0 | -4.290096 | -1.476909 | -0.249911 |
| 26 | 6  | 0 | -3.752730 | -3.849368 | 1.106775  |
| 27 | 1  | 0 | -1.681570 | -3.274850 | 0.971962  |
| 28 | 6  | 0 | -5.339363 | -2.321444 | 0.119135  |
| 29 | 1  | 0 | -4.508603 | -0.554089 | -0.782679 |
| 30 | 6  | 0 | -5.075300 | -3.513265 | 0.802286  |
| 31 | 1  | 0 | -3.532354 | -4.777481 | 1.628946  |
| 32 | 1  | 0 | -6.363245 | -2.048130 | -0.125901 |
| 33 | 1  | 0 | -5.889985 | -4.173561 | 1.089126  |
| 34 | 6  | 0 | -0.875186 | -0.463651 | 0.529590  |
| 35 | 28 | 0 | 0.515893  | 0.670089  | 0.005308  |
| 36 | 6  | 0 | 2.017136  | -0.431772 | 0.042679  |
| 37 | 6  | 0 | 2.932081  | 0.542759  | 0.291189  |
| 38 | 1  | 0 | 2.541013  | 1.477604  | 0.728090  |
| 39 | 6  | 0 | 4.389227  | 0.627349  | 0.045914  |
| 40 | 6  | 0 | 5.143017  | 1.584548  | 0.754689  |
| 41 | 6  | 0 | 5.065449  | -0.174140 | -0.895935 |
| 42 | 6  | 0 | 6.518352  | 1.719155  | 0.556184  |
| 43 | 1  | 0 | 4.639635  | 2.225510  | 1.476204  |
| 44 | 6  | 0 | 6.439208  | -0.037670 | -1.097584 |
| 45 | 1  | 0 | 4.509106  | -0.900419 | -1.479013 |
| 46 | 6  | 0 | 7.176158  | 0.904999  | -0.370763 |
| 47 | 1  | 0 | 7.074844  | 2.461738  | 1.123286  |
| 48 | 1  | 0 | 6.936338  | -0.666572 | -1.832536 |
| 49 | 1  | 0 | 8.246254  | 1.008302  | -0.531777 |
| 50 | 6  | 0 | 2.277488  | -1.836622 | -0.296294 |
| 51 | 6  | 0 | 1.602445  | -2.464105 | -1.362175 |
| 52 | 6  | 0 | 3.165497  | -2.618868 | 0.472649  |
| 53 | 6  | 0 | 1.831160  | -3.806709 | -1.668801 |
| 54 | 1  | 0 | 0.895948  | -1.885560 | -1.950329 |
| 55 | 6  | 0 | 3.377721  | -3.966893 | 0.180254  |
| 56 | 1  | 0 | 3.687989  | -2.157117 | 1.306521  |
| 57 | 6  | 0 | 2.717038  | -4.567222 | -0.897557 |
| 58 | 1  | 0 | 1.307026  | -4.264273 | -2.504905 |
| 59 | 1  | 0 | 4.063112  | -4.548946 | 0.792220  |

|    |   |   |           |           |           |
|----|---|---|-----------|-----------|-----------|
| 60 | 1 | 0 | 2.884548  | -5.616333 | -1.128476 |
| 61 | 6 | 0 | -1.605383 | 2.003805  | -1.369618 |
| 62 | 6 | 0 | -0.926700 | 3.399566  | 0.170357  |
| 63 | 6 | 0 | -1.960333 | 4.049987  | -0.538928 |
| 64 | 6 | 0 | -0.284194 | 4.042356  | 1.235727  |
| 65 | 6 | 0 | -2.388687 | 5.340314  | -0.217551 |
| 66 | 6 | 0 | -0.705484 | 5.329375  | 1.560634  |
| 67 | 1 | 0 | 0.507389  | 3.547013  | 1.790033  |
| 68 | 6 | 0 | -1.741506 | 5.968584  | 0.845466  |
| 69 | 1 | 0 | -3.185751 | 5.832403  | -0.767408 |
| 70 | 1 | 0 | -0.229361 | 5.854249  | 2.383996  |
| 71 | 1 | 0 | -2.041880 | 6.973059  | 1.129998  |
| 72 | 7 | 0 | -0.730366 | 2.136996  | -0.379200 |
| 73 | 7 | 0 | -2.357855 | 3.141167  | -1.506961 |
| 74 | 1 | 0 | -3.131599 | 3.246857  | -2.149609 |

-----  
SCF Done: E(RB3LYP) = -1859.30363181 A.U. after 4 cycles

Zero-point correction= 0.587933

(Hartree/Particle)

Thermal correction to Energy= 0.624127

Thermal correction to Enthalpy= 0.625071

Thermal correction to Gibbs Free Energy= 0.514791

Sum of electronic and zero-point Energies= -1858.715699

Sum of electronic and thermal Energies= -1858.679505

Sum of electronic and thermal Enthalpies= -1858.678560

Sum of electronic and thermal Free Energies= -1858.788841

SCF Done: E(RB3PW91) = -1860.72463574 A.U. after 21 cycles

TS3

Standard orientation:

-----

| Center<br>Number | Atomic<br>Number | Atomic<br>Type | Coordinates (Angstroms) |           |           |
|------------------|------------------|----------------|-------------------------|-----------|-----------|
|                  |                  |                | X                       | Y         | Z         |
| 1                | 6                | 0              | -2.541163               | -2.475829 | -3.662201 |
| 2                | 6                | 0              | -2.183242               | -2.420556 | -2.334409 |

-----

|    |    |   |           |           |           |
|----|----|---|-----------|-----------|-----------|
| 3  | 6  | 0 | -1.986968 | -1.179488 | -1.647100 |
| 4  | 6  | 0 | -2.190789 | 0.018150  | -2.431245 |
| 5  | 6  | 0 | -2.579974 | -0.067642 | -3.798415 |
| 6  | 6  | 0 | -2.749425 | -1.286988 | -4.411171 |
| 7  | 1  | 0 | -2.649309 | -3.442284 | -4.147958 |
| 8  | 1  | 0 | -2.012529 | -3.342605 | -1.789925 |
| 9  | 1  | 0 | -2.703951 | 0.846105  | -4.375573 |
| 10 | 1  | 0 | -3.019556 | -1.341212 | -5.461834 |
| 11 | 6  | 0 | -1.684827 | -1.132380 | -0.255021 |
| 12 | 6  | 0 | -1.332987 | 0.246581  | 1.850156  |
| 13 | 6  | 0 | -2.627420 | 0.313096  | 2.395040  |
| 14 | 6  | 0 | -0.233407 | 0.412349  | 2.707222  |
| 15 | 6  | 0 | -2.818568 | 0.541409  | 3.758976  |
| 16 | 1  | 0 | -3.487254 | 0.185712  | 1.742166  |
| 17 | 6  | 0 | -0.422595 | 0.624942  | 4.075028  |
| 18 | 1  | 0 | 0.767778  | 0.372138  | 2.287802  |
| 19 | 6  | 0 | -1.715201 | 0.695639  | 4.604585  |
| 20 | 1  | 0 | -3.827116 | 0.594766  | 4.161530  |
| 21 | 1  | 0 | 0.440766  | 0.739142  | 4.725901  |
| 22 | 1  | 0 | -1.862048 | 0.869186  | 5.667720  |
| 23 | 6  | 0 | -1.898146 | -2.355725 | 0.581068  |
| 24 | 6  | 0 | -0.834381 | -2.948276 | 1.282681  |
| 25 | 6  | 0 | -3.172848 | -2.943061 | 0.685670  |
| 26 | 6  | 0 | -1.040289 | -4.084194 | 2.070374  |
| 27 | 1  | 0 | 0.162760  | -2.527253 | 1.193859  |
| 28 | 6  | 0 | -3.380809 | -4.076867 | 1.473538  |
| 29 | 1  | 0 | -4.008548 | -2.498925 | 0.150084  |
| 30 | 6  | 0 | -2.313352 | -4.651920 | 2.171683  |
| 31 | 1  | 0 | -0.200556 | -4.527879 | 2.599631  |
| 32 | 1  | 0 | -4.376454 | -4.508511 | 1.545307  |
| 33 | 1  | 0 | -2.472878 | -5.534984 | 2.785505  |
| 34 | 6  | 0 | -1.148443 | 0.026181  | 0.379199  |
| 35 | 28 | 0 | 0.308208  | 0.875520  | -0.433130 |
| 36 | 6  | 0 | 2.101240  | 0.247504  | -0.229933 |
| 37 | 6  | 0 | 3.022878  | 1.242516  | -0.090757 |
| 38 | 1  | 0 | 2.640392  | 2.250307  | 0.096823  |

|    |   |   |           |           |           |
|----|---|---|-----------|-----------|-----------|
| 39 | 6 | 0 | 4.503127  | 1.229001  | -0.161890 |
| 40 | 6 | 0 | 5.209464  | 2.305700  | 0.415084  |
| 41 | 6 | 0 | 5.259713  | 0.234652  | -0.816755 |
| 42 | 6 | 0 | 6.603057  | 2.374541  | 0.373572  |
| 43 | 1 | 0 | 4.648593  | 3.097620  | 0.908739  |
| 44 | 6 | 0 | 6.652810  | 0.304139  | -0.864089 |
| 45 | 1 | 0 | 4.752098  | -0.592815 | -1.299569 |
| 46 | 6 | 0 | 7.335783  | 1.369223  | -0.265254 |
| 47 | 1 | 0 | 7.116132  | 3.214984  | 0.835905  |
| 48 | 1 | 0 | 7.208903  | -0.476562 | -1.378422 |
| 49 | 1 | 0 | 8.421169  | 1.418869  | -0.304682 |
| 50 | 6 | 0 | 2.437665  | -1.189566 | -0.314188 |
| 51 | 6 | 0 | 2.037714  | -1.972521 | -1.416742 |
| 52 | 6 | 0 | 3.096377  | -1.849521 | 0.745707  |
| 53 | 6 | 0 | 2.317872  | -3.339216 | -1.477179 |
| 54 | 1 | 0 | 1.503748  | -1.493451 | -2.234046 |
| 55 | 6 | 0 | 3.360293  | -3.219987 | 0.695503  |
| 56 | 1 | 0 | 3.407634  | -1.271586 | 1.612724  |
| 57 | 6 | 0 | 2.979520  | -3.974341 | -0.420078 |
| 58 | 1 | 0 | 2.007395  | -3.912722 | -2.348069 |
| 59 | 1 | 0 | 3.870411  | -3.699439 | 1.528593  |
| 60 | 1 | 0 | 3.187026  | -5.040832 | -0.461123 |
| 61 | 6 | 0 | -2.128021 | 1.264071  | -1.776140 |
| 62 | 6 | 0 | -1.842899 | 2.758533  | -0.112134 |
| 63 | 6 | 0 | -2.580025 | 3.379434  | -1.138138 |
| 64 | 6 | 0 | -1.499255 | 3.456402  | 1.046316  |
| 65 | 6 | 0 | -3.015784 | 4.701224  | -1.037297 |
| 66 | 6 | 0 | -1.935910 | 4.779204  | 1.153255  |
| 67 | 1 | 0 | -0.924596 | 2.989287  | 1.836780  |
| 68 | 6 | 0 | -2.683874 | 5.389857  | 0.130847  |
| 69 | 1 | 0 | -3.587197 | 5.173023  | -1.831130 |
| 70 | 1 | 0 | -1.688484 | 5.346551  | 2.045565  |
| 71 | 1 | 0 | -3.007351 | 6.420179  | 0.248433  |
| 72 | 7 | 0 | -1.542162 | 1.440376  | -0.544568 |
| 73 | 7 | 0 | -2.721082 | 2.441810  | -2.153835 |
| 74 | 1 | 0 | -3.355549 | 2.525710  | -2.936467 |

```

-----
SCF Done: E(RB3LYP) = -1859.25466071 A.U. after 5 cycles
Zero-point correction= 0.586704
(Hartree/Particle)
Thermal correction to Energy= 0.622286
Thermal correction to Enthalpy= 0.623231
Thermal correction to Gibbs Free Energy= 0.515122
Sum of electronic and zero-point Energies= -1858.667956
Sum of electronic and thermal Energies= -1858.632374
Sum of electronic and thermal Enthalpies= -1858.631430
Sum of electronic and thermal Free Energies= -1858.739538
SCF Done: E(RB3PW91) = -1860.67630050 A.U. after 18 cycles

```

Int5

Standard orientation:

```

-----
Center      Atomic      Atomic      Coordinates (Angstroms)
Number      Number      Type        X           Y           Z
-----
  1          6           0          -3.415414   -2.590651   -3.132862
  2          6           0          -2.863805   -2.465798   -1.883966
  3          6           0          -2.440917   -1.192698   -1.363781
  4          6           0          -2.612658   -0.050683   -2.244572
  5          6           0          -3.198994   -0.214543   -3.538334
  6          6           0          -3.594722   -1.451132   -3.976342
  7          1           0          -3.709433   -3.572650   -3.494372
  8          1           0          -2.720771   -3.347546   -1.269337
  9          1           0          -3.314412    0.647312   -4.191714
 10         1           0          -4.029237   -1.569739   -4.964749
 11         6           0          -1.909311   -1.041162   -0.071484
 12         6           0          -1.439511    0.521987    1.873330
 13         6           0          -2.678169    0.885416    2.425797
 14         6           0          -0.322499    0.436328    2.713952
 15         6           0          -2.795512    1.171955    3.787656
 16         1           0          -3.555144    0.943990    1.784671
 17         6           0          -0.441356    0.706850    4.080314

```

|    |    |   |           |           |           |
|----|----|---|-----------|-----------|-----------|
| 18 | 1  | 0 | 0.637617  | 0.164851  | 2.285187  |
| 19 | 6  | 0 | -1.675419 | 1.081577  | 4.620292  |
| 20 | 1  | 0 | -3.760622 | 1.458683  | 4.198053  |
| 21 | 1  | 0 | 0.433464  | 0.629250  | 4.721065  |
| 22 | 1  | 0 | -1.764728 | 1.299617  | 5.681551  |
| 23 | 6  | 0 | -1.899782 | -2.196347 | 0.878617  |
| 24 | 6  | 0 | -0.696443 | -2.801070 | 1.275700  |
| 25 | 6  | 0 | -3.105741 | -2.700720 | 1.396447  |
| 26 | 6  | 0 | -0.699562 | -3.878169 | 2.166536  |
| 27 | 1  | 0 | 0.242933  | -2.435541 | 0.872851  |
| 28 | 6  | 0 | -3.109882 | -3.774739 | 2.289391  |
| 29 | 1  | 0 | -4.045685 | -2.241694 | 1.099592  |
| 30 | 6  | 0 | -1.904394 | -4.367540 | 2.678648  |
| 31 | 1  | 0 | 0.243302  | -4.336037 | 2.455290  |
| 32 | 1  | 0 | -4.053549 | -4.145767 | 2.682308  |
| 33 | 1  | 0 | -1.905331 | -5.204457 | 3.372657  |
| 34 | 6  | 0 | -1.348839 | 0.211904  | 0.396724  |
| 35 | 28 | 0 | 0.255439  | 0.721814  | -0.523064 |
| 36 | 6  | 0 | 2.041475  | 0.076403  | -0.347122 |
| 37 | 6  | 0 | 2.976705  | 1.022166  | -0.042958 |
| 38 | 1  | 0 | 2.608902  | 1.997246  | 0.285772  |
| 39 | 6  | 0 | 4.457897  | 0.983111  | -0.085794 |
| 40 | 6  | 0 | 5.174932  | 1.904277  | 0.706778  |
| 41 | 6  | 0 | 5.205866  | 0.123598  | -0.917070 |
| 42 | 6  | 0 | 6.570321  | 1.944307  | 0.702229  |
| 43 | 1  | 0 | 4.621172  | 2.594996  | 1.340545  |
| 44 | 6  | 0 | 6.600775  | 0.166814  | -0.929142 |
| 45 | 1  | 0 | 4.689815  | -0.574697 | -1.566811 |
| 46 | 6  | 0 | 7.294029  | 1.070995  | -0.115962 |
| 47 | 1  | 0 | 7.091990  | 2.660660  | 1.333148  |
| 48 | 1  | 0 | 7.150225  | -0.506270 | -1.583623 |
| 49 | 1  | 0 | 8.380786  | 1.100739  | -0.128136 |
| 50 | 6  | 0 | 2.374329  | -1.336923 | -0.633584 |
| 51 | 6  | 0 | 1.964916  | -1.958628 | -1.831775 |
| 52 | 6  | 0 | 3.042192  | -2.139547 | 0.316686  |
| 53 | 6  | 0 | 2.241342  | -3.303628 | -2.085174 |

|    |   |   |           |           |           |
|----|---|---|-----------|-----------|-----------|
| 54 | 1 | 0 | 1.424332  | -1.369595 | -2.569610 |
| 55 | 6 | 0 | 3.303206  | -3.489706 | 0.073235  |
| 56 | 1 | 0 | 3.360372  | -1.689433 | 1.254110  |
| 57 | 6 | 0 | 2.910477  | -4.081007 | -1.132645 |
| 58 | 1 | 0 | 1.922494  | -3.749761 | -3.024892 |
| 59 | 1 | 0 | 3.819799  | -4.081109 | 0.826612  |
| 60 | 1 | 0 | 3.114824  | -5.131693 | -1.323593 |
| 61 | 6 | 0 | -2.245563 | 1.198015  | -1.752920 |
| 62 | 6 | 0 | -1.556097 | 2.771188  | -0.241564 |
| 63 | 6 | 0 | -2.081267 | 3.424454  | -1.371259 |
| 64 | 6 | 0 | -1.051429 | 3.498772  | 0.836133  |
| 65 | 6 | 0 | -2.131073 | 4.815354  | -1.459393 |
| 66 | 6 | 0 | -1.102627 | 4.894123  | 0.751711  |
| 67 | 1 | 0 | -0.638861 | 3.009564  | 1.708313  |
| 68 | 6 | 0 | -1.634261 | 5.541455  | -0.374852 |
| 69 | 1 | 0 | -2.541867 | 5.309831  | -2.334235 |
| 70 | 1 | 0 | -0.718007 | 5.484302  | 1.577957  |
| 71 | 1 | 0 | -1.658959 | 6.626892  | -0.407271 |
| 72 | 7 | 0 | -1.626063 | 1.368292  | -0.510316 |
| 73 | 7 | 0 | -2.476936 | 2.446307  | -2.270990 |
| 74 | 1 | 0 | -2.976009 | 2.616917  | -3.132133 |

-----  
SCF Done: E(RB3LYP) = -1859.25918432 A.U. after 4 cycles

Zero-point correction= 0.587932

(Hartree/Particle)

Thermal correction to Energy= 0.624039

Thermal correction to Enthalpy= 0.624983

Thermal correction to Gibbs Free Energy= 0.516133

Sum of electronic and zero-point Energies= -1858.671252

Sum of electronic and thermal Energies= -1858.635145

Sum of electronic and thermal Enthalpies= -1858.634201

Sum of electronic and thermal Free Energies= -1858.743051

SCF Done: E(RB3PW91) = -1860.68132577 A.U. after 25 cycles

SM

Standard orientation:

| Center<br>Number | Atomic<br>Number | Atomic<br>Type | Coordinates (Angstroms) |           |           |
|------------------|------------------|----------------|-------------------------|-----------|-----------|
|                  |                  |                | X                       | Y         | Z         |
| 1                | 6                | 0              | 4.534699                | -0.028168 | 0.005292  |
| 2                | 6                | 0              | 3.843086                | 1.185367  | -0.042108 |
| 3                | 6                | 0              | 2.447035                | 1.198933  | -0.047198 |
| 4                | 6                | 0              | 1.719524                | -0.003357 | -0.003664 |
| 5                | 6                | 0              | 2.424941                | -1.220117 | 0.042641  |
| 6                | 6                | 0              | 3.818380                | -1.230070 | 0.046901  |
| 7                | 1                | 0              | 5.621411                | -0.037708 | 0.008955  |
| 8                | 1                | 0              | 4.388814                | 2.124512  | -0.077492 |
| 9                | 1                | 0              | 1.937497                | 2.157977  | -0.092191 |
| 10               | 1                | 0              | 1.862976                | -2.147551 | 0.075729  |
| 11               | 1                | 0              | 4.348038                | -2.178460 | 0.083721  |
| 12               | 6                | 0              | 0.250980                | -0.032166 | -0.005167 |
| 13               | 6                | 0              | -1.797595               | -0.707152 | -0.020449 |
| 14               | 6                | 0              | -1.854107               | 0.708738  | 0.017020  |
| 15               | 6                | 0              | -2.986336               | -1.452491 | -0.038637 |
| 16               | 6                | 0              | -3.060687               | 1.413595  | 0.039276  |
| 17               | 6                | 0              | -4.193716               | -0.757894 | -0.016991 |
| 18               | 1                | 0              | -2.954687               | -2.537953 | -0.068123 |
| 19               | 6                | 0              | -4.230606               | 0.653840  | 0.021741  |
| 20               | 1                | 0              | -3.092359               | 2.499443  | 0.068479  |
| 21               | 1                | 0              | -5.129608               | -1.310200 | -0.029967 |
| 22               | 1                | 0              | -5.192046               | 1.160193  | 0.038056  |
| 23               | 7                | 0              | -0.480959               | -1.132211 | -0.033234 |
| 24               | 7                | 0              | -0.530699               | 1.108394  | 0.023650  |
| 25               | 1                | 0              | -0.202007               | 2.062112  | 0.067977  |

SCF Done: E(RB3LYP) = -610.957845118 A.U. after 1 cycles  
Zero-point correction= 0.199299  
(Hartree/Particle)  
Thermal correction to Energy= 0.210069  
Thermal correction to Enthalpy= 0.211013  
Thermal correction to Gibbs Free Energy= 0.161744



Sum of electronic and zero-point Energies= -610.758546  
 Sum of electronic and thermal Energies= -610.747776  
 Sum of electronic and thermal Enthalpies= -610.746832  
 Sum of electronic and thermal Free Energies= -610.796101  
 SCF Done: E(RB3PW91) = -610.871079190 A.U. after 12 cycles

product

Standard orientation:

| Center<br>Number | Atomic<br>Number | Atomic<br>Type | Coordinates (Angstroms) |           |           |
|------------------|------------------|----------------|-------------------------|-----------|-----------|
|                  |                  |                | X                       | Y         | Z         |
| 1                | 6                | 0              | 3.475792                | 0.915602  | 0.012683  |
| 2                | 6                | 0              | 2.596796                | -0.200047 | 0.028593  |
| 3                | 6                | 0              | 3.086646                | -1.512997 | 0.075438  |
| 4                | 6                | 0              | 4.470465                | -1.679886 | 0.097578  |
| 5                | 6                | 0              | 5.351594                | -0.577805 | 0.075071  |
| 6                | 6                | 0              | 4.866886                | 0.724060  | 0.033575  |
| 7                | 6                | 0              | 1.504221                | 1.754528  | -0.018672 |
| 8                | 1                | 0              | 2.434994                | -2.375724 | 0.096155  |
| 9                | 1                | 0              | 4.875906                | -2.687458 | 0.134032  |
| 10               | 1                | 0              | 6.424097                | -0.753391 | 0.092899  |
| 11               | 1                | 0              | 5.532357                | 1.582553  | 0.020060  |
| 12               | 6                | 0              | 0.355948                | 2.622411  | -0.029159 |
| 13               | 6                | 0              | -0.938379               | 2.039536  | -0.011470 |
| 14               | 6                | 0              | 0.511416                | 4.022587  | -0.053406 |
| 15               | 6                | 0              | -2.057232               | 2.904818  | -0.024395 |
| 16               | 6                | 0              | -0.602956               | 4.847255  | -0.062362 |
| 17               | 1                | 0              | 1.515546                | 4.434074  | -0.065139 |
| 18               | 6                | 0              | -1.892096               | 4.282533  | -0.048624 |
| 19               | 1                | 0              | -3.056166               | 2.482009  | -0.016903 |
| 20               | 1                | 0              | -0.480878               | 5.926814  | -0.081043 |
| 21               | 1                | 0              | -2.766519               | 4.928043  | -0.058258 |
| 22               | 6                | 0              | -1.073173               | 0.588004  | 0.004769  |
| 23               | 6                | 0              | 0.033590                | -0.217838 | 0.002315  |
| 24               | 6                | 0              | -0.048259               | -1.708704 | -0.013598 |

|    |   |   |           |           |           |
|----|---|---|-----------|-----------|-----------|
| 25 | 6 | 0 | -0.196737 | -2.428514 | 1.180290  |
| 26 | 6 | 0 | 0.021916  | -2.405382 | -1.229231 |
| 27 | 6 | 0 | -0.268930 | -3.823948 | 1.159589  |
| 28 | 1 | 0 | -0.252522 | -1.895455 | 2.125617  |
| 29 | 6 | 0 | -0.051070 | -3.799908 | -1.249870 |
| 30 | 1 | 0 | 0.138768  | -1.853582 | -2.158433 |
| 31 | 6 | 0 | -0.194328 | -4.512358 | -0.054893 |
| 32 | 1 | 0 | -0.383973 | -4.371207 | 2.091503  |
| 33 | 1 | 0 | 0.003737  | -4.328688 | -2.197850 |
| 34 | 1 | 0 | -0.249940 | -5.597690 | -0.070770 |
| 35 | 6 | 0 | -2.445398 | -0.015269 | 0.013074  |
| 36 | 6 | 0 | -3.148027 | -0.168997 | 1.218430  |
| 37 | 6 | 0 | -3.067982 | -0.402301 | -1.183099 |
| 38 | 6 | 0 | -4.436772 | -0.709351 | 1.229856  |
| 39 | 1 | 0 | -2.679827 | 0.135668  | 2.151419  |
| 40 | 6 | 0 | -4.357022 | -0.942855 | -1.174419 |
| 41 | 1 | 0 | -2.538925 | -0.279891 | -2.124857 |
| 42 | 6 | 0 | -5.044614 | -1.099235 | 0.032563  |
| 43 | 1 | 0 | -4.964228 | -0.825792 | 2.173349  |
| 44 | 1 | 0 | -4.822275 | -1.241624 | -2.110447 |
| 45 | 1 | 0 | -6.046932 | -1.519820 | 0.040194  |
| 46 | 7 | 0 | 2.776579  | 2.102845  | -0.015903 |
| 47 | 7 | 0 | 1.309565  | 0.363659  | 0.000864  |

-----

SCF Done: E(RB3LYP) = -1149.29395473 A.U. after 2 cycles  
Zero-point correction= 0.373014  
(Hartree/Particle)  
Thermal correction to Energy= 0.394056  
Thermal correction to Enthalpy= 0.395000  
Thermal correction to Gibbs Free Energy= 0.321484  
Sum of electronic and zero-point Energies= -1148.920941  
Sum of electronic and thermal Energies= -1148.899899  
Sum of electronic and thermal Enthalpies= -1148.898955  
Sum of electronic and thermal Free Energies= -1148.972470  
SCF Done: E(RB3PW91) = -1149.12017708 A.U. after 14 cycles

cis-alkene

Standard orientation:

| Center<br>Number | Atomic<br>Number | Atomic<br>Type | Coordinates (Angstroms) |           |           |
|------------------|------------------|----------------|-------------------------|-----------|-----------|
|                  |                  |                | X                       | Y         | Z         |
| 1                | 6                | 0              | -0.675974               | 1.837035  | 0.001384  |
| 2                | 1                | 0              | -1.144590               | 2.820922  | -0.038592 |
| 3                | 6                | 0              | 0.675904                | 1.836826  | -0.001150 |
| 4                | 1                | 0              | 1.144788                | 2.820575  | 0.039008  |
| 5                | 6                | 0              | -1.643448               | 0.723167  | 0.070771  |
| 6                | 6                | 0              | -2.886508               | 0.862053  | -0.576430 |
| 7                | 6                | 0              | -1.415300               | -0.446865 | 0.820577  |
| 8                | 6                | 0              | -3.851208               | -0.145650 | -0.513132 |
| 9                | 1                | 0              | -3.092303               | 1.769105  | -1.141073 |
| 10               | 6                | 0              | -2.382545               | -1.449546 | 0.893917  |
| 11               | 1                | 0              | -0.480045               | -0.563893 | 1.358966  |
| 12               | 6                | 0              | -3.602109               | -1.308709 | 0.221410  |
| 13               | 1                | 0              | -4.798795               | -0.018609 | -1.030756 |
| 14               | 1                | 0              | -2.186881               | -2.341132 | 1.484665  |
| 15               | 1                | 0              | -4.353539               | -2.091938 | 0.279718  |
| 16               | 6                | 0              | 1.643259                | 0.722919  | -0.070882 |
| 17               | 6                | 0              | 2.886621                | 0.862270  | 0.575742  |
| 18               | 6                | 0              | 1.415041                | -0.447488 | -0.820049 |
| 19               | 6                | 0              | 3.851460                | -0.145274 | 0.512533  |
| 20               | 1                | 0              | 3.092511                | 1.769621  | 1.139867  |
| 21               | 6                | 0              | 2.382454                | -1.450035 | -0.893319 |
| 22               | 1                | 0              | 0.479684                | -0.564995 | -1.358132 |
| 23               | 6                | 0              | 3.602261                | -1.308719 | -0.221388 |
| 24               | 1                | 0              | 4.799243                | -0.017808 | 1.029692  |
| 25               | 1                | 0              | 2.186676                | -2.341905 | -1.483598 |
| 26               | 1                | 0              | 4.353801                | -2.091844 | -0.279674 |

SCF Done: E(RB3LYP) = -540.724309507 A.U. after 1 cycles  
Zero-point correction= 0.215114  
(Hartree/Particle)

Thermal correction to Energy= 0.226206  
 Thermal correction to Enthalpy= 0.227151  
 Thermal correction to Gibbs Free Energy= 0.176472  
 Sum of electronic and zero-point Energies= -540.509195  
 Sum of electronic and thermal Energies= -540.498103  
 Sum of electronic and thermal Enthalpies= -540.497159  
 Sum of electronic and thermal Free Energies= -540.547838  
 SCF Done: E(RB3PW91) = -540.641809612 A.U. after 13 cycles

Int6

Standard orientation:

| -----  |        |        |                         |           |           |  |
|--------|--------|--------|-------------------------|-----------|-----------|--|
| Center | Atomic | Atomic | Coordinates (Angstroms) |           |           |  |
| Number | Number | Type   | X                       | Y         | Z         |  |
| -----  |        |        |                         |           |           |  |
| 1      | 6      | 0      | -1.818357               | -0.831379 | -0.117712 |  |
| 2      | 6      | 0      | -0.793821               | -1.604427 | -0.025603 |  |
| 3      | 28     | 0      | -0.250923               | 0.155993  | -0.359690 |  |
| 4      | 1      | 0      | 1.193445                | 1.595675  | -1.861871 |  |
| 5      | 6      | 0      | 4.435451                | 1.035478  | 0.601049  |  |
| 6      | 6      | 0      | 5.576581                | 0.264110  | 0.390224  |  |
| 7      | 6      | 0      | 3.282316                | 0.825777  | -0.178003 |  |
| 8      | 6      | 0      | 5.590754                | -0.719629 | -0.605461 |  |
| 9      | 6      | 0      | 3.300819                | -0.170485 | -1.170612 |  |
| 10     | 6      | 0      | 4.449704                | -0.933090 | -1.384517 |  |
| 11     | 1      | 0      | 6.459541                | 0.434395  | 1.000388  |  |
| 12     | 1      | 0      | 6.483158                | -1.317473 | -0.770232 |  |
| 13     | 1      | 0      | 4.447327                | -1.701760 | -2.152512 |  |
| 14     | 1      | 0      | 2.411701                | -0.377262 | -1.760762 |  |
| 15     | 6      | 0      | -3.243840               | -0.582584 | -0.129561 |  |
| 16     | 6      | 0      | -4.152108               | -1.608063 | -0.473630 |  |
| 17     | 6      | 0      | -3.765264               | 0.685526  | 0.200221  |  |
| 18     | 6      | 0      | -5.526803               | -1.372373 | -0.480076 |  |
| 19     | 1      | 0      | -3.768797               | -2.587287 | -0.745838 |  |
| 20     | 6      | 0      | -5.141063               | 0.915437  | 0.198666  |  |
| 21     | 1      | 0      | -3.077697               | 1.483699  | 0.465369  |  |

|    |   |   |           |           |           |
|----|---|---|-----------|-----------|-----------|
| 22 | 6 | 0 | -6.029571 | -0.110778 | -0.141613 |
| 23 | 1 | 0 | -6.207999 | -2.175975 | -0.749724 |
| 24 | 1 | 0 | -5.521830 | 1.898576  | 0.465059  |
| 25 | 1 | 0 | -7.101356 | 0.070250  | -0.144150 |
| 26 | 6 | 0 | -0.216253 | -2.903131 | 0.253103  |
| 27 | 6 | 0 | 1.176924  | -3.074670 | 0.377980  |
| 28 | 6 | 0 | -1.043843 | -4.035981 | 0.418740  |
| 29 | 6 | 0 | 1.722719  | -4.328280 | 0.654968  |
| 30 | 1 | 0 | 1.826166  | -2.212121 | 0.261306  |
| 31 | 6 | 0 | -0.495490 | -5.287859 | 0.695294  |
| 32 | 1 | 0 | -2.120733 | -3.923130 | 0.335026  |
| 33 | 6 | 0 | 0.890896  | -5.442034 | 0.813525  |
| 34 | 1 | 0 | 2.800619  | -4.435622 | 0.749982  |
| 35 | 1 | 0 | -1.151936 | -6.145659 | 0.821061  |
| 36 | 1 | 0 | 1.316793  | -6.418584 | 1.029239  |
| 37 | 6 | 0 | 2.112466  | 1.681968  | 0.042672  |
| 38 | 6 | 0 | 0.794603  | 3.236865  | 0.766723  |
| 39 | 6 | 0 | 0.187965  | 2.769612  | -0.418240 |
| 40 | 6 | 0 | 0.209301  | 4.286319  | 1.484804  |
| 41 | 6 | 0 | -0.964823 | 3.341264  | -0.953327 |
| 42 | 6 | 0 | -0.953171 | 4.858426  | 0.967638  |
| 43 | 1 | 0 | 0.660489  | 4.644406  | 2.405223  |
| 44 | 6 | 0 | -1.525702 | 4.401877  | -0.236600 |
| 45 | 1 | 0 | -1.413042 | 2.980619  | -1.874283 |
| 46 | 1 | 0 | -1.425421 | 5.680370  | 1.498701  |
| 47 | 1 | 0 | -2.424656 | 4.880044  | -0.615257 |
| 48 | 7 | 0 | 1.974887  | 2.546846  | 1.014724  |
| 49 | 7 | 0 | 1.004542  | 1.690823  | -0.865023 |
| 50 | 1 | 0 | 4.421743  | 1.807965  | 1.362780  |

-----

SCF Done: E(RB3LYP) = -1319.75782531 A.U. after 2 cycles  
Zero-point correction= 0.392566  
(Hartree/Particle)  
Thermal correction to Energy= 0.417820  
Thermal correction to Enthalpy= 0.418765  
Thermal correction to Gibbs Free Energy= 0.331364

Sum of electronic and zero-point Energies= -1319.365260  
 Sum of electronic and thermal Energies= -1319.340005  
 Sum of electronic and thermal Enthalpies= -1319.339061  
 Sum of electronic and thermal Free Energies= -1319.426462  
 SCF Done: E(RB3PW91) = -1321.25755221 A.U. after 15 cycles

TS4

Standard orientation:

| -----  |        |        |                         |           |           |  |
|--------|--------|--------|-------------------------|-----------|-----------|--|
| Center | Atomic | Atomic | Coordinates (Angstroms) |           |           |  |
| Number | Number | Type   | X                       | Y         | Z         |  |
| -----  |        |        |                         |           |           |  |
| 1      | 6      | 0      | 0.593237                | 2.093141  | 0.107430  |  |
| 2      | 6      | 0      | -0.651182               | 2.002415  | -0.073225 |  |
| 3      | 28     | 0      | 0.115159                | 0.203721  | 0.032097  |  |
| 4      | 1      | 0      | 0.281141                | -0.716205 | -1.143384 |  |
| 5      | 6      | 0      | -2.438555               | -3.882011 | -0.146666 |  |
| 6      | 6      | 0      | -3.826544               | -3.879777 | -0.020547 |  |
| 7      | 6      | 0      | -1.685745               | -2.744951 | 0.203623  |  |
| 8      | 6      | 0      | -4.491366               | -2.744989 | 0.459961  |  |
| 9      | 6      | 0      | -2.362493               | -1.615766 | 0.692786  |  |
| 10     | 6      | 0      | -3.753492               | -1.613590 | 0.817400  |  |
| 11     | 1      | 0      | -4.392500               | -4.764817 | -0.299920 |  |
| 12     | 1      | 0      | -5.573803               | -2.745350 | 0.559008  |  |
| 13     | 1      | 0      | -4.256150               | -0.730548 | 1.202616  |  |
| 14     | 1      | 0      | -1.799936               | -0.738560 | 1.010054  |  |
| 15     | 6      | 0      | 1.924836                | 2.649244  | 0.154792  |  |
| 16     | 6      | 0      | 2.287353                | 3.672128  | -0.746030 |  |
| 17     | 6      | 0      | 2.868949                | 2.199902  | 1.098205  |  |
| 18     | 6      | 0      | 3.563828                | 4.230950  | -0.696020 |  |
| 19     | 1      | 0      | 1.563853                | 4.017227  | -1.478864 |  |
| 20     | 6      | 0      | 4.143593                | 2.765081  | 1.142374  |  |
| 21     | 1      | 0      | 2.593671                | 1.415283  | 1.797086  |  |
| 22     | 6      | 0      | 4.495035                | 3.780053  | 0.246539  |  |
| 23     | 1      | 0      | 3.832717                | 5.018725  | -1.394760 |  |
| 24     | 1      | 0      | 4.862446                | 2.412626  | 1.877149  |  |

|    |   |   |           |           |           |
|----|---|---|-----------|-----------|-----------|
| 25 | 1 | 0 | 5.489123  | 4.217619  | 0.281956  |
| 26 | 6 | 0 | -2.015053 | 2.474075  | -0.170381 |
| 27 | 6 | 0 | -2.965245 | 1.803817  | -0.962544 |
| 28 | 6 | 0 | -2.399531 | 3.641568  | 0.521294  |
| 29 | 6 | 0 | -4.267281 | 2.294493  | -1.066827 |
| 30 | 1 | 0 | -2.673727 | 0.904470  | -1.496231 |
| 31 | 6 | 0 | -3.703719 | 4.123336  | 0.416150  |
| 32 | 1 | 0 | -1.670628 | 4.159784  | 1.137821  |
| 33 | 6 | 0 | -4.641119 | 3.452898  | -0.378237 |
| 34 | 1 | 0 | -4.990305 | 1.770637  | -1.686374 |
| 35 | 1 | 0 | -3.988885 | 5.023507  | 0.954396  |
| 36 | 1 | 0 | -5.656502 | 3.831753  | -0.459258 |
| 37 | 6 | 0 | -0.222142 | -2.788611 | 0.069036  |
| 38 | 6 | 0 | 1.789388  | -3.539896 | -0.090401 |
| 39 | 6 | 0 | 1.879263  | -2.130942 | -0.183966 |
| 40 | 6 | 0 | 2.944928  | -4.330743 | -0.162614 |
| 41 | 6 | 0 | 3.101350  | -1.480689 | -0.378037 |
| 42 | 6 | 0 | 4.166331  | -3.685922 | -0.349959 |
| 43 | 1 | 0 | 2.879219  | -5.412078 | -0.078685 |
| 44 | 6 | 0 | 4.242329  | -2.280759 | -0.461391 |
| 45 | 1 | 0 | 3.167144  | -0.399428 | -0.460060 |
| 46 | 1 | 0 | 5.079046  | -4.272819 | -0.414079 |
| 47 | 1 | 0 | 5.210325  | -1.810129 | -0.613099 |
| 48 | 7 | 0 | 0.467011  | -3.916367 | 0.064956  |
| 49 | 7 | 0 | 0.572386  | -1.642754 | -0.055292 |
| 50 | 1 | 0 | -1.918215 | -4.758749 | -0.518209 |

-----

SCF Done: E(RB3LYP) = -1319.72655622 A.U. after 2 cycles  
Zero-point correction= 0.386119  
(Hartree/Particle)  
Thermal correction to Energy= 0.411278  
Thermal correction to Enthalpy= 0.412222  
Thermal correction to Gibbs Free Energy= 0.326188  
Sum of electronic and zero-point Energies= -1319.340437  
Sum of electronic and thermal Energies= -1319.315279  
Sum of electronic and thermal Enthalpies= -1319.314334

Sum of electronic and thermal Free Energies= -1319.400368  
 SCF Done: E(RB3PW91) = -1321.23246617 A.U. after 16 cycles

Int7

Standard orientation:

| Center<br>Number | Atomic<br>Number | Atomic<br>Type | Coordinates (Angstroms) |           |           |
|------------------|------------------|----------------|-------------------------|-----------|-----------|
|                  |                  |                | X                       | Y         | Z         |
| 1                | 6                | 0              | -1.968908               | 0.560445  | -0.606015 |
| 2                | 6                | 0              | -1.800740               | -0.673130 | -0.727736 |
| 3                | 28               | 0              | 0.014525                | 0.162247  | -0.441357 |
| 4                | 1                | 0              | 0.256787                | 0.144872  | -1.851119 |
| 5                | 6                | 0              | 1.890828                | -1.016094 | 3.290106  |
| 6                | 6                | 0              | 1.021088                | -1.277668 | 4.348006  |
| 7                | 6                | 0              | 1.495736                | -0.172698 | 2.237216  |
| 8                | 6                | 0              | -0.259935               | -0.709628 | 4.374893  |
| 9                | 6                | 0              | 0.219340                | 0.418216  | 2.289948  |
| 10               | 6                | 0              | -0.658282               | 0.142333  | 3.343049  |
| 11               | 1                | 0              | 1.338377                | -1.935576 | 5.153109  |
| 12               | 1                | 0              | -0.934831               | -0.921732 | 5.199793  |
| 13               | 1                | 0              | -1.637359               | 0.613490  | 3.366759  |
| 14               | 1                | 0              | -0.058627               | 1.181428  | 1.558256  |
| 15               | 6                | 0              | -2.542028               | 1.874198  | -0.484703 |
| 16               | 6                | 0              | -1.802749               | 3.037919  | -0.774074 |
| 17               | 6                | 0              | -3.886317               | 1.995911  | -0.071346 |
| 18               | 6                | 0              | -2.398914               | 4.292954  | -0.656731 |
| 19               | 1                | 0              | -0.769247               | 2.952419  | -1.096098 |
| 20               | 6                | 0              | -4.472195               | 3.255265  | 0.041615  |
| 21               | 1                | 0              | -4.458833               | 1.101959  | 0.158409  |
| 22               | 6                | 0              | -3.731884               | 4.406810  | -0.249016 |
| 23               | 1                | 0              | -1.820135               | 5.183604  | -0.885110 |
| 24               | 1                | 0              | -5.508135               | 3.337837  | 0.359178  |
| 25               | 1                | 0              | -4.191993               | 5.386920  | -0.158264 |
| 26               | 6                | 0              | -2.049595               | -2.072276 | -0.958422 |
| 27               | 6                | 0              | -1.005860               | -2.988379 | -1.186423 |



|    |   |   |           |           |           |
|----|---|---|-----------|-----------|-----------|
| 28 | 6 | 0 | -3.384236 | -2.530814 | -0.963790 |
| 29 | 6 | 0 | -1.292860 | -4.333638 | -1.415055 |
| 30 | 1 | 0 | 0.022739  | -2.641442 | -1.185894 |
| 31 | 6 | 0 | -3.660208 | -3.877855 | -1.189893 |
| 32 | 1 | 0 | -4.193298 | -1.827135 | -0.791028 |
| 33 | 6 | 0 | -2.617182 | -4.783070 | -1.416559 |
| 34 | 1 | 0 | -0.479253 | -5.031672 | -1.591604 |
| 35 | 1 | 0 | -4.691251 | -4.221139 | -1.191279 |
| 36 | 1 | 0 | -2.836187 | -5.832647 | -1.592918 |
| 37 | 6 | 0 | 2.376705  | 0.059806  | 1.084355  |
| 38 | 6 | 0 | 4.088920  | 0.290283  | -0.174398 |
| 39 | 6 | 0 | 2.937845  | 0.469376  | -0.991020 |
| 40 | 6 | 0 | 5.376169  | 0.394279  | -0.724892 |
| 41 | 6 | 0 | 3.054468  | 0.740446  | -2.360976 |
| 42 | 6 | 0 | 5.486711  | 0.669317  | -2.085711 |
| 43 | 1 | 0 | 6.255035  | 0.260716  | -0.099277 |
| 44 | 6 | 0 | 4.338914  | 0.839302  | -2.893581 |
| 45 | 1 | 0 | 2.175901  | 0.870886  | -2.987802 |
| 46 | 1 | 0 | 6.471266  | 0.753913  | -2.539272 |
| 47 | 1 | 0 | 4.461373  | 1.050410  | -3.953152 |
| 48 | 7 | 0 | 3.701917  | 0.025776  | 1.126782  |
| 49 | 7 | 0 | 1.838703  | 0.321022  | -0.161736 |
| 50 | 1 | 0 | 2.877627  | -1.467262 | 3.256917  |

-----  
SCF Done: E(RB3LYP) = -1319.74745542 A.U. after 2 cycles

Zero-point correction= 0.387976

(Hartree/Particle)

Thermal correction to Energy= 0.413396

Thermal correction to Enthalpy= 0.414341

Thermal correction to Gibbs Free Energy= 0.327871

Sum of electronic and zero-point Energies= -1319.359480

Sum of electronic and thermal Energies= -1319.334059

Sum of electronic and thermal Enthalpies= -1319.333115

Sum of electronic and thermal Free Energies= -1319.419585

SCF Done: E(RB3PW91) = -1321.25360949 A.U. after 16 cycles

TS5

Standard orientation:

| Center<br>Number | Atomic<br>Number | Atomic<br>Type | Coordinates (Angstroms) |           |           |
|------------------|------------------|----------------|-------------------------|-----------|-----------|
|                  |                  |                | X                       | Y         | Z         |
| 1                | 6                | 0              | 1.838351                | 0.437544  | -0.476337 |
| 2                | 6                | 0              | 1.241322                | 1.471216  | -0.053876 |
| 3                | 28               | 0              | -0.091421               | -0.019509 | -0.378871 |
| 4                | 1                | 0              | -0.381728               | 1.385503  | -0.604997 |
| 5                | 6                | 0              | -1.406308               | -3.233848 | 2.004363  |
| 6                | 6                | 0              | -0.332210               | -3.948007 | 2.533386  |
| 7                | 6                | 0              | -1.228294               | -2.432327 | 0.865208  |
| 8                | 6                | 0              | 0.939005                | -3.872841 | 1.945134  |
| 9                | 6                | 0              | 0.046017                | -2.390395 | 0.259529  |
| 10               | 6                | 0              | 1.127056                | -3.094509 | 0.802816  |
| 11               | 1                | 0              | -0.480943               | -4.561050 | 3.418676  |
| 12               | 1                | 0              | 1.770519                | -4.429449 | 2.368475  |
| 13               | 1                | 0              | 2.097060                | -3.055697 | 0.316437  |
| 14               | 1                | 0              | 0.152348                | -1.970765 | -0.755296 |
| 15               | 6                | 0              | 2.967955                | -0.394103 | -0.818624 |
| 16               | 6                | 0              | 2.952189                | -1.203127 | -1.971640 |
| 17               | 6                | 0              | 4.113468                | -0.396191 | 0.004246  |
| 18               | 6                | 0              | 4.059273                | -1.986696 | -2.297496 |
| 19               | 1                | 0              | 2.075346                | -1.204408 | -2.613059 |
| 20               | 6                | 0              | 5.213846                | -1.186716 | -0.326009 |
| 21               | 1                | 0              | 4.128339                | 0.215447  | 0.901580  |
| 22               | 6                | 0              | 5.191666                | -1.983149 | -1.476344 |
| 23               | 1                | 0              | 4.036603                | -2.601457 | -3.193200 |
| 24               | 1                | 0              | 6.089916                | -1.181327 | 0.317055  |
| 25               | 1                | 0              | 6.051279                | -2.597167 | -1.730710 |
| 26               | 6                | 0              | 1.227108                | 2.831716  | 0.450259  |
| 27               | 6                | 0              | 0.049294                | 3.473375  | 0.868337  |
| 28               | 6                | 0              | 2.454228                | 3.521685  | 0.536184  |
| 29               | 6                | 0              | 0.095414                | 4.779531  | 1.357063  |
| 30               | 1                | 0              | -0.898490               | 2.945132  | 0.816488  |

|    |   |   |           |           |           |
|----|---|---|-----------|-----------|-----------|
| 31 | 6 | 0 | 2.491981  | 4.826142  | 1.024416  |
| 32 | 1 | 0 | 3.368255  | 3.033198  | 0.211181  |
| 33 | 6 | 0 | 1.313873  | 5.459829  | 1.437118  |
| 34 | 1 | 0 | -0.822857 | 5.263654  | 1.677807  |
| 35 | 1 | 0 | 3.442458  | 5.349940  | 1.081003  |
| 36 | 1 | 0 | 1.346974  | 6.476857  | 1.818176  |
| 37 | 6 | 0 | -2.291320 | -1.581284 | 0.331075  |
| 38 | 6 | 0 | -4.150150 | -0.686304 | -0.199437 |
| 39 | 6 | 0 | -3.110905 | 0.137631  | -0.724608 |
| 40 | 6 | 0 | -5.497184 | -0.344817 | -0.405198 |
| 41 | 6 | 0 | -3.400383 | 1.305220  | -1.445399 |
| 42 | 6 | 0 | -5.777769 | 0.814743  | -1.123181 |
| 43 | 1 | 0 | -6.291426 | -0.973270 | -0.010333 |
| 44 | 6 | 0 | -4.741654 | 1.630620  | -1.636186 |
| 45 | 1 | 0 | -2.607061 | 1.931328  | -1.846971 |
| 46 | 1 | 0 | -6.812057 | 1.103079  | -1.294831 |
| 47 | 1 | 0 | -4.999255 | 2.528539  | -2.192749 |
| 48 | 7 | 0 | -3.600434 | -1.763701 | 0.469286  |
| 49 | 7 | 0 | -1.918969 | -0.460856 | -0.374698 |
| 50 | 1 | 0 | -2.384863 | -3.269554 | 2.472752  |

-----

SCF Done: E(RB3LYP) = -1319.73827565 A.U. after 2 cycles  
Zero-point correction= 0.387175  
(Hartree/Particle)  
Thermal correction to Energy= 0.411806  
Thermal correction to Enthalpy= 0.412750  
Thermal correction to Gibbs Free Energy= 0.329358  
Sum of electronic and zero-point Energies= -1319.351101  
Sum of electronic and thermal Energies= -1319.326470  
Sum of electronic and thermal Enthalpies= -1319.325525  
Sum of electronic and thermal Free Energies= -1319.408917  
SCF Done: E(RB3PW91) = -1321.24792403 A.U. after 11 cycles

Int8

Standard orientation:

-----

| Center<br>Number | Atomic<br>Number | Atomic<br>Type | Coordinates (Angstroms) |           |           |
|------------------|------------------|----------------|-------------------------|-----------|-----------|
|                  |                  |                | X                       | Y         | Z         |
| 1                | 6                | 0              | -1.755176               | 0.232877  | 0.696609  |
| 2                | 6                | 0              | -1.048782               | 1.389703  | 1.058597  |
| 3                | 28               | 0              | -0.083257               | -0.335619 | 0.733592  |
| 4                | 1                | 0              | -0.821625               | 1.504586  | 2.125173  |
| 5                | 6                | 0              | 1.469852                | -3.851064 | -1.036872 |
| 6                | 6                | 0              | 0.547807                | -4.895449 | -1.076033 |
| 7                | 6                | 0              | 1.352845                | -2.833686 | -0.073036 |
| 8                | 6                | 0              | -0.511579               | -4.949070 | -0.157951 |
| 9                | 6                | 0              | 0.301291                | -2.910651 | 0.864236  |
| 10               | 6                | 0              | -0.630120               | -3.955790 | 0.814978  |
| 11               | 1                | 0              | 0.649041                | -5.672464 | -1.829629 |
| 12               | 1                | 0              | -1.224549               | -5.768594 | -0.193333 |
| 13               | 1                | 0              | -1.422670               | -4.005992 | 1.557312  |
| 14               | 1                | 0              | 0.282791                | -2.228988 | 1.720767  |
| 15               | 6                | 0              | -3.078769               | -0.071950 | 0.254716  |
| 16               | 6                | 0              | -4.115500               | 0.892147  | 0.348723  |
| 17               | 6                | 0              | -3.386193               | -1.355077 | -0.262303 |
| 18               | 6                | 0              | -5.407042               | 0.580462  | -0.060993 |
| 19               | 1                | 0              | -3.885408               | 1.876823  | 0.744133  |
| 20               | 6                | 0              | -4.678302               | -1.657992 | -0.676568 |
| 21               | 1                | 0              | -2.595554               | -2.096123 | -0.330663 |
| 22               | 6                | 0              | -5.689514               | -0.692599 | -0.575235 |
| 23               | 1                | 0              | -6.195711               | 1.323683  | 0.015450  |
| 24               | 1                | 0              | -4.904413               | -2.642493 | -1.076270 |
| 25               | 1                | 0              | -6.699563               | -0.932700 | -0.896678 |
| 26               | 6                | 0              | -0.896605               | 2.628346  | 0.265900  |
| 27               | 6                | 0              | -0.587130               | 3.832083  | 0.926070  |
| 28               | 6                | 0              | -1.063143               | 2.652324  | -1.132179 |
| 29               | 6                | 0              | -0.464170               | 5.027065  | 0.214868  |
| 30               | 1                | 0              | -0.446543               | 3.828785  | 2.004963  |
| 31               | 6                | 0              | -0.941862               | 3.846192  | -1.840857 |
| 32               | 1                | 0              | -1.268707               | 1.727463  | -1.664608 |
| 33               | 6                | 0              | -0.643055               | 5.039312  | -1.171428 |

|    |   |   |           |           |           |
|----|---|---|-----------|-----------|-----------|
| 34 | 1 | 0 | -0.225088 | 5.946423  | 0.743236  |
| 35 | 1 | 0 | -1.067184 | 3.844914  | -2.920519 |
| 36 | 1 | 0 | -0.540636 | 5.967017  | -1.728025 |
| 37 | 6 | 0 | 2.265256  | -1.684156 | -0.058636 |
| 38 | 6 | 0 | 3.938155  | -0.389490 | -0.313171 |
| 39 | 6 | 0 | 2.882464  | 0.371447  | 0.271215  |
| 40 | 6 | 0 | 5.177709  | 0.208980  | -0.589055 |
| 41 | 6 | 0 | 3.046785  | 1.732224  | 0.569397  |
| 42 | 6 | 0 | 5.335074  | 1.560170  | -0.285904 |
| 43 | 1 | 0 | 5.985792  | -0.370639 | -1.028359 |
| 44 | 6 | 0 | 4.281831  | 2.312354  | 0.284055  |
| 45 | 1 | 0 | 2.239254  | 2.316856  | 1.001908  |
| 46 | 1 | 0 | 6.284144  | 2.049542  | -0.491828 |
| 47 | 1 | 0 | 4.439902  | 3.365777  | 0.502994  |
| 48 | 7 | 0 | 3.512958  | -1.688936 | -0.518510 |
| 49 | 7 | 0 | 1.808943  | -0.481064 | 0.433347  |
| 50 | 1 | 0 | 2.281860  | -3.798820 | -1.755313 |

-----  
SCF Done: E(RB3LYP) = -1319.76530499 A.U. after 2 cycles

Zero-point correction= 0.391632

(Hartree/Particle)

Thermal correction to Energy= 0.416433

Thermal correction to Enthalpy= 0.417377

Thermal correction to Gibbs Free Energy= 0.332398

Sum of electronic and zero-point Energies= -1319.373673

Sum of electronic and thermal Energies= -1319.348872

Sum of electronic and thermal Enthalpies= -1319.347928

Sum of electronic and thermal Free Energies= -1319.432907

SCF Done: E(RB3PW91) = -1321.26654207 A.U. after 11 cycles

TS6

Standard orientation:

-----  
Center      Atomic      Atomic      Coordinates (Angstroms)  
Number      Number      Type      X            Y            Z  
-----

|    |    |   |           |           |           |
|----|----|---|-----------|-----------|-----------|
| 1  | 6  | 0 | -1.409549 | -0.136022 | 0.029481  |
| 2  | 6  | 0 | -1.676306 | 0.974853  | 0.767835  |
| 3  | 28 | 0 | 0.481919  | -0.042226 | -0.330678 |
| 4  | 1  | 0 | -0.870705 | 1.324875  | 1.418721  |
| 5  | 6  | 0 | 2.861454  | -2.824447 | 1.535592  |
| 6  | 6  | 0 | 2.135152  | -3.993722 | 1.770655  |
| 7  | 6  | 0 | 2.245501  | -1.701705 | 0.968050  |
| 8  | 6  | 0 | 0.788365  | -4.068576 | 1.408389  |
| 9  | 6  | 0 | 0.857643  | -1.756426 | 0.661148  |
| 10 | 6  | 0 | 0.153315  | -2.953712 | 0.846569  |
| 11 | 1  | 0 | 2.629373  | -4.855258 | 2.211964  |
| 12 | 1  | 0 | 0.224213  | -4.983880 | 1.565698  |
| 13 | 1  | 0 | -0.899320 | -3.017798 | 0.586803  |
| 14 | 1  | 0 | -0.279562 | -0.911571 | 0.731725  |
| 15 | 6  | 0 | -2.334316 | -1.019262 | -0.703048 |
| 16 | 6  | 0 | -3.454913 | -1.578073 | -0.054688 |
| 17 | 6  | 0 | -2.088051 | -1.375613 | -2.042974 |
| 18 | 6  | 0 | -4.306761 | -2.451657 | -0.730697 |
| 19 | 1  | 0 | -3.649590 | -1.323714 | 0.983735  |
| 20 | 6  | 0 | -2.945410 | -2.243545 | -2.720727 |
| 21 | 1  | 0 | -1.223367 | -0.960471 | -2.554835 |
| 22 | 6  | 0 | -4.056860 | -2.785411 | -2.066718 |
| 23 | 1  | 0 | -5.164755 | -2.874122 | -0.214148 |
| 24 | 1  | 0 | -2.743688 | -2.499436 | -3.757504 |
| 25 | 1  | 0 | -4.721492 | -3.465613 | -2.592635 |
| 26 | 6  | 0 | -2.871882 | 1.831027  | 0.822435  |
| 27 | 6  | 0 | -2.973324 | 2.749279  | 1.887284  |
| 28 | 6  | 0 | -3.895349 | 1.815141  | -0.146960 |
| 29 | 6  | 0 | -4.072943 | 3.599879  | 2.001382  |
| 30 | 1  | 0 | -2.182189 | 2.788494  | 2.632709  |
| 31 | 6  | 0 | -4.987838 | 2.673515  | -0.037581 |
| 32 | 1  | 0 | -3.829729 | 1.139767  | -0.992647 |
| 33 | 6  | 0 | -5.085818 | 3.563816  | 1.038656  |
| 34 | 1  | 0 | -4.134758 | 4.293848  | 2.835347  |
| 35 | 1  | 0 | -5.764499 | 2.651853  | -0.797555 |
| 36 | 1  | 0 | -5.940857 | 4.229684  | 1.119697  |

|    |   |   |          |           |           |
|----|---|---|----------|-----------|-----------|
| 37 | 6 | 0 | 3.004976 | -0.538787 | 0.516432  |
| 38 | 6 | 0 | 4.488694 | 0.904975  | 0.027476  |
| 39 | 6 | 0 | 3.285613 | 1.270830  | -0.654204 |
| 40 | 6 | 0 | 5.645144 | 1.690663  | -0.109813 |
| 41 | 6 | 0 | 3.229169 | 2.409779  | -1.471867 |
| 42 | 6 | 0 | 5.581183 | 2.819495  | -0.922901 |
| 43 | 1 | 0 | 6.560881 | 1.417086  | 0.408311  |
| 44 | 6 | 0 | 4.387923 | 3.173966  | -1.595768 |
| 45 | 1 | 0 | 2.316187 | 2.688939  | -1.993273 |
| 46 | 1 | 0 | 6.463095 | 3.443459  | -1.046084 |
| 47 | 1 | 0 | 4.376447 | 4.062559  | -2.222490 |
| 48 | 7 | 0 | 4.280209 | -0.247143 | 0.759781  |
| 49 | 7 | 0 | 2.346394 | 0.319754  | -0.324562 |
| 50 | 1 | 0 | 3.925510 | -2.776188 | 1.748282  |

-----  
SCF Done: E(RB3LYP) = -1319.72530152 A.U. after 2 cycles

Zero-point correction= 0.387851

(Hartree/Particle)

Thermal correction to Energy= 0.411978

Thermal correction to Enthalpy= 0.412922

Thermal correction to Gibbs Free Energy= 0.330977

Sum of electronic and zero-point Energies= -1319.337451

Sum of electronic and thermal Energies= -1319.313323

Sum of electronic and thermal Enthalpies= -1319.312379

Sum of electronic and thermal Free Energies= -1319.394325

SCF Done: E(RB3PW91) = -1321.23549976 A.U. after 11 cycles

Int9

Standard orientation:

-----

| Center<br>Number | Atomic<br>Number | Atomic<br>Type | Coordinates (Angstroms) |           |           |
|------------------|------------------|----------------|-------------------------|-----------|-----------|
|                  |                  |                | X                       | Y         | Z         |
| 1                | 6                | 0              | -1.726988               | -1.638850 | -0.322563 |
| 2                | 6                | 0              | -1.689511               | -1.355452 | 1.040447  |
| 3                | 28               | 0              | 0.038573                | -0.575997 | 0.156929  |

-----

|    |   |   |           |           |           |
|----|---|---|-----------|-----------|-----------|
| 4  | 1 | 0 | -1.362788 | -2.173362 | 1.678656  |
| 5  | 6 | 0 | 3.654589  | -2.523862 | 0.109637  |
| 6  | 6 | 0 | 3.374637  | -3.873486 | 0.343832  |
| 7  | 6 | 0 | 2.607940  | -1.596653 | 0.064043  |
| 8  | 6 | 0 | 2.056282  | -4.292836 | 0.536125  |
| 9  | 6 | 0 | 1.273941  | -2.022836 | 0.248088  |
| 10 | 6 | 0 | 0.999196  | -3.365790 | 0.488831  |
| 11 | 1 | 0 | 4.185539  | -4.596320 | 0.380115  |
| 12 | 1 | 0 | 1.836968  | -5.341431 | 0.723049  |
| 13 | 1 | 0 | -0.012649 | -3.729491 | 0.645741  |
| 14 | 1 | 0 | -1.373382 | -2.629447 | -0.598828 |
| 15 | 6 | 0 | -2.416064 | -0.928352 | -1.432707 |
| 16 | 6 | 0 | -3.736504 | -0.460601 | -1.302632 |
| 17 | 6 | 0 | -1.781676 | -0.819420 | -2.684798 |
| 18 | 6 | 0 | -4.393890 | 0.119876  | -2.388334 |
| 19 | 1 | 0 | -4.253850 | -0.567742 | -0.353621 |
| 20 | 6 | 0 | -2.435137 | -0.224670 | -3.765183 |
| 21 | 1 | 0 | -0.768373 | -1.194283 | -2.804736 |
| 22 | 6 | 0 | -3.742759 | 0.248671  | -3.619816 |
| 23 | 1 | 0 | -5.417112 | 0.467734  | -2.273198 |
| 24 | 1 | 0 | -1.924127 | -0.135763 | -4.719942 |
| 25 | 1 | 0 | -4.254491 | 0.706212  | -4.462245 |
| 26 | 6 | 0 | -2.106883 | -0.160236 | 1.801909  |
| 27 | 6 | 0 | -2.111551 | -0.266733 | 3.210195  |
| 28 | 6 | 0 | -2.421797 | 1.093274  | 1.231049  |
| 29 | 6 | 0 | -2.436054 | 0.822052  | 4.014958  |
| 30 | 1 | 0 | -1.854890 | -1.217905 | 3.670201  |
| 31 | 6 | 0 | -2.728074 | 2.187252  | 2.041986  |
| 32 | 1 | 0 | -2.441032 | 1.219494  | 0.154512  |
| 33 | 6 | 0 | -2.743540 | 2.056974  | 3.433012  |
| 34 | 1 | 0 | -2.439934 | 0.711184  | 5.095787  |
| 35 | 1 | 0 | -2.960798 | 3.143444  | 1.581397  |
| 36 | 1 | 0 | -2.988855 | 2.910448  | 4.058956  |
| 37 | 6 | 0 | 2.743011  | -0.160722 | -0.144194 |
| 38 | 6 | 0 | 3.300191  | 1.869789  | -0.449356 |
| 39 | 6 | 0 | 1.877426  | 1.835588  | -0.310721 |



|    |   |   |          |           |           |
|----|---|---|----------|-----------|-----------|
| 40 | 6 | 0 | 3.957981 | 3.090303  | -0.661199 |
| 41 | 6 | 0 | 1.110122 | 3.005650  | -0.383556 |
| 42 | 6 | 0 | 3.189409 | 4.251745  | -0.731631 |
| 43 | 1 | 0 | 5.039706 | 3.119991  | -0.765662 |
| 44 | 6 | 0 | 1.784264 | 4.209156  | -0.594371 |
| 45 | 1 | 0 | 0.028155 | 2.983894  | -0.277320 |
| 46 | 1 | 0 | 3.677512 | 5.209578  | -0.894486 |
| 47 | 1 | 0 | 1.216171 | 5.134505  | -0.654003 |
| 48 | 7 | 0 | 3.818363 | 0.589025  | -0.338710 |
| 49 | 7 | 0 | 1.547572 | 0.509186  | -0.116055 |
| 50 | 1 | 0 | 4.675273 | -2.179291 | -0.033329 |

-----  
SCF Done: E(RB3LYP) = -1319.78847160 A.U. after 2 cycles

Zero-point correction= 0.393917

(Hartree/Particle)

Thermal correction to Energy= 0.417974

Thermal correction to Enthalpy= 0.418918

Thermal correction to Gibbs Free Energy= 0.337973

Sum of electronic and zero-point Energies= -1319.394554

Sum of electronic and thermal Energies= -1319.370498

Sum of electronic and thermal Enthalpies= -1319.369554

Sum of electronic and thermal Free Energies= -1319.450498

SCF Done: E(RB3PW91) = -1321.29330788 A.U. after 11 cycles

Int10

Standard orientation:

| Center<br>Number | Atomic<br>Number | Atomic<br>Type | Coordinates (Angstroms) |           |           |
|------------------|------------------|----------------|-------------------------|-----------|-----------|
|                  |                  |                | X                       | Y         | Z         |
| 1                | 6                | 0              | 3.214921                | -2.752998 | -2.905985 |
| 2                | 6                | 0              | 2.572977                | -1.605388 | -2.411734 |
| 3                | 6                | 0              | 2.035746                | -1.603478 | -1.124330 |
| 4                | 6                | 0              | 2.154899                | -2.757110 | -0.320749 |
| 5                | 6                | 0              | 2.802207                | -3.899536 | -0.815118 |
| 6                | 6                | 0              | 3.331317                | -3.896003 | -2.107406 |

|    |    |   |           |           |           |
|----|----|---|-----------|-----------|-----------|
| 7  | 1  | 0 | 3.629833  | -2.744797 | -3.911808 |
| 8  | 1  | 0 | 2.505728  | -0.724526 | -3.044114 |
| 9  | 1  | 0 | 2.878122  | -4.778252 | -0.179658 |
| 10 | 1  | 0 | 3.835530  | -4.780176 | -2.490290 |
| 11 | 6  | 0 | 2.584906  | 1.001279  | -0.451392 |
| 12 | 6  | 0 | 1.397456  | 2.020822  | -2.581801 |
| 13 | 6  | 0 | 2.135875  | 3.154362  | -2.991777 |
| 14 | 6  | 0 | 0.263286  | 1.652369  | -3.331595 |
| 15 | 6  | 0 | 1.747989  | 3.889212  | -4.110219 |
| 16 | 1  | 0 | 3.012299  | 3.452558  | -2.423939 |
| 17 | 6  | 0 | -0.118126 | 2.390219  | -4.452859 |
| 18 | 1  | 0 | -0.307966 | 0.781995  | -3.027150 |
| 19 | 6  | 0 | 0.619566  | 3.510649  | -4.847476 |
| 20 | 1  | 0 | 2.328685  | 4.758199  | -4.409309 |
| 21 | 1  | 0 | -0.994248 | 2.087442  | -5.020881 |
| 22 | 1  | 0 | 0.320242  | 4.083367  | -5.721281 |
| 23 | 6  | 0 | 3.763305  | 1.096180  | 0.374154  |
| 24 | 6  | 0 | 4.805202  | 1.971136  | -0.006653 |
| 25 | 6  | 0 | 3.903496  | 0.347006  | 1.557927  |
| 26 | 6  | 0 | 5.948935  | 2.092011  | 0.780000  |
| 27 | 1  | 0 | 4.713054  | 2.545036  | -0.924266 |
| 28 | 6  | 0 | 5.052274  | 0.473368  | 2.339525  |
| 29 | 1  | 0 | 3.108066  | -0.331975 | 1.846801  |
| 30 | 6  | 0 | 6.077075  | 1.344363  | 1.956925  |
| 31 | 1  | 0 | 6.743841  | 2.766794  | 0.472290  |
| 32 | 1  | 0 | 5.146660  | -0.115301 | 3.248187  |
| 33 | 1  | 0 | 6.971498  | 1.438181  | 2.567338  |
| 34 | 6  | 0 | 1.825145  | 1.277769  | -1.424192 |
| 35 | 28 | 0 | 0.994700  | -0.204556 | -0.325163 |
| 36 | 6  | 0 | 1.544370  | -2.660389 | 0.998809  |
| 37 | 6  | 0 | 0.782690  | -2.953289 | 2.961276  |
| 38 | 6  | 0 | 0.440677  | -1.623346 | 2.546790  |
| 39 | 6  | 0 | 0.405474  | -3.422224 | 4.230065  |
| 40 | 6  | 0 | -0.270617 | -0.768826 | 3.406023  |
| 41 | 6  | 0 | -0.304837 | -2.566143 | 5.070242  |
| 42 | 1  | 0 | 0.667193  | -4.430604 | 4.542288  |

|    |   |   |           |           |           |
|----|---|---|-----------|-----------|-----------|
| 43 | 6 | 0 | -0.637059 | -1.254594 | 4.661680  |
| 44 | 1 | 0 | -0.527203 | 0.243927  | 3.110890  |
| 45 | 1 | 0 | -0.606959 | -2.908522 | 6.057548  |
| 46 | 1 | 0 | -1.187911 | -0.609097 | 5.342706  |
| 47 | 7 | 0 | 1.482848  | -3.587992 | 1.956832  |
| 48 | 7 | 0 | 0.949740  | -1.461691 | 1.276628  |
| 49 | 7 | 0 | -0.887278 | -0.900903 | -1.071816 |
| 50 | 6 | 0 | -1.097392 | -1.989424 | -1.818550 |
| 51 | 6 | 0 | -1.959749 | -0.290807 | -0.515879 |
| 52 | 6 | 0 | -2.364347 | -2.522565 | -2.052558 |
| 53 | 1 | 0 | -0.211670 | -2.453097 | -2.240965 |
| 54 | 6 | 0 | -3.254693 | -0.778939 | -0.700698 |
| 55 | 6 | 0 | -1.649640 | 0.914564  | 0.293965  |
| 56 | 6 | 0 | -3.492260 | -1.920795 | -1.482029 |
| 57 | 1 | 0 | -2.442911 | -3.408806 | -2.670481 |
| 58 | 1 | 0 | -4.085293 | -0.276700 | -0.219414 |
| 59 | 6 | 0 | -2.625886 | 1.769565  | 0.810840  |
| 60 | 7 | 0 | -0.333493 | 1.153942  | 0.497442  |
| 61 | 6 | 0 | -2.276865 | 2.900822  | 1.563677  |
| 62 | 1 | 0 | -3.670281 | 1.556950  | 0.618120  |
| 63 | 6 | 0 | 0.018281  | 2.233033  | 1.203638  |
| 64 | 6 | 0 | -0.905810 | 3.118966  | 1.752371  |
| 65 | 1 | 0 | 1.084215  | 2.389113  | 1.335305  |
| 66 | 1 | 0 | -0.536056 | 3.963912  | 2.320282  |
| 67 | 6 | 0 | -3.364522 | 3.827417  | 2.126970  |
| 68 | 6 | 0 | -2.767708 | 5.007358  | 2.918163  |
| 69 | 1 | 0 | -2.125550 | 5.638204  | 2.292187  |
| 70 | 1 | 0 | -3.579016 | 5.638688  | 3.297076  |
| 71 | 1 | 0 | -2.184197 | 4.667921  | 3.781805  |
| 72 | 6 | 0 | -4.282191 | 3.016527  | 3.074767  |
| 73 | 1 | 0 | -5.059169 | 3.670049  | 3.488799  |
| 74 | 1 | 0 | -4.782987 | 2.191201  | 2.556962  |
| 75 | 1 | 0 | -3.711882 | 2.594413  | 3.910096  |
| 76 | 6 | 0 | -4.203763 | 4.397620  | 0.957020  |
| 77 | 1 | 0 | -4.982100 | 5.063526  | 1.348130  |
| 78 | 1 | 0 | -3.577782 | 4.974630  | 0.266387  |

|    |   |   |           |           |           |
|----|---|---|-----------|-----------|-----------|
| 79 | 1 | 0 | -4.700207 | 3.607363  | 0.383374  |
| 80 | 6 | 0 | -4.920765 | -2.452861 | -1.670111 |
| 81 | 6 | 0 | -5.786970 | -1.359654 | -2.342770 |
| 82 | 1 | 0 | -6.811297 | -1.726588 | -2.478540 |
| 83 | 1 | 0 | -5.838261 | -0.446953 | -1.739027 |
| 84 | 1 | 0 | -5.388984 | -1.091394 | -3.328577 |
| 85 | 6 | 0 | -4.958261 | -3.715062 | -2.552901 |
| 86 | 1 | 0 | -4.384638 | -4.539282 | -2.113436 |
| 87 | 1 | 0 | -5.994558 | -4.054697 | -2.658049 |
| 88 | 1 | 0 | -4.571474 | -3.522566 | -3.560609 |
| 89 | 6 | 0 | -5.518078 | -2.806879 | -0.285738 |
| 90 | 1 | 0 | -4.921320 | -3.576907 | 0.216179  |
| 91 | 1 | 0 | -5.568822 | -1.935687 | 0.376346  |
| 92 | 1 | 0 | -6.537708 | -3.191305 | -0.408183 |

-----  
SCF Done: E(RB3LYP) = -2128.50832792 A.U. after 4 cycles

Zero-point correction= 0.755585

(Hartree/Particle)

Thermal correction to Energy= 0.800708

Thermal correction to Enthalpy= 0.801652

Thermal correction to Gibbs Free Energy= 0.673988

Sum of electronic and zero-point Energies= -2127.752743

Sum of electronic and thermal Energies= -2127.707620

Sum of electronic and thermal Enthalpies= -2127.706676

Sum of electronic and thermal Free Energies= -2127.834340

SCF Done: E(RB3PW91) = -2129.90653582 A.U. after 24 cycles

Scheme S1

<sup>t</sup>BuO<sup>-</sup>

Standard orientation:

| Center<br>Number | Atomic<br>Number | Atomic<br>Type | Coordinates (Angstroms) |           |           |
|------------------|------------------|----------------|-------------------------|-----------|-----------|
|                  |                  |                | X                       | Y         | Z         |
| 1                | 6                | 0              | -0.000125               | -0.000009 | 0.140135  |
| 2                | 6                | 0              | 0.490186                | -1.369580 | -0.434321 |

|    |   |   |           |           |           |
|----|---|---|-----------|-----------|-----------|
| 3  | 1 | 0 | 1.505495  | -1.574156 | -0.067535 |
| 4  | 1 | 0 | -0.164051 | -2.172626 | -0.068036 |
| 5  | 1 | 0 | 0.504284  | -1.407887 | -1.537222 |
| 6  | 6 | 0 | -1.430013 | 0.261112  | -0.437189 |
| 7  | 1 | 0 | -2.116188 | -0.515711 | -0.072344 |
| 8  | 1 | 0 | -1.798261 | 1.229678  | -0.071300 |
| 9  | 1 | 0 | -1.467684 | 0.268400  | -1.540157 |
| 10 | 6 | 0 | 0.942330  | 1.108557  | -0.433453 |
| 11 | 1 | 0 | 0.612458  | 2.090798  | -0.068425 |
| 12 | 1 | 0 | 1.964529  | 0.943056  | -0.065686 |
| 13 | 1 | 0 | 0.970171  | 1.138776  | -1.536238 |
| 14 | 8 | 0 | -0.003128 | -0.000101 | 1.501989  |

-----  
SCF Done: E(RB3LYP) = -233.136210459 A.U. after 1 cycles

Zero-point correction= 0.121180

(Hartree/Particle)

Thermal correction to Energy= 0.127494

Thermal correction to Enthalpy= 0.128439

Thermal correction to Gibbs Free Energy= 0.092531

Sum of electronic and zero-point Energies= -233.015031

Sum of electronic and thermal Energies= -233.008716

Sum of electronic and thermal Enthalpies= -233.007772

Sum of electronic and thermal Free Energies= -233.043680

SCF Done: E(RB3PW91) = -233.111838928 A.U. after 14 cycles

<sup>t</sup>BuOH

Standard orientation:

| Center<br>Number | Atomic<br>Number | Atomic<br>Type | Coordinates (Angstroms) |           |           |
|------------------|------------------|----------------|-------------------------|-----------|-----------|
|                  |                  |                | X                       | Y         | Z         |
| 1                | 6                | 0              | 0.006313                | -0.000001 | 0.011156  |
| 2                | 6                | 0              | 1.496874                | -0.000080 | -0.336110 |
| 3                | 1                | 0              | 1.986760                | 0.887852  | 0.078785  |
| 4                | 1                | 0              | 1.986669                | -0.888067 | 0.078773  |
| 5                | 1                | 0              | 1.639805                | -0.000081 | -1.422421 |

|    |   |   |           |           |           |
|----|---|---|-----------|-----------|-----------|
| 6  | 6 | 0 | -0.682703 | -1.265131 | -0.521427 |
| 7  | 1 | 0 | -0.204309 | -2.161831 | -0.112120 |
| 8  | 1 | 0 | -1.743538 | -1.281557 | -0.237895 |
| 9  | 1 | 0 | -0.630163 | -1.312123 | -1.615862 |
| 10 | 6 | 0 | -0.682564 | 1.265204  | -0.521428 |
| 11 | 1 | 0 | -1.743398 | 1.281747  | -0.237901 |
| 12 | 1 | 0 | -0.204072 | 2.161851  | -0.112121 |
| 13 | 1 | 0 | -0.630013 | 1.312189  | -1.615863 |
| 14 | 8 | 0 | -0.039425 | -0.000001 | 1.458231  |
| 15 | 1 | 0 | -0.969866 | 0.000078  | 1.737623  |

-----  
 SCF Done: E(RB3LYP) = -233.686417788 A.U. after 1 cycles

Zero-point correction= 0.135623

(Hartree/Particle)

Thermal correction to Energy= 0.142370

Thermal correction to Enthalpy= 0.143314

Thermal correction to Gibbs Free Energy= 0.106597

Sum of electronic and zero-point Energies= -233.550795

Sum of electronic and thermal Energies= -233.544048

Sum of electronic and thermal Enthalpies= -233.543104

Sum of electronic and thermal Free Energies= -233.579821

SCF Done: E(RB3PW91) = -233.671451408 A.U. after 11 cycles

SM-anion

Standard orientation:

| Center<br>Number | Atomic<br>Number | Atomic<br>Type | Coordinates (Angstroms) |           |           |
|------------------|------------------|----------------|-------------------------|-----------|-----------|
|                  |                  |                | X                       | Y         | Z         |
| 1                | 6                | 0              | 4.518835                | -0.000000 | 0.000000  |
| 2                | 6                | 0              | 3.809511                | 1.207423  | 0.000033  |
| 3                | 6                | 0              | 2.413510                | 1.207905  | 0.000032  |
| 4                | 6                | 0              | 1.689261                | -0.000000 | 0.000009  |
| 5                | 6                | 0              | 2.413510                | -1.207905 | -0.000022 |
| 6                | 6                | 0              | 3.809511                | -1.207423 | -0.000031 |
| 7                | 1                | 0              | 5.606838                | 0.000000  | -0.000002 |

|    |   |   |           |           |           |
|----|---|---|-----------|-----------|-----------|
| 8  | 1 | 0 | 4.347617  | 2.153692  | 0.000057  |
| 9  | 1 | 0 | 1.857862  | 2.140263  | 0.000043  |
| 10 | 1 | 0 | 1.857862  | -2.140264 | -0.000032 |
| 11 | 1 | 0 | 4.347617  | -2.153693 | -0.000058 |
| 12 | 6 | 0 | 0.214937  | 0.000000  | 0.000008  |
| 13 | 6 | 0 | -1.792679 | -0.718886 | -0.000010 |
| 14 | 6 | 0 | -1.792679 | 0.718886  | -0.000001 |
| 15 | 6 | 0 | -3.006297 | -1.431581 | -0.000000 |
| 16 | 6 | 0 | -3.006297 | 1.431581  | 0.000006  |
| 17 | 6 | 0 | -4.199596 | -0.708811 | 0.000009  |
| 18 | 1 | 0 | -3.008317 | -2.520494 | 0.000019  |
| 19 | 6 | 0 | -4.199597 | 0.708811  | 0.000006  |
| 20 | 1 | 0 | -3.008318 | 2.520494  | -0.000020 |
| 21 | 1 | 0 | -5.150437 | -1.239713 | 0.000018  |
| 22 | 1 | 0 | -5.150437 | 1.239713  | 0.000001  |
| 23 | 7 | 0 | -0.495134 | -1.157558 | 0.000057  |
| 24 | 7 | 0 | -0.495134 | 1.157558  | -0.000095 |

-----  
SCF Done: E(RB3LYP) = -610.452441027 A.U. after 2 cycles

Zero-point correction= 0.185441

(Hartree/Particle)

Thermal correction to Energy= 0.195893

Thermal correction to Enthalpy= 0.196838

Thermal correction to Gibbs Free Energy= 0.148437

Sum of electronic and zero-point Energies= -610.267000

Sum of electronic and thermal Energies= -610.256548

Sum of electronic and thermal Enthalpies= -610.255603

Sum of electronic and thermal Free Energies= -610.304004

SCF Done: E(RB3PW91) = -610.360658584 A.U. after 12 cycles

Ni(OAc)<sub>2</sub>

Standard orientation:

-----  
Center Atomic Atomic Coordinates (Angstroms)  
Number Number Type X Y Z  
-----

|    |    |   |           |           |           |
|----|----|---|-----------|-----------|-----------|
| 1  | 8  | 0 | -1.590295 | 1.079659  | -0.015992 |
| 2  | 8  | 0 | -1.589918 | -1.079466 | -0.016026 |
| 3  | 8  | 0 | 1.590199  | -1.079634 | 0.015987  |
| 4  | 8  | 0 | 1.590049  | 1.079515  | 0.015958  |
| 5  | 28 | 0 | -0.000009 | 0.000053  | -0.000073 |
| 6  | 6  | 0 | -2.280389 | -0.000016 | -0.016635 |
| 7  | 6  | 0 | 2.280383  | -0.000008 | 0.016692  |
| 8  | 6  | 0 | -3.773709 | -0.000272 | 0.010879  |
| 9  | 1  | 0 | -4.107824 | 0.003960  | 1.055701  |
| 10 | 1  | 0 | -4.161729 | 0.896857  | -0.477317 |
| 11 | 1  | 0 | -4.161393 | -0.901261 | -0.470349 |
| 12 | 6  | 0 | 3.773709  | 0.000068  | -0.010642 |
| 13 | 1  | 0 | 4.161559  | -0.897166 | 0.477495  |
| 14 | 1  | 0 | 4.107947  | -0.004058 | -1.055423 |
| 15 | 1  | 0 | 4.161442  | 0.900951  | 0.470750  |

-----  
SCF Done: E(RB3LYP) = -626.366317115 A.U. after 1 cycles

Zero-point correction= 0.103704

(Hartree/Particle)

Thermal correction to Energy= 0.114288

Thermal correction to Enthalpy= 0.115232

Thermal correction to Gibbs Free Energy= 0.065672

Sum of electronic and zero-point Energies= -626.262614

Sum of electronic and thermal Energies= -626.252029

Sum of electronic and thermal Enthalpies= -626.251085

Sum of electronic and thermal Free Energies= -626.300645

SCF Done: E(RB3PW91) = -628.000795156 A.U. after 15 cycles

ligand

Standard orientation:

| Center<br>Number | Atomic<br>Number | Atomic<br>Type | Coordinates (Angstroms) |          |          |
|------------------|------------------|----------------|-------------------------|----------|----------|
|                  |                  |                | X                       | Y        | Z        |
| 1                | 6                | 0              | 2.559438                | 2.330146 | 0.958074 |
| 2                | 6                | 0              | 3.412764                | 1.254656 | 0.691429 |



|    |   |   |           |           |           |
|----|---|---|-----------|-----------|-----------|
| 3  | 6 | 0 | 2.894952  | 0.090878  | 0.110450  |
| 4  | 6 | 0 | 1.516344  | 0.098793  | -0.156846 |
| 5  | 6 | 0 | 0.733883  | 1.220452  | 0.144661  |
| 6  | 7 | 0 | 1.250389  | 2.334951  | 0.696272  |
| 7  | 1 | 0 | 2.957609  | 3.237473  | 1.410224  |
| 8  | 1 | 0 | 4.464205  | 1.348240  | 0.938493  |
| 9  | 1 | 0 | 1.043557  | -0.758233 | -0.626300 |
| 10 | 6 | 0 | -0.733914 | 1.220464  | -0.144625 |
| 11 | 6 | 0 | -1.516387 | 0.098803  | 0.156851  |
| 12 | 7 | 0 | -1.250401 | 2.334965  | -0.696243 |
| 13 | 6 | 0 | -2.894987 | 0.090899  | -0.110463 |
| 14 | 1 | 0 | -1.043613 | -0.758239 | 0.626296  |
| 15 | 6 | 0 | -2.559440 | 2.330159  | -0.958100 |
| 16 | 6 | 0 | -3.412776 | 1.254672  | -0.691485 |
| 17 | 1 | 0 | -2.957594 | 3.237490  | -1.410258 |
| 18 | 1 | 0 | -4.464198 | 1.348253  | -0.938614 |
| 19 | 6 | 0 | 3.753341  | -1.134097 | -0.244034 |
| 20 | 6 | 0 | 5.229360  | -0.946525 | 0.157223  |
| 21 | 1 | 0 | 5.797517  | -1.845430 | -0.108323 |
| 22 | 1 | 0 | 5.690849  | -0.099577 | -0.363922 |
| 23 | 1 | 0 | 5.343847  | -0.790871 | 1.236578  |
| 24 | 6 | 0 | 3.203613  | -2.379446 | 0.493195  |
| 25 | 1 | 0 | 2.167943  | -2.598090 | 0.211385  |
| 26 | 1 | 0 | 3.808976  | -3.259988 | 0.245494  |
| 27 | 1 | 0 | 3.235342  | -2.239952 | 1.580324  |
| 28 | 6 | 0 | 3.690238  | -1.372816 | -1.772715 |
| 29 | 1 | 0 | 4.077116  | -0.506376 | -2.321978 |
| 30 | 1 | 0 | 4.297320  | -2.245853 | -2.042250 |
| 31 | 1 | 0 | 2.666490  | -1.558260 | -2.115394 |
| 32 | 6 | 0 | -3.753349 | -1.134098 | 0.244017  |
| 33 | 6 | 0 | -3.690665 | -1.372405 | 1.772782  |
| 34 | 1 | 0 | -4.297611 | -2.245524 | 2.042356  |
| 35 | 1 | 0 | -2.666971 | -1.557497 | 2.115816  |
| 36 | 1 | 0 | -4.077927 | -0.505917 | 2.321696  |
| 37 | 6 | 0 | -3.203176 | -2.379548 | -0.492687 |
| 38 | 1 | 0 | -3.808391 | -3.260148 | -0.244835 |

|    |   |   |           |           |           |
|----|---|---|-----------|-----------|-----------|
| 39 | 1 | 0 | -3.234699 | -2.240410 | -1.579868 |
| 40 | 1 | 0 | -2.167516 | -2.597870 | -0.210580 |
| 41 | 6 | 0 | -5.229281 | -0.946886 | -0.157762 |
| 42 | 1 | 0 | -5.691114 | -0.099924 | 0.363054  |
| 43 | 1 | 0 | -5.343449 | -0.791481 | -1.237187 |
| 44 | 1 | 0 | -5.797357 | -1.845841 | 0.107788  |

-----  
SCF Done: E(RB3LYP) = -809.920035806 A.U. after 1 cycles

Zero-point correction= 0.382981

(Hartree/Particle)

Thermal correction to Energy= 0.402879

Thermal correction to Enthalpy= 0.403823

Thermal correction to Gibbs Free Energy= 0.334045

Sum of electronic and zero-point Energies= -809.537055

Sum of electronic and thermal Energies= -809.517157

Sum of electronic and thermal Enthalpies= -809.516213

Sum of electronic and thermal Free Energies= -809.585991

SCF Done: E(RB3PW91) = -809.814485830 A.U. after 12 cycles

OAc<sup>-</sup>

Standard orientation:

| Center<br>Number | Atomic<br>Number | Atomic<br>Type | Coordinates (Angstroms) |           |           |
|------------------|------------------|----------------|-------------------------|-----------|-----------|
|                  |                  |                | X                       | Y         | Z         |
| 1                | 6                | 0              | 0.197378                | 0.000135  | -0.001163 |
| 2                | 8                | 0              | 0.817547                | -1.101383 | 0.000273  |
| 3                | 8                | 0              | 0.701026                | 1.161117  | 0.000158  |
| 4                | 6                | 0              | -1.353181               | -0.055841 | -0.000403 |
| 5                | 1                | 0              | -1.738008               | 0.434347  | 0.903559  |
| 6                | 1                | 0              | -1.745080               | 0.505353  | -0.858609 |
| 7                | 1                | 0              | -1.730684               | -1.083333 | -0.038997 |

-----  
SCF Done: E(RB3LYP) = -228.598681617 A.U. after 1 cycles

Zero-point correction= 0.048238

(Hartree/Particle)

Thermal correction to Energy= 0.051805  
 Thermal correction to Enthalpy= 0.052749  
 Thermal correction to Gibbs Free Energy= 0.022342  
 Sum of electronic and zero-point Energies= -228.550444  
 Sum of electronic and thermal Energies= -228.546876  
 Sum of electronic and thermal Enthalpies= -228.545932  
 Sum of electronic and thermal Free Energies= -228.576340  
 SCF Done: E(RB3PW91) = -228.572710861 A.U. after 10 cycles

Int11

Standard orientation:

| Center<br>Number | Atomic<br>Number | Atomic<br>Type | Coordinates (Angstroms) |           |           |
|------------------|------------------|----------------|-------------------------|-----------|-----------|
|                  |                  |                | X                       | Y         | Z         |
| 1                | 6                | 0              | -3.795210               | 0.109577  | 0.430613  |
| 2                | 6                | 0              | -3.685978               | -1.143475 | -0.209147 |
| 3                | 6                | 0              | -4.501505               | -1.459712 | -1.305624 |
| 4                | 6                | 0              | -5.456874               | -0.545957 | -1.743820 |
| 5                | 6                | 0              | -4.770061               | 1.019779  | -0.013332 |
| 6                | 6                | 0              | -5.594998               | 0.687783  | -1.085289 |
| 7                | 1                | 0              | -4.403304               | -2.428673 | -1.785820 |
| 8                | 1                | 0              | -6.102869               | -0.790356 | -2.582624 |
| 9                | 1                | 0              | -4.854609               | 1.982401  | 0.481497  |
| 10               | 1                | 0              | -6.346512               | 1.397047  | -1.423372 |
| 11               | 1                | 0              | -3.116815               | -1.959901 | 0.265869  |
| 12               | 28               | 0              | -1.298538               | -1.207796 | -0.142818 |
| 13               | 8                | 0              | -1.207695               | -2.217180 | -1.731190 |
| 14               | 6                | 0              | -1.403191               | -3.495995 | -1.582454 |
| 15               | 8                | 0              | -1.635444               | -4.039451 | -0.489752 |
| 16               | 6                | 0              | -1.298148               | -4.305161 | -2.865832 |
| 17               | 1                | 0              | -0.241813               | -4.533581 | -3.056464 |
| 18               | 1                | 0              | -1.840805               | -5.248049 | -2.763512 |
| 19               | 1                | 0              | -1.674918               | -3.739509 | -3.722877 |
| 20               | 6                | 0              | -1.001805               | 1.843195  | -1.688995 |
| 21               | 6                | 0              | -0.330637               | 3.055132  | -1.866147 |

|    |   |   |           |           |           |
|----|---|---|-----------|-----------|-----------|
| 22 | 6 | 0 | 1.019458  | 3.157545  | -1.509934 |
| 23 | 6 | 0 | 1.618010  | 1.992128  | -1.004293 |
| 24 | 6 | 0 | 0.881570  | 0.810453  | -0.875835 |
| 25 | 7 | 0 | -0.420594 | 0.744858  | -1.206597 |
| 26 | 1 | 0 | -2.055250 | 1.753877  | -1.944044 |
| 27 | 1 | 0 | -0.878700 | 3.899830  | -2.266477 |
| 28 | 1 | 0 | 2.652966  | 2.016584  | -0.684330 |
| 29 | 6 | 0 | 1.488992  | -0.450063 | -0.354974 |
| 30 | 6 | 0 | 2.870578  | -0.658206 | -0.330104 |
| 31 | 7 | 0 | 0.648350  | -1.413775 | 0.085387  |
| 32 | 6 | 0 | 3.426497  | -1.848732 | 0.161075  |
| 33 | 1 | 0 | 3.519860  | 0.113444  | -0.724670 |
| 34 | 6 | 0 | 1.151195  | -2.566525 | 0.549283  |
| 35 | 6 | 0 | 2.519131  | -2.815522 | 0.613459  |
| 36 | 1 | 0 | 0.426519  | -3.307808 | 0.868429  |
| 37 | 1 | 0 | 2.848446  | -3.768714 | 1.008231  |
| 38 | 6 | 0 | -2.830810 | 0.437911  | 1.476850  |
| 39 | 6 | 0 | -1.789540 | 1.279028  | 3.128868  |
| 40 | 6 | 0 | -0.929340 | 0.308228  | 2.527221  |
| 41 | 6 | 0 | -1.378504 | 1.992045  | 4.267360  |
| 42 | 6 | 0 | 0.341767  | 0.046894  | 3.066068  |
| 43 | 6 | 0 | -0.114037 | 1.731178  | 4.786654  |
| 44 | 1 | 0 | -2.040466 | 2.723295  | 4.724558  |
| 45 | 6 | 0 | 0.733540  | 0.767906  | 4.192082  |
| 46 | 1 | 0 | 0.999290  | -0.700038 | 2.635034  |
| 47 | 1 | 0 | 0.228760  | 2.269036  | 5.667352  |
| 48 | 1 | 0 | 1.711490  | 0.579576  | 4.629215  |
| 49 | 7 | 0 | -1.628198 | -0.227695 | 1.463606  |
| 50 | 7 | 0 | -2.981680 | 1.343395  | 2.438087  |
| 51 | 6 | 0 | 4.948922  | -2.050684 | 0.170179  |
| 52 | 6 | 0 | 5.348948  | -3.413379 | 0.767845  |
| 53 | 1 | 0 | 4.942201  | -4.250662 | 0.188899  |
| 54 | 1 | 0 | 6.440441  | -3.508137 | 0.759266  |
| 55 | 1 | 0 | 5.017565  | -3.518540 | 1.807567  |
| 56 | 6 | 0 | 5.607876  | -0.933001 | 1.015621  |
| 57 | 1 | 0 | 6.695066  | -1.073202 | 1.033082  |

|    |   |   |          |           |           |
|----|---|---|----------|-----------|-----------|
| 58 | 1 | 0 | 5.408350 | 0.064145  | 0.608367  |
| 59 | 1 | 0 | 5.245852 | -0.954371 | 2.050029  |
| 60 | 6 | 0 | 5.477206 | -1.978412 | -1.283993 |
| 61 | 1 | 0 | 6.563834 | -2.124171 | -1.291698 |
| 62 | 1 | 0 | 5.024766 | -2.758287 | -1.907399 |
| 63 | 1 | 0 | 5.267759 | -1.009321 | -1.749876 |
| 64 | 6 | 0 | 1.830961 | 4.456458  | -1.635916 |
| 65 | 6 | 0 | 3.043826 | 4.214125  | -2.567501 |
| 66 | 1 | 0 | 3.631427 | 5.135141  | -2.662846 |
| 67 | 1 | 0 | 3.710029 | 3.434546  | -2.181978 |
| 68 | 1 | 0 | 2.717570 | 3.914028  | -3.570296 |
| 69 | 6 | 0 | 0.993673 | 5.609468  | -2.221832 |
| 70 | 1 | 0 | 0.136407 | 5.858150  | -1.585519 |
| 71 | 1 | 0 | 1.616174 | 6.507742  | -2.300840 |
| 72 | 1 | 0 | 0.622430 | 5.376407  | -3.226843 |
| 73 | 6 | 0 | 2.332591 | 4.880340  | -0.233351 |
| 74 | 1 | 0 | 1.492764 | 5.061886  | 0.446984  |
| 75 | 1 | 0 | 2.974409 | 4.118288  | 0.221823  |
| 76 | 1 | 0 | 2.916082 | 5.805673  | -0.310504 |

-----  
SCF Done: E(RB3LYP) = -1818.13908944 A.U. after 4 cycles

Zero-point correction= 0.625061

(Hartree/Particle)

Thermal correction to Energy= 0.664063

Thermal correction to Enthalpy= 0.665008

Thermal correction to Gibbs Free Energy= 0.550052

Sum of electronic and zero-point Energies= -1817.514029

Sum of electronic and thermal Energies= -1817.475026

Sum of electronic and thermal Enthalpies= -1817.474082

Sum of electronic and thermal Free Energies= -1817.589037

SCF Done: E(RB3PW91) = -1819.59446199 A.U. after 29 cycles

TS7

Standard orientation:

-----  
Center Atomic Atomic Coordinates (Angstroms)

| Number | Number | Type | X         | Y         | Z         |
|--------|--------|------|-----------|-----------|-----------|
| 1      | 6      | 0    | -3.688705 | 0.328855  | 0.463939  |
| 2      | 6      | 0    | -3.287265 | -0.479440 | -0.630272 |
| 3      | 6      | 0    | -3.975591 | -0.317571 | -1.849366 |
| 4      | 6      | 0    | -5.072283 | 0.540986  | -1.955406 |
| 5      | 6      | 0    | -4.799826 | 1.178560  | 0.369132  |
| 6      | 6      | 0    | -5.495195 | 1.272929  | -0.836342 |
| 7      | 1      | 0    | -3.679787 | -0.905089 | -2.716000 |
| 8      | 1      | 0    | -5.604507 | 0.631572  | -2.899383 |
| 9      | 1      | 0    | -5.084244 | 1.781472  | 1.226976  |
| 10     | 1      | 0    | -6.356856 | 1.931904  | -0.913333 |
| 11     | 1      | 0    | -3.130637 | -1.871623 | -0.528000 |
| 12     | 28     | 0    | -1.330893 | -1.005315 | -0.375075 |
| 13     | 8      | 0    | -1.339903 | -2.278953 | -1.886924 |
| 14     | 6      | 0    | -2.223088 | -3.180114 | -1.758589 |
| 15     | 8      | 0    | -3.159898 | -3.103793 | -0.886864 |
| 16     | 6      | 0    | -2.197735 | -4.383939 | -2.666606 |
| 17     | 1      | 0    | -1.308477 | -4.375022 | -3.298888 |
| 18     | 1      | 0    | -2.224022 | -5.298951 | -2.066133 |
| 19     | 1      | 0    | -3.095812 | -4.381009 | -3.294430 |
| 20     | 6      | 0    | -0.703724 | 2.080669  | -1.841607 |
| 21     | 6      | 0    | 0.004326  | 3.282626  | -1.759515 |
| 22     | 6      | 0    | 1.297526  | 3.292055  | -1.222557 |
| 23     | 6      | 0    | 1.806735  | 2.049170  | -0.810708 |
| 24     | 6      | 0    | 1.038371  | 0.889593  | -0.944871 |
| 25     | 7      | 0    | -0.210153 | 0.906198  | -1.447685 |
| 26     | 1      | 0    | -1.717366 | 2.063061  | -2.236335 |
| 27     | 1      | 0    | -0.473941 | 4.192275  | -2.103255 |
| 28     | 1      | 0    | 2.789667  | 1.990076  | -0.356154 |
| 29     | 6      | 0    | 1.538670  | -0.448772 | -0.527380 |
| 30     | 6      | 0    | 2.900407  | -0.758817 | -0.495095 |
| 31     | 7      | 0    | 0.609892  | -1.377836 | -0.198315 |
| 32     | 6      | 0    | 3.354696  | -2.031686 | -0.119275 |
| 33     | 1      | 0    | 3.610695  | 0.002556  | -0.795428 |
| 34     | 6      | 0    | 1.023049  | -2.601853 | 0.157581  |

|    |   |   |           |           |           |
|----|---|---|-----------|-----------|-----------|
| 35 | 6 | 0 | 2.364990  | -2.965748 | 0.214507  |
| 36 | 1 | 0 | 0.245546  | -3.312176 | 0.418723  |
| 37 | 1 | 0 | 2.611412  | -3.975601 | 0.518553  |
| 38 | 6 | 0 | -2.785032 | 0.316542  | 1.603091  |
| 39 | 6 | 0 | -1.761378 | 0.612340  | 3.441692  |
| 40 | 6 | 0 | -0.870525 | -0.080431 | 2.558696  |
| 41 | 6 | 0 | -1.362666 | 0.943846  | 4.747236  |
| 42 | 6 | 0 | 0.419251  | -0.436866 | 2.988952  |
| 43 | 6 | 0 | -0.081802 | 0.586989  | 5.158882  |
| 44 | 1 | 0 | -2.047364 | 1.466761  | 5.410566  |
| 45 | 6 | 0 | 0.796580  | -0.095740 | 4.286986  |
| 46 | 1 | 0 | 1.110576  | -0.964633 | 2.342161  |
| 47 | 1 | 0 | 0.250971  | 0.833197  | 6.164523  |
| 48 | 1 | 0 | 1.790735  | -0.364080 | 4.637780  |
| 49 | 7 | 0 | -1.561581 | -0.261388 | 1.376626  |
| 50 | 7 | 0 | -2.960483 | 0.853940  | 2.807695  |
| 51 | 6 | 0 | 4.857011  | -2.347708 | -0.097762 |
| 52 | 6 | 0 | 5.138506  | -3.799088 | 0.336349  |
| 53 | 1 | 0 | 4.688031  | -4.526979 | -0.348621 |
| 54 | 1 | 0 | 6.219848  | -3.975137 | 0.337920  |
| 55 | 1 | 0 | 4.770951  | -4.002592 | 1.348913  |
| 56 | 6 | 0 | 5.561038  | -1.393180 | 0.897974  |
| 57 | 1 | 0 | 6.635860  | -1.608350 | 0.923141  |
| 58 | 1 | 0 | 5.437946  | -0.342000 | 0.615754  |
| 59 | 1 | 0 | 5.165246  | -1.519590 | 1.912304  |
| 60 | 6 | 0 | 5.441226  | -2.137321 | -1.516654 |
| 61 | 1 | 0 | 6.513508  | -2.365927 | -1.513816 |
| 62 | 1 | 0 | 4.954735  | -2.795745 | -2.245720 |
| 63 | 1 | 0 | 5.322156  | -1.104630 | -1.861699 |
| 64 | 6 | 0 | 2.134900  | 4.569565  | -1.055238 |
| 65 | 6 | 0 | 3.468859  | 4.414751  | -1.826117 |
| 66 | 1 | 0 | 4.073510  | 5.322246  | -1.710999 |
| 67 | 1 | 0 | 4.062591  | 3.571771  | -1.455596 |
| 68 | 1 | 0 | 3.290472  | 4.258789  | -2.896697 |
| 69 | 6 | 0 | 1.406921  | 5.816265  | -1.593656 |
| 70 | 1 | 0 | 0.469942  | 6.007667  | -1.057963 |

|    |   |   |          |          |           |
|----|---|---|----------|----------|-----------|
| 71 | 1 | 0 | 2.046175 | 6.696477 | -1.461843 |
| 72 | 1 | 0 | 1.181788 | 5.729213 | -2.663294 |
| 73 | 6 | 0 | 2.431080 | 4.786949 | 0.449197  |
| 74 | 1 | 0 | 1.503451 | 4.902328 | 1.021260  |
| 75 | 1 | 0 | 2.990097 | 3.950382 | 0.882078  |
| 76 | 1 | 0 | 3.030826 | 5.695286 | 0.583896  |

-----  
SCF Done: E(RB3LYP) = -1818.11101568 A.U. after 3 cycles

Zero-point correction= 0.620775

(Hartree/Particle)

Thermal correction to Energy= 0.658739

Thermal correction to Enthalpy= 0.659683

Thermal correction to Gibbs Free Energy= 0.549213

Sum of electronic and zero-point Energies= -1817.490240

Sum of electronic and thermal Energies= -1817.452277

Sum of electronic and thermal Enthalpies= -1817.451332

Sum of electronic and thermal Free Energies= -1817.561803

SCF Done: E(RB3PW91) = -1819.57437024 A.U. after 26 cycles

Int12

Standard orientation:

-----

| Center<br>Number | Atomic<br>Number | Atomic<br>Type | Coordinates (Angstroms) |           |           |
|------------------|------------------|----------------|-------------------------|-----------|-----------|
|                  |                  |                | X                       | Y         | Z         |
| 1                | 6                | 0              | -3.915008               | 0.446573  | 0.300585  |
| 2                | 6                | 0              | -3.161360               | 0.236078  | -0.877714 |
| 3                | 6                | 0              | -3.718815               | 0.644839  | -2.096012 |
| 4                | 6                | 0              | -5.003664               | 1.211674  | -2.144783 |
| 5                | 6                | 0              | -5.198061               | 1.005264  | 0.260599  |
| 6                | 6                | 0              | -5.744421               | 1.382014  | -0.970053 |
| 7                | 1                | 0              | -3.161978               | 0.531437  | -3.024742 |
| 8                | 1                | 0              | -5.422560               | 1.519346  | -3.101004 |
| 9                | 1                | 0              | -5.749253               | 1.154151  | 1.185737  |
| 10               | 1                | 0              | -6.740441               | 1.816735  | -1.011868 |
| 11               | 1                | 0              | -3.088937               | -1.959900 | -1.448634 |

-----



|    |    |   |           |           |           |
|----|----|---|-----------|-----------|-----------|
| 12 | 28 | 0 | -1.397541 | -0.464387 | -0.557851 |
| 13 | 8  | 0 | -1.189560 | -1.166005 | -2.479601 |
| 14 | 6  | 0 | -1.891614 | -2.093224 | -2.897599 |
| 15 | 8  | 0 | -2.938059 | -2.558674 | -2.226488 |
| 16 | 6  | 0 | -1.645241 | -2.785412 | -4.204527 |
| 17 | 1  | 0 | -0.704234 | -2.444669 | -4.636956 |
| 18 | 1  | 0 | -1.626846 | -3.869880 | -4.057361 |
| 19 | 1  | 0 | -2.469328 | -2.562169 | -4.891687 |
| 20 | 6  | 0 | -0.180839 | 2.636081  | -1.232745 |
| 21 | 6  | 0 | 0.739773  | 3.662012  | -1.004649 |
| 22 | 6  | 0 | 2.021622  | 3.352379  | -0.533725 |
| 23 | 6  | 0 | 2.296663  | 1.989313  | -0.333794 |
| 24 | 6  | 0 | 1.324892  | 1.021259  | -0.602758 |
| 25 | 7  | 0 | 0.093528  | 1.345204  | -1.042108 |
| 26 | 1  | 0 | -1.186984 | 2.862131  | -1.578852 |
| 27 | 1  | 0 | 0.433272  | 4.685513  | -1.185862 |
| 28 | 1  | 0 | 3.260266  | 1.685893  | 0.060157  |
| 29 | 6  | 0 | 1.566985  | -0.434414 | -0.399723 |
| 30 | 6  | 0 | 2.851171  | -0.984147 | -0.358616 |
| 31 | 7  | 0 | 0.470309  | -1.216881 | -0.259784 |
| 32 | 6  | 0 | 3.053313  | -2.358542 | -0.161210 |
| 33 | 1  | 0 | 3.702552  | -0.329730 | -0.504881 |
| 34 | 6  | 0 | 0.645739  | -2.530159 | -0.064238 |
| 35 | 6  | 0 | 1.898214  | -3.136128 | -0.006889 |
| 36 | 1  | 0 | -0.258324 | -3.117447 | 0.066375  |
| 37 | 1  | 0 | 1.947179  | -4.205302 | 0.159542  |
| 38 | 6  | 0 | -3.182624 | 0.094757  | 1.509372  |
| 39 | 6  | 0 | -2.430256 | -0.226817 | 3.472044  |
| 40 | 6  | 0 | -1.376997 | -0.537520 | 2.550561  |
| 41 | 6  | 0 | -2.226214 | -0.340138 | 4.855818  |
| 42 | 6  | 0 | -0.118665 | -0.944540 | 3.024118  |
| 43 | 6  | 0 | -0.975431 | -0.752824 | 5.311918  |
| 44 | 1  | 0 | -3.031802 | -0.104132 | 5.547255  |
| 45 | 6  | 0 | 0.065015  | -1.047382 | 4.403909  |
| 46 | 1  | 0 | 0.698209  | -1.167553 | 2.346993  |
| 47 | 1  | 0 | -0.793548 | -0.845379 | 6.380230  |

|    |   |   |           |           |           |
|----|---|---|-----------|-----------|-----------|
| 48 | 1 | 0 | 1.034046  | -1.359338 | 4.787906  |
| 49 | 7 | 0 | -1.896111 | -0.329336 | 1.287403  |
| 50 | 7 | 0 | -3.557824 | 0.171948  | 2.782663  |
| 51 | 6 | 0 | 4.474350  | -2.940054 | -0.129739 |
| 52 | 6 | 0 | 4.473825  | -4.462411 | 0.108466  |
| 53 | 1 | 0 | 3.947790  | -5.002490 | -0.687509 |
| 54 | 1 | 0 | 5.506334  | -4.828270 | 0.126621  |
| 55 | 1 | 0 | 4.014653  | -4.727194 | 1.068083  |
| 56 | 6 | 0 | 5.275414  | -2.266974 | 1.011880  |
| 57 | 1 | 0 | 6.293501  | -2.672868 | 1.041530  |
| 58 | 1 | 0 | 5.353290  | -1.182927 | 0.875882  |
| 59 | 1 | 0 | 4.806783  | -2.452842 | 1.985174  |
| 60 | 6 | 0 | 5.167922  | -2.655700 | -1.485128 |
| 61 | 1 | 0 | 6.184938  | -3.065111 | -1.475653 |
| 62 | 1 | 0 | 4.621502  | -3.121698 | -2.313472 |
| 63 | 1 | 0 | 5.242858  | -1.582624 | -1.691521 |
| 64 | 6 | 0 | 3.088057  | 4.413853  | -0.221406 |
| 65 | 6 | 0 | 4.348344  | 4.143002  | -1.079150 |
| 66 | 1 | 0 | 5.117190  | 4.893756  | -0.860674 |
| 67 | 1 | 0 | 4.779751  | 3.156861  | -0.875107 |
| 68 | 1 | 0 | 4.116151  | 4.195526  | -2.149466 |
| 69 | 6 | 0 | 2.593454  | 5.841507  | -0.523964 |
| 70 | 1 | 0 | 1.719574  | 6.109468  | 0.080988  |
| 71 | 1 | 0 | 3.387861  | 6.559120  | -0.289874 |
| 72 | 1 | 0 | 2.334343  | 5.969919  | -1.581598 |
| 73 | 6 | 0 | 3.458921  | 4.333339  | 1.279964  |
| 74 | 1 | 0 | 2.584343  | 4.523073  | 1.912722  |
| 75 | 1 | 0 | 3.862590  | 3.351731  | 1.550732  |
| 76 | 1 | 0 | 4.221270  | 5.085240  | 1.517245  |

-----

SCF Done: E(RB3LYP) = -1818.12646347 A.U. after 4 cycles  
Zero-point correction= 0.625876  
(Hartree/Particle)  
Thermal correction to Energy= 0.664421  
Thermal correction to Enthalpy= 0.665365  
Thermal correction to Gibbs Free Energy= 0.553345

Sum of electronic and zero-point Energies= -1817.500588  
 Sum of electronic and thermal Energies= -1817.462042  
 Sum of electronic and thermal Enthalpies= -1817.461098  
 Sum of electronic and thermal Free Energies= -1817.573119  
 SCF Done: E(RB3PW91) = -1819.58840142 A.U. after 21 cycles

AcOH

Standard orientation:

```

-----
Center      Atomic      Atomic      Coordinates (Angstroms)
Number      Number      Type        X           Y           Z
-----
   1         6         0         -0.088187   0.123460   -0.000263
   2         8         0         -0.635038   1.208946   0.000033
   3         8         0         -0.789807  -1.038368  -0.000060
   4         1         0         -1.739616  -0.810955   0.000732
   5         6         0         1.397018  -0.120048  -0.000088
   6         1         0         1.679955  -0.696083   0.887579
   7         1         0         1.678842  -0.711201  -0.877978
   8         1         0         1.926599   0.833147  -0.008017
-----
  
```

SCF Done: E(RB3LYP) = -229.099981446 A.U. after 1 cycles

Zero-point correction= 0.061617  
 (Hartree/Particle)

Thermal correction to Energy= 0.066216  
 Thermal correction to Enthalpy= 0.067160  
 Thermal correction to Gibbs Free Energy= 0.034208

Sum of electronic and zero-point Energies= -229.038364  
 Sum of electronic and thermal Energies= -229.033766  
 Sum of electronic and thermal Enthalpies= -229.032821  
 Sum of electronic and thermal Free Energies= -229.065774

SCF Done: E(RB3PW91) = -229.083814680 A.U. after 10 cycles

TS8

Standard orientation:

```

-----
  
```

| Center<br>Number | Atomic<br>Number | Atomic<br>Type | Coordinates (Angstroms) |           |           |
|------------------|------------------|----------------|-------------------------|-----------|-----------|
|                  |                  |                | X                       | Y         | Z         |
| 1                | 6                | 0              | 3.346748                | -2.548804 | -2.819050 |
| 2                | 6                | 0              | 2.687268                | -1.407327 | -2.358247 |
| 3                | 6                | 0              | 2.333623                | -1.267120 | -0.999670 |
| 4                | 6                | 0              | 2.610418                | -2.354298 | -0.117379 |
| 5                | 6                | 0              | 3.305589                | -3.479334 | -0.585797 |
| 6                | 6                | 0              | 3.683897                | -3.574402 | -1.925109 |
| 7                | 1                | 0              | 3.623391                | -2.622224 | -3.868077 |
| 8                | 1                | 0              | 2.491927                | -0.590482 | -3.046442 |
| 9                | 1                | 0              | 3.502360                | -4.291088 | 0.109337  |
| 10               | 1                | 0              | 4.223243                | -4.450488 | -2.276516 |
| 11               | 6                | 0              | 2.616660                | 0.580555  | -0.632068 |
| 12               | 6                | 0              | 1.356482                | 2.285478  | -2.170338 |
| 13               | 6                | 0              | 2.399807                | 3.059600  | -2.735989 |
| 14               | 6                | 0              | 0.027670                | 2.606352  | -2.523860 |
| 15               | 6                | 0              | 2.118392                | 4.114164  | -3.600974 |
| 16               | 1                | 0              | 3.430019                | 2.820884  | -2.487038 |
| 17               | 6                | 0              | -0.248308               | 3.664147  | -3.389983 |
| 18               | 1                | 0              | -0.781461               | 2.009447  | -2.116563 |
| 19               | 6                | 0              | 0.792799                | 4.425740  | -3.931470 |
| 20               | 1                | 0              | 2.935427                | 4.694757  | -4.022491 |
| 21               | 1                | 0              | -1.279824               | 3.891862  | -3.648128 |
| 22               | 1                | 0              | 0.576121                | 5.248248  | -4.608086 |
| 23               | 6                | 0              | 3.893068                | 0.902585  | 0.019567  |
| 24               | 6                | 0              | 4.057645                | 2.203012  | 0.541873  |
| 25               | 6                | 0              | 4.968081                | 0.002721  | 0.119906  |
| 26               | 6                | 0              | 5.256789                | 2.589171  | 1.138553  |
| 27               | 1                | 0              | 3.232445                | 2.906878  | 0.478121  |
| 28               | 6                | 0              | 6.167959                | 0.392567  | 0.719022  |
| 29               | 1                | 0              | 4.869686                | -1.001957 | -0.273713 |
| 30               | 6                | 0              | 6.319662                | 1.683651  | 1.231073  |
| 31               | 1                | 0              | 5.359175                | 3.595613  | 1.536941  |
| 32               | 1                | 0              | 6.985802                | -0.320310 | 0.786371  |
| 33               | 1                | 0              | 7.253583                | 1.981068  | 1.700929  |

|    |    |   |           |           |           |
|----|----|---|-----------|-----------|-----------|
| 34 | 6  | 0 | 1.658224  | 1.197985  | -1.279633 |
| 35 | 28 | 0 | 0.849177  | -0.207181 | -0.246416 |
| 36 | 6  | 0 | 2.001832  | -2.309018 | 1.203603  |
| 37 | 6  | 0 | 1.325417  | -2.686545 | 3.180236  |
| 38 | 6  | 0 | 0.544514  | -1.611420 | 2.638457  |
| 39 | 6  | 0 | 1.089214  | -3.150086 | 4.486335  |
| 40 | 6  | 0 | -0.475153 | -1.013357 | 3.399844  |
| 41 | 6  | 0 | 0.079150  | -2.545676 | 5.230154  |
| 42 | 1  | 0 | 1.684293  | -3.962897 | 4.896225  |
| 43 | 6  | 0 | -0.694885 | -1.490887 | 4.690533  |
| 44 | 1  | 0 | -1.078327 | -0.204448 | 2.999417  |
| 45 | 1  | 0 | -0.122996 | -2.888132 | 6.242597  |
| 46 | 1  | 0 | -1.478188 | -1.043140 | 5.298620  |
| 47 | 7  | 0 | 2.240354  | -3.113373 | 2.245049  |
| 48 | 7  | 0 | 1.006858  | -1.388679 | 1.363156  |
| 49 | 7  | 0 | -0.972051 | -1.011578 | -1.116183 |
| 50 | 6  | 0 | -1.047898 | -2.071029 | -1.923508 |
| 51 | 6  | 0 | -2.118154 | -0.491584 | -0.629263 |
| 52 | 6  | 0 | -2.254562 | -2.668210 | -2.289151 |
| 53 | 1  | 0 | -0.100365 | -2.458234 | -2.289859 |
| 54 | 6  | 0 | -3.362184 | -1.041665 | -0.947487 |
| 55 | 6  | 0 | -1.946150 | 0.693145  | 0.258086  |
| 56 | 6  | 0 | -3.460951 | -2.157660 | -1.793897 |
| 57 | 1  | 0 | -2.228256 | -3.527388 | -2.948512 |
| 58 | 1  | 0 | -4.261942 | -0.609312 | -0.526154 |
| 59 | 6  | 0 | -3.012657 | 1.442230  | 0.762529  |
| 60 | 7  | 0 | -0.667395 | 1.019372  | 0.546878  |
| 61 | 6  | 0 | -2.790521 | 2.554018  | 1.590673  |
| 62 | 1  | 0 | -4.027118 | 1.161436  | 0.505518  |
| 63 | 6  | 0 | -0.435968 | 2.079014  | 1.325960  |
| 64 | 6  | 0 | -1.452492 | 2.864236  | 1.866379  |
| 65 | 1  | 0 | 0.607629  | 2.301920  | 1.528433  |
| 66 | 1  | 0 | -1.179336 | 3.702195  | 2.495837  |
| 67 | 6  | 0 | -3.975150 | 3.363460  | 2.140555  |
| 68 | 6  | 0 | -3.515935 | 4.525732  | 3.041807  |
| 69 | 1  | 0 | -2.888939 | 5.242954  | 2.499405  |

|    |   |   |           |           |           |
|----|---|---|-----------|-----------|-----------|
| 70 | 1 | 0 | -4.393546 | 5.068829  | 3.409720  |
| 71 | 1 | 0 | -2.958333 | 4.169809  | 3.915894  |
| 72 | 6 | 0 | -4.887528 | 2.430436  | 2.974212  |
| 73 | 1 | 0 | -5.738310 | 2.998163  | 3.369375  |
| 74 | 1 | 0 | -5.287585 | 1.604943  | 2.375910  |
| 75 | 1 | 0 | -4.342313 | 1.999992  | 3.822003  |
| 76 | 6 | 0 | -4.781995 | 3.951081  | 0.956488  |
| 77 | 1 | 0 | -5.637897 | 4.521561  | 1.336427  |
| 78 | 1 | 0 | -4.163452 | 4.626605  | 0.354028  |
| 79 | 1 | 0 | -5.169922 | 3.168494  | 0.295463  |
| 80 | 6 | 0 | -4.834721 | -2.759469 | -2.127896 |
| 81 | 6 | 0 | -5.710006 | -1.682656 | -2.814808 |
| 82 | 1 | 0 | -6.694548 | -2.100376 | -3.056895 |
| 83 | 1 | 0 | -5.867741 | -0.810953 | -2.170406 |
| 84 | 1 | 0 | -5.249500 | -1.335386 | -3.747213 |
| 85 | 6 | 0 | -4.724102 | -3.971320 | -3.073143 |
| 86 | 1 | 0 | -4.137976 | -4.784729 | -2.629984 |
| 87 | 1 | 0 | -5.726220 | -4.363171 | -3.280584 |
| 88 | 1 | 0 | -4.270321 | -3.701948 | -4.034203 |
| 89 | 6 | 0 | -5.519379 | -3.221996 | -0.818200 |
| 90 | 1 | 0 | -4.919883 | -3.983954 | -0.307021 |
| 91 | 1 | 0 | -5.674461 | -2.391917 | -0.120404 |
| 92 | 1 | 0 | -6.500908 | -3.655547 | -1.044481 |

-----

SCF Done: E(RB3LYP) = -2128.48254772 A.U. after 6 cycles  
Zero-point correction= 0.754242  
(Hartree/Particle)  
Thermal correction to Energy= 0.798844  
Thermal correction to Enthalpy= 0.799788  
Thermal correction to Gibbs Free Energy= 0.672527  
Sum of electronic and zero-point Energies= -2127.728306  
Sum of electronic and thermal Energies= -2127.683704  
Sum of electronic and thermal Enthalpies= -2127.682760  
Sum of electronic and thermal Free Energies= -2127.810021  
SCF Done: E(RB3PW91) = -2129.88359115 A.U. after 21 cycles

Int13

Standard orientation:

| Center<br>Number | Atomic<br>Number | Atomic<br>Type | Coordinates (Angstroms) |           |           |
|------------------|------------------|----------------|-------------------------|-----------|-----------|
|                  |                  |                | X                       | Y         | Z         |
| 1                | 6                | 0              | -2.130141               | 0.903198  | 4.391729  |
| 2                | 6                | 0              | -2.392555               | 1.225710  | 3.061260  |
| 3                | 6                | 0              | -2.270614               | 0.279854  | 2.025263  |
| 4                | 6                | 0              | -1.879151               | -1.042297 | 2.370941  |
| 5                | 6                | 0              | -1.653100               | -1.363704 | 3.721745  |
| 6                | 6                | 0              | -1.766409               | -0.405525 | 4.726854  |
| 7                | 1                | 0              | -2.222770               | 1.664168  | 5.163112  |
| 8                | 1                | 0              | -2.713877               | 2.233515  | 2.809760  |
| 9                | 1                | 0              | -1.386549               | -2.387453 | 3.967841  |
| 10               | 1                | 0              | -1.576962               | -0.677761 | 5.762328  |
| 11               | 6                | 0              | -2.651832               | 0.674817  | 0.629316  |
| 12               | 6                | 0              | -2.230971               | 0.459233  | -1.850527 |
| 13               | 6                | 0              | -3.396346               | -0.204013 | -2.292304 |
| 14               | 6                | 0              | -1.428241               | 1.080513  | -2.829946 |
| 15               | 6                | 0              | -3.753559               | -0.222003 | -3.640573 |
| 16               | 1                | 0              | -4.017101               | -0.716129 | -1.563269 |
| 17               | 6                | 0              | -1.792651               | 1.076361  | -4.178355 |
| 18               | 1                | 0              | -0.509180               | 1.576864  | -2.533638 |
| 19               | 6                | 0              | -2.958278               | 0.424695  | -4.592898 |
| 20               | 1                | 0              | -4.654652               | -0.747097 | -3.948866 |
| 21               | 1                | 0              | -1.158440               | 1.575720  | -4.907718 |
| 22               | 1                | 0              | -3.237131               | 0.411169  | -5.643621 |
| 23               | 6                | 0              | -3.977651               | 1.364517  | 0.498853  |
| 24               | 6                | 0              | -4.135737               | 2.518214  | -0.290040 |
| 25               | 6                | 0              | -5.108677               | 0.877698  | 1.182268  |
| 26               | 6                | 0              | -5.374946               | 3.152200  | -0.406979 |
| 27               | 1                | 0              | -3.277481               | 2.920339  | -0.821279 |
| 28               | 6                | 0              | -6.350366               | 1.505153  | 1.062885  |
| 29               | 1                | 0              | -5.013767               | -0.008816 | 1.803757  |
| 30               | 6                | 0              | -6.490847               | 2.647168  | 0.267209  |

|    |    |   |           |           |           |
|----|----|---|-----------|-----------|-----------|
| 31 | 1  | 0 | -5.467128 | 4.043036  | -1.024177 |
| 32 | 1  | 0 | -7.209709 | 1.099899  | 1.592085  |
| 33 | 1  | 0 | -7.456454 | 3.138586  | 0.176834  |
| 34 | 6  | 0 | -1.840412 | 0.400499  | -0.423179 |
| 35 | 28 | 0 | -0.116095 | -0.340893 | -0.121519 |
| 36 | 6  | 0 | -1.744235 | -2.124628 | 1.371473  |
| 37 | 6  | 0 | -1.177513 | -3.139230 | -0.472146 |
| 38 | 6  | 0 | -1.917750 | -4.012362 | 0.379992  |
| 39 | 6  | 0 | -0.722428 | -3.558064 | -1.732433 |
| 40 | 6  | 0 | -2.200729 | -5.325527 | -0.031847 |
| 41 | 6  | 0 | -1.014671 | -4.864246 | -2.122905 |
| 42 | 1  | 0 | -0.177154 | -2.883163 | -2.388086 |
| 43 | 6  | 0 | -1.743445 | -5.738248 | -1.282110 |
| 44 | 1  | 0 | -2.767644 | -5.994081 | 0.611866  |
| 45 | 1  | 0 | -0.684809 | -5.216607 | -3.097648 |
| 46 | 1  | 0 | -1.954689 | -6.748721 | -1.624658 |
| 47 | 7  | 0 | -1.061637 | -1.942819 | 0.200901  |
| 48 | 7  | 0 | -2.256556 | -3.348551 | 1.540179  |
| 49 | 7  | 0 | 0.894890  | 1.348126  | -0.160004 |
| 50 | 6  | 0 | 0.377292  | 2.585190  | -0.167707 |
| 51 | 6  | 0 | 2.248612  | 1.225118  | -0.111684 |
| 52 | 6  | 0 | 1.157206  | 3.739083  | -0.157365 |
| 53 | 1  | 0 | -0.705047 | 2.640507  | -0.179003 |
| 54 | 6  | 0 | 3.080534  | 2.343033  | -0.105495 |
| 55 | 6  | 0 | 2.739664  | -0.169313 | -0.023487 |
| 56 | 6  | 0 | 2.553579  | 3.644169  | -0.135093 |
| 57 | 1  | 0 | 0.650983  | 4.696554  | -0.167135 |
| 58 | 1  | 0 | 4.153311  | 2.198612  | -0.066099 |
| 59 | 6  | 0 | 4.085931  | -0.528751 | 0.002917  |
| 60 | 7  | 0 | 1.755128  | -1.096195 | 0.059222  |
| 61 | 6  | 0 | 4.469489  | -1.874854 | 0.129270  |
| 62 | 1  | 0 | 4.844008  | 0.241540  | -0.074281 |
| 63 | 6  | 0 | 2.102085  | -2.381235 | 0.191980  |
| 64 | 6  | 0 | 3.429821  | -2.806444 | 0.231616  |
| 65 | 1  | 0 | 1.284596  | -3.089291 | 0.263816  |
| 66 | 1  | 0 | 3.624320  | -3.866317 | 0.339220  |



|    |   |   |          |           |           |
|----|---|---|----------|-----------|-----------|
| 67 | 6 | 0 | 5.955576 | -2.261193 | 0.150570  |
| 68 | 6 | 0 | 6.157544 | -3.780254 | 0.310159  |
| 69 | 1 | 0 | 5.734211 | -4.153399 | 1.249907  |
| 70 | 1 | 0 | 5.711014 | -4.342616 | -0.518042 |
| 71 | 1 | 0 | 7.229721 | -4.005455 | 0.319798  |
| 72 | 6 | 0 | 6.613514 | -1.816157 | -1.178965 |
| 73 | 1 | 0 | 6.547068 | -0.732851 | -1.328104 |
| 74 | 1 | 0 | 7.675836 | -2.087558 | -1.177256 |
| 75 | 1 | 0 | 6.139152 | -2.305643 | -2.037437 |
| 76 | 6 | 0 | 6.651846 | -1.547810 | 1.335833  |
| 77 | 1 | 0 | 6.585842 | -0.457117 | 1.257088  |
| 78 | 1 | 0 | 6.206726 | -1.845518 | 2.292251  |
| 79 | 1 | 0 | 7.714888 | -1.815150 | 1.357563  |
| 80 | 6 | 0 | 3.486337 | 4.863377  | -0.126416 |
| 81 | 6 | 0 | 4.436497 | 4.788089  | -1.347098 |
| 82 | 1 | 0 | 5.106572 | 5.655693  | -1.349188 |
| 83 | 1 | 0 | 5.060587 | 3.887919  | -1.330280 |
| 84 | 1 | 0 | 3.872982 | 4.791971  | -2.287361 |
| 85 | 6 | 0 | 4.320141 | 4.853197  | 1.179005  |
| 86 | 1 | 0 | 4.935575 | 3.951255  | 1.267120  |
| 87 | 1 | 0 | 4.993019 | 5.718620  | 1.196159  |
| 88 | 1 | 0 | 3.672683 | 4.908148  | 2.061692  |
| 89 | 6 | 0 | 2.706451 | 6.190239  | -0.197776 |
| 90 | 1 | 0 | 2.108657 | 6.265200  | -1.113745 |
| 91 | 1 | 0 | 2.040350 | 6.322292  | 0.662686  |
| 92 | 1 | 0 | 3.413124 | 7.027380  | -0.196406 |

-----  
SCF Done: E(RB3LYP) = -2128.56492263 A.U. after 7 cycles

Zero-point correction= 0.758002

(Hartree/Particle)

Thermal correction to Energy= 0.802143

Thermal correction to Enthalpy= 0.803088

Thermal correction to Gibbs Free Energy= 0.678794

Sum of electronic and zero-point Energies= -2127.806920

Sum of electronic and thermal Energies= -2127.762779

Sum of electronic and thermal Enthalpies= -2127.761835

Sum of electronic and thermal Free Energies= -2127.886129  
 SCF Done: E(RB3PW91) = -2129.96099446 A.U. after 18 cycles

TS9

Standard orientation:

| Center<br>Number | Atomic<br>Number | Atomic<br>Type | Coordinates (Angstroms) |           |           |
|------------------|------------------|----------------|-------------------------|-----------|-----------|
|                  |                  |                | X                       | Y         | Z         |
| 1                | 6                | 0              | -2.598309               | 0.644672  | 4.549378  |
| 2                | 6                | 0              | -2.807370               | 0.982736  | 3.224660  |
| 3                | 6                | 0              | -2.469314               | 0.103549  | 2.154355  |
| 4                | 6                | 0              | -1.890780               | -1.157838 | 2.523995  |
| 5                | 6                | 0              | -1.712296               | -1.496562 | 3.884681  |
| 6                | 6                | 0              | -2.052282               | -0.612068 | 4.892890  |
| 7                | 1                | 0              | -2.851709               | 1.357919  | 5.330843  |
| 8                | 1                | 0              | -3.225504               | 1.955731  | 2.985391  |
| 9                | 1                | 0              | -1.294985               | -2.471727 | 4.118595  |
| 10               | 1                | 0              | -1.894361               | -0.877880 | 5.934920  |
| 11               | 6                | 0              | -2.740039               | 0.432296  | 0.773015  |
| 12               | 6                | 0              | -2.482830               | -0.195686 | -1.678358 |
| 13               | 6                | 0              | -3.709648               | -0.810424 | -1.983417 |
| 14               | 6                | 0              | -1.742813               | 0.366058  | -2.730636 |
| 15               | 6                | 0              | -4.185588               | -0.853917 | -3.294920 |
| 16               | 1                | 0              | -4.291828               | -1.255927 | -1.181232 |
| 17               | 6                | 0              | -2.220682               | 0.335922  | -4.043977 |
| 18               | 1                | 0              | -0.783498               | 0.829489  | -2.516272 |
| 19               | 6                | 0              | -3.444198               | -0.277042 | -4.331369 |
| 20               | 1                | 0              | -5.135599               | -1.338023 | -3.507812 |
| 21               | 1                | 0              | -1.634369               | 0.785444  | -4.842151 |
| 22               | 1                | 0              | -3.814550               | -0.308720 | -5.353093 |
| 23               | 6                | 0              | -3.861476               | 1.361603  | 0.462161  |
| 24               | 6                | 0              | -3.763603               | 2.391111  | -0.497328 |
| 25               | 6                | 0              | -5.100923               | 1.233321  | 1.129671  |
| 26               | 6                | 0              | -4.837742               | 3.238190  | -0.780101 |
| 27               | 1                | 0              | -2.833594               | 2.529007  | -1.039690 |

|    |    |   |           |           |           |
|----|----|---|-----------|-----------|-----------|
| 28 | 6  | 0 | -6.174459 | 2.080897  | 0.855681  |
| 29 | 1  | 0 | -5.223093 | 0.442502  | 1.864589  |
| 30 | 6  | 0 | -6.052022 | 3.092790  | -0.103617 |
| 31 | 1  | 0 | -4.720598 | 4.018503  | -1.529119 |
| 32 | 1  | 0 | -7.114439 | 1.942480  | 1.385598  |
| 33 | 1  | 0 | -6.887996 | 3.753155  | -0.320352 |
| 34 | 6  | 0 | -1.976398 | -0.185136 | -0.263452 |
| 35 | 28 | 0 | -0.092560 | -0.338879 | -0.034195 |
| 36 | 6  | 0 | -1.594807 | -2.129567 | 1.506070  |
| 37 | 6  | 0 | -1.274817 | -2.890932 | -0.576645 |
| 38 | 6  | 0 | -1.344554 | -3.943169 | 0.373830  |
| 39 | 6  | 0 | -1.062662 | -3.136176 | -1.935666 |
| 40 | 6  | 0 | -1.220915 | -5.277997 | -0.049954 |
| 41 | 6  | 0 | -0.941746 | -4.467869 | -2.338390 |
| 42 | 1  | 0 | -0.999141 | -2.330209 | -2.658098 |
| 43 | 6  | 0 | -1.021846 | -5.524636 | -1.406226 |
| 44 | 1  | 0 | -1.283505 | -6.087850 | 0.672220  |
| 45 | 1  | 0 | -0.784605 | -4.691650 | -3.390367 |
| 46 | 1  | 0 | -0.927044 | -6.549848 | -1.756379 |
| 47 | 7  | 0 | -1.406133 | -1.699479 | 0.173875  |
| 48 | 7  | 0 | -1.540735 | -3.450174 | 1.647052  |
| 49 | 7  | 0 | 0.862814  | 1.372917  | -0.181233 |
| 50 | 6  | 0 | 0.293996  | 2.583681  | -0.250789 |
| 51 | 6  | 0 | 2.218409  | 1.305911  | -0.116762 |
| 52 | 6  | 0 | 1.023705  | 3.769731  | -0.292131 |
| 53 | 1  | 0 | -0.790269 | 2.593737  | -0.264111 |
| 54 | 6  | 0 | 3.004002  | 2.457533  | -0.150559 |
| 55 | 6  | 0 | 2.767818  | -0.068195 | 0.018245  |
| 56 | 6  | 0 | 2.423011  | 3.732436  | -0.249464 |
| 57 | 1  | 0 | 0.480415  | 4.704811  | -0.353501 |
| 58 | 1  | 0 | 4.081679  | 2.362634  | -0.089009 |
| 59 | 6  | 0 | 4.129172  | -0.370924 | 0.001917  |
| 60 | 7  | 0 | 1.828351  | -1.032233 | 0.167192  |
| 61 | 6  | 0 | 4.575083  | -1.695347 | 0.149231  |
| 62 | 1  | 0 | 4.850146  | 0.427068  | -0.131471 |
| 63 | 6  | 0 | 2.236734  | -2.298284 | 0.307664  |

|    |   |   |          |           |           |
|----|---|---|----------|-----------|-----------|
| 64 | 6 | 0 | 3.581302 | -2.669051 | 0.308617  |
| 65 | 1 | 0 | 1.454212 | -3.042685 | 0.421429  |
| 66 | 1 | 0 | 3.825914 | -3.717027 | 0.431815  |
| 67 | 6 | 0 | 6.076981 | -2.016924 | 0.128226  |
| 68 | 6 | 0 | 6.350791 | -3.522992 | 0.304261  |
| 69 | 1 | 0 | 5.972453 | -3.899482 | 1.261759  |
| 70 | 1 | 0 | 5.904945 | -4.117368 | -0.501751 |
| 71 | 1 | 0 | 7.431814 | -3.700586 | 0.285026  |
| 72 | 6 | 0 | 6.675455 | -1.566905 | -1.227394 |
| 73 | 1 | 0 | 6.558880 | -0.490006 | -1.391215 |
| 74 | 1 | 0 | 7.748019 | -1.793174 | -1.255048 |
| 75 | 1 | 0 | 6.196202 | -2.089781 | -2.063231 |
| 76 | 6 | 0 | 6.777621 | -1.255092 | 1.280098  |
| 77 | 1 | 0 | 6.655703 | -0.170183 | 1.189595  |
| 78 | 1 | 0 | 6.378401 | -1.559790 | 2.254479  |
| 79 | 1 | 0 | 7.852577 | -1.471166 | 1.269974  |
| 80 | 6 | 0 | 3.304357 | 4.989242  | -0.293570 |
| 81 | 6 | 0 | 4.257101 | 4.900815  | -1.511410 |
| 82 | 1 | 0 | 4.890414 | 5.794794  | -1.553992 |
| 83 | 1 | 0 | 4.917743 | 4.028630  | -1.455867 |
| 84 | 1 | 0 | 3.693501 | 4.838568  | -2.449704 |
| 85 | 6 | 0 | 4.137891 | 5.073335  | 1.009023  |
| 86 | 1 | 0 | 4.789933 | 4.202442  | 1.137305  |
| 87 | 1 | 0 | 4.774714 | 5.965650  | 0.986213  |
| 88 | 1 | 0 | 3.488273 | 5.141213  | 1.889276  |
| 89 | 6 | 0 | 2.470162 | 6.278434  | -0.421886 |
| 90 | 1 | 0 | 1.871242 | 6.289269  | -1.340107 |
| 91 | 1 | 0 | 1.797217 | 6.418307  | 0.432017  |
| 92 | 1 | 0 | 3.141049 | 7.143948  | -0.456102 |

-----

SCF Done: E(RB3LYP) = -2128.52589970 A.U. after 4 cycles  
Zero-point correction= 0.756150  
(Hartree/Particle)  
Thermal correction to Energy= 0.799736  
Thermal correction to Enthalpy= 0.800680  
Thermal correction to Gibbs Free Energy= 0.678127

Sum of electronic and zero-point Energies= -2127.769750  
 Sum of electronic and thermal Energies= -2127.726163  
 Sum of electronic and thermal Enthalpies= -2127.725219  
 Sum of electronic and thermal Free Energies= -2127.847773  
 SCF Done: E(RB3PW91) = -2129.92245528 A.U. after 22 cycles

## 11. References

1. Frisch, M. J.; Trucks, G. W.; Schlegel, H. B.; Scuseria, G. E.; Robb, M. A.; Cheeseman, J. R.; Scalmani, G.; Barone, V.; Mennucci, B.; Petersson, G. A.; Nakatsuji, H.; Caricato, M.; Li, X.; Hratchian, H. P.; Izmaylov, A. F.; Bloino, J.; Zheng, G.; Sonnenberg, J. L.; Hada, M.; Ehara, M.; Toyota, K.; Fukuda, R.; Hasegawa, J.; Ishida, M.; Nakajima, T.; Honda, Y.; Kitao, O.; Nakai, H.; Vreven, T.; Montgomery, J. A., Jr.; Peralta, J. E.; Ogliaro, F.; Bearpark, M.; Heyd, J. J.; Brothers, E.; Kudin, K. N.; Staroverov, V. N.; Keith, T.; Kobayashi, R.; Normand, J.; Raghavachari, K.; Rendell, A.; Burant, J. C.; Iyengar, S. S.; Tomasi, J.; Cossi, M.; Rega, N.; Millam, N. J.; Klene, M.; Knox, J. E.; Cross, J. B.; Bakken, V.; Adamo, C.; Jaramillo, J.; Gomperts, R.; Stratmann, R. E.; Yazyev, O.; Austin, A. J.; Cammi, R.; Pomelli, C.; Ochterski, J. W.; Martin, R. L.; Morokuma, K.; Zakrzewski, V. G.; Voth, G. A.; Salvador, P.; Dannenberg, J. J.; Dapprich, S.; Daniels, A. D.; Farkas, Ö.; Foresman, J. B.; Ortiz, J. V.; Cioslowski, J.; Fox, D. J. *Gaussian 09, Revision D.01*; Gaussian, Inc.: Wallingford, CT, 2013.
2. Hay, P. J.; Wadt, W. R. *J. Chem. Phys.* **1985**, *82*, 270-283.
3. Wadt, W. R.; Hay, P. J. *J. Chem. Phys.* **1985**, *82*, 284-298.
4. Hay, P. J.; Wadt, W. R. *J. Chem. Phys.* **1985**, *82*, 299-310.
5. Andrae, D.; Haussermann, U.; Dolg, M.; Stoll, H.; Preuss, H. *Theor Chim Acta* **1990**, *77*, 123-141.
6. Igelmann, G.; Stoll, H.; Preuss, H. *Mol. Phys.* **1988**, *65*, 1321-1328.
7. Vonszentpaly, L.; Fuentealba, P.; Preuss, H.; Stoll, H. *Chem. Phys. Lett.* **1982**, *93*, 555.
8. Cancès, E.; Mennucci, B.; Tomasi, J. *J. Chem. Phys.* **1997**, *107*, 3032-3041.
9. Cossi, M.; Barone, V.; Mennucci, B.; Tomasi, J. *Chem. Phys. Lett.* **1998**, *286*, 253-260.
10. Marenich, A. V.; Cramer, C. J.; Truhlar, D. G. *J. Phys. Chem. B* **2009**, *113*, 6378-6396.
11. Fukui, K. *J. Phys. Chem.* **1970**, *74*, 4161-4163.
12. Gonzalez, C.; Schlegel, H. B. *J. Chem. Phys.* **1989**, *90*, 2154-2161.
